# Supplementary material
Source: bioRxiv or medRxiv preprint supplement (https://medrxiv.org/highwire/filestream/89294/field_highwire_adjunct_files/0/2020.06.16.20132464-1.pdf)
Supplement: Supplementary file [file 2020.06.16.20132464-1.pdf]

Corona virus data:

<https://www.worldometers.info/coronavirus/> 1 June 2020

Live Animal production data <http://www.fao.org/faostat/en/#data/QA>

S. A. RAFAT \*/

/\*

Domain CodeDomainCountry CodeCountryElement CodeElementItem CodeItemYear CodeYearUnitValueFlagFlag Des  
Food supply quantity kg/capita/yr 2013 fao stat \*/

```
data          food;
input         country
cards
Afghanistan   BovineMeat      2013      kg      4.59
Afghanistan   ButterGhee      2013      kg      1.17
Afghanistan   Cheese          2013      kg      0.79
Afghanistan   Cream          2013      kg      0.6
Afghanistan   Eggs           2013      kg      1.3
Afghanistan   FreshwaterFish 2013      kg      0.07
Afghanistan   Honey          2013      kg      0.07
Afghanistan   MilkWhole      2013      kg      31.92
Afghanistan   PoultryMeat    2013      kg      2.45
Albania       AquaticAnimalsOthers 2013      kg      0
Albania       AquaticPlants  2013      kg      0
Albania       BovineMeat      2013      kg      22.5
Albania       ButterGhee      2013      kg      1.19
Albania       Cephalopods     2013      kg      0.37
Albania       Cheese          2013      kg      6.25
Albania       Cream          2013      kg      0.03
Albania       DemersalFish    2013      kg      0.98
Albania       Eggs           2013      kg      12.45
Albania       FreshwaterFish  2013      kg      0.76
Albania       Honey          2013      kg      0.95
Albania       MarineFishOther 2013      kg      0.67
Albania       MilkWhole      2013      kg      235.18
Albania       Pigmeat        2013      kg      10.88
Albania       PoultryMeat    2013      kg      13.23
Algeria       AquaticAnimalsOthers 2013      kg      0
Algeria       AquaticPlants  2013      kg      0
Algeria       BovineMeat      2013      kg      5.6
Algeria       ButterGhee      2013      kg      0.5
Algeria       Cephalopods     2013      kg      0.05
Algeria       Cheese          2013      kg      0.7
Algeria       DemersalFish    2013      kg      0.42
Algeria       Eggs           2013      kg      8.06
Algeria       FreshwaterFish  2013      kg      0.34
Algeria       Honey          2013      kg      0.17
Algeria       MarineFishOther 2013      kg      0.43
Algeria       MilkWhole      2013      kg      100.83
```

|                   |                      |      |    |       |  |
|-------------------|----------------------|------|----|-------|--|
| Algeria           | Pigmeat              | 2013 | kg | 0     |  |
| Algeria           | PoultryMeat          | 2013 | kg | 7.42  |  |
| Algeria           | Whey                 | 2013 | kg | 1.05  |  |
| Angola            | AquaticAnimalsOthers | 2013 | kg | 0     |  |
| Angola            | AquaticPlants        | 2013 | kg | 0     |  |
| Angola            | BovineMeat           | 2013 | kg | 8.42  |  |
| Angola            | ButterGhee           | 2013 | kg | 0.09  |  |
| Angola            | Cephalopods          | 2013 | kg | 0.06  |  |
| Angola            | Cheese               | 2013 | kg | 0.24  |  |
| Angola            | DemersalFish         | 2013 | kg | 6.12  |  |
| Angola            | Eggs                 | 2013 | kg | 1.11  |  |
| Angola            | FreshwaterFish       | 2013 | kg | 0.92  |  |
| Angola            | Honey                | 2013 | kg | 1.09  |  |
| Angola            | MarineFishOther      | 2013 | kg | 1.14  |  |
| Angola            | MilkWhole            | 2013 | kg | 9.68  |  |
| Angola            | Pigmeat              | 2013 | kg | 8.89  |  |
| Angola            | PoultryMeat          | 2013 | kg | 17.33 |  |
| AntiguaandBarbuda | AquaticPlants        | 2013 | kg | 0     |  |
| AntiguaandBarbuda | BovineMeat           | 2013 | kg | 12.42 |  |
| AntiguaandBarbuda | ButterGhee           | 2013 | kg | 1.76  |  |
| AntiguaandBarbuda | Cephalopods          | 2013 | kg | 0.3   |  |
| AntiguaandBarbuda | Cheese               | 2013 | kg | 6.08  |  |
| AntiguaandBarbuda | Cream                | 2013 | kg | 1.41  |  |
| AntiguaandBarbuda | DemersalFish         | 2013 | kg | 8.43  |  |
| AntiguaandBarbuda | Eggs                 | 2013 | kg | 4.33  |  |
| AntiguaandBarbuda | FreshwaterFish       | 2013 | kg | 0.74  |  |
| AntiguaandBarbuda | Honey                | 2013 | kg | 0.42  |  |
| AntiguaandBarbuda | MarineFishOther      | 2013 | kg | 18.02 |  |
| AntiguaandBarbuda | MilkWhole            | 2013 | kg | 80.09 |  |
| AntiguaandBarbuda | Pigmeat              | 2013 | kg | 11.44 |  |
| AntiguaandBarbuda | PoultryMeat          | 2013 | kg | 58.82 |  |
| Argentina         | AquaticAnimalsOthers | 2013 | kg | 0     |  |
| Argentina         | AquaticPlants        | 2013 | kg | 0     |  |
| Argentina         | BovineMeat           | 2013 | kg | 55.48 |  |
| Argentina         | ButterGhee           | 2013 | kg | 0.92  |  |
| Argentina         | Cephalopods          | 2013 | kg | 1.51  |  |
| Argentina         | Cheese               | 2013 | kg | 11.96 |  |
| Argentina         | Cream                | 2013 | kg | 0.1   |  |
| Argentina         | DemersalFish         | 2013 | kg | 2.63  |  |
| Argentina         | Eggs                 | 2013 | kg | 11.39 |  |
| Argentina         | FreshwaterFish       | 2013 | kg | 0.21  |  |
| Argentina         | Honey                | 2013 | kg | 0.06  |  |
| Argentina         | MarineFishOther      | 2013 | kg | 0.01  |  |
| Argentina         | MilkWhole            | 2013 | kg | 72.81 |  |
| Argentina         | Pigmeat              | 2013 | kg | 10.51 |  |
| Argentina         | PoultryMeat          | 2013 | kg | 38.66 |  |
| Argentina         | Whey                 | 2013 | kg | 1.74  |  |
| Armenia           | AquaticAnimalsOthers | 2013 | kg | 0     |  |
| Armenia           | AquaticPlants        | 2013 | kg | 0     |  |
| Armenia           | BovineMeat           | 2013 | kg | 19.66 |  |
| Armenia           | ButterGhee           | 2013 | kg | 1.76  |  |
| Armenia           | Cephalopods          | 2013 | kg | 0     |  |
| Armenia           | Cheese               | 2013 | kg | 5.72  |  |
| Armenia           | Cream                | 2013 | kg | 0.01  |  |
| Armenia           | DemersalFish         | 2013 | kg | 0.07  |  |
| Armenia           | Eggs                 | 2013 | kg | 11.69 |  |

|            |                      |      |    |        |  |
|------------|----------------------|------|----|--------|--|
| Armenia    | FreshwaterFish       | 2013 | kg | 3.28   |  |
| Armenia    | Honey                | 2013 | kg | 0.7    |  |
| Armenia    | MarineFishOther      | 2013 | kg | 0.18   |  |
| Armenia    | MilkWhole            | 2013 | kg | 162.96 |  |
| Armenia    | Pigmeat              | 2013 | kg | 9.67   |  |
| Armenia    | PoultryMeat          | 2013 | kg | 13.35  |  |
| Australia  | AquaticAnimalsOthers | 2013 | kg | 0.23   |  |
| Australia  | AquaticPlants        | 2013 | kg | 0      |  |
| Australia  | BovineMeat           | 2013 | kg | 33.86  |  |
| Australia  | ButterGhee           | 2013 | kg | 3.67   |  |
| Australia  | Cephalopods          | 2013 | kg | 1.21   |  |
| Australia  | Cheese               | 2013 | kg | 10.17  |  |
| Australia  | Cream                | 2013 | kg | 0.29   |  |
| Australia  | DemersalFish         | 2013 | kg | 6.88   |  |
| Australia  | Eggs                 | 2013 | kg | 8.51   |  |
| Australia  | FreshwaterFish       | 2013 | kg | 4.11   |  |
| Australia  | Honey                | 2013 | kg | 0.43   |  |
| Australia  | MarineFishOther      | 2013 | kg | 2.18   |  |
| Australia  | MilkWhole            | 2013 | kg | 123.78 |  |
| Australia  | Pigmeat              | 2013 | kg | 24.14  |  |
| Australia  | PoultryMeat          | 2013 | kg | 46.12  |  |
| Austria    | AquaticAnimalsOthers | 2013 | kg | 0.03   |  |
| Austria    | AquaticPlants        | 2013 | kg | 0      |  |
| Austria    | BovineMeat           | 2013 | kg | 17.14  |  |
| Austria    | ButterGhee           | 2013 | kg | 5.54   |  |
| Austria    | Cephalopods          | 2013 | kg | 0.18   |  |
| Austria    | Cheese               | 2013 | kg | 23.29  |  |
| Austria    | Cream                | 2013 | kg | 7.91   |  |
| Austria    | DemersalFish         | 2013 | kg | 2.96   |  |
| Austria    | Eggs                 | 2013 | kg | 14.68  |  |
| Austria    | FreshwaterFish       | 2013 | kg | 4.07   |  |
| Austria    | Honey                | 2013 | kg | 1.32   |  |
| Austria    | MarineFishOther      | 2013 | kg | 0.81   |  |
| Austria    | MilkWhole            | 2013 | kg | 15.83  |  |
| Austria    | Pigmeat              | 2013 | kg | 52.56  |  |
| Austria    | PoultryMeat          | 2013 | kg | 18.61  |  |
| Azerbaijan | AquaticAnimalsOthers | 2013 | kg | 0      |  |
| Azerbaijan | AquaticPlants        | 2013 | kg | 0      |  |
| Azerbaijan | BovineMeat           | 2013 | kg | 12.68  |  |
| Azerbaijan | ButterGhee           | 2013 | kg | 3.2    |  |
| Azerbaijan | Cephalopods          | 2013 | kg | 0      |  |
| Azerbaijan | Cheese               | 2013 | kg | 7.3    |  |
| Azerbaijan | Cream                | 2013 | kg | 0      |  |
| Azerbaijan | DemersalFish         | 2013 | kg | 0.12   |  |
| Azerbaijan | Eggs                 | 2013 | kg | 8.21   |  |
| Azerbaijan | FreshwaterFish       | 2013 | kg | 0.16   |  |
| Azerbaijan | Honey                | 2013 | kg | 0.27   |  |
| Azerbaijan | MarineFishOther      | 2013 | kg | 0.05   |  |
| Azerbaijan | MilkWhole            | 2013 | kg | 89.72  |  |
| Azerbaijan | Pigmeat              | 2013 | kg | 0.25   |  |
| Azerbaijan | PoultryMeat          | 2013 | kg | 10.52  |  |
| Bahamas    | AquaticAnimalsOthers | 2013 | kg | 0.01   |  |
| Bahamas    | AquaticPlants        | 2013 | kg | 0      |  |
| Bahamas    | BovineMeat           | 2013 | kg | 19.92  |  |
| Bahamas    | ButterGhee           | 2013 | kg | 2.4    |  |
| Bahamas    | Cephalopods          | 2013 | kg | 0.18   |  |

|            |                      |      |    |       |  |  |
|------------|----------------------|------|----|-------|--|--|
| Bahamas    | Cheese               | 2013 | kg | 10.01 |  |  |
| Bahamas    | Cream                | 2013 | kg | 0.2   |  |  |
| Bahamas    | DemersalFish         | 2013 | kg | 3.48  |  |  |
| Bahamas    | Eggs                 | 2013 | kg | 6.2   |  |  |
| Bahamas    | FreshwaterFish       | 2013 | kg | 1.05  |  |  |
| Bahamas    | Honey                | 2013 | kg | 0.46  |  |  |
| Bahamas    | MarineFishOther      | 2013 | kg | 0.82  |  |  |
| Bahamas    | MilkWhole            | 2013 | kg | 36.21 |  |  |
| Bahamas    | Pigmeat              | 2013 | kg | 32.74 |  |  |
| Bahamas    | PoultryMeat          | 2013 | kg | 45.74 |  |  |
| Bahamas    | Whey                 | 2013 | kg | 0.32  |  |  |
| Bangladesh | AquaticAnimalsOthers | 2013 | kg | 0     |  |  |
| Bangladesh | AquaticPlants        | 2013 | kg | 0     |  |  |
| Bangladesh | BovineMeat           | 2013 | kg | 1.28  |  |  |
| Bangladesh | ButterGhee           | 2013 | kg | 0.2   |  |  |
| Bangladesh | Cephalopods          | 2013 | kg | 0     |  |  |
| Bangladesh | Cheese               | 2013 | kg | 0.01  |  |  |
| Bangladesh | Cream                | 2013 | kg | 0     |  |  |
| Bangladesh | DemersalFish         | 2013 | kg | 0.6   |  |  |
| Bangladesh | Eggs                 | 2013 | kg | 2.08  |  |  |
| Bangladesh | FreshwaterFish       | 2013 | kg | 16.26 |  |  |
| Bangladesh | Honey                | 2013 | kg | 0     |  |  |
| Bangladesh | MarineFishOther      | 2013 | kg | 0.73  |  |  |
| Bangladesh | MilkWhole            | 2013 | kg | 19.01 |  |  |
| Bangladesh | Pigmeat              | 2013 | kg | 0     |  |  |
| Bangladesh | PoultryMeat          | 2013 | kg | 1.4   |  |  |
| Barbados   | AquaticPlants        | 2013 | kg | 0     |  |  |
| Barbados   | BovineMeat           | 2013 | kg | 13.13 |  |  |
| Barbados   | ButterGhee           | 2013 | kg | 0.75  |  |  |
| Barbados   | Cephalopods          | 2013 | kg | 0.32  |  |  |
| Barbados   | Cheese               | 2013 | kg | 8.68  |  |  |
| Barbados   | Cream                | 2013 | kg | 2.4   |  |  |
| Barbados   | DemersalFish         | 2013 | kg | 2.7   |  |  |
| Barbados   | Eggs                 | 2013 | kg | 9.61  |  |  |
| Barbados   | FreshwaterFish       | 2013 | kg | 0.74  |  |  |
| Barbados   | Honey                | 2013 | kg | 0.33  |  |  |
| Barbados   | MarineFishOther      | 2013 | kg | 10.49 |  |  |
| Barbados   | MilkWhole            | 2013 | kg | 39.29 |  |  |
| Barbados   | Pigmeat              | 2013 | kg | 8.3   |  |  |
| Barbados   | PoultryMeat          | 2013 | kg | 42.62 |  |  |
| Belarus    | AquaticAnimalsOthers | 2013 | kg | 0     |  |  |
| Belarus    | AquaticPlants        | 2013 | kg | 0     |  |  |
| Belarus    | BovineMeat           | 2013 | kg | 17.11 |  |  |
| Belarus    | ButterGhee           | 2013 | kg | 3.53  |  |  |
| Belarus    | Cephalopods          | 2013 | kg | 0.26  |  |  |
| Belarus    | Cheese               | 2013 | kg | 1.59  |  |  |
| Belarus    | Cream                | 2013 | kg | 0.02  |  |  |
| Belarus    | DemersalFish         | 2013 | kg | 3.32  |  |  |
| Belarus    | Eggs                 | 2013 | kg | 15.86 |  |  |
| Belarus    | FreshwaterFish       | 2013 | kg | 3.68  |  |  |
| Belarus    | Honey                | 2013 | kg | 0.33  |  |  |
| Belarus    | MarineFishOther      | 2013 | kg | 1.16  |  |  |
| Belarus    | MilkWhole            | 2013 | kg | 66.8  |  |  |
| Belarus    | Pigmeat              | 2013 | kg | 40.37 |  |  |
| Belarus    | PoultryMeat          | 2013 | kg | 31.29 |  |  |
| Belgium    | AquaticAnimalsOthers | 2013 | kg | 0.06  |  |  |

|         |                      |      |    |       |
|---------|----------------------|------|----|-------|
| Belgium | AquaticPlants        | 2013 | kg | 0     |
| Belgium | BovineMeat           | 2013 | kg | 15.63 |
| Belgium | ButterGhee           | 2013 | kg | 7     |
| Belgium | Cephalopods          | 2013 | kg | 0.25  |
| Belgium | Cheese               | 2013 | kg | 18.81 |
| Belgium | Cream                | 2013 | kg | 9.65  |
| Belgium | DemersalFish         | 2013 | kg | 7.32  |
| Belgium | Eggs                 | 2013 | kg | 12.59 |
| Belgium | FreshwaterFish       | 2013 | kg | 6.58  |
| Belgium | Honey                | 2013 | kg | 0.62  |
| Belgium | MarineFishOther      | 2013 | kg | 0.66  |
| Belgium | MilkWhole            | 2013 | kg | 67.55 |
| Belgium | Pigmeat              | 2013 | kg | 38.65 |
| Belgium | PoultryMeat          | 2013 | kg | 12.2  |
| Belize  | AquaticPlants        | 2013 | kg | 0     |
| Belize  | BovineMeat           | 2013 | kg | 4.86  |
| Belize  | ButterGhee           | 2013 | kg | 0.28  |
| Belize  | Cephalopods          | 2013 | kg | 0.03  |
| Belize  | Cheese               | 2013 | kg | 2.91  |
| Belize  | Cream                | 2013 | kg | 0.12  |
| Belize  | DemersalFish         | 2013 | kg | 1.45  |
| Belize  | Eggs                 | 2013 | kg | 4.85  |
| Belize  | FreshwaterFish       | 2013 | kg | 0.21  |
| Belize  | Honey                | 2013 | kg | 0.14  |
| Belize  | MarineFishOther      | 2013 | kg | 0.55  |
| Belize  | MilkWhole            | 2013 | kg | 36.96 |
| Belize  | Pigmeat              | 2013 | kg | 16.8  |
| Belize  | PoultryMeat          | 2013 | kg | 28.31 |
| Benin   | AquaticAnimalsOthers | 2013 | kg | 0     |
| Benin   | AquaticPlants        | 2013 | kg | 0     |
| Benin   | BovineMeat           | 2013 | kg | 3.05  |
| Benin   | ButterGhee           | 2013 | kg | 0.03  |
| Benin   | Cephalopods          | 2013 | kg | 0     |
| Benin   | Cheese               | 2013 | kg | 0.04  |
| Benin   | Cream                | 2013 | kg | 0.02  |
| Benin   | DemersalFish         | 2013 | kg | 0.52  |
| Benin   | Eggs                 | 2013 | kg | 0.9   |
| Benin   | FreshwaterFish       | 2013 | kg | 2.64  |
| Benin   | Honey                | 2013 | kg | 0     |
| Benin   | MarineFishOther      | 2013 | kg | 8.51  |
| Benin   | MilkWhole            | 2013 | kg | 6.32  |
| Benin   | Pigmeat              | 2013 | kg | 0.8   |
| Benin   | PoultryMeat          | 2013 | kg | 19.65 |
| Bermuda | AquaticPlants        | 2013 | kg | 0     |
| Bermuda | BovineMeat           | 2013 | kg | 33.15 |
| Bermuda | ButterGhee           | 2013 | kg | 3.02  |
| Bermuda | Cephalopods          | 2013 | kg | 1.38  |
| Bermuda | Cheese               | 2013 | kg | 6.98  |
| Bermuda | Cream                | 2013 | kg | 0     |
| Bermuda | DemersalFish         | 2013 | kg | 10.12 |
| Bermuda | Eggs                 | 2013 | kg | 14.92 |
| Bermuda | FreshwaterFish       | 2013 | kg | 4.84  |
| Bermuda | Honey                | 2013 | kg | 0.74  |
| Bermuda | MarineFishOther      | 2013 | kg | 9.78  |
| Bermuda | MilkWhole            | 2013 | kg | 25.76 |
| Bermuda | Pigmeat              | 2013 | kg | 28.24 |

|          |                      |      |      |       |        |
|----------|----------------------|------|------|-------|--------|
| Bermuda  | PoultryMeat          | 2013 | kg   | 32.62 |        |
| Bermuda  | Whey                 | 2013 | kg   | 0.42  |        |
| Bolivia  | AquaticAnimalsOthers |      | 2013 | kg    | 0      |
| Bolivia  | AquaticPlants        |      | 2013 | kg    | 0      |
| Bolivia  | BovineMeat           |      | 2013 | kg    | 19.78  |
| Bolivia  | ButterGhee           |      | 2013 | kg    | 0.06   |
| Bolivia  | Cephalopods          |      | 2013 | kg    | 0      |
| Bolivia  | Cheese               |      | 2013 | kg    | 1.09   |
| Bolivia  | Cream                |      | 2013 | kg    | 0.03   |
| Bolivia  | DemersalFish         |      | 2013 | kg    | 0      |
| Bolivia  | Eggs                 |      | 2013 | kg    | 5.18   |
| Bolivia  | FreshwaterFish       |      | 2013 | kg    | 0.78   |
| Bolivia  | Honey                |      | 2013 | kg    | 0.07   |
| Bolivia  | MarineFishOther      |      | 2013 | kg    | 0.91   |
| Bolivia  | MilkWhole            |      | 2013 | kg    | 38.72  |
| Bolivia  | Pigmeat              |      | 2013 | kg    | 8.89   |
| Bolivia  | PoultryMeat          |      | 2013 | kg    | 34.31  |
| BosniaH  | AquaticAnimalsOthers |      | 2013 | kg    | 0      |
| BosniaH  | AquaticPlants        |      | 2013 | kg    | 0      |
| BosniaH  | BovineMeat           |      | 2013 | kg    | 9.12   |
| BosniaH  | ButterGhee           |      | 2013 | kg    | 0.66   |
| BosniaH  | Cephalopods          |      | 2013 | kg    | 0.17   |
| BosniaH  | Cheese               |      | 2013 | kg    | 3.13   |
| BosniaH  | Cream                |      | 2013 | kg    | 0.69   |
| BosniaH  | DemersalFish         |      | 2013 | kg    | 0.97   |
| BosniaH  | Eggs                 |      | 2013 | kg    | 4.49   |
| BosniaH  | FreshwaterFish       |      | 2013 | kg    | 1.11   |
| BosniaH  | Honey                |      | 2013 | kg    | 1.01   |
| BosniaH  | MarineFishOther      |      | 2013 | kg    | 0.29   |
| BosniaH  | MilkWhole            |      | 2013 | kg    | 142.92 |
| BosniaH  | Pigmeat              |      | 2013 | kg    | 9.38   |
| BosniaH  | PoultryMeat          |      | 2013 | kg    | 13.17  |
| Botswana | AquaticAnimalsOthers |      | 2013 | kg    | 0      |
| Botswana | AquaticPlants        |      | 2013 | kg    | 0      |
| Botswana | BovineMeat           |      | 2013 | kg    | 7.85   |
| Botswana | ButterGhee           |      | 2013 | kg    | 0.72   |
| Botswana | Cephalopods          |      | 2013 | kg    | 0      |
| Botswana | Cheese               |      | 2013 | kg    | 1.49   |
| Botswana | Cream                |      | 2013 | kg    | 0.14   |
| Botswana | DemersalFish         |      | 2013 | kg    | 0.48   |
| Botswana | Eggs                 |      | 2013 | kg    | 1.95   |
| Botswana | FreshwaterFish       |      | 2013 | kg    | 0.36   |
| Botswana | Honey                |      | 2013 | kg    | 0.04   |
| Botswana | MarineFishOther      |      | 2013 | kg    | 0.21   |
| Botswana | MilkWhole            |      | 2013 | kg    | 103.61 |
| Botswana | Pigmeat              |      | 2013 | kg    | 0.74   |
| Botswana | PoultryMeat          |      | 2013 | kg    | 5.33   |
| Brazil   | AquaticAnimalsOthers |      | 2013 | kg    | 0.01   |
| Brazil   | AquaticPlants        |      | 2013 | kg    | 0      |
| Brazil   | BovineMeat           |      | 2013 | kg    | 39.25  |
| Brazil   | ButterGhee           |      | 2013 | kg    | 0.49   |
| Brazil   | Cephalopods          |      | 2013 | kg    | 0.04   |
| Brazil   | Cheese               |      | 2013 | kg    | 0.37   |
| Brazil   | Cream                |      | 2013 | kg    | 0      |
| Brazil   | DemersalFish         |      | 2013 | kg    | 3.36   |
| Brazil   | Eggs                 |      | 2013 | kg    | 8.98   |

|             |                      |      |    |        |  |
|-------------|----------------------|------|----|--------|--|
| Brazil      | FreshwaterFish       | 2013 | kg | 4.94   |  |
| Brazil      | Honey                | 2013 | kg | 0.09   |  |
| Brazil      | MarineFishOther      | 2013 | kg | 0.62   |  |
| Brazil      | MilkWhole            | 2013 | kg | 141.42 |  |
| Brazil      | Pigmeat              | 2013 | kg | 12.6   |  |
| Brazil      | PoultryMeat          | 2013 | kg | 45     |  |
| Brunei      | AquaticAnimalsOthers | 2013 | kg | 0.27   |  |
| Brunei      | AquaticPlants        | 2013 | kg | 0      |  |
| Brunei      | BovineMeat           | 2013 | kg | 12.15  |  |
| Brunei      | ButterGhee           | 2013 | kg | 1.67   |  |
| Brunei      | Cephalopods          | 2013 | kg | 2.63   |  |
| Brunei      | Cheese               | 2013 | kg | 1.61   |  |
| Brunei      | Cream                | 2013 | kg | 0.72   |  |
| Brunei      | DemersalFish         | 2013 | kg | 3.15   |  |
| Brunei      | Eggs                 | 2013 | kg | 16.16  |  |
| Brunei      | FreshwaterFish       | 2013 | kg | 3.14   |  |
| Brunei      | Honey                | 2013 | kg | 0.32   |  |
| Brunei      | MarineFishOther      | 2013 | kg | 21.71  |  |
| Brunei      | MilkWhole            | 2013 | kg | 44.38  |  |
| Brunei      | Pigmeat              | 2013 | kg | 8.35   |  |
| Brunei      | PoultryMeat          | 2013 | kg | 62.87  |  |
| Bulgaria    | AquaticAnimalsOthers | 2013 | kg | 0.02   |  |
| Bulgaria    | AquaticPlants        | 2013 | kg | 0      |  |
| Bulgaria    | BovineMeat           | 2013 | kg | 3.84   |  |
| Bulgaria    | ButterGhee           | 2013 | kg | 0.75   |  |
| Bulgaria    | Cephalopods          | 2013 | kg | 0.1    |  |
| Bulgaria    | Cheese               | 2013 | kg | 9.59   |  |
| Bulgaria    | Cream                | 2013 | kg | 0.01   |  |
| Bulgaria    | DemersalFish         | 2013 | kg | 0.81   |  |
| Bulgaria    | Eggs                 | 2013 | kg | 8.36   |  |
| Bulgaria    | FreshwaterFish       | 2013 | kg | 2.6    |  |
| Bulgaria    | Honey                | 2013 | kg | 0      |  |
| Bulgaria    | MarineFishOther      | 2013 | kg | 0.13   |  |
| Bulgaria    | MilkWhole            | 2013 | kg | 78.95  |  |
| Bulgaria    | Pigmeat              | 2013 | kg | 26.26  |  |
| Bulgaria    | PoultryMeat          | 2013 | kg | 20.68  |  |
| Bulgaria    | Whey                 | 2013 | kg | 0      |  |
| BurkinaFaso | AquaticPlants        | 2013 | kg | 0      |  |
| BurkinaFaso | BovineMeat           | 2013 | kg | 4.48   |  |
| BurkinaFaso | ButterGhee           | 2013 | kg | 0.09   |  |
| BurkinaFaso | Cephalopods          | 2013 | kg | 0      |  |
| BurkinaFaso | Cheese               | 2013 | kg | 0.01   |  |
| BurkinaFaso | Cream                | 2013 | kg | 0      |  |
| BurkinaFaso | DemersalFish         | 2013 | kg | 0      |  |
| BurkinaFaso | Eggs                 | 2013 | kg | 2.61   |  |
| BurkinaFaso | FreshwaterFish       | 2013 | kg | 1.04   |  |
| BurkinaFaso | Honey                | 2013 | kg | 0      |  |
| BurkinaFaso | MarineFishOther      | 2013 | kg | 2.93   |  |
| BurkinaFaso | MilkWhole            | 2013 | kg | 27.24  |  |
| BurkinaFaso | Pigmeat              | 2013 | kg | 1.93   |  |
| BurkinaFaso | PoultryMeat          | 2013 | kg | 2.26   |  |
| BurkinaFaso | Whey                 | 2013 | kg | 0.05   |  |
| CaboVerde   | AquaticAnimalsOthers | 2013 | kg | 0      |  |
| CaboVerde   | AquaticPlants        | 2013 | kg | 0      |  |
| CaboVerde   | BovineMeat           | 2013 | kg | 2      |  |
| CaboVerde   | ButterGhee           | 2013 | kg | 0.17   |  |

|           |                      |      |      |       |      |
|-----------|----------------------|------|------|-------|------|
| CaboVerde | Cephalopods          | 2013 | kg   | 0.26  |      |
| CaboVerde | Cheese               | 2013 | kg   | 1.24  |      |
| CaboVerde | Cream                | 2013 | kg   | 0     |      |
| CaboVerde | DemersalFish         | 2013 | kg   | 2.95  |      |
| CaboVerde | Eggs                 | 2013 | kg   | 5.08  |      |
| CaboVerde | FreshwaterFish       | 2013 | kg   | 0.04  |      |
| CaboVerde | Honey                | 2013 | kg   | 0.04  |      |
| CaboVerde | MarineFishOther      | 2013 | kg   | 1.73  |      |
| CaboVerde | MilkWhole            | 2013 | kg   | 95.58 |      |
| CaboVerde | Pigmeat              | 2013 | kg   | 12.04 |      |
| CaboVerde | PoultryMeat          | 2013 | kg   | 18.95 |      |
| CaboVerde | Whey                 | 2013 | kg   | 0     |      |
| Cambodia  | AquaticAnimalsOthers |      | 2013 | kg    | 0.01 |
| Cambodia  | AquaticPlants        | 2013 | kg   | 0     |      |
| Cambodia  | BovineMeat           | 2013 | kg   | 4.85  |      |
| Cambodia  | ButterGhee           | 2013 | kg   | 0.03  |      |
| Cambodia  | Cephalopods          | 2013 | kg   | 0.45  |      |
| Cambodia  | Cheese               | 2013 | kg   | 0.02  |      |
| Cambodia  | Cream                | 2013 | kg   | 0     |      |
| Cambodia  | DemersalFish         | 2013 | kg   | 0.02  |      |
| Cambodia  | Eggs                 | 2013 | kg   | 1.37  |      |
| Cambodia  | FreshwaterFish       | 2013 | kg   | 34    |      |
| Cambodia  | Honey                | 2013 | kg   | 0     |      |
| Cambodia  | MarineFishOther      | 2013 | kg   | 5.46  |      |
| Cambodia  | MilkWhole            | 2013 | kg   | 2.25  |      |
| Cambodia  | Pigmeat              | 2013 | kg   | 6.52  |      |
| Cambodia  | PoultryMeat          | 2013 | kg   | 1.84  |      |
| Cambodia  | Whey                 | 2013 | kg   | 0     |      |
| Cameroon  | AquaticAnimalsOthers |      | 2013 | kg    | 0    |
| Cameroon  | AquaticPlants        | 2013 | kg   | 0     |      |
| Cameroon  | BovineMeat           | 2013 | kg   | 4.17  |      |
| Cameroon  | ButterGhee           | 2013 | kg   | 0.01  |      |
| Cameroon  | Cephalopods          | 2013 | kg   | 0     |      |
| Cameroon  | Cheese               | 2013 | kg   | 0.02  |      |
| Cameroon  | Cream                | 2013 | kg   | 0.01  |      |
| Cameroon  | DemersalFish         | 2013 | kg   | 2.47  |      |
| Cameroon  | Eggs                 | 2013 | kg   | 0.4   |      |
| Cameroon  | FreshwaterFish       | 2013 | kg   | 3.92  |      |
| Cameroon  | Honey                | 2013 | kg   | 0.2   |      |
| Cameroon  | MarineFishOther      | 2013 | kg   | 1.84  |      |
| Cameroon  | MilkWhole            | 2013 | kg   | 14.87 |      |
| Cameroon  | Pigmeat              | 2013 | kg   | 1.47  |      |
| Cameroon  | PoultryMeat          | 2013 | kg   | 3.29  |      |
| Cameroon  | Whey                 | 2013 | kg   | 0.06  |      |
| Canada    | AquaticAnimalsOthers |      | 2013 | kg    | 0.09 |
| Canada    | AquaticPlants        | 2013 | kg   | 0     |      |
| Canada    | BovineMeat           | 2013 | kg   | 30.25 |      |
| Canada    | ButterGhee           | 2013 | kg   | 2.7   |      |
| Canada    | Cephalopods          | 2013 | kg   | 0.06  |      |
| Canada    | Cheese               | 2013 | kg   | 12    |      |
| Canada    | Cream                | 2013 | kg   | 9.77  |      |
| Canada    | DemersalFish         | 2013 | kg   | 4.81  |      |
| Canada    | Eggs                 | 2013 | kg   | 12.95 |      |
| Canada    | FreshwaterFish       | 2013 | kg   | 5.08  |      |
| Canada    | Honey                | 2013 | kg   | 0.79  |      |
| Canada    | MarineFishOther      | 2013 | kg   | 0.15  |      |



|                        |                      |      |    |       |  |  |
|------------------------|----------------------|------|----|-------|--|--|
| Canada                 | MeatAquaticMammals   | 2013 | kg | 0     |  |  |
| Canada                 | MilkWhole            | 2013 | kg | 21.19 |  |  |
| Canada                 | Pigmeat              | 2013 | kg | 22.81 |  |  |
| Canada                 | PoultryMeat          | 2013 | kg | 36.68 |  |  |
| Canada                 | Whey                 | 2013 | kg | 9.19  |  |  |
| CentralAfricanRepublic | AquaticPlants        | 2013 | kg | 0     |  |  |
| CentralAfricanRepublic | BovineMeat           | 2013 | kg | 11.92 |  |  |
| CentralAfricanRepublic | ButterGhee           | 2013 | kg | 0     |  |  |
| CentralAfricanRepublic | Cephalopods          | 2013 | kg | 0     |  |  |
| CentralAfricanRepublic | Cheese               | 2013 | kg | 0     |  |  |
| CentralAfricanRepublic | Cream                | 2013 | kg | 0     |  |  |
| CentralAfricanRepublic | DemersalFish         | 2013 | kg | 0     |  |  |
| CentralAfricanRepublic | Eggs                 | 2013 | kg | 0.47  |  |  |
| CentralAfricanRepublic | FreshwaterFish       | 2013 | kg | 6.53  |  |  |
| CentralAfricanRepublic | Honey                | 2013 | kg | 3.51  |  |  |
| CentralAfricanRepublic | MarineFishOther      | 2013 | kg | 0.17  |  |  |
| CentralAfricanRepublic | MilkWhole            | 2013 | kg | 13.05 |  |  |
| CentralAfricanRepublic | Pigmeat              | 2013 | kg | 3.7   |  |  |
| CentralAfricanRepublic | PoultryMeat          | 2013 | kg | 1.45  |  |  |
| Chad                   | AquaticAnimalsOthers | 2013 | kg | 0     |  |  |
| Chad                   | BovineMeat           | 2013 | kg | 7.67  |  |  |
| Chad                   | ButterGhee           | 2013 | kg | 0.04  |  |  |
| Chad                   | Cephalopods          | 2013 | kg | 0     |  |  |
| Chad                   | Cheese               | 2013 | kg | 0     |  |  |
| Chad                   | DemersalFish         | 2013 | kg | 0     |  |  |
| Chad                   | Eggs                 | 2013 | kg | 0.24  |  |  |
| Chad                   | FreshwaterFish       | 2013 | kg | 4.67  |  |  |
| Chad                   | Honey                | 2013 | kg | 0.08  |  |  |
| Chad                   | MarineFishOther      | 2013 | kg | 0     |  |  |
| Chad                   | MilkWhole            | 2013 | kg | 20.47 |  |  |
| Chad                   | Pigmeat              | 2013 | kg | 0.05  |  |  |
| Chad                   | PoultryMeat          | 2013 | kg | 0.42  |  |  |
| Chile                  | AquaticAnimalsOthers | 2013 | kg | 0.72  |  |  |
| Chile                  | AquaticPlants        | 2013 | kg | 0     |  |  |
| Chile                  | BovineMeat           | 2013 | kg | 23.86 |  |  |
| Chile                  | ButterGhee           | 2013 | kg | 1.24  |  |  |
| Chile                  | Cephalopods          | 2013 | kg | 1.74  |  |  |
| Chile                  | Cheese               | 2013 | kg | 6.32  |  |  |
| Chile                  | Cream                | 2013 | kg | 0.07  |  |  |
| Chile                  | DemersalFish         | 2013 | kg | 3.31  |  |  |
| Chile                  | Eggs                 | 2013 | kg | 9.97  |  |  |
| Chile                  | FreshwaterFish       | 2013 | kg | 0.62  |  |  |
| Chile                  | Honey                | 2013 | kg | 0.16  |  |  |
| Chile                  | MarineFishOther      | 2013 | kg | 0.02  |  |  |
| Chile                  | MeatAquaticMammals   | 2013 | kg | 0     |  |  |
| Chile                  | MilkWhole            | 2013 | kg | 45.13 |  |  |
| Chile                  | Pigmeat              | 2013 | kg | 24.68 |  |  |
| Chile                  | PoultryMeat          | 2013 | kg | 36.52 |  |  |
| Chile                  | Whey                 | 2013 | kg | 0.13  |  |  |
| HongKong               | AquaticAnimalsOthers | 2013 | kg | 0.34  |  |  |
| HongKong               | AquaticPlants        | 2013 | kg | 0     |  |  |
| HongKong               | BovineMeat           | 2013 | kg | 25.82 |  |  |
| HongKong               | ButterGhee           | 2013 | kg | 1.24  |  |  |
| HongKong               | Cephalopods          | 2013 | kg | 3.05  |  |  |
| HongKong               | Cheese               | 2013 | kg | 1.83  |  |  |
| HongKong               | Cream                | 2013 | kg | 0.19  |  |  |

|                       |                      |      |    |       |  |  |
|-----------------------|----------------------|------|----|-------|--|--|
| HongKong              | DemersalFish         | 2013 | kg | 7.42  |  |  |
| HongKong              | Eggs                 | 2013 | kg | 14.5  |  |  |
| HongKong              | FreshwaterFish       | 2013 | kg | 10.11 |  |  |
| HongKong              | Honey                | 2013 | kg | 0.41  |  |  |
| HongKong              | MarineFishOther      | 2013 | kg | 22.34 |  |  |
| HongKong              | MilkWhole            | 2013 | kg | 81.05 |  |  |
| HongKong              | Pigmeat              | 2013 | kg | 67.11 |  |  |
| HongKong              | PoultryMeat          | 2013 | kg | 54.86 |  |  |
| ChinaMacaoSAR         | AquaticAnimalsOthers | 2013 | kg | 0.21  |  |  |
| ChinaMacaoSAR         | AquaticPlants        | 2013 | kg | 0     |  |  |
| ChinaMacaoSAR         | BovineMeat           | 2013 | kg | 10.4  |  |  |
| ChinaMacaoSAR         | ButterGhee           | 2013 | kg | 0.87  |  |  |
| ChinaMacaoSAR         | Cephalopods          | 2013 | kg | 2.19  |  |  |
| ChinaMacaoSAR         | Cheese               | 2013 | kg | 0.96  |  |  |
| ChinaMacaoSAR         | Cream                | 2013 | kg | 1.24  |  |  |
| ChinaMacaoSAR         | DemersalFish         | 2013 | kg | 1.1   |  |  |
| ChinaMacaoSAR         | Eggs                 | 2013 | kg | 14.95 |  |  |
| ChinaMacaoSAR         | FreshwaterFish       | 2013 | kg | 12.8  |  |  |
| ChinaMacaoSAR         | Honey                | 2013 | kg | 0.14  |  |  |
| ChinaMacaoSAR         | MarineFishOther      | 2013 | kg | 17.48 |  |  |
| ChinaMacaoSAR         | MilkWhole            | 2013 | kg | 28.6  |  |  |
| ChinaMacaoSAR         | Pigmeat              | 2013 | kg | 71.48 |  |  |
| ChinaMacaoSAR         | PoultryMeat          | 2013 | kg | 36.26 |  |  |
| ChinaMacaoSAR         | Whey                 | 2013 | kg | 0     |  |  |
| China                 | AquaticAnimalsOthers | 2013 | kg | 0.68  |  |  |
| China                 | AquaticPlants        | 2013 | kg | 9.44  |  |  |
| China                 | BovineMeat           | 2013 | kg | 5.12  |  |  |
| China                 | ButterGhee           | 2013 | kg | 0.11  |  |  |
| China                 | Cephalopods          | 2013 | kg | 0.74  |  |  |
| China                 | Cheese               | 2013 | kg | 0.22  |  |  |
| China                 | Cream                | 2013 | kg | 0     |  |  |
| China                 | DemersalFish         | 2013 | kg | 3.37  |  |  |
| China                 | Eggs                 | 2013 | kg | 18.76 |  |  |
| China                 | FreshwaterFish       | 2013 | kg | 16.04 |  |  |
| China                 | Honey                | 2013 | kg | 0.24  |  |  |
| China                 | MarineFishOther      | 2013 | kg | 1.29  |  |  |
| China                 | MilkWhole            | 2013 | kg | 29.39 |  |  |
| China                 | Pigmeat              | 2013 | kg | 38.43 |  |  |
| China                 | PoultryMeat          | 2013 | kg | 13.2  |  |  |
| ChinaTaiwanProvinceof | AquaticAnimalsOthers | 2013 | kg | 0.4   |  |  |
| ChinaTaiwanProvinceof | AquaticPlants        | 2013 | kg | 0     |  |  |
| ChinaTaiwanProvinceof | BovineMeat           | 2013 | kg | 5.21  |  |  |
| ChinaTaiwanProvinceof | ButterGhee           | 2013 | kg | 0.74  |  |  |
| ChinaTaiwanProvinceof | Cephalopods          | 2013 | kg | 5.19  |  |  |
| ChinaTaiwanProvinceof | Cheese               | 2013 | kg | 0.97  |  |  |
| ChinaTaiwanProvinceof | Cream                | 2013 | kg | 0.3   |  |  |
| ChinaTaiwanProvinceof | DemersalFish         | 2013 | kg | 3.83  |  |  |
| ChinaTaiwanProvinceof | Eggs                 | 2013 | kg | 13.08 |  |  |
| ChinaTaiwanProvinceof | FreshwaterFish       | 2013 | kg | 7.3   |  |  |
| ChinaTaiwanProvinceof | Honey                | 2013 | kg | 0.72  |  |  |
| ChinaTaiwanProvinceof | MarineFishOther      | 2013 | kg | 3.09  |  |  |
| ChinaTaiwanProvinceof | MilkWhole            | 2013 | kg | 26.12 |  |  |
| ChinaTaiwanProvinceof | Pigmeat              | 2013 | kg | 39.37 |  |  |
| ChinaTaiwanProvinceof | PoultryMeat          | 2013 | kg | 32.13 |  |  |
| Colombia              | AquaticAnimalsOthers | 2013 | kg | 0     |  |  |
| Colombia              | AquaticPlants        | 2013 | kg | 0     |  |  |

|           |                      |      |    |        |  |
|-----------|----------------------|------|----|--------|--|
| Colombia  | BovineMeat           | 2013 | kg | 16.36  |  |
| Colombia  | ButterGhee           | 2013 | kg | 0.43   |  |
| Colombia  | Cephalopods          | 2013 | kg | 0.09   |  |
| Colombia  | Cheese               | 2013 | kg | 1.24   |  |
| Colombia  | Cream                | 2013 | kg | 0.02   |  |
| Colombia  | DemersalFish         | 2013 | kg | 0.12   |  |
| Colombia  | Eggs                 | 2013 | kg | 10.78  |  |
| Colombia  | FreshwaterFish       | 2013 | kg | 3.14   |  |
| Colombia  | Honey                | 2013 | kg | 0.04   |  |
| Colombia  | MarineFishOther      | 2013 | kg | 0.15   |  |
| Colombia  | MilkWhole            | 2013 | kg | 99.26  |  |
| Colombia  | Pigmeat              | 2013 | kg | 6.51   |  |
| Colombia  | PoultryMeat          | 2013 | kg | 27.57  |  |
| Congo     | AquaticAnimalsOthers | 2013 | kg | 0      |  |
| Congo     | AquaticPlants        | 2013 | kg | 0      |  |
| Congo     | BovineMeat           | 2013 | kg | 4.35   |  |
| Congo     | ButterGhee           | 2013 | kg | 0.04   |  |
| Congo     | Cephalopods          | 2013 | kg | 0.02   |  |
| Congo     | Cheese               | 2013 | kg | 0.08   |  |
| Congo     | Cream                | 2013 | kg | 0.02   |  |
| Congo     | DemersalFish         | 2013 | kg | 7.77   |  |
| Congo     | Eggs                 | 2013 | kg | 0.6    |  |
| Congo     | FreshwaterFish       | 2013 | kg | 8.18   |  |
| Congo     | Honey                | 2013 | kg | 0.01   |  |
| Congo     | MarineFishOther      | 2013 | kg | 1.11   |  |
| Congo     | MilkWhole            | 2013 | kg | 9.29   |  |
| Congo     | Pigmeat              | 2013 | kg | 2.39   |  |
| Congo     | PoultryMeat          | 2013 | kg | 13.02  |  |
| CostaRica | AquaticAnimalsOthers | 2013 | kg | 0.02   |  |
| CostaRica | AquaticPlants        | 2013 | kg | 0      |  |
| CostaRica | BovineMeat           | 2013 | kg | 15.23  |  |
| CostaRica | ButterGhee           | 2013 | kg | 1.33   |  |
| CostaRica | Cephalopods          | 2013 | kg | 0.29   |  |
| CostaRica | Cheese               | 2013 | kg | 2.97   |  |
| CostaRica | DemersalFish         | 2013 | kg | 0.6    |  |
| CostaRica | Eggs                 | 2013 | kg | 10.55  |  |
| CostaRica | FreshwaterFish       | 2013 | kg | 5.97   |  |
| CostaRica | Honey                | 2013 | kg | 0.26   |  |
| CostaRica | MarineFishOther      | 2013 | kg | 0.6    |  |
| CostaRica | MilkWhole            | 2013 | kg | 151.89 |  |
| CostaRica | Pigmeat              | 2013 | kg | 10.28  |  |
| CostaRica | PoultryMeat          | 2013 | kg | 24.47  |  |
| Ivorycote | AquaticAnimalsOthers | 2013 | kg | 0      |  |
| IvoryCoa  | AquaticPlants        | 2013 | kg | 0      |  |
| IvoryCoa  | BovineMeat           | 2013 | kg | 1.7    |  |
| IvoryCoa  | ButterGhee           | 2013 | kg | 0.02   |  |
| IvoryCoa  | Cephalopods          | 2013 | kg | 0      |  |
| IvoryCoa  | Cheese               | 2013 | kg | 0.04   |  |
| IvoryCoa  | Cream                | 2013 | kg | 0.06   |  |
| IvoryCoa  | DemersalFish         | 2013 | kg | 0.33   |  |
| IvoryCoa  | Eggs                 | 2013 | kg | 1.95   |  |
| IvoryCoa  | FreshwaterFish       | 2013 | kg | 0.54   |  |
| IvoryCoa  | Honey                | 2013 | kg | 0.03   |  |
| IvoryCoa  | MarineFishOther      | 2013 | kg | 8.01   |  |
| IvoryCoa  | MilkWhole            | 2013 | kg | 5.28   |  |
| IvoryCoa  | Pigmeat              | 2013 | kg | 1.76   |  |

|          |                      |      |      |      |        |
|----------|----------------------|------|------|------|--------|
| IvoryCoa | PoultryMeat          | 2013 | kg   | 2.4  |        |
| IvoryCoa | Whey                 | 2013 | kg   | 0.91 |        |
| Croatia  | AquaticAnimalsOthers |      | 2013 | kg   | 0.08   |
| Croatia  | AquaticPlants        |      | 2013 | kg   | 0      |
| Croatia  | BovineMeat           |      | 2013 | kg   | 12.41  |
| Croatia  | ButterGhee           |      | 2013 | kg   | 1.19   |
| Croatia  | Cephalopods          |      | 2013 | kg   | 1.87   |
| Croatia  | Cheese               |      | 2013 | kg   | 10.4   |
| Croatia  | Cream                |      | 2013 | kg   | 0      |
| Croatia  | DemersalFish         |      | 2013 | kg   | 3.7    |
| Croatia  | Eggs                 |      | 2013 | kg   | 8.48   |
| Croatia  | FreshwaterFish       |      | 2013 | kg   | 1.39   |
| Croatia  | Honey                |      | 2013 | kg   | 0.7    |
| Croatia  | MarineFishOther      |      | 2013 | kg   | 1.26   |
| Croatia  | MilkWhole            |      | 2013 | kg   | 113.76 |
| Croatia  | Pigmeat              |      | 2013 | kg   | 42.79  |
| Croatia  | PoultryMeat          |      | 2013 | kg   | 8.52   |
| Cuba     | AquaticAnimalsOthers |      | 2013 | kg   | 0      |
| Cuba     | AquaticPlants        |      | 2013 | kg   | 0      |
| Cuba     | BovineMeat           |      | 2013 | kg   | 6.39   |
| Cuba     | ButterGhee           |      | 2013 | kg   | 0.26   |
| Cuba     | Cephalopods          |      | 2013 | kg   | 0.05   |
| Cuba     | Cheese               |      | 2013 | kg   | 1.47   |
| Cuba     | Cream                |      | 2013 | kg   | 0      |
| Cuba     | DemersalFish         |      | 2013 | kg   | 0.89   |
| Cuba     | Eggs                 |      | 2013 | kg   | 9.82   |
| Cuba     | FreshwaterFish       |      | 2013 | kg   | 2.37   |
| Cuba     | Honey                |      | 2013 | kg   | 0.13   |
| Cuba     | MarineFishOther      |      | 2013 | kg   | 0.34   |
| Cuba     | MilkWhole            |      | 2013 | kg   | 74.94  |
| Cuba     | Pigmeat              |      | 2013 | kg   | 19.82  |
| Cuba     | PoultryMeat          |      | 2013 | kg   | 20.15  |
| Cuba     | Whey                 |      | 2013 | kg   | 0      |
| Cyprus   | AquaticAnimalsOthers |      | 2013 | kg   | 0.19   |
| Cyprus   | AquaticPlants        |      | 2013 | kg   | 0      |
| Cyprus   | BovineMeat           |      | 2013 | kg   | 5.79   |
| Cyprus   | ButterGhee           |      | 2013 | kg   | 0.94   |
| Cyprus   | Cephalopods          |      | 2013 | kg   | 3.1    |
| Cyprus   | Cheese               |      | 2013 | kg   | 3.35   |
| Cyprus   | Cream                |      | 2013 | kg   | 0      |
| Cyprus   | DemersalFish         |      | 2013 | kg   | 4.33   |
| Cyprus   | Eggs                 |      | 2013 | kg   | 8.98   |
| Cyprus   | FreshwaterFish       |      | 2013 | kg   | 5.76   |
| Cyprus   | Honey                |      | 2013 | kg   | 0.61   |
| Cyprus   | MarineFishOther      |      | 2013 | kg   | 0.61   |
| Cyprus   | MilkWhole            |      | 2013 | kg   | 83.55  |
| Cyprus   | Pigmeat              |      | 2013 | kg   | 38.38  |
| Cyprus   | PoultryMeat          |      | 2013 | kg   | 24.45  |
| Czechia  | AquaticAnimalsOthers |      | 2013 | kg   | 0      |
| Czechia  | AquaticPlants        |      | 2013 | kg   | 0      |
| Czechia  | BovineMeat           |      | 2013 | kg   | 8.15   |
| Czechia  | ButterGhee           |      | 2013 | kg   | 5.15   |
| Czechia  | Cephalopods          |      | 2013 | kg   | 0.03   |
| Czechia  | Cheese               |      | 2013 | kg   | 16.14  |
| Czechia  | Cream                |      | 2013 | kg   | 4.06   |
| Czechia  | DemersalFish         |      | 2013 | kg   | 2.06   |

|          |                      |      |    |       |  |
|----------|----------------------|------|----|-------|--|
| Czechia  | Eggs                 | 2013 | kg | 11.66 |  |
| Czechia  | FreshwaterFish       | 2013 | kg | 2.96  |  |
| Czechia  | Honey                | 2013 | kg | 0.8   |  |
| Czechia  | MarineFishOther      | 2013 | kg | 0.56  |  |
| Czechia  | MilkWhole            | 2013 | kg | 31.71 |  |
| Czechia  | Pigmeat              | 2013 | kg | 41.17 |  |
| Czechia  | PoultryMeat          | 2013 | kg | 19.09 |  |
| Nkorea   | AquaticAnimalsOthers | 2013 | kg | 0.01  |  |
| Nkorea   | AquaticPlants        | 2013 | kg | 0     |  |
| Nkorea   | BovineMeat           | 2013 | kg | 0.88  |  |
| Nkorea   | ButterGhee           | 2013 | kg | 0.01  |  |
| Nkorea   | Cephalopods          | 2013 | kg | 0.43  |  |
| Nkorea   | DemersalFish         | 2013 | kg | 3.51  |  |
| Nkorea   | Eggs                 | 2013 | kg | 4.68  |  |
| Nkorea   | FreshwaterFish       | 2013 | kg | 0.38  |  |
| Nkorea   | MarineFishOther      | 2013 | kg | 4.08  |  |
| Nkorea   | MilkWhole            | 2013 | kg | 3.74  |  |
| Nkorea   | Pigmeat              | 2013 | kg | 4.7   |  |
| Nkorea   | PoultryMeat          | 2013 | kg | 1.76  |  |
| Denmark  | AquaticAnimalsOthers | 2013 | kg | 0.02  |  |
| Denmark  | AquaticPlants        | 2013 | kg | 0     |  |
| Denmark  | BovineMeat           | 2013 | kg | 28.46 |  |
| Denmark  | ButterGhee           | 2013 | kg | 1.78  |  |
| Denmark  | Cephalopods          | 2013 | kg | 0.05  |  |
| Denmark  | Cheese               | 2013 | kg | 19.83 |  |
| Denmark  | Cream                | 2013 | kg | 9.14  |  |
| Denmark  | DemersalFish         | 2013 | kg | 5.06  |  |
| Denmark  | Eggs                 | 2013 | kg | 15.35 |  |
| Denmark  | FreshwaterFish       | 2013 | kg | 0.75  |  |
| Denmark  | Honey                | 2013 | kg | 0.71  |  |
| Denmark  | MarineFishOther      | 2013 | kg | 0.06  |  |
| Denmark  | MilkWhole            | 2013 | kg | 47.65 |  |
| Denmark  | Pigmeat              | 2013 | kg | 24.87 |  |
| Denmark  | PoultryMeat          | 2013 | kg | 26.75 |  |
| Denmark  | Whey                 | 2013 | kg | 9.09  |  |
| Djibouti | AquaticAnimalsOthers | 2013 | kg | 0     |  |
| Djibouti | AquaticPlants        | 2013 | kg | 0     |  |
| Djibouti | BovineMeat           | 2013 | kg | 10    |  |
| Djibouti | ButterGhee           | 2013 | kg | 0.12  |  |
| Djibouti | Cephalopods          | 2013 | kg | 0     |  |
| Djibouti | Cheese               | 2013 | kg | 0.16  |  |
| Djibouti | Cream                | 2013 | kg | 0.04  |  |
| Djibouti | DemersalFish         | 2013 | kg | 0.64  |  |
| Djibouti | Eggs                 | 2013 | kg | 0.7   |  |
| Djibouti | FreshwaterFish       | 2013 | kg | 0.01  |  |
| Djibouti | Honey                | 2013 | kg | 0.02  |  |
| Djibouti | MarineFishOther      | 2013 | kg | 0.39  |  |
| Djibouti | MilkWhole            | 2013 | kg | 58.72 |  |
| Djibouti | Pigmeat              | 2013 | kg | 0.17  |  |
| Djibouti | PoultryMeat          | 2013 | kg | 2.05  |  |
| Dominica | AquaticAnimalsOthers | 2013 | kg | 0     |  |
| Dominica | AquaticPlants        | 2013 | kg | 0     |  |
| Dominica | BovineMeat           | 2013 | kg | 8.72  |  |
| Dominica | ButterGhee           | 2013 | kg | 0.07  |  |
| Dominica | Cephalopods          | 2013 | kg | 0.01  |  |
| Dominica | Cheese               | 2013 | kg | 3.16  |  |

|          |                      |      |    |       |  |
|----------|----------------------|------|----|-------|--|
| Dominica | Cream                | 2013 | kg | 0.08  |  |
| Dominica | DemersalFish         | 2013 | kg | 3.87  |  |
| Dominica | Eggs                 | 2013 | kg | 2.53  |  |
| Dominica | FreshwaterFish       | 2013 | kg | 0.12  |  |
| Dominica | Honey                | 2013 | kg | 0     |  |
| Dominica | MarineFishOther      | 2013 | kg | 3.39  |  |
| Dominica | MilkWhole            | 2013 | kg | 88.33 |  |
| Dominica | Pigmeat              | 2013 | kg | 10.88 |  |
| Dominica | PoultryMeat          | 2013 | kg | 31.2  |  |
| Dominica | Whey                 | 2013 | kg | 0     |  |
| Dominr   | AquaticAnimalsOthers | 2013 | kg | 0     |  |
| Dominr   | AquaticPlants        | 2013 | kg | 0     |  |
| Dominr   | BovineMeat           | 2013 | kg | 9.88  |  |
| Dominr   | ButterGhee           | 2013 | kg | 0.27  |  |
| Dominr   | Cephalopods          | 2013 | kg | 0.1   |  |
| Dominr   | Cheese               | 2013 | kg | 1.07  |  |
| Dominr   | DemersalFish         | 2013 | kg | 3.22  |  |
| Dominr   | Eggs                 | 2013 | kg | 7.19  |  |
| Dominr   | FreshwaterFish       | 2013 | kg | 0.34  |  |
| Dominr   | Honey                | 2013 | kg | 0.42  |  |
| Dominr   | MarineFishOther      | 2013 | kg | 0.44  |  |
| Dominr   | MilkWhole            | 2013 | kg | 53.73 |  |
| Dominr   | Pigmeat              | 2013 | kg | 9.51  |  |
| Dominr   | PoultryMeat          | 2013 | kg | 27.56 |  |
| Ecuador  | AquaticAnimalsOthers | 2013 | kg | 0     |  |
| Ecuador  | AquaticPlants        | 2013 | kg | 0     |  |
| Ecuador  | BovineMeat           | 2013 | kg | 16.61 |  |
| Ecuador  | ButterGhee           | 2013 | kg | 0.15  |  |
| Ecuador  | Cephalopods          | 2013 | kg | 0.02  |  |
| Ecuador  | Cheese               | 2013 | kg | 6.19  |  |
| Ecuador  | Cream                | 2013 | kg | 0.19  |  |
| Ecuador  | DemersalFish         | 2013 | kg | 0.3   |  |
| Ecuador  | Eggs                 | 2013 | kg | 8.01  |  |
| Ecuador  | FreshwaterFish       | 2013 | kg | 1.49  |  |
| Ecuador  | Honey                | 2013 | kg | 0.07  |  |
| Ecuador  | MarineFishOther      | 2013 | kg | 0.3   |  |
| Ecuador  | MilkWhole            | 2013 | kg | 92.08 |  |
| Ecuador  | Pigmeat              | 2013 | kg | 14.44 |  |
| Ecuador  | PoultryMeat          | 2013 | kg | 21.85 |  |
| Ecuador  | Whey                 | 2013 | kg | 0.03  |  |
| Egypt    | AquaticAnimalsOthers | 2013 | kg | 0     |  |
| Egypt    | AquaticPlants        | 2013 | kg | 0     |  |
| Egypt    | BovineMeat           | 2013 | kg | 12.88 |  |
| Egypt    | ButterGhee           | 2013 | kg | 1.96  |  |
| Egypt    | Cephalopods          | 2013 | kg | 0.15  |  |
| Egypt    | Cheese               | 2013 | kg | 6.91  |  |
| Egypt    | Cream                | 2013 | kg | 0.04  |  |
| Egypt    | DemersalFish         | 2013 | kg | 3.64  |  |
| Egypt    | Eggs                 | 2013 | kg | 4.59  |  |
| Egypt    | FreshwaterFish       | 2013 | kg | 13.92 |  |
| Egypt    | Honey                | 2013 | kg | 0.05  |  |
| Egypt    | MarineFishOther      | 2013 | kg | 0.32  |  |
| Egypt    | MilkWhole            | 2013 | kg | 21.52 |  |
| Egypt    | Pigmeat              | 2013 | kg | 0.02  |  |
| Egypt    | PoultryMeat          | 2013 | kg | 14.43 |  |
| Egypt    | Whey                 | 2013 | kg | 2.6   |  |

|             |                |        |      |    |       |
|-------------|----------------|--------|------|----|-------|
| El Salvador | AquaticAnimals | Others | 2013 | kg | 0     |
| El Salvador | AquaticPlants  |        | 2013 | kg | 0     |
| El Salvador | BovineMeat     |        | 2013 | kg | 5.95  |
| El Salvador | ButterGhee     |        | 2013 | kg | 0.09  |
| El Salvador | Cephalopods    |        | 2013 | kg | 0.03  |
| El Salvador | Cheese         |        | 2013 | kg | 5.19  |
| El Salvador | Cream          |        | 2013 | kg | 0.01  |
| El Salvador | DemersalFish   |        | 2013 | kg | 0.01  |
| El Salvador | Eggs           |        | 2013 | kg | 9.51  |
| El Salvador | FreshwaterFish |        | 2013 | kg | 0.97  |
| El Salvador | Honey          |        | 2013 | kg | 0.01  |
| El Salvador | MarineFish     | Other  | 2013 | kg | 2.14  |
| El Salvador | Milk           | Whole  | 2013 | kg | 78.44 |
| El Salvador | Pigmeat        |        | 2013 | kg | 3.23  |
| El Salvador | PoultryMeat    |        | 2013 | kg | 19.84 |
| Estonia     | AquaticAnimals | Others | 2013 | kg | 0     |
| Estonia     | AquaticPlants  |        | 2013 | kg | 0     |
| Estonia     | BovineMeat     |        | 2013 | kg | 7.19  |
| Estonia     | ButterGhee     |        | 2013 | kg | 1.63  |
| Estonia     | Cephalopods    |        | 2013 | kg | 0.4   |
| Estonia     | Cheese         |        | 2013 | kg | 7.98  |
| Estonia     | Cream          |        | 2013 | kg | 1.74  |
| Estonia     | DemersalFish   |        | 2013 | kg | 7.37  |
| Estonia     | Eggs           |        | 2013 | kg | 12.66 |
| Estonia     | FreshwaterFish |        | 2013 | kg | 2.59  |
| Estonia     | Honey          |        | 2013 | kg | 0.9   |
| Estonia     | MarineFish     | Other  | 2013 | kg | 0.05  |
| Estonia     | Milk           | Whole  | 2013 | kg | 165.8 |
| Estonia     | Pigmeat        |        | 2013 | kg | 29.68 |
| Estonia     | PoultryMeat    |        | 2013 | kg | 21.11 |
| Ethiopia    | AquaticPlants  |        | 2013 | kg | 0     |
| Ethiopia    | BovineMeat     |        | 2013 | kg | 3.61  |
| Ethiopia    | ButterGhee     |        | 2013 | kg | 0.19  |
| Ethiopia    | Cephalopods    |        | 2013 | kg | 0     |
| Ethiopia    | Cheese         |        | 2013 | kg | 0.06  |
| Ethiopia    | Cream          |        | 2013 | kg | 0     |
| Ethiopia    | DemersalFish   |        | 2013 | kg | 0     |
| Ethiopia    | Eggs           |        | 2013 | kg | 0.36  |
| Ethiopia    | FreshwaterFish |        | 2013 | kg | 0.23  |
| Ethiopia    | Honey          |        | 2013 | kg | 0.47  |
| Ethiopia    | MarineFish     | Other  | 2013 | kg | 0     |
| Ethiopia    | Milk           | Whole  | 2013 | kg | 40.01 |
| Ethiopia    | Pigmeat        |        | 2013 | kg | 0.02  |
| Ethiopia    | PoultryMeat    |        | 2013 | kg | 0.66  |
| Fiji        | AquaticAnimals | Others | 2013 | kg | 0.24  |
| Fiji        | AquaticPlants  |        | 2013 | kg | 0     |
| Fiji        | BovineMeat     |        | 2013 | kg | 8.96  |
| Fiji        | ButterGhee     |        | 2013 | kg | 4.52  |
| Fiji        | Cephalopods    |        | 2013 | kg | 0.12  |
| Fiji        | Cheese         |        | 2013 | kg | 0.58  |
| Fiji        | Cream          |        | 2013 | kg | 0.04  |
| Fiji        | DemersalFish   |        | 2013 | kg | 3.71  |
| Fiji        | Eggs           |        | 2013 | kg | 6.44  |
| Fiji        | FreshwaterFish |        | 2013 | kg | 1.13  |
| Fiji        | Honey          |        | 2013 | kg | 0.45  |
| Fiji        | MarineFish     | Other  | 2013 | kg | 7.3   |

|                 |                      |      |    |        |      |  |
|-----------------|----------------------|------|----|--------|------|--|
| Fiji            | MilkWhole            | 2013 | kg | 32.6   |      |  |
| Fiji            | Pigmeat              | 2013 | kg | 4.31   |      |  |
| Fiji            | PoultryMeat          | 2013 | kg | 20.26  |      |  |
| Fiji            | Whey                 | 2013 | kg | 1.29   |      |  |
| Finland         | AquaticAnimalsOthers | 2013 | kg |        | 0.02 |  |
| Finland         | AquaticPlants        | 2013 | kg | 0      |      |  |
| Finland         | BovineMeat           | 2013 | kg | 19.22  |      |  |
| Finland         | ButterGhee           | 2013 | kg | 5      |      |  |
| Finland         | Cephalopods          | 2013 | kg | 0.02   |      |  |
| Finland         | Cheese               | 2013 | kg | 23.1   |      |  |
| Finland         | Cream                | 2013 | kg | 5.76   |      |  |
| Finland         | DemersalFish         | 2013 | kg | 3.08   |      |  |
| Finland         | Eggs                 | 2013 | kg | 9.55   |      |  |
| Finland         | FreshwaterFish       | 2013 | kg | 15.32  |      |  |
| Finland         | Honey                | 2013 | kg | 0.56   |      |  |
| Finland         | MarineFishOther      | 2013 | kg | 1.77   |      |  |
| Finland         | MilkWhole            | 2013 | kg | 113.15 |      |  |
| Finland         | Pigmeat              | 2013 | kg | 36.14  |      |  |
| Finland         | PoultryMeat          | 2013 | kg | 19.87  |      |  |
| France          | AquaticAnimalsOthers | 2013 | kg |        | 0.07 |  |
| France          | AquaticPlants        | 2013 | kg | 0      |      |  |
| France          | BovineMeat           | 2013 | kg | 23.81  |      |  |
| France          | ButterGhee           | 2013 | kg | 7.98   |      |  |
| France          | Cephalopods          | 2013 | kg | 0.48   |      |  |
| France          | Cheese               | 2013 | kg | 23.66  |      |  |
| France          | Cream                | 2013 | kg | 4      |      |  |
| France          | DemersalFish         | 2013 | kg | 11.6   |      |  |
| France          | Eggs                 | 2013 | kg | 13.13  |      |  |
| France          | FreshwaterFish       | 2013 | kg | 4.24   |      |  |
| France          | Honey                | 2013 | kg | 0.55   |      |  |
| France          | MarineFishOther      | 2013 | kg | 0.18   |      |  |
| France          | MilkWhole            | 2013 | kg | 40.51  |      |  |
| France          | Pigmeat              | 2013 | kg | 33.05  |      |  |
| France          | PoultryMeat          | 2013 | kg | 22.93  |      |  |
| France          | Whey                 | 2013 | kg | 0.06   |      |  |
| FrenchPolynesia | AquaticAnimalsOthers | 2013 | kg |        | 1.63 |  |
| FrenchPolynesia | AquaticPlants        | 2013 | kg | 0      |      |  |
| FrenchPolynesia | BovineMeat           | 2013 | kg | 30.9   |      |  |
| FrenchPolynesia | ButterGhee           | 2013 | kg | 4.28   |      |  |
| FrenchPolynesia | Cephalopods          | 2013 | kg | 0.12   |      |  |
| FrenchPolynesia | Cheese               | 2013 | kg | 5.42   |      |  |
| FrenchPolynesia | Cream                | 2013 | kg | 4.73   |      |  |
| FrenchPolynesia | DemersalFish         | 2013 | kg | 0.47   |      |  |
| FrenchPolynesia | Eggs                 | 2013 | kg | 8.75   |      |  |
| FrenchPolynesia | FreshwaterFish       | 2013 | kg | 2.01   |      |  |
| FrenchPolynesia | Honey                | 2013 | kg | 0.42   |      |  |
| FrenchPolynesia | MarineFishOther      | 2013 | kg | 12.11  |      |  |
| FrenchPolynesia | MilkWhole            | 2013 | kg | 52.33  |      |  |
| FrenchPolynesia | Pigmeat              | 2013 | kg | 14.75  |      |  |
| FrenchPolynesia | PoultryMeat          | 2013 | kg | 49.55  |      |  |
| FrenchPolynesia | Whey                 | 2013 | kg | 0      |      |  |
| Gabon           | AquaticAnimalsOthers | 2013 | kg |        | 0    |  |
| Gabon           | AquaticPlants        | 2013 | kg | 0      |      |  |
| Gabon           | BovineMeat           | 2013 | kg | 8.6    |      |  |
| Gabon           | ButterGhee           | 2013 | kg | 0.23   |      |  |
| Gabon           | Cephalopods          | 2013 | kg | 0.17   |      |  |



|         |                      |      |    |        |  |
|---------|----------------------|------|----|--------|--|
| Gabon   | Cheese               | 2013 | kg | 0.5    |  |
| Gabon   | Cream                | 2013 | kg | 0.13   |  |
| Gabon   | DemersalFish         | 2013 | kg | 5.23   |  |
| Gabon   | Eggs                 | 2013 | kg | 1.22   |  |
| Gabon   | FreshwaterFish       | 2013 | kg | 6.5    |  |
| Gabon   | Honey                | 2013 | kg | 0.01   |  |
| Gabon   | MarineFishOther      | 2013 | kg | 5.76   |  |
| Gabon   | MilkWhole            | 2013 | kg | 23.14  |  |
| Gabon   | Pigmeat              | 2013 | kg | 10.36  |  |
| Gabon   | PoultryMeat          | 2013 | kg | 33     |  |
| Gabon   | Whey                 | 2013 | kg | 0      |  |
| Gambia  | BovineMeat           | 2013 | kg | 2.16   |  |
| Gambia  | ButterGhee           | 2013 | kg | 0.1    |  |
| Gambia  | Cephalopods          | 2013 | kg | 0.05   |  |
| Gambia  | Cheese               | 2013 | kg | 0.06   |  |
| Gambia  | Cream                | 2013 | kg | 0.19   |  |
| Gambia  | DemersalFish         | 2013 | kg | 7.4    |  |
| Gambia  | Eggs                 | 2013 | kg | 0.99   |  |
| Gambia  | FreshwaterFish       | 2013 | kg | 2.44   |  |
| Gambia  | Honey                | 2013 | kg | 0      |  |
| Gambia  | MarineFishOther      | 2013 | kg | 1.14   |  |
| Gambia  | MilkWhole            | 2013 | kg | 44.98  |  |
| Gambia  | Pigmeat              | 2013 | kg | 0.18   |  |
| Gambia  | PoultryMeat          | 2013 | kg | 2.66   |  |
| Gambia  | Whey                 | 2013 | kg | 0      |  |
| Georgia | AquaticAnimalsOthers | 2013 | kg | 0      |  |
| Georgia | AquaticPlants        | 2013 | kg | 0      |  |
| Georgia | BovineMeat           | 2013 | kg | 6.04   |  |
| Georgia | ButterGhee           | 2013 | kg | 0.55   |  |
| Georgia | Cephalopods          | 2013 | kg | 0      |  |
| Georgia | Cheese               | 2013 | kg | 0.32   |  |
| Georgia | Cream                | 2013 | kg | 0.05   |  |
| Georgia | DemersalFish         | 2013 | kg | 0.42   |  |
| Georgia | Eggs                 | 2013 | kg | 6.12   |  |
| Georgia | FreshwaterFish       | 2013 | kg | 0.48   |  |
| Georgia | Honey                | 2013 | kg | 0.9    |  |
| Georgia | MarineFishOther      | 2013 | kg | 2.79   |  |
| Georgia | MilkWhole            | 2013 | kg | 144.04 |  |
| Georgia | Pigmeat              | 2013 | kg | 8.93   |  |
| Georgia | PoultryMeat          | 2013 | kg | 12.28  |  |
| Germany | AquaticAnimalsOthers | 2013 | kg | 0      |  |
| Germany | AquaticPlants        | 2013 | kg | 0      |  |
| Germany | BovineMeat           | 2013 | kg | 13.16  |  |
| Germany | ButterGhee           | 2013 | kg | 5.16   |  |
| Germany | Cephalopods          | 2013 | kg | 0.22   |  |
| Germany | Cheese               | 2013 | kg | 21.69  |  |
| Germany | Cream                | 2013 | kg | 6.32   |  |
| Germany | DemersalFish         | 2013 | kg | 4.09   |  |
| Germany | Eggs                 | 2013 | kg | 12.2   |  |
| Germany | FreshwaterFish       | 2013 | kg | 4.25   |  |
| Germany | Honey                | 2013 | kg | 1.04   |  |
| Germany | MarineFishOther      | 2013 | kg | 0.36   |  |
| Germany | MilkWhole            | 2013 | kg | 70.64  |  |
| Germany | Pigmeat              | 2013 | kg | 51.81  |  |
| Germany | PoultryMeat          | 2013 | kg | 17.75  |  |
| Ghana   | AquaticAnimalsOthers | 2013 | kg | 0      |  |

|           |                      |      |    |       |  |
|-----------|----------------------|------|----|-------|--|
| Ghana     | AquaticPlants        | 2013 | kg | 0     |  |
| Ghana     | BovineMeat           | 2013 | kg | 1.09  |  |
| Ghana     | ButterGhee           | 2013 | kg | 0.07  |  |
| Ghana     | Cephalopods          | 2013 | kg | 0.1   |  |
| Ghana     | Cheese               | 2013 | kg | 0.03  |  |
| Ghana     | Cream                | 2013 | kg | 0     |  |
| Ghana     | DemersalFish         | 2013 | kg | 1.48  |  |
| Ghana     | Eggs                 | 2013 | kg | 1.21  |  |
| Ghana     | FreshwaterFish       | 2013 | kg | 4.86  |  |
| Ghana     | Honey                | 2013 | kg | 0     |  |
| Ghana     | MarineFishOther      | 2013 | kg | 0.33  |  |
| Ghana     | MilkWhole            | 2013 | kg | 3.17  |  |
| Ghana     | Pigmeat              | 2013 | kg | 1.36  |  |
| Ghana     | PoultryMeat          | 2013 | kg | 8.63  |  |
| Ghana     | Whey                 | 2013 | kg | 2.27  |  |
| Greece    | AquaticAnimalsOthers | 2013 | kg | 0.01  |  |
| Greece    | AquaticPlants        | 2013 | kg | 0     |  |
| Greece    | BovineMeat           | 2013 | kg | 16.1  |  |
| Greece    | ButterGhee           | 2013 | kg | 1.05  |  |
| Greece    | Cephalopods          | 2013 | kg | 2.66  |  |
| Greece    | Cheese               | 2013 | kg | 25.47 |  |
| Greece    | Cream                | 2013 | kg | 2.47  |  |
| Greece    | DemersalFish         | 2013 | kg | 8.8   |  |
| Greece    | Eggs                 | 2013 | kg | 10.13 |  |
| Greece    | FreshwaterFish       | 2013 | kg | 2     |  |
| Greece    | Honey                | 2013 | kg | 1.55  |  |
| Greece    | MarineFishOther      | 2013 | kg | 0.43  |  |
| Greece    | MilkWhole            | 2013 | kg | 75.52 |  |
| Greece    | Pigmeat              | 2013 | kg | 28.31 |  |
| Greece    | PoultryMeat          | 2013 | kg | 15.74 |  |
| Grenada   | AquaticAnimalsOthers | 2013 | kg | 0.01  |  |
| Grenada   | AquaticPlants        | 2013 | kg | 0     |  |
| Grenada   | BovineMeat           | 2013 | kg | 3.46  |  |
| Grenada   | ButterGhee           | 2013 | kg | 0.28  |  |
| Grenada   | Cephalopods          | 2013 | kg | 0     |  |
| Grenada   | Cheese               | 2013 | kg | 3.73  |  |
| Grenada   | Cream                | 2013 | kg | 0.24  |  |
| Grenada   | DemersalFish         | 2013 | kg | 7.39  |  |
| Grenada   | Eggs                 | 2013 | kg | 10.34 |  |
| Grenada   | FreshwaterFish       | 2013 | kg | 0     |  |
| Grenada   | MarineFishOther      | 2013 | kg | 2.73  |  |
| Grenada   | MilkWhole            | 2013 | kg | 48.32 |  |
| Grenada   | Pigmeat              | 2013 | kg | 11.52 |  |
| Grenada   | PoultryMeat          | 2013 | kg | 43.51 |  |
| Guatemala | AquaticPlants        | 2013 | kg | 0     |  |
| Guatemala | BovineMeat           | 2013 | kg | 5.6   |  |
| Guatemala | ButterGhee           | 2013 | kg | 0.22  |  |
| Guatemala | Cephalopods          | 2013 | kg | 0.03  |  |
| Guatemala | Cheese               | 2013 | kg | 1.52  |  |
| Guatemala | Cream                | 2013 | kg | 0.4   |  |
| Guatemala | DemersalFish         | 2013 | kg | 0.02  |  |
| Guatemala | Eggs                 | 2013 | kg | 14.61 |  |
| Guatemala | FreshwaterFish       | 2013 | kg | 0.53  |  |
| Guatemala | Honey                | 2013 | kg | 0.04  |  |
| Guatemala | MarineFishOther      | 2013 | kg | 0.08  |  |
| Guatemala | MilkWhole            | 2013 | kg | 26.02 |  |

|               |                      |      |    |       |  |
|---------------|----------------------|------|----|-------|--|
| Guatemala     | Pigmeat              | 2013 | kg | 4.85  |  |
| Guatemala     | PoultryMeat          | 2013 | kg | 16.45 |  |
| Guinea        | AquaticPlants        | 2013 | kg | 0     |  |
| Guinea        | BovineMeat           | 2013 | kg | 6.26  |  |
| Guinea        | ButterGhee           | 2013 | kg | 0.05  |  |
| Guinea        | Cephalopods          | 2013 | kg | 0     |  |
| Guinea        | Cheese               | 2013 | kg | 0.01  |  |
| Guinea        | Cream                | 2013 | kg | 0     |  |
| Guinea        | DemersalFish         | 2013 | kg | 2.41  |  |
| Guinea        | Eggs                 | 2013 | kg | 1.95  |  |
| Guinea        | FreshwaterFish       | 2013 | kg | 1.51  |  |
| Guinea        | Honey                | 2013 | kg | 0.08  |  |
| Guinea        | MarineFishOther      | 2013 | kg | 1.27  |  |
| Guinea        | MilkWhole            | 2013 | kg | 19.58 |  |
| Guinea        | Pigmeat              | 2013 | kg | 0.16  |  |
| Guinea        | PoultryMeat          | 2013 | kg | 1.83  |  |
| Guinea        | Whey                 | 2013 | kg | 0.09  |  |
| Guinea-Bissau | BovineMeat           | 2013 | kg | 3.94  |  |
| Guinea-Bissau | ButterGhee           | 2013 | kg | 0     |  |
| Guinea-Bissau | Cephalopods          | 2013 | kg | 0.08  |  |
| Guinea-Bissau | Cheese               | 2013 | kg | 0.01  |  |
| Guinea-Bissau | DemersalFish         | 2013 | kg | 0.32  |  |
| Guinea-Bissau | Eggs                 | 2013 | kg | 0.69  |  |
| Guinea-Bissau | FreshwaterFish       | 2013 | kg | 0.09  |  |
| Guinea-Bissau | Honey                | 2013 | kg | 0.08  |  |
| Guinea-Bissau | MarineFishOther      | 2013 | kg | 0.41  |  |
| Guinea-Bissau | MilkWhole            | 2013 | kg | 19.63 |  |
| Guinea-Bissau | Pigmeat              | 2013 | kg | 9.08  |  |
| Guinea-Bissau | PoultryMeat          | 2013 | kg | 1.88  |  |
| Guyana        | BovineMeat           | 2013 | kg | 3.22  |  |
| Guyana        | ButterGhee           | 2013 | kg | 0.11  |  |
| Guyana        | Cheese               | 2013 | kg | 1.81  |  |
| Guyana        | Cream                | 2013 | kg | 0.05  |  |
| Guyana        | DemersalFish         | 2013 | kg | 1.69  |  |
| Guyana        | Eggs                 | 2013 | kg | 0.79  |  |
| Guyana        | FreshwaterFish       | 2013 | kg | 0.87  |  |
| Guyana        | Honey                | 2013 | kg | 0.13  |  |
| Guyana        | MarineFishOther      | 2013 | kg | 10.79 |  |
| Guyana        | MilkWhole            | 2013 | kg | 79.41 |  |
| Guyana        | Pigmeat              | 2013 | kg | 3.38  |  |
| Guyana        | PoultryMeat          | 2013 | kg | 35.99 |  |
| Guyana        | Whey                 | 2013 | kg | 0     |  |
| Haiti         | AquaticAnimalsOthers | 2013 | kg | 0     |  |
| Haiti         | AquaticPlants        | 2013 | kg | 0     |  |
| Haiti         | BovineMeat           | 2013 | kg | 4.6   |  |
| Haiti         | ButterGhee           | 2013 | kg | 0.01  |  |
| Haiti         | Cephalopods          | 2013 | kg | 0     |  |
| Haiti         | Cheese               | 2013 | kg | 0.28  |  |
| Haiti         | Cream                | 2013 | kg | 0.01  |  |
| Haiti         | DemersalFish         | 2013 | kg | 0.29  |  |
| Haiti         | Eggs                 | 2013 | kg | 0.51  |  |
| Haiti         | FreshwaterFish       | 2013 | kg | 0.48  |  |
| Haiti         | Honey                | 2013 | kg | 0.04  |  |
| Haiti         | MarineFishOther      | 2013 | kg | 1.55  |  |
| Haiti         | MilkWhole            | 2013 | kg | 16.42 |  |
| Haiti         | Pigmeat              | 2013 | kg | 4.28  |  |

|          | PoultryMeat          | 2013 | kg | 7.58  |  |
|----------|----------------------|------|----|-------|--|
| Honduras | AquaticAnimalsOthers | 2013 | kg | 0     |  |
| Honduras | AquaticPlants        | 2013 | kg | 0     |  |
| Honduras | BovineMeat           | 2013 | kg | 7.19  |  |
| Honduras | ButterGhee           | 2013 | kg | 0.82  |  |
| Honduras | Cephalopods          | 2013 | kg | 0.01  |  |
| Honduras | Cheese               | 2013 | kg | 1.84  |  |
| Honduras | Cream                | 2013 | kg | 0.01  |  |
| Honduras | DemersalFish         | 2013 | kg | 0.01  |  |
| Honduras | Eggs                 | 2013 | kg | 5.19  |  |
| Honduras | FreshwaterFish       | 2013 | kg | 1.25  |  |
| Honduras | Honey                | 2013 | kg | 0.03  |  |
| Honduras | MarineFishOther      | 2013 | kg | 0.48  |  |
| Honduras | MilkWhole            | 2013 | kg | 68.99 |  |
| Honduras | Pigmeat              | 2013 | kg | 6.48  |  |
| Honduras | PoultryMeat          | 2013 | kg | 20.29 |  |
| Honduras | Whey                 | 2013 | kg | 0.01  |  |
| Hungary  | AquaticAnimalsOthers | 2013 | kg | 0.02  |  |
| Hungary  | AquaticPlants        | 2013 | kg | 0     |  |
| Hungary  | BovineMeat           | 2013 | kg | 4.96  |  |
| Hungary  | ButterGhee           | 2013 | kg | 0.81  |  |
| Hungary  | Cephalopods          | 2013 | kg | 0.02  |  |
| Hungary  | Cheese               | 2013 | kg | 10.78 |  |
| Hungary  | Cream                | 2013 | kg | 6.57  |  |
| Hungary  | DemersalFish         | 2013 | kg | 0.99  |  |
| Hungary  | Eggs                 | 2013 | kg | 12.45 |  |
| Hungary  | FreshwaterFish       | 2013 | kg | 2.69  |  |
| Hungary  | Honey                | 2013 | kg | 0.02  |  |
| Hungary  | MarineFishOther      | 2013 | kg | 0.21  |  |
| Hungary  | MilkWhole            | 2013 | kg | 63.79 |  |
| Hungary  | Pigmeat              | 2013 | kg | 34.93 |  |
| Hungary  | PoultryMeat          | 2013 | kg | 23.78 |  |
| Iceland  | AquaticAnimalsOthers | 2013 | kg | 0.05  |  |
| Iceland  | AquaticPlants        | 2013 | kg | 0     |  |
| Iceland  | BovineMeat           | 2013 | kg | 13.36 |  |
| Iceland  | ButterGhee           | 2013 | kg | 6.14  |  |
| Iceland  | Cephalopods          | 2013 | kg | 0     |  |
| Iceland  | Cheese               | 2013 | kg | 30.82 |  |
| Iceland  | Cream                | 2013 | kg | 7.75  |  |
| Iceland  | DemersalFish         | 2013 | kg | 25.81 |  |
| Iceland  | Eggs                 | 2013 | kg | 8.24  |  |
| Iceland  | FreshwaterFish       | 2013 | kg | 4.91  |  |
| Iceland  | Honey                | 2013 | kg | 0.34  |  |
| Iceland  | MarineFishOther      | 2013 | kg | 0     |  |
| Iceland  | MilkWhole            | 2013 | kg | 54    |  |
| Iceland  | Pigmeat              | 2013 | kg | 21.69 |  |
| Iceland  | PoultryMeat          | 2013 | kg | 26.87 |  |
| India    | AquaticAnimalsOthers | 2013 | kg | 0     |  |
| India    | AquaticPlants        | 2013 | kg | 0     |  |
| India    | BovineMeat           | 2013 | kg | 0.81  |  |
| India    | ButterGhee           | 2013 | kg | 3.03  |  |
| India    | Cephalopods          | 2013 | kg | 0     |  |
| India    | Cheese               | 2013 | kg | 0     |  |
| India    | Cream                | 2013 | kg | 0     |  |
| India    | DemersalFish         | 2013 | kg | 0.3   |  |
| India    | Eggs                 | 2013 | kg | 2.58  |  |

|           |                      |      |    |       |  |
|-----------|----------------------|------|----|-------|--|
| India     | FreshwaterFish       | 2013 | kg | 3.48  |  |
| India     | Honey                | 2013 | kg | 0.02  |  |
| India     | MarineFishOther      | 2013 | kg | 0.39  |  |
| India     | MilkWhole            | 2013 | kg | 52.81 |  |
| India     | Pigmeat              | 2013 | kg | 0.28  |  |
| India     | PoultryMeat          | 2013 | kg | 1.88  |  |
| India     | Whey                 | 2013 | kg | 0     |  |
| Indonesia | AquaticAnimalsOthers | 2013 | kg | 0     |  |
| Indonesia | AquaticPlants        | 2013 | kg | 0     |  |
| Indonesia | BovineMeat           | 2013 | kg | 2.59  |  |
| Indonesia | ButterGhee           | 2013 | kg | 0.09  |  |
| Indonesia | Cephalopods          | 2013 | kg | 0.47  |  |
| Indonesia | Cheese               | 2013 | kg | 0.08  |  |
| Indonesia | Cream                | 2013 | kg | 0.06  |  |
| Indonesia | DemersalFish         | 2013 | kg | 4.51  |  |
| Indonesia | Eggs                 | 2013 | kg | 4.88  |  |
| Indonesia | FreshwaterFish       | 2013 | kg | 9.01  |  |
| Indonesia | Honey                | 2013 | kg | 0.01  |  |
| Indonesia | MarineFishOther      | 2013 | kg | 0.54  |  |
| Indonesia | MilkWhole            | 2013 | kg | 6     |  |
| Indonesia | Pigmeat              | 2013 | kg | 2.98  |  |
| Indonesia | PoultryMeat          | 2013 | kg | 7.5   |  |
| Iran      | AquaticAnimalsOthers | 2013 | kg | 0     |  |
| Iran      | AquaticPlants        | 2013 | kg | 0     |  |
| Iran      | BovineMeat           | 2013 | kg | 3.58  |  |
| Iran      | ButterGhee           | 2013 | kg | 2.66  |  |
| Iran      | Cephalopods          | 2013 | kg | 0.03  |  |
| Iran      | Cheese               | 2013 | kg | 2.76  |  |
| Iran      | Cream                | 2013 | kg | 0.01  |  |
| Iran      | DemersalFish         | 2013 | kg | 0.96  |  |
| Iran      | Eggs                 | 2013 | kg | 7.7   |  |
| Iran      | FreshwaterFish       | 2013 | kg | 5.03  |  |
| Iran      | Honey                | 2013 | kg | 0.96  |  |
| Iran      | MarineFishOther      | 2013 | kg | 0.33  |  |
| Iran      | MilkWhole            | 2013 | kg | 17.69 |  |
| Iran      | Pigmeat              | 2013 | kg | 0     |  |
| Iran      | PoultryMeat          | 2013 | kg | 25.38 |  |
| Iraq      | AquaticAnimalsOthers | 2013 | kg | 0     |  |
| Iraq      | AquaticPlants        | 2013 | kg | 0     |  |
| Iraq      | BovineMeat           | 2013 | kg | 2.96  |  |
| Iraq      | ButterGhee           | 2013 | kg | 0.18  |  |
| Iraq      | Cephalopods          | 2013 | kg | 0     |  |
| Iraq      | Cheese               | 2013 | kg | 1.06  |  |
| Iraq      | DemersalFish         | 2013 | kg | 0.83  |  |
| Iraq      | Eggs                 | 2013 | kg | 9.83  |  |
| Iraq      | FreshwaterFish       | 2013 | kg | 2.23  |  |
| Iraq      | Honey                | 2013 | kg | 0.02  |  |
| Iraq      | MarineFishOther      | 2013 | kg | 0.06  |  |
| Iraq      | MilkWhole            | 2013 | kg | 10.59 |  |
| Iraq      | Pigmeat              | 2013 | kg | 0     |  |
| Iraq      | PoultryMeat          | 2013 | kg | 14.83 |  |
| Ireland   | AquaticAnimalsOthers | 2013 | kg | 0.02  |  |
| Ireland   | AquaticPlants        | 2013 | kg | 0     |  |
| Ireland   | BovineMeat           | 2013 | kg | 22.35 |  |
| Ireland   | ButterGhee           | 2013 | kg | 3.03  |  |
| Ireland   | Cephalopods          | 2013 | kg | 0.05  |  |

|         |                      |      |    |       |  |
|---------|----------------------|------|----|-------|--|
| Ireland | Cheese               | 2013 | kg | 13.17 |  |
| Ireland | Cream                | 2013 | kg | 5.3   |  |
| Ireland | DemersalFish         | 2013 | kg | 10.35 |  |
| Ireland | Eggs                 | 2013 | kg | 8.96  |  |
| Ireland | FreshwaterFish       | 2013 | kg | 1.15  |  |
| Ireland | Honey                | 2013 | kg | 0.73  |  |
| Ireland | MarineFishOther      | 2013 | kg | 0.04  |  |
| Ireland | MilkWhole            | 2013 | kg | 91.94 |  |
| Ireland | Pigmeat              | 2013 | kg | 32.4  |  |
| Ireland | PoultryMeat          | 2013 | kg | 26.26 |  |
| Israel  | AquaticAnimalsOthers | 2013 | kg | 0.02  |  |
| Israel  | AquaticPlants        | 2013 | kg | 0     |  |
| Israel  | BovineMeat           | 2013 | kg | 28.78 |  |
| Israel  | ButterGhee           | 2013 | kg | 0.84  |  |
| Israel  | Cephalopods          | 2013 | kg | 0.18  |  |
| Israel  | Cheese               | 2013 | kg | 17.33 |  |
| Israel  | Cream                | 2013 | kg | 0     |  |
| Israel  | DemersalFish         | 2013 | kg | 5.45  |  |
| Israel  | Eggs                 | 2013 | kg | 11.35 |  |
| Israel  | FreshwaterFish       | 2013 | kg | 8.72  |  |
| Israel  | Honey                | 2013 | kg | 0.52  |  |
| Israel  | MarineFishOther      | 2013 | kg | 0.29  |  |
| Israel  | MilkWhole            | 2013 | kg | 89.5  |  |
| Israel  | Pigmeat              | 2013 | kg | 1.99  |  |
| Israel  | PoultryMeat          | 2013 | kg | 62.5  |  |
| Italy   | AquaticAnimalsOthers | 2013 | kg | 0.44  |  |
| Italy   | AquaticPlants        | 2013 | kg | 0     |  |
| Italy   | BovineMeat           | 2013 | kg | 18.6  |  |
| Italy   | ButterGhee           | 2013 | kg | 2.84  |  |
| Italy   | Cephalopods          | 2013 | kg | 3.01  |  |
| Italy   | Cheese               | 2013 | kg | 23.11 |  |
| Italy   | Cream                | 2013 | kg | 2.95  |  |
| Italy   | DemersalFish         | 2013 | kg | 7.03  |  |
| Italy   | Eggs                 | 2013 | kg | 13.34 |  |
| Italy   | FreshwaterFish       | 2013 | kg | 3.06  |  |
| Italy   | Honey                | 2013 | kg | 0.27  |  |
| Italy   | MarineFishOther      | 2013 | kg | 1.07  |  |
| Italy   | MilkWhole            | 2013 | kg | 29.78 |  |
| Italy   | Pigmeat              | 2013 | kg | 40.28 |  |
| Italy   | PoultryMeat          | 2013 | kg | 18.61 |  |
| Jamaica | AquaticAnimalsOthers | 2013 | kg | 0     |  |
| Jamaica | AquaticPlants        | 2013 | kg | 0     |  |
| Jamaica | BovineMeat           | 2013 | kg | 3.97  |  |
| Jamaica | ButterGhee           | 2013 | kg | 0.31  |  |
| Jamaica | Cephalopods          | 2013 | kg | 0.01  |  |
| Jamaica | Cheese               | 2013 | kg | 1.23  |  |
| Jamaica | Cream                | 2013 | kg | 0.07  |  |
| Jamaica | DemersalFish         | 2013 | kg | 0.05  |  |
| Jamaica | Eggs                 | 2013 | kg | 2.27  |  |
| Jamaica | FreshwaterFish       | 2013 | kg | 0.69  |  |
| Jamaica | Honey                | 2013 | kg | 0.28  |  |
| Jamaica | MarineFishOther      | 2013 | kg | 12.61 |  |
| Jamaica | MilkWhole            | 2013 | kg | 72.18 |  |
| Jamaica | Pigmeat              | 2013 | kg | 3.99  |  |
| Jamaica | PoultryMeat          | 2013 | kg | 52.51 |  |
| Japan   | AquaticAnimalsOthers | 2013 | kg | 0.26  |  |

|            |                      |      |    |        |  |
|------------|----------------------|------|----|--------|--|
| Japan      | AquaticPlants        | 2013 | kg | 0.92   |  |
| Japan      | BovineMeat           | 2013 | kg | 9.15   |  |
| Japan      | ButterGhee           | 2013 | kg | 0.57   |  |
| Japan      | Cephalopods          | 2013 | kg | 3.93   |  |
| Japan      | Cheese               | 2013 | kg | 2.89   |  |
| Japan      | Cream                | 2013 | kg | 0      |  |
| Japan      | DemersalFish         | 2013 | kg | 7.3    |  |
| Japan      | Eggs                 | 2013 | kg | 19.15  |  |
| Japan      | FreshwaterFish       | 2013 | kg | 5      |  |
| Japan      | Honey                | 2013 | kg | 0.33   |  |
| Japan      | MarineFishOther      | 2013 | kg | 5.75   |  |
| Japan      | MilkWhole            | 2013 | kg | 46.08  |  |
| Japan      | Pigmeat              | 2013 | kg | 20.62  |  |
| Japan      | PoultryMeat          | 2013 | kg | 19.42  |  |
| Jordan     | AquaticPlants        | 2013 | kg | 0      |  |
| Jordan     | BovineMeat           | 2013 | kg | 5.61   |  |
| Jordan     | ButterGhee           | 2013 | kg | 0.22   |  |
| Jordan     | Cephalopods          | 2013 | kg | 0.01   |  |
| Jordan     | Cheese               | 2013 | kg | 2.69   |  |
| Jordan     | Cream                | 2013 | kg | 0.46   |  |
| Jordan     | DemersalFish         | 2013 | kg | 0.29   |  |
| Jordan     | Eggs                 | 2013 | kg | 3.92   |  |
| Jordan     | FreshwaterFish       | 2013 | kg | 0.16   |  |
| Jordan     | Honey                | 2013 | kg | 0.13   |  |
| Jordan     | MarineFishOther      | 2013 | kg | 2.7    |  |
| Jordan     | MilkWhole            | 2013 | kg | 38.55  |  |
| Jordan     | Pigmeat              | 2013 | kg | 0.02   |  |
| Jordan     | PoultryMeat          | 2013 | kg | 33.39  |  |
| Kazakhstan | AquaticAnimalsOthers | 2013 | kg | 0.01   |  |
| Kazakhstan | AquaticPlants        | 2013 | kg | 0      |  |
| Kazakhstan | BovineMeat           | 2013 | kg | 23.38  |  |
| Kazakhstan | ButterGhee           | 2013 | kg | 1.37   |  |
| Kazakhstan | Cephalopods          | 2013 | kg | 0.02   |  |
| Kazakhstan | Cheese               | 2013 | kg | 2.63   |  |
| Kazakhstan | Cream                | 2013 | kg | 0.95   |  |
| Kazakhstan | DemersalFish         | 2013 | kg | 0.52   |  |
| Kazakhstan | Eggs                 | 2013 | kg | 8.29   |  |
| Kazakhstan | FreshwaterFish       | 2013 | kg | 1.74   |  |
| Kazakhstan | Honey                | 2013 | kg | 0.12   |  |
| Kazakhstan | MarineFishOther      | 2013 | kg | 0.5    |  |
| Kazakhstan | MilkWhole            | 2013 | kg | 258.44 |  |
| Kazakhstan | Pigmeat              | 2013 | kg | 10.36  |  |
| Kazakhstan | PoultryMeat          | 2013 | kg | 18.38  |  |
| Kenya      | AquaticAnimalsOthers | 2013 | kg | 0      |  |
| Kenya      | AquaticPlants        | 2013 | kg | 0      |  |
| Kenya      | BovineMeat           | 2013 | kg | 9.54   |  |
| Kenya      | ButterGhee           | 2013 | kg | 0.35   |  |
| Kenya      | Cephalopods          | 2013 | kg | 0      |  |
| Kenya      | Cheese               | 2013 | kg | 0.01   |  |
| Kenya      | Cream                | 2013 | kg | 0.34   |  |
| Kenya      | DemersalFish         | 2013 | kg | 0.08   |  |
| Kenya      | Eggs                 | 2013 | kg | 1.84   |  |
| Kenya      | FreshwaterFish       | 2013 | kg | 4.12   |  |
| Kenya      | Honey                | 2013 | kg | 0.27   |  |
| Kenya      | MarineFishOther      | 2013 | kg | 0.04   |  |
| Kenya      | MilkWhole            | 2013 | kg | 89.66  |  |

|            |                      |      |    |        |  |
|------------|----------------------|------|----|--------|--|
| Kenya      | Pigmeat              | 2013 | kg | 0.29   |  |
| Kenya      | PoultryMeat          | 2013 | kg | 0.47   |  |
| Kenya      | Whey                 | 2013 | kg | 0      |  |
| Kiribati   | AquaticAnimalsOthers | 2013 | kg | 0.47   |  |
| Kiribati   | AquaticPlants        | 2013 | kg | 0      |  |
| Kiribati   | BovineMeat           | 2013 | kg | 3.92   |  |
| Kiribati   | ButterGhee           | 2013 | kg | 0.28   |  |
| Kiribati   | Cephalopods          | 2013 | kg | 0      |  |
| Kiribati   | Cheese               | 2013 | kg | 0.02   |  |
| Kiribati   | Cream                | 2013 | kg | 0      |  |
| Kiribati   | DemersalFish         | 2013 | kg | 17.69  |  |
| Kiribati   | Eggs                 | 2013 | kg | 2.78   |  |
| Kiribati   | FreshwaterFish       | 2013 | kg | 0.03   |  |
| Kiribati   | Honey                | 2013 | kg | 0.01   |  |
| Kiribati   | MarineFishOther      | 2013 | kg | 0.74   |  |
| Kiribati   | MilkWhole            | 2013 | kg | 1.06   |  |
| Kiribati   | Pigmeat              | 2013 | kg | 11.89  |  |
| Kiribati   | PoultryMeat          | 2013 | kg | 15.89  |  |
| Kiribati   | Whey                 | 2013 | kg | 1.19   |  |
| Kuwait     | AquaticAnimalsOthers | 2013 | kg | 0.03   |  |
| Kuwait     | AquaticPlants        | 2013 | kg | 0      |  |
| Kuwait     | BovineMeat           | 2013 | kg | 13.03  |  |
| Kuwait     | ButterGhee           | 2013 | kg | 2.63   |  |
| Kuwait     | Cephalopods          | 2013 | kg | 0.03   |  |
| Kuwait     | Cheese               | 2013 | kg | 8.69   |  |
| Kuwait     | Cream                | 2013 | kg | 0.3    |  |
| Kuwait     | DemersalFish         | 2013 | kg | 2.99   |  |
| Kuwait     | Eggs                 | 2013 | kg | 12.6   |  |
| Kuwait     | FreshwaterFish       | 2013 | kg | 2.64   |  |
| Kuwait     | Honey                | 2013 | kg | 0.37   |  |
| Kuwait     | MarineFishOther      | 2013 | kg | 1.76   |  |
| Kuwait     | MilkWhole            | 2013 | kg | 43.16  |  |
| Kuwait     | PoultryMeat          | 2013 | kg | 53.61  |  |
| Kyrgyzstan | AquaticPlants        | 2013 | kg | 0      |  |
| Kyrgyzstan | BovineMeat           | 2013 | kg | 14.9   |  |
| Kyrgyzstan | ButterGhee           | 2013 | kg | 0.27   |  |
| Kyrgyzstan | Cephalopods          | 2013 | kg | 0      |  |
| Kyrgyzstan | Cheese               | 2013 | kg | 0.74   |  |
| Kyrgyzstan | Cream                | 2013 | kg | 0.13   |  |
| Kyrgyzstan | DemersalFish         | 2013 | kg | 0.06   |  |
| Kyrgyzstan | Eggs                 | 2013 | kg | 4.64   |  |
| Kyrgyzstan | FreshwaterFish       | 2013 | kg | 0.13   |  |
| Kyrgyzstan | Honey                | 2013 | kg | 0.26   |  |
| Kyrgyzstan | MarineFishOther      | 2013 | kg | 0.51   |  |
| Kyrgyzstan | MilkWhole            | 2013 | kg | 202.86 |  |
| Kyrgyzstan | Pigmeat              | 2013 | kg | 4.52   |  |
| Kyrgyzstan | PoultryMeat          | 2013 | kg | 2.31   |  |
| Lao        | AquaticAnimalsOthers | 2013 | kg | 0      |  |
| Lao        | AquaticPlants        | 2013 | kg | 0      |  |
| Lao        | BovineMeat           | 2013 | kg | 7.29   |  |
| Lao        | ButterGhee           | 2013 | kg | 0.04   |  |
| Lao        | Cephalopods          | 2013 | kg | 0      |  |
| Lao        | Cheese               | 2013 | kg | 0.01   |  |
| Lao        | DemersalFish         | 2013 | kg | 0      |  |
| Lao        | Eggs                 | 2013 | kg | 2.04   |  |
| Lao        | FreshwaterFish       | 2013 | kg | 19.19  |  |



|         |                      |      |    |       |  |
|---------|----------------------|------|----|-------|--|
| Lao     | MarineFishOther      | 2013 | kg | 0.24  |  |
| Lao     | MilkWhole            | 2013 | kg | 2.53  |  |
| Lao     | Pigmeat              | 2013 | kg | 9.31  |  |
| Lao     | PoultryMeat          | 2013 | kg | 4.21  |  |
| Latvia  | AquaticAnimalsOthers | 2013 | kg | 0.01  |  |
| Latvia  | AquaticPlants        | 2013 | kg | 0     |  |
| Latvia  | BovineMeat           | 2013 | kg | 5.11  |  |
| Latvia  | ButterGhee           | 2013 | kg | 1.68  |  |
| Latvia  | Cephalopods          | 2013 | kg | 0.16  |  |
| Latvia  | Cheese               | 2013 | kg | 16.32 |  |
| Latvia  | Cream                | 2013 | kg | 18.45 |  |
| Latvia  | DemersalFish         | 2013 | kg | 2.59  |  |
| Latvia  | Eggs                 | 2013 | kg | 14.03 |  |
| Latvia  | FreshwaterFish       | 2013 | kg | 3.12  |  |
| Latvia  | Honey                | 2013 | kg | 0.87  |  |
| Latvia  | MarineFishOther      | 2013 | kg | 5.57  |  |
| Latvia  | MilkWhole            | 2013 | kg | 32.22 |  |
| Latvia  | Pigmeat              | 2013 | kg | 34.96 |  |
| Latvia  | PoultryMeat          | 2013 | kg | 20.53 |  |
| Latvia  | Whey                 | 2013 | kg | 0.46  |  |
| Lebanon | AquaticPlants        | 2013 | kg | 0     |  |
| Lebanon | BovineMeat           | 2013 | kg | 15.22 |  |
| Lebanon | ButterGhee           | 2013 | kg | 1.24  |  |
| Lebanon | Cephalopods          | 2013 | kg | 0.1   |  |
| Lebanon | Cheese               | 2013 | kg | 9.28  |  |
| Lebanon | Cream                | 2013 | kg | 0.65  |  |
| Lebanon | DemersalFish         | 2013 | kg | 0.48  |  |
| Lebanon | Eggs                 | 2013 | kg | 3.7   |  |
| Lebanon | FreshwaterFish       | 2013 | kg | 0.66  |  |
| Lebanon | Honey                | 2013 | kg | 0.37  |  |
| Lebanon | MarineFishOther      | 2013 | kg | 4.87  |  |
| Lebanon | MilkWhole            | 2013 | kg | 51.07 |  |
| Lebanon | Pigmeat              | 2013 | kg | 1.7   |  |
| Lebanon | PoultryMeat          | 2013 | kg | 20.37 |  |
| Lebanon | Whey                 | 2013 | kg | 1.5   |  |
| Lesotho | AquaticPlants        | 2013 | kg | 0     |  |
| Lesotho | BovineMeat           | 2013 | kg | 6.02  |  |
| Lesotho | ButterGhee           | 2013 | kg | 0.06  |  |
| Lesotho | Cephalopods          | 2013 | kg | 0     |  |
| Lesotho | Cheese               | 2013 | kg | 0.11  |  |
| Lesotho | DemersalFish         | 2013 | kg | 0     |  |
| Lesotho | Eggs                 | 2013 | kg | 1.06  |  |
| Lesotho | FreshwaterFish       | 2013 | kg | 0.19  |  |
| Lesotho | Honey                | 2013 | kg | 0.01  |  |
| Lesotho | MarineFishOther      | 2013 | kg | 0.18  |  |
| Lesotho | MilkWhole            | 2013 | kg | 19.86 |  |
| Lesotho | Pigmeat              | 2013 | kg | 2.14  |  |
| Lesotho | PoultryMeat          | 2013 | kg | 10.24 |  |
| Liberia | AquaticAnimalsOthers | 2013 | kg | 0     |  |
| Liberia | BovineMeat           | 2013 | kg | 0.78  |  |
| Liberia | ButterGhee           | 2013 | kg | 0.01  |  |
| Liberia | Cephalopods          | 2013 | kg | 0.01  |  |
| Liberia | Cheese               | 2013 | kg | 0.02  |  |
| Liberia | DemersalFish         | 2013 | kg | 0.85  |  |
| Liberia | Eggs                 | 2013 | kg | 2.05  |  |
| Liberia | FreshwaterFish       | 2013 | kg | 0.54  |  |

|            |                      |      |    |       |  |
|------------|----------------------|------|----|-------|--|
| Liberia    | Honey                | 2013 | kg | 0     |  |
| Liberia    | MarineFishOther      | 2013 | kg | 1.09  |  |
| Liberia    | MilkWhole            | 2013 | kg | 2.42  |  |
| Liberia    | Pigmeat              | 2013 | kg | 4.01  |  |
| Liberia    | PoultryMeat          | 2013 | kg | 8.91  |  |
| Liberia    | Whey                 | 2013 | kg | 0     |  |
| Lithuania  | AquaticAnimalsOthers | 2013 | kg | 0.24  |  |
| Lithuania  | AquaticPlants        | 2013 | kg | 0     |  |
| Lithuania  | BovineMeat           | 2013 | kg | 4.49  |  |
| Lithuania  | ButterGhee           | 2013 | kg | 2.51  |  |
| Lithuania  | Cephalopods          | 2013 | kg | 0.09  |  |
| Lithuania  | Cheese               | 2013 | kg | 15.1  |  |
| Lithuania  | Cream                | 2013 | kg | 5.15  |  |
| Lithuania  | DemersalFish         | 2013 | kg | 6.33  |  |
| Lithuania  | Eggs                 | 2013 | kg | 13.11 |  |
| Lithuania  | FreshwaterFish       | 2013 | kg | 4.36  |  |
| Lithuania  | Honey                | 2013 | kg | 0.68  |  |
| Lithuania  | MarineFishOther      | 2013 | kg | 0.01  |  |
| Lithuania  | MilkWhole            | 2013 | kg | 81.06 |  |
| Lithuania  | Pigmeat              | 2013 | kg | 45.67 |  |
| Lithuania  | PoultryMeat          | 2013 | kg | 26.84 |  |
| Luxembourg | AquaticAnimalsOthers | 2013 | kg | 0.14  |  |
| Luxembourg | AquaticPlants        | 2013 | kg | 0     |  |
| Luxembourg | BovineMeat           | 2013 | kg | 29.88 |  |
| Luxembourg | ButterGhee           | 2013 | kg | 2.01  |  |
| Luxembourg | Cephalopods          | 2013 | kg | 0.9   |  |
| Luxembourg | Cheese               | 2013 | kg | 14.86 |  |
| Luxembourg | Cream                | 2013 | kg | 2.93  |  |
| Luxembourg | DemersalFish         | 2013 | kg | 8.46  |  |
| Luxembourg | Eggs                 | 2013 | kg | 14.64 |  |
| Luxembourg | FreshwaterFish       | 2013 | kg | 7.43  |  |
| Luxembourg | Honey                | 2013 | kg | 0.48  |  |
| Luxembourg | MarineFishOther      | 2013 | kg | 2.52  |  |
| Luxembourg | MilkWhole            | 2013 | kg | 87.91 |  |
| Luxembourg | Pigmeat              | 2013 | kg | 43.58 |  |
| Luxembourg | PoultryMeat          | 2013 | kg | 21.37 |  |
| Madagascar | AquaticAnimalsOthers | 2013 | kg | 0.04  |  |
| Madagascar | AquaticPlants        | 2013 | kg | 0     |  |
| Madagascar | BovineMeat           | 2013 | kg | 7.51  |  |
| Madagascar | ButterGhee           | 2013 | kg | 0.01  |  |
| Madagascar | Cephalopods          | 2013 | kg | 0.02  |  |
| Madagascar | Cheese               | 2013 | kg | 0.02  |  |
| Madagascar | Cream                | 2013 | kg | 0     |  |
| Madagascar | DemersalFish         | 2013 | kg | 0.24  |  |
| Madagascar | Eggs                 | 2013 | kg | 0.71  |  |
| Madagascar | FreshwaterFish       | 2013 | kg | 1.49  |  |
| Madagascar | Honey                | 2013 | kg | 0.19  |  |
| Madagascar | MarineFishOther      | 2013 | kg | 1.32  |  |
| Madagascar | MilkWhole            | 2013 | kg | 24.24 |  |
| Madagascar | Pigmeat              | 2013 | kg | 2.56  |  |
| Madagascar | PoultryMeat          | 2013 | kg | 3.14  |  |
| Madagascar | Whey                 | 2013 | kg | 0.18  |  |
| Malawi     | AquaticPlants        | 2013 | kg | 0     |  |
| Malawi     | BovineMeat           | 2013 | kg | 2.35  |  |
| Malawi     | ButterGhee           | 2013 | kg | 0.01  |  |
| Malawi     | Cephalopods          | 2013 | kg | 0     |  |

|          |                      |      |    |       |  |  |
|----------|----------------------|------|----|-------|--|--|
| Malawi   | Cheese               | 2013 | kg | 0.01  |  |  |
| Malawi   | Cream                | 2013 | kg | 0     |  |  |
| Malawi   | DemersalFish         | 2013 | kg | 0     |  |  |
| Malawi   | Eggs                 | 2013 | kg | 1.08  |  |  |
| Malawi   | FreshwaterFish       | 2013 | kg | 7.09  |  |  |
| Malawi   | Honey                | 2013 | kg | 0     |  |  |
| Malawi   | MarineFishOther      | 2013 | kg | 0.22  |  |  |
| Malawi   | MilkWhole            | 2013 | kg | 7.34  |  |  |
| Malawi   | Pigmeat              | 2013 | kg | 5.45  |  |  |
| Malawi   | PoultryMeat          | 2013 | kg | 1.38  |  |  |
| Malawi   | Whey                 | 2013 | kg | 0     |  |  |
| Malaysia | AquaticAnimalsOthers | 2013 | kg | 0.27  |  |  |
| Malaysia | AquaticPlants        | 2013 | kg | 0     |  |  |
| Malaysia | BovineMeat           | 2013 | kg | 6.52  |  |  |
| Malaysia | ButterGhee           | 2013 | kg | 0.32  |  |  |
| Malaysia | Cephalopods          | 2013 | kg | 2.52  |  |  |
| Malaysia | Cheese               | 2013 | kg | 0.46  |  |  |
| Malaysia | Cream                | 2013 | kg | 0.02  |  |  |
| Malaysia | DemersalFish         | 2013 | kg | 12.1  |  |  |
| Malaysia | Eggs                 | 2013 | kg | 16.57 |  |  |
| Malaysia | FreshwaterFish       | 2013 | kg | 7.34  |  |  |
| Malaysia | Honey                | 2013 | kg | 0.04  |  |  |
| Malaysia | MarineFishOther      | 2013 | kg | 10.93 |  |  |
| Malaysia | MilkWhole            | 2013 | kg | 4.13  |  |  |
| Malaysia | Pigmeat              | 2013 | kg | 7.76  |  |  |
| Malaysia | PoultryMeat          | 2013 | kg | 41.01 |  |  |
| Malaysia | Whey                 | 2013 | kg | 0     |  |  |
| Maldives | AquaticAnimalsOthers | 2013 | kg | 0.1   |  |  |
| Maldives | AquaticPlants        | 2013 | kg | 0     |  |  |
| Maldives | BovineMeat           | 2013 | kg | 9.44  |  |  |
| Maldives | ButterGhee           | 2013 | kg | 2.06  |  |  |
| Maldives | Cephalopods          | 2013 | kg | 0.75  |  |  |
| Maldives | Cheese               | 2013 | kg | 1.42  |  |  |
| Maldives | Cream                | 2013 | kg | 0.23  |  |  |
| Maldives | DemersalFish         | 2013 | kg | 0.3   |  |  |
| Maldives | Eggs                 | 2013 | kg | 10.79 |  |  |
| Maldives | FreshwaterFish       | 2013 | kg | 0.73  |  |  |
| Maldives | Honey                | 2013 | kg | 0.34  |  |  |
| Maldives | MarineFishOther      | 2013 | kg | 15.34 |  |  |
| Maldives | MilkWhole            | 2013 | kg | 78.48 |  |  |
| Maldives | Pigmeat              | 2013 | kg | 1.22  |  |  |
| Maldives | PoultryMeat          | 2013 | kg | 18.47 |  |  |
| Maldives | Whey                 | 2013 | kg | 0     |  |  |
| Mali     | AquaticPlants        | 2013 | kg | 0     |  |  |
| Mali     | BovineMeat           | 2013 | kg | 9.96  |  |  |
| Mali     | ButterGhee           | 2013 | kg | 0.01  |  |  |
| Mali     | Cephalopods          | 2013 | kg | 0     |  |  |
| Mali     | Cheese               | 2013 | kg | 0.02  |  |  |
| Mali     | Cream                | 2013 | kg | 0     |  |  |
| Mali     | DemersalFish         | 2013 | kg | 0.09  |  |  |
| Mali     | Eggs                 | 2013 | kg | 0.91  |  |  |
| Mali     | FreshwaterFish       | 2013 | kg | 6.14  |  |  |
| Mali     | Honey                | 2013 | kg | 0.01  |  |  |
| Mali     | MarineFishOther      | 2013 | kg | 1.2   |  |  |
| Mali     | MilkWhole            | 2013 | kg | 98.14 |  |  |
| Mali     | Pigmeat              | 2013 | kg | 0.17  |  |  |

|            |                      |      |    |        |  |
|------------|----------------------|------|----|--------|--|
| Mali       | PoultryMeat          | 2013 | kg | 3.07   |  |
| Malta      | AquaticAnimalsOthers | 2013 | kg | 0.03   |  |
| Malta      | AquaticPlants        | 2013 | kg | 0      |  |
| Malta      | BovineMeat           | 2013 | kg | 19.22  |  |
| Malta      | ButterGhee           | 2013 | kg | 1.01   |  |
| Malta      | Cephalopods          | 2013 | kg | 1.17   |  |
| Malta      | Cheese               | 2013 | kg | 13.97  |  |
| Malta      | Cream                | 2013 | kg | 0.26   |  |
| Malta      | DemersalFish         | 2013 | kg | 3.34   |  |
| Malta      | Eggs                 | 2013 | kg | 11.64  |  |
| Malta      | FreshwaterFish       | 2013 | kg | 3.14   |  |
| Malta      | Honey                | 2013 | kg | 0.24   |  |
| Malta      | MarineFishOther      | 2013 | kg | 2.56   |  |
| Malta      | MilkWhole            | 2013 | kg | 85.07  |  |
| Malta      | Pigmeat              | 2013 | kg | 34.24  |  |
| Malta      | PoultryMeat          | 2013 | kg | 26.4   |  |
| Mauritania | AquaticAnimalsOthers | 2013 | kg | 0      |  |
| Mauritania | BovineMeat           | 2013 | kg | 6.52   |  |
| Mauritania | ButterGhee           | 2013 | kg | 0.44   |  |
| Mauritania | Cephalopods          | 2013 | kg | 0.02   |  |
| Mauritania | Cheese               | 2013 | kg | 1.76   |  |
| Mauritania | Cream                | 2013 | kg | 0.16   |  |
| Mauritania | DemersalFish         | 2013 | kg | 0.58   |  |
| Mauritania | Eggs                 | 2013 | kg | 2.13   |  |
| Mauritania | FreshwaterFish       | 2013 | kg | 3.86   |  |
| Mauritania | Honey                | 2013 | kg | 0      |  |
| Mauritania | MarineFishOther      | 2013 | kg | 1.03   |  |
| Mauritania | MilkWhole            | 2013 | kg | 137.84 |  |
| Mauritania | Pigmeat              | 2013 | kg | 0.02   |  |
| Mauritania | PoultryMeat          | 2013 | kg | 5.6    |  |
| Mauritania | Whey                 | 2013 | kg | 0.03   |  |
| Mauritius  | AquaticAnimalsOthers | 2013 | kg | 0.11   |  |
| Mauritius  | AquaticPlants        | 2013 | kg | 0      |  |
| Mauritius  | BovineMeat           | 2013 | kg | 5.99   |  |
| Mauritius  | ButterGhee           | 2013 | kg | 0.91   |  |
| Mauritius  | Cephalopods          | 2013 | kg | 1.32   |  |
| Mauritius  | Cheese               | 2013 | kg | 2.61   |  |
| Mauritius  | Cream                | 2013 | kg | 0.45   |  |
| Mauritius  | DemersalFish         | 2013 | kg | 3.73   |  |
| Mauritius  | Eggs                 | 2013 | kg | 6.32   |  |
| Mauritius  | FreshwaterFish       | 2013 | kg | 0.76   |  |
| Mauritius  | Honey                | 2013 | kg | 0.17   |  |
| Mauritius  | MarineFishOther      | 2013 | kg | 3.3    |  |
| Mauritius  | MilkWhole            | 2013 | kg | 38.44  |  |
| Mauritius  | Pigmeat              | 2013 | kg | 4.08   |  |
| Mauritius  | PoultryMeat          | 2013 | kg | 38.51  |  |
| Mexico     | AquaticAnimalsOthers | 2013 | kg | 0.16   |  |
| Mexico     | AquaticPlants        | 2013 | kg | 0      |  |
| Mexico     | BovineMeat           | 2013 | kg | 15.33  |  |
| Mexico     | ButterGhee           | 2013 | kg | 0.46   |  |
| Mexico     | Cephalopods          | 2013 | kg | 0.32   |  |
| Mexico     | Cheese               | 2013 | kg | 2.13   |  |
| Mexico     | Cream                | 2013 | kg | 0.05   |  |
| Mexico     | DemersalFish         | 2013 | kg | 0.91   |  |
| Mexico     | Eggs                 | 2013 | kg | 18.34  |  |
| Mexico     | FreshwaterFish       | 2013 | kg | 1.23   |  |

|            |                      |      |    |        |  |
|------------|----------------------|------|----|--------|--|
| Mexico     | Honey                | 2013 | kg | 0.19   |  |
| Mexico     | MarineFishOther      | 2013 | kg | 1.77   |  |
| Mexico     | MilkWhole            | 2013 | kg | 74.68  |  |
| Mexico     | Pigmeat              | 2013 | kg | 15.23  |  |
| Mexico     | PoultryMeat          | 2013 | kg | 30.12  |  |
| Mongolia   | AquaticPlants        | 2013 | kg | 0      |  |
| Mongolia   | BovineMeat           | 2013 | kg | 19.95  |  |
| Mongolia   | ButterGhee           | 2013 | kg | 0.42   |  |
| Mongolia   | Cephalopods          | 2013 | kg | 0      |  |
| Mongolia   | Cheese               | 2013 | kg | 1.15   |  |
| Mongolia   | Cream                | 2013 | kg | 0      |  |
| Mongolia   | DemersalFish         | 2013 | kg | 0.07   |  |
| Mongolia   | Eggs                 | 2013 | kg | 2.23   |  |
| Mongolia   | FreshwaterFish       | 2013 | kg | 0      |  |
| Mongolia   | Honey                | 2013 | kg | 0.05   |  |
| Mongolia   | MarineFishOther      | 2013 | kg | 0.52   |  |
| Mongolia   | MilkWhole            | 2013 | kg | 125.66 |  |
| Mongolia   | Pigmeat              | 2013 | kg | 0.47   |  |
| Mongolia   | PoultryMeat          | 2013 | kg | 3.04   |  |
| Montenegro | AquaticAnimalsOthers | 2013 | kg | 0.06   |  |
| Montenegro | BovineMeat           | 2013 | kg | 12.59  |  |
| Montenegro | ButterGhee           | 2013 | kg | 2.2    |  |
| Montenegro | Cephalopods          | 2013 | kg | 0.89   |  |
| Montenegro | Cheese               | 2013 | kg | 17.24  |  |
| Montenegro | Cream                | 2013 | kg | 0      |  |
| Montenegro | DemersalFish         | 2013 | kg | 2.57   |  |
| Montenegro | Eggs                 | 2013 | kg | 11.6   |  |
| Montenegro | FreshwaterFish       | 2013 | kg | 3.06   |  |
| Montenegro | Honey                | 2013 | kg | 1.1    |  |
| Montenegro | MarineFishOther      | 2013 | kg | 0.94   |  |
| Montenegro | MilkWhole            | 2013 | kg | 173.9  |  |
| Montenegro | Pigmeat              | 2013 | kg | 53.04  |  |
| Montenegro | PoultryMeat          | 2013 | kg | 15.92  |  |
| Morocco    | AquaticAnimalsOthers | 2013 | kg | 0      |  |
| Morocco    | AquaticPlants        | 2013 | kg | 0      |  |
| Morocco    | BovineMeat           | 2013 | kg | 8.04   |  |
| Morocco    | ButterGhee           | 2013 | kg | 2.04   |  |
| Morocco    | Cephalopods          | 2013 | kg | 0.08   |  |
| Morocco    | Cheese               | 2013 | kg | 0.97   |  |
| Morocco    | Cream                | 2013 | kg | 0.02   |  |
| Morocco    | DemersalFish         | 2013 | kg | 1.82   |  |
| Morocco    | Eggs                 | 2013 | kg | 6.68   |  |
| Morocco    | FreshwaterFish       | 2013 | kg | 0.6    |  |
| Morocco    | Honey                | 2013 | kg | 0.21   |  |
| Morocco    | MarineFishOther      | 2013 | kg | 1.42   |  |
| Morocco    | MilkWhole            | 2013 | kg | 19.02  |  |
| Morocco    | Pigmeat              | 2013 | kg | 0.01   |  |
| Morocco    | PoultryMeat          | 2013 | kg | 20.77  |  |
| Mozambique | AquaticAnimalsOthers | 2013 | kg | 0      |  |
| Mozambique | AquaticPlants        | 2013 | kg | 0      |  |
| Mozambique | BovineMeat           | 2013 | kg | 1.04   |  |
| Mozambique | ButterGhee           | 2013 | kg | 0.01   |  |
| Mozambique | Cephalopods          | 2013 | kg | 0.04   |  |
| Mozambique | Cheese               | 2013 | kg | 0.03   |  |
| Mozambique | Cream                | 2013 | kg | 0.02   |  |
| Mozambique | DemersalFish         | 2013 | kg | 0.03   |  |

|             |                      |      |    |       |  |
|-------------|----------------------|------|----|-------|--|
| Mozambique  | Eggs                 | 2013 | kg | 1.7   |  |
| Mozambique  | FreshwaterFish       | 2013 | kg | 2.81  |  |
| Mozambique  | Honey                | 2013 | kg | 0.02  |  |
| Mozambique  | MarineFishOther      | 2013 | kg | 4.83  |  |
| Mozambique  | MilkWhole            | 2013 | kg | 3.98  |  |
| Mozambique  | Pigmeat              | 2013 | kg | 5.13  |  |
| Mozambique  | PoultryMeat          | 2013 | kg | 1.41  |  |
| Myanmar     | AquaticAnimalsOthers | 2013 | kg | 0.01  |  |
| Myanmar     | AquaticPlants        | 2013 | kg | 0     |  |
| Myanmar     | BovineMeat           | 2013 | kg | 4.94  |  |
| Myanmar     | ButterGhee           | 2013 | kg | 0.58  |  |
| Myanmar     | Cephalopods          | 2013 | kg | 0     |  |
| Myanmar     | Cheese               | 2013 | kg | 1.63  |  |
| Myanmar     | Cream                | 2013 | kg | 0     |  |
| Myanmar     | DemersalFish         | 2013 | kg | 0.01  |  |
| Myanmar     | Eggs                 | 2013 | kg | 6.45  |  |
| Myanmar     | FreshwaterFish       | 2013 | kg | 25.77 |  |
| Myanmar     | Honey                | 2013 | kg | 0.01  |  |
| Myanmar     | MarineFishOther      | 2013 | kg | 28.19 |  |
| Myanmar     | MilkWhole            | 2013 | kg | 17.04 |  |
| Myanmar     | Pigmeat              | 2013 | kg | 11.31 |  |
| Myanmar     | PoultryMeat          | 2013 | kg | 21.87 |  |
| Namibia     | AquaticAnimalsOthers | 2013 | kg | 0     |  |
| Namibia     | AquaticPlants        | 2013 | kg | 0     |  |
| Namibia     | BovineMeat           | 2013 | kg | 3.75  |  |
| Namibia     | ButterGhee           | 2013 | kg | 0.91  |  |
| Namibia     | Cephalopods          | 2013 | kg | 0.26  |  |
| Namibia     | Cheese               | 2013 | kg | 1.35  |  |
| Namibia     | Cream                | 2013 | kg | 0     |  |
| Namibia     | DemersalFish         | 2013 | kg | 5.24  |  |
| Namibia     | Eggs                 | 2013 | kg | 1.63  |  |
| Namibia     | FreshwaterFish       | 2013 | kg | 1.36  |  |
| Namibia     | Honey                | 2013 | kg | 0.02  |  |
| Namibia     | MarineFishOther      | 2013 | kg | 0.44  |  |
| Namibia     | MilkWhole            | 2013 | kg | 48.12 |  |
| Namibia     | Pigmeat              | 2013 | kg | 4.21  |  |
| Namibia     | PoultryMeat          | 2013 | kg | 12.19 |  |
| Namibia     | Whey                 | 2013 | kg | 0.05  |  |
| Nepal       | AquaticPlants        | 2013 | kg | 0     |  |
| Nepal       | BovineMeat           | 2013 | kg | 7.89  |  |
| Nepal       | ButterGhee           | 2013 | kg | 0.96  |  |
| Nepal       | Cephalopods          | 2013 | kg | 0     |  |
| Nepal       | Cheese               | 2013 | kg | 0.01  |  |
| Nepal       | DemersalFish         | 2013 | kg | 0.02  |  |
| Nepal       | Eggs                 | 2013 | kg | 1.42  |  |
| Nepal       | FreshwaterFish       | 2013 | kg | 1.89  |  |
| Nepal       | Honey                | 2013 | kg | 0.06  |  |
| Nepal       | MarineFishOther      | 2013 | kg | 0.25  |  |
| Nepal       | MilkWhole            | 2013 | kg | 40.69 |  |
| Nepal       | Pigmeat              | 2013 | kg | 0.67  |  |
| Nepal       | PoultryMeat          | 2013 | kg | 1.56  |  |
| Nepal       | Whey                 | 2013 | kg | 0.04  |  |
| Netherlands | AquaticAnimalsOthers | 2013 | kg | 0.21  |  |
| Netherlands | AquaticPlants        | 2013 | kg | 0     |  |
| Netherlands | BovineMeat           | 2013 | kg | 17.67 |  |
| Netherlands | ButterGhee           | 2013 | kg | 1.28  |  |

|              |                      |      |    |        |  |
|--------------|----------------------|------|----|--------|--|
| Netherlands  | Cephalopods          | 2013 | kg | 0.29   |  |
| Netherlands  | Cheese               | 2013 | kg | 17.69  |  |
| Netherlands  | Cream                | 2013 | kg | 0.05   |  |
| Netherlands  | DemersalFish         | 2013 | kg | 9.87   |  |
| Netherlands  | Eggs                 | 2013 | kg | 14.03  |  |
| Netherlands  | FreshwaterFish       | 2013 | kg | 2.93   |  |
| Netherlands  | Honey                | 2013 | kg | 0.59   |  |
| Netherlands  | MarineFishOther      | 2013 | kg | 0.01   |  |
| Netherlands  | MilkWhole            | 2013 | kg | 150.34 |  |
| Netherlands  | Pigmeat              | 2013 | kg | 36.36  |  |
| Netherlands  | PoultryMeat          | 2013 | kg | 23.9   |  |
| Netherlands  | Whey                 | 2013 | kg | 0      |  |
| NewCaledonia | AquaticAnimalsOthers | 2013 | kg | 0.61   |  |
| NewCaledonia | AquaticPlants        | 2013 | kg | 0      |  |
| NewCaledonia | BovineMeat           | 2013 | kg | 16.07  |  |
| NewCaledonia | ButterGhee           | 2013 | kg | 2.41   |  |
| NewCaledonia | Cephalopods          | 2013 | kg | 0.38   |  |
| NewCaledonia | Cheese               | 2013 | kg | 6.97   |  |
| NewCaledonia | Cream                | 2013 | kg | 9.14   |  |
| NewCaledonia | DemersalFish         | 2013 | kg | 0.66   |  |
| NewCaledonia | Eggs                 | 2013 | kg | 8.85   |  |
| NewCaledonia | FreshwaterFish       | 2013 | kg | 0.55   |  |
| NewCaledonia | Honey                | 2013 | kg | 0.42   |  |
| NewCaledonia | MarineFishOther      | 2013 | kg | 4.7    |  |
| NewCaledonia | MilkWhole            | 2013 | kg | 51.39  |  |
| NewCaledonia | Pigmeat              | 2013 | kg | 19.9   |  |
| NewCaledonia | PoultryMeat          | 2013 | kg | 44.36  |  |
| NewCaledonia | Whey                 | 2013 | kg | 1.27   |  |
| NewZealand   | AquaticAnimalsOthers | 2013 | kg | 0.23   |  |
| NewZealand   | AquaticPlants        | 2013 | kg | 0      |  |
| NewZealand   | BovineMeat           | 2013 | kg | 22.49  |  |
| NewZealand   | ButterGhee           | 2013 | kg | 9.25   |  |
| NewZealand   | Cephalopods          | 2013 | kg | 0.33   |  |
| NewZealand   | Cheese               | 2013 | kg | 8.69   |  |
| NewZealand   | Cream                | 2013 | kg | 0.19   |  |
| NewZealand   | DemersalFish         | 2013 | kg | 9.38   |  |
| NewZealand   | Eggs                 | 2013 | kg | 9.91   |  |
| NewZealand   | FreshwaterFish       | 2013 | kg | 2.08   |  |
| NewZealand   | Honey                | 2013 | kg | 2.02   |  |
| NewZealand   | MarineFishOther      | 2013 | kg | 0.01   |  |
| NewZealand   | MilkWhole            | 2013 | kg | 48.99  |  |
| NewZealand   | Pigmeat              | 2013 | kg | 22.29  |  |
| NewZealand   | PoultryMeat          | 2013 | kg | 34.98  |  |
| Nicaragua    | AquaticAnimalsOthers | 2013 | kg | 0.06   |  |
| Nicaragua    | AquaticPlants        | 2013 | kg | 0      |  |
| Nicaragua    | BovineMeat           | 2013 | kg | 4.73   |  |
| Nicaragua    | ButterGhee           | 2013 | kg | 0.14   |  |
| Nicaragua    | Cephalopods          | 2013 | kg | 0      |  |
| Nicaragua    | Cheese               | 2013 | kg | 3.03   |  |
| Nicaragua    | Cream                | 2013 | kg | 0      |  |
| Nicaragua    | DemersalFish         | 2013 | kg | 0.1    |  |
| Nicaragua    | Eggs                 | 2013 | kg | 4.9    |  |
| Nicaragua    | FreshwaterFish       | 2013 | kg | 0.16   |  |
| Nicaragua    | Honey                | 2013 | kg | 0.02   |  |
| Nicaragua    | MarineFishOther      | 2013 | kg | 0.1    |  |
| Nicaragua    | MilkWhole            | 2013 | kg | 59.25  |  |

|           |                      |      |    |       |  |
|-----------|----------------------|------|----|-------|--|
| Nicaragua | Pigmeat              | 2013 | kg | 3.38  |  |
| Nicaragua | PoultryMeat          | 2013 | kg | 21.31 |  |
| Nicaragua | Whey                 | 2013 | kg | 0     |  |
| Niger     | AquaticPlants        | 2013 | kg | 0     |  |
| Niger     | BovineMeat           | 2013 | kg | 8.97  |  |
| Niger     | ButterGhee           | 2013 | kg | 0.79  |  |
| Niger     | Cephalopods          | 2013 | kg | 0     |  |
| Niger     | Cheese               | 2013 | kg | 3.31  |  |
| Niger     | Cream                | 2013 | kg | 0     |  |
| Niger     | DemersalFish         | 2013 | kg | 0.01  |  |
| Niger     | Eggs                 | 2013 | kg | 0.3   |  |
| Niger     | FreshwaterFish       | 2013 | kg | 2.57  |  |
| Niger     | Honey                | 2013 | kg | 0     |  |
| Niger     | MarineFishOther      | 2013 | kg | 0.05  |  |
| Niger     | MilkWhole            | 2013 | kg | 21.93 |  |
| Niger     | Pigmeat              | 2013 | kg | 0.09  |  |
| Niger     | PoultryMeat          | 2013 | kg | 1.08  |  |
| Nigeria   | AquaticPlants        | 2013 | kg | 0     |  |
| Nigeria   | BovineMeat           | 2013 | kg | 2.33  |  |
| Nigeria   | ButterGhee           | 2013 | kg | 0.1   |  |
| Nigeria   | Cephalopods          | 2013 | kg | 0.01  |  |
| Nigeria   | Cheese               | 2013 | kg | 0.06  |  |
| Nigeria   | Cream                | 2013 | kg | 0     |  |
| Nigeria   | DemersalFish         | 2013 | kg | 7.22  |  |
| Nigeria   | Eggs                 | 2013 | kg | 3.46  |  |
| Nigeria   | FreshwaterFish       | 2013 | kg | 3.01  |  |
| Nigeria   | Honey                | 2013 | kg | 0     |  |
| Nigeria   | MarineFishOther      | 2013 | kg | 0.31  |  |
| Nigeria   | MilkWhole            | 2013 | kg | 5.1   |  |
| Nigeria   | Pigmeat              | 2013 | kg | 1.47  |  |
| Nigeria   | PoultryMeat          | 2013 | kg | 1.73  |  |
| Nigeria   | Whey                 | 2013 | kg | 0.55  |  |
| Norway    | AquaticAnimalsOthers | 2013 | kg | 0     |  |
| Norway    | AquaticPlants        | 2013 | kg | 0     |  |
| Norway    | BovineMeat           | 2013 | kg | 19.83 |  |
| Norway    | ButterGhee           | 2013 | kg | 3.17  |  |
| Norway    | Cephalopods          | 2013 | kg | 0.05  |  |
| Norway    | Cheese               | 2013 | kg | 14.59 |  |
| Norway    | Cream                | 2013 | kg | 7.14  |  |
| Norway    | DemersalFish         | 2013 | kg | 27.2  |  |
| Norway    | Eggs                 | 2013 | kg | 11.41 |  |
| Norway    | FreshwaterFish       | 2013 | kg | 6.08  |  |
| Norway    | Honey                | 2013 | kg | 0.39  |  |
| Norway    | MarineFishOther      | 2013 | kg | 0.05  |  |
| Norway    | MilkWhole            | 2013 | kg | 70.99 |  |
| Norway    | Pigmeat              | 2013 | kg | 23.51 |  |
| Norway    | PoultryMeat          | 2013 | kg | 21.01 |  |
| Oman      | AquaticPlants        | 2013 | kg | 0     |  |
| Oman      | BovineMeat           | 2013 | kg | 15.1  |  |
| Oman      | ButterGhee           | 2013 | kg | 0.54  |  |
| Oman      | Cephalopods          | 2013 | kg | 0.19  |  |
| Oman      | Cheese               | 2013 | kg | 4.36  |  |
| Oman      | Cream                | 2013 | kg | 0.08  |  |
| Oman      | DemersalFish         | 2013 | kg | 13.65 |  |
| Oman      | Eggs                 | 2013 | kg | 7.8   |  |
| Oman      | FreshwaterFish       | 2013 | kg | 0.18  |  |



|          |                      |      |    |        |  |
|----------|----------------------|------|----|--------|--|
| Oman     | Honey                | 2013 | kg | 0.47   |  |
| Oman     | MarineFishOther      | 2013 | kg | 2.14   |  |
| Oman     | MilkWhole            | 2013 | kg | 113.91 |  |
| Oman     | Pigmeat              | 2013 | kg | 0.01   |  |
| Oman     | PoultryMeat          | 2013 | kg | 31.51  |  |
| Pakistan | AquaticPlants        | 2013 | kg | 0      |  |
| Pakistan | BovineMeat           | 2013 | kg | 8.82   |  |
| Pakistan | ButterGhee           | 2013 | kg | 3.9    |  |
| Pakistan | Cephalopods          | 2013 | kg | 0.04   |  |
| Pakistan | Cheese               | 2013 | kg | 0.01   |  |
| Pakistan | Cream                | 2013 | kg | 0.02   |  |
| Pakistan | DemersalFish         | 2013 | kg | 0.19   |  |
| Pakistan | Eggs                 | 2013 | kg | 2.95   |  |
| Pakistan | FreshwaterFish       | 2013 | kg | 1.37   |  |
| Pakistan | Honey                | 2013 | kg | 0.02   |  |
| Pakistan | MarineFishOther      | 2013 | kg | 0      |  |
| Pakistan | MilkWhole            | 2013 | kg | 107.81 |  |
| Pakistan | Pigmeat              | 2013 | kg | 0      |  |
| Pakistan | PoultryMeat          | 2013 | kg | 5.01   |  |
| Panama   | AquaticAnimalsOthers | 2013 | kg | 0.01   |  |
| Panama   | AquaticPlants        | 2013 | kg | 0      |  |
| Panama   | BovineMeat           | 2013 | kg | 20.4   |  |
| Panama   | ButterGhee           | 2013 | kg | 0.55   |  |
| Panama   | Cephalopods          | 2013 | kg | 0.48   |  |
| Panama   | Cheese               | 2013 | kg | 5.92   |  |
| Panama   | Cream                | 2013 | kg | 0.05   |  |
| Panama   | DemersalFish         | 2013 | kg | 1.92   |  |
| Panama   | Eggs                 | 2013 | kg | 4.53   |  |
| Panama   | FreshwaterFish       | 2013 | kg | 0.72   |  |
| Panama   | Honey                | 2013 | kg | 0.03   |  |
| Panama   | MarineFishOther      | 2013 | kg | 0.92   |  |
| Panama   | MilkWhole            | 2013 | kg | 48.67  |  |
| Panama   | Pigmeat              | 2013 | kg | 13.48  |  |
| Panama   | PoultryMeat          | 2013 | kg | 30.81  |  |
| Paraguay | AquaticPlants        | 2013 | kg | 0      |  |
| Paraguay | BovineMeat           | 2013 | kg | 19.81  |  |
| Paraguay | ButterGhee           | 2013 | kg | 0.12   |  |
| Paraguay | Cephalopods          | 2013 | kg | 0      |  |
| Paraguay | Cheese               | 2013 | kg | 0.27   |  |
| Paraguay | Cream                | 2013 | kg | 0      |  |
| Paraguay | DemersalFish         | 2013 | kg | 0      |  |
| Paraguay | Eggs                 | 2013 | kg | 18.83  |  |
| Paraguay | FreshwaterFish       | 2013 | kg | 3.23   |  |
| Paraguay | Honey                | 2013 | kg | 0.26   |  |
| Paraguay | MarineFishOther      | 2013 | kg | 0.13   |  |
| Paraguay | MilkWhole            | 2013 | kg | 71.33  |  |
| Paraguay | Pigmeat              | 2013 | kg | 26.24  |  |
| Paraguay | PoultryMeat          | 2013 | kg | 6.39   |  |
| Peru     | AquaticAnimalsOthers | 2013 | kg | 0.02   |  |
| Peru     | AquaticPlants        | 2013 | kg | 0      |  |
| Peru     | BovineMeat           | 2013 | kg | 4.69   |  |
| Peru     | ButterGhee           | 2013 | kg | 0.16   |  |
| Peru     | Cephalopods          | 2013 | kg | 0.28   |  |
| Peru     | Cheese               | 2013 | kg | 0.85   |  |
| Peru     | Cream                | 2013 | kg | 0.03   |  |
| Peru     | DemersalFish         | 2013 | kg | 1.45   |  |

|             |                      |      |    |       |  |  |
|-------------|----------------------|------|----|-------|--|--|
| Peru        | Eggs                 | 2013 | kg | 8.76  |  |  |
| Peru        | FreshwaterFish       | 2013 | kg | 1.96  |  |  |
| Peru        | Honey                | 2013 | kg | 0.05  |  |  |
| Peru        | MarineFishOther      | 2013 | kg | 0.36  |  |  |
| Peru        | MeatAquaticMammals   | 2013 | kg | 0     |  |  |
| Peru        | MilkWhole            | 2013 | kg | 48.29 |  |  |
| Peru        | Pigmeat              | 2013 | kg | 3.85  |  |  |
| Peru        | PoultryMeat          | 2013 | kg | 11.72 |  |  |
| Peru        | Whey                 | 2013 | kg | 3.81  |  |  |
| Philippines | AquaticAnimalsOthers | 2013 | kg | 0.01  |  |  |
| Philippines | AquaticPlants        | 2013 | kg | 0     |  |  |
| Philippines | BovineMeat           | 2013 | kg | 4.06  |  |  |
| Philippines | ButterGhee           | 2013 | kg | 0.16  |  |  |
| Philippines | Cephalopods          | 2013 | kg | 0.68  |  |  |
| Philippines | Cheese               | 2013 | kg | 0.12  |  |  |
| Philippines | Cream                | 2013 | kg | 0.02  |  |  |
| Philippines | DemersalFish         | 2013 | kg | 4.24  |  |  |
| Philippines | Eggs                 | 2013 | kg | 4.02  |  |  |
| Philippines | FreshwaterFish       | 2013 | kg | 7.85  |  |  |
| Philippines | Honey                | 2013 | kg | 0     |  |  |
| Philippines | MarineFishOther      | 2013 | kg | 0.26  |  |  |
| Philippines | MilkWhole            | 2013 | kg | 2.8   |  |  |
| Philippines | Pigmeat              | 2013 | kg | 18.4  |  |  |
| Philippines | PoultryMeat          | 2013 | kg | 11.91 |  |  |
| Poland      | AquaticAnimalsOthers | 2013 | kg | 0     |  |  |
| Poland      | AquaticPlants        | 2013 | kg | 0     |  |  |
| Poland      | BovineMeat           | 2013 | kg | 2.32  |  |  |
| Poland      | ButterGhee           | 2013 | kg | 3.97  |  |  |
| Poland      | Cephalopods          | 2013 | kg | 0     |  |  |
| Poland      | Cheese               | 2013 | kg | 15.82 |  |  |
| Poland      | Cream                | 2013 | kg | 7.25  |  |  |
| Poland      | DemersalFish         | 2013 | kg | 4.13  |  |  |
| Poland      | Eggs                 | 2013 | kg | 7.53  |  |  |
| Poland      | FreshwaterFish       | 2013 | kg | 2     |  |  |
| Poland      | Honey                | 2013 | kg | 0.14  |  |  |
| Poland      | MarineFishOther      | 2013 | kg | 0     |  |  |
| Poland      | MilkWhole            | 2013 | kg | 37.92 |  |  |
| Poland      | Pigmeat              | 2013 | kg | 46.19 |  |  |
| Poland      | PoultryMeat          | 2013 | kg | 27.41 |  |  |
| Poland      | Whey                 | 2013 | kg | 0.03  |  |  |
| Portugal    | AquaticAnimalsOthers | 2013 | kg | 0.01  |  |  |
| Portugal    | AquaticPlants        | 2013 | kg | 0     |  |  |
| Portugal    | BovineMeat           | 2013 | kg | 16.45 |  |  |
| Portugal    | ButterGhee           | 2013 | kg | 2.21  |  |  |
| Portugal    | Cephalopods          | 2013 | kg | 2.23  |  |  |
| Portugal    | Cheese               | 2013 | kg | 9.36  |  |  |
| Portugal    | Cream                | 2013 | kg | 1.83  |  |  |
| Portugal    | DemersalFish         | 2013 | kg | 33.45 |  |  |
| Portugal    | Eggs                 | 2013 | kg | 9.05  |  |  |
| Portugal    | FreshwaterFish       | 2013 | kg | 3.19  |  |  |
| Portugal    | Honey                | 2013 | kg | 0.91  |  |  |
| Portugal    | MarineFishOther      | 2013 | kg | 1.62  |  |  |
| Portugal    | MilkWhole            | 2013 | kg | 47.05 |  |  |
| Portugal    | Pigmeat              | 2013 | kg | 37.91 |  |  |
| Portugal    | PoultryMeat          | 2013 | kg | 30.14 |  |  |
| S.Korea     | AquaticAnimalsOthers | 2013 | kg | 0.69  |  |  |

|         |                      |      |    |        |  |
|---------|----------------------|------|----|--------|--|
| S.Korea | AquaticPlants        | 2013 | kg | 22.41  |  |
| S.Korea | BovineMeat           | 2013 | kg | 14.53  |  |
| S.Korea | ButterGhee           | 2013 | kg | 1.3    |  |
| S.Korea | Cephalopods          | 2013 | kg | 6.7    |  |
| S.Korea | Cheese               | 2013 | kg | 1.69   |  |
| S.Korea | Cream                | 2013 | kg | 0.17   |  |
| S.Korea | DemersalFish         | 2013 | kg | 17.45  |  |
| S.Korea | Eggs                 | 2013 | kg | 11.24  |  |
| S.Korea | FreshwaterFish       | 2013 | kg | 1.34   |  |
| S.Korea | Honey                | 2013 | kg | 0.51   |  |
| S.Korea | MarineFishOther      | 2013 | kg | 0.45   |  |
| S.Korea | MilkWhole            | 2013 | kg | 7.3    |  |
| S.Korea | Pigmeat              | 2013 | kg | 32.76  |  |
| S.Korea | PoultryMeat          | 2013 | kg | 16     |  |
| Moldova | AquaticAnimalsOthers | 2013 | kg | 0      |  |
| Moldova | AquaticPlants        | 2013 | kg | 0      |  |
| Moldova | BovineMeat           | 2013 | kg | 1.56   |  |
| Moldova | ButterGhee           | 2013 | kg | 1.26   |  |
| Moldova | Cephalopods          | 2013 | kg | 0.03   |  |
| Moldova | Cheese               | 2013 | kg | 2.96   |  |
| Moldova | Cream                | 2013 | kg | 0.31   |  |
| Moldova | DemersalFish         | 2013 | kg | 1.95   |  |
| Moldova | Eggs                 | 2013 | kg | 9.79   |  |
| Moldova | FreshwaterFish       | 2013 | kg | 3.89   |  |
| Moldova | Honey                | 2013 | kg | 0.7    |  |
| Moldova | MarineFishOther      | 2013 | kg | 1.67   |  |
| Moldova | MilkWhole            | 2013 | kg | 110.05 |  |
| Moldova | Pigmeat              | 2013 | kg | 19.83  |  |
| Moldova | PoultryMeat          | 2013 | kg | 17.93  |  |
| Romania | AquaticAnimalsOthers | 2013 | kg | 0.01   |  |
| Romania | AquaticPlants        | 2013 | kg | 0      |  |
| Romania | BovineMeat           | 2013 | kg | 4.78   |  |
| Romania | ButterGhee           | 2013 | kg | 0.66   |  |
| Romania | Cephalopods          | 2013 | kg | 0.02   |  |
| Romania | Cheese               | 2013 | kg | 5.22   |  |
| Romania | Cream                | 2013 | kg | 0.08   |  |
| Romania | DemersalFish         | 2013 | kg | 0.65   |  |
| Romania | Eggs                 | 2013 | kg | 12.94  |  |
| Romania | FreshwaterFish       | 2013 | kg | 2.37   |  |
| Romania | Honey                | 2013 | kg | 0.78   |  |
| Romania | MarineFishOther      | 2013 | kg | 0.52   |  |
| Romania | MilkWhole            | 2013 | kg | 202.62 |  |
| Romania | Pigmeat              | 2013 | kg | 25.31  |  |
| Romania | PoultryMeat          | 2013 | kg | 15.38  |  |
| Russia  | AquaticAnimalsOthers | 2013 | kg | 0.01   |  |
| Russia  | AquaticPlants        | 2013 | kg | 0      |  |
| Russia  | BovineMeat           | 2013 | kg | 16.98  |  |
| Russia  | ButterGhee           | 2013 | kg | 2.58   |  |
| Russia  | Cephalopods          | 2013 | kg | 0.77   |  |
| Russia  | Cheese               | 2013 | kg | 7.13   |  |
| Russia  | Cream                | 2013 | kg | 2.52   |  |
| Russia  | DemersalFish         | 2013 | kg | 7.6    |  |
| Russia  | Eggs                 | 2013 | kg | 15.43  |  |
| Russia  | FreshwaterFish       | 2013 | kg | 6.86   |  |
| Russia  | Honey                | 2013 | kg | 0.48   |  |
| Russia  | MarineFishOther      | 2013 | kg | 0      |  |

|                              |                      |      |    |       |  |  |
|------------------------------|----------------------|------|----|-------|--|--|
| Russia                       | MilkWhole            | 2013 | kg | 101.5 |  |  |
| Russia                       | Pigmeat              | 2013 | kg | 25.66 |  |  |
| Russia                       | PoultryMeat          | 2013 | kg | 27.5  |  |  |
| Rwanda                       | BovineMeat           | 2013 | kg | 2.53  |  |  |
| Rwanda                       | ButterGhee           | 2013 | kg | 0.12  |  |  |
| Rwanda                       | Cephalopods          | 2013 | kg | 0     |  |  |
| Rwanda                       | Cheese               | 2013 | kg | 0     |  |  |
| Rwanda                       | Cream                | 2013 | kg | 0     |  |  |
| Rwanda                       | DemersalFish         | 2013 | kg | 0.02  |  |  |
| Rwanda                       | Eggs                 | 2013 | kg | 0.16  |  |  |
| Rwanda                       | FreshwaterFish       | 2013 | kg | 1.48  |  |  |
| Rwanda                       | Honey                | 2013 | kg | 0.04  |  |  |
| Rwanda                       | MarineFishOther      | 2013 | kg | 2.19  |  |  |
| Rwanda                       | MilkWhole            | 2013 | kg | 4.1   |  |  |
| Rwanda                       | Pigmeat              | 2013 | kg | 0.76  |  |  |
| Rwanda                       | PoultryMeat          | 2013 | kg | 1.34  |  |  |
| SaintKittsandNevis           | AquaticPlants        | 2013 | kg | 0     |  |  |
| SaintKittsandNevis           | BovineMeat           | 2013 | kg | 10.06 |  |  |
| SaintKittsandNevis           | ButterGhee           | 2013 | kg | 0.41  |  |  |
| SaintKittsandNevis           | Cephalopods          | 2013 | kg | 0.02  |  |  |
| SaintKittsandNevis           | Cheese               | 2013 | kg | 4.06  |  |  |
| SaintKittsandNevis           | Cream                | 2013 | kg | 0     |  |  |
| SaintKittsandNevis           | DemersalFish         | 2013 | kg | 4.33  |  |  |
| SaintKittsandNevis           | Eggs                 | 2013 | kg | 3.52  |  |  |
| SaintKittsandNevis           | FreshwaterFish       | 2013 | kg | 0.66  |  |  |
| SaintKittsandNevis           | MarineFishOther      | 2013 | kg | 17.26 |  |  |
| SaintKittsandNevis           | MilkWhole            | 2013 | kg | 37.51 |  |  |
| SaintKittsandNevis           | Pigmeat              | 2013 | kg | 6.36  |  |  |
| SaintKittsandNevis           | PoultryMeat          | 2013 | kg | 56.7  |  |  |
| SaintLucia                   | AquaticPlants        | 2013 | kg | 0     |  |  |
| SaintLucia                   | BovineMeat           | 2013 | kg | 6.02  |  |  |
| SaintLucia                   | ButterGhee           | 2013 | kg | 0.71  |  |  |
| SaintLucia                   | Cephalopods          | 2013 | kg | 0.15  |  |  |
| SaintLucia                   | Cheese               | 2013 | kg | 4.55  |  |  |
| SaintLucia                   | Cream                | 2013 | kg | 0.32  |  |  |
| SaintLucia                   | DemersalFish         | 2013 | kg | 1.62  |  |  |
| SaintLucia                   | Eggs                 | 2013 | kg | 3.2   |  |  |
| SaintLucia                   | FreshwaterFish       | 2013 | kg | 0.11  |  |  |
| SaintLucia                   | Honey                | 2013 | kg | 0     |  |  |
| SaintLucia                   | MarineFishOther      | 2013 | kg | 7.2   |  |  |
| SaintLucia                   | MilkWhole            | 2013 | kg | 47.8  |  |  |
| SaintLucia                   | Pigmeat              | 2013 | kg | 21.43 |  |  |
| SaintLucia                   | PoultryMeat          | 2013 | kg | 69.52 |  |  |
| SaintVincentandtheGrenadines | AquaticAnimalsOthers | 2013 | kg | 0     |  |  |
| SaintVincentandtheGrenadines | AquaticPlants        | 2013 | kg | 0     |  |  |
| SaintVincentandtheGrenadines | BovineMeat           | 2013 | kg | 9.37  |  |  |
| SaintVincentandtheGrenadines | ButterGhee           | 2013 | kg | 0.19  |  |  |
| SaintVincentandtheGrenadines | Cephalopods          | 2013 | kg | 0     |  |  |
| SaintVincentandtheGrenadines | Cheese               | 2013 | kg | 2.61  |  |  |
| SaintVincentandtheGrenadines | Cream                | 2013 | kg | 0.06  |  |  |
| SaintVincentandtheGrenadines | DemersalFish         | 2013 | kg | 2.22  |  |  |
| SaintVincentandtheGrenadines | Eggs                 | 2013 | kg | 5.32  |  |  |
| SaintVincentandtheGrenadines | FreshwaterFish       | 2013 | kg | 0.17  |  |  |
| SaintVincentandtheGrenadines | Honey                | 2013 | kg | 0     |  |  |
| SaintVincentandtheGrenadines | MarineFishOther      | 2013 | kg | 9.15  |  |  |
| SaintVincentandtheGrenadines | MilkWhole            | 2013 | kg | 47.22 |  |  |

|                              |                      |      |             |       |       |       |
|------------------------------|----------------------|------|-------------|-------|-------|-------|
| SaintVincentandtheGrenadines |                      |      | Pigmeat     | 2013  | kg    | 12.47 |
| SaintVincentandtheGrenadines |                      |      | PoultryMeat | 2013  | kg    | 72.87 |
| Samoa                        | AquaticAnimalsOthers |      | 2013        | kg    | 2.23  |       |
| Samoa                        | AquaticPlants        | 2013 | kg          | 0     |       |       |
| Samoa                        | BovineMeat           | 2013 | kg          | 10.38 |       |       |
| Samoa                        | ButterGhee           | 2013 | kg          | 1.34  |       |       |
| Samoa                        | Cephalopods          | 2013 | kg          | 0.26  |       |       |
| Samoa                        | Cheese               | 2013 | kg          | 0.69  |       |       |
| Samoa                        | Cream                | 2013 | kg          | 0.02  |       |       |
| Samoa                        | DemersalFish         | 2013 | kg          | 0     |       |       |
| Samoa                        | Eggs                 | 2013 | kg          | 2.31  |       |       |
| Samoa                        | FreshwaterFish       | 2013 | kg          | 0.16  |       |       |
| Samoa                        | Honey                | 2013 | kg          | 1.07  |       |       |
| Samoa                        | MarineFishOther      | 2013 | kg          | 4.96  |       |       |
| Samoa                        | MilkWhole            | 2013 | kg          | 29.86 |       |       |
| Samoa                        | Pigmeat              | 2013 | kg          | 23.56 |       |       |
| Samoa                        | PoultryMeat          | 2013 | kg          | 63.81 |       |       |
| SaoTomeandPrincipe           | BovineMeat           |      | 2013        | kg    | 1.25  |       |
| SaoTomeandPrincipe           | ButterGhee           |      | 2013        | kg    | 0.25  |       |
| SaoTomeandPrincipe           | Cephalopods          |      | 2013        | kg    | 0     |       |
| SaoTomeandPrincipe           | Cheese               | 2013 | kg          | 0.17  |       |       |
| SaoTomeandPrincipe           | Cream                | 2013 | kg          | 0     |       |       |
| SaoTomeandPrincipe           | DemersalFish         |      | 2013        | kg    | 5.74  |       |
| SaoTomeandPrincipe           | Eggs                 | 2013 | kg          | 2.84  |       |       |
| SaoTomeandPrincipe           | FreshwaterFish       |      | 2013        | kg    | 0.19  |       |
| SaoTomeandPrincipe           | MarineFishOther      |      | 2013        | kg    | 3.23  |       |
| SaoTomeandPrincipe           | MilkWhole            |      | 2013        | kg    | 11.93 |       |
| SaoTomeandPrincipe           | Pigmeat              |      | 2013        | kg    | 5.55  |       |
| SaoTomeandPrincipe           | PoultryMeat          |      | 2013        | kg    | 9.24  |       |
| SaoTomeandPrincipe           | Whey                 | 2013 | kg          | 0.07  |       |       |
| SaudiArabia                  | AquaticAnimalsOthers |      | 2013        | kg    | 0     |       |
| SaudiArabia                  | AquaticPlants        |      | 2013        | kg    | 0     |       |
| SaudiArabia                  | BovineMeat           | 2013 | kg          | 6.45  |       |       |
| SaudiArabia                  | ButterGhee           | 2013 | kg          | 1.84  |       |       |
| SaudiArabia                  | Cephalopods          | 2013 | kg          | 0.08  |       |       |
| SaudiArabia                  | Cheese               | 2013 | kg          | 6.06  |       |       |
| SaudiArabia                  | Cream                | 2013 | kg          | 2.39  |       |       |
| SaudiArabia                  | DemersalFish         |      | 2013        | kg    | 1.36  |       |
| SaudiArabia                  | Eggs                 | 2013 | kg          | 5.37  |       |       |
| SaudiArabia                  | FreshwaterFish       |      | 2013        | kg    | 4.69  |       |
| SaudiArabia                  | Honey                | 2013 | kg          | 0.44  |       |       |
| SaudiArabia                  | MarineFishOther      |      | 2013        | kg    | 0.72  |       |
| SaudiArabia                  | MilkWhole            | 2013 | kg          | 30.73 |       |       |
| SaudiArabia                  | PoultryMeat          | 2013 | kg          | 49.05 |       |       |
| Senegal                      | AquaticPlants        | 2013 | kg          | 0     |       |       |
| Senegal                      | BovineMeat           | 2013 | kg          | 5.85  |       |       |
| Senegal                      | ButterGhee           | 2013 | kg          | 0.11  |       |       |
| Senegal                      | Cephalopods          | 2013 | kg          | 0.01  |       |       |
| Senegal                      | Cheese               | 2013 | kg          | 0.14  |       |       |
| Senegal                      | Cream                | 2013 | kg          | 0.03  |       |       |
| Senegal                      | DemersalFish         | 2013 | kg          | 5.73  |       |       |
| Senegal                      | Eggs                 | 2013 | kg          | 1.63  |       |       |
| Senegal                      | FreshwaterFish       | 2013 | kg          | 2.44  |       |       |
| Senegal                      | Honey                | 2013 | kg          | 0.22  |       |       |
| Senegal                      | MarineFishOther      | 2013 | kg          | 0.28  |       |       |
| Senegal                      | MilkWhole            | 2013 | kg          | 14.3  |       |       |

|             |                      |      |    |       |  |
|-------------|----------------------|------|----|-------|--|
| Senegal     | Pigmeat              | 2013 | kg | 0.94  |  |
| Senegal     | PoultryMeat          | 2013 | kg | 4.62  |  |
| Senegal     | Whey                 | 2013 | kg | 0.11  |  |
| Serbia      | AquaticAnimalsOthers | 2013 | kg | 0     |  |
| Serbia      | AquaticPlants        | 2013 | kg | 0     |  |
| Serbia      | BovineMeat           | 2013 | kg | 7.05  |  |
| Serbia      | ButterGhee           | 2013 | kg | 0.28  |  |
| Serbia      | Cephalopods          | 2013 | kg | 0.17  |  |
| Serbia      | Cheese               | 2013 | kg | 2.76  |  |
| Serbia      | Cream                | 2013 | kg | 0.12  |  |
| Serbia      | DemersalFish         | 2013 | kg | 1.03  |  |
| Serbia      | Eggs                 | 2013 | kg | 8.89  |  |
| Serbia      | FreshwaterFish       | 2013 | kg | 2.29  |  |
| Serbia      | Honey                | 2013 | kg | 0.55  |  |
| Serbia      | MarineFishOther      | 2013 | kg | 0.28  |  |
| Serbia      | MilkWhole            | 2013 | kg | 115.6 |  |
| Serbia      | Pigmeat              | 2013 | kg | 32.04 |  |
| Serbia      | PoultryMeat          | 2013 | kg | 10.64 |  |
| Serbia      | Whey                 | 2013 | kg | 0     |  |
| SierraLeone | AquaticPlants        | 2013 | kg | 0     |  |
| SierraLeone | BovineMeat           | 2013 | kg | 1.99  |  |
| SierraLeone | ButterGhee           | 2013 | kg | 0     |  |
| SierraLeone | Cephalopods          | 2013 | kg | 0.03  |  |
| SierraLeone | Cheese               | 2013 | kg | 0.07  |  |
| SierraLeone | Cream                | 2013 | kg | 0     |  |
| SierraLeone | DemersalFish         | 2013 | kg | 7.87  |  |
| SierraLeone | Eggs                 | 2013 | kg | 1.92  |  |
| SierraLeone | FreshwaterFish       | 2013 | kg | 3.54  |  |
| SierraLeone | Honey                | 2013 | kg | 0.14  |  |
| SierraLeone | MarineFishOther      | 2013 | kg | 1     |  |
| SierraLeone | MilkWhole            | 2013 | kg | 6.32  |  |
| SierraLeone | Pigmeat              | 2013 | kg | 1.22  |  |
| SierraLeone | PoultryMeat          | 2013 | kg | 4.97  |  |
| Slovakia    | AquaticAnimalsOthers | 2013 | kg | 0     |  |
| Slovakia    | AquaticPlants        | 2013 | kg | 0     |  |
| Slovakia    | BovineMeat           | 2013 | kg | 5.19  |  |
| Slovakia    | ButterGhee           | 2013 | kg | 2.65  |  |
| Slovakia    | Cephalopods          | 2013 | kg | 0.01  |  |
| Slovakia    | Cheese               | 2013 | kg | 11.27 |  |
| Slovakia    | Cream                | 2013 | kg | 1.41  |  |
| Slovakia    | DemersalFish         | 2013 | kg | 3.27  |  |
| Slovakia    | Eggs                 | 2013 | kg | 16.05 |  |
| Slovakia    | FreshwaterFish       | 2013 | kg | 1.95  |  |
| Slovakia    | Honey                | 2013 | kg | 1.1   |  |
| Slovakia    | MarineFishOther      | 2013 | kg | 0.35  |  |
| Slovakia    | MilkWhole            | 2013 | kg | 43.16 |  |
| Slovakia    | Pigmeat              | 2013 | kg | 31.78 |  |
| Slovakia    | PoultryMeat          | 2013 | kg | 15.13 |  |
| Slovenia    | AquaticAnimalsOthers | 2013 | kg | 0.07  |  |
| Slovenia    | AquaticPlants        | 2013 | kg | 0     |  |
| Slovenia    | BovineMeat           | 2013 | kg | 18.43 |  |
| Slovenia    | ButterGhee           | 2013 | kg | 2.65  |  |
| Slovenia    | Cephalopods          | 2013 | kg | 1.57  |  |
| Slovenia    | Cheese               | 2013 | kg | 13.99 |  |
| Slovenia    | Cream                | 2013 | kg | 8.47  |  |
| Slovenia    | DemersalFish         | 2013 | kg | 2.33  |  |

|                |                      |      |    |       |  |  |
|----------------|----------------------|------|----|-------|--|--|
| Slovenia       | Eggs                 | 2013 | kg | 9.36  |  |  |
| Slovenia       | FreshwaterFish       | 2013 | kg | 2.37  |  |  |
| Slovenia       | Honey                | 2013 | kg | 1.61  |  |  |
| Slovenia       | MarineFishOther      | 2013 | kg | 0.35  |  |  |
| Slovenia       | MilkWhole            | 2013 | kg | 32.06 |  |  |
| Slovenia       | Pigmeat              | 2013 | kg | 28.19 |  |  |
| Slovenia       | PoultryMeat          | 2013 | kg | 23.46 |  |  |
| SolomonIslands | AquaticAnimalsOthers | 2013 | kg | 0     |  |  |
| SolomonIslands | AquaticPlants        | 2013 | kg | 0     |  |  |
| SolomonIslands | BovineMeat           | 2013 | kg | 5.57  |  |  |
| SolomonIslands | ButterGhee           | 2013 | kg | 0.07  |  |  |
| SolomonIslands | Cephalopods          | 2013 | kg | 0     |  |  |
| SolomonIslands | Cheese               | 2013 | kg | 0.09  |  |  |
| SolomonIslands | Cream                | 2013 | kg | 0.02  |  |  |
| SolomonIslands | DemersalFish         | 2013 | kg | 0.02  |  |  |
| SolomonIslands | Eggs                 | 2013 | kg | 1.28  |  |  |
| SolomonIslands | FreshwaterFish       | 2013 | kg | 0     |  |  |
| SolomonIslands | MarineFishOther      | 2013 | kg | 19.01 |  |  |
| SolomonIslands | MilkWhole            | 2013 | kg | 6.24  |  |  |
| SolomonIslands | Pigmeat              | 2013 | kg | 4.7   |  |  |
| SolomonIslands | PoultryMeat          | 2013 | kg | 3.34  |  |  |
| SolomonIslands | Whey                 | 2013 | kg | 0.06  |  |  |
| SouthAfrica    | AquaticAnimalsOthers | 2013 | kg | 0     |  |  |
| SouthAfrica    | AquaticPlants        | 2013 | kg | 0     |  |  |
| SouthAfrica    | BovineMeat           | 2013 | kg | 18.03 |  |  |
| SouthAfrica    | ButterGhee           | 2013 | kg | 0.35  |  |  |
| SouthAfrica    | Cephalopods          | 2013 | kg | 0.12  |  |  |
| SouthAfrica    | Cheese               | 2013 | kg | 1.67  |  |  |
| SouthAfrica    | Cream                | 2013 | kg | 0.05  |  |  |
| SouthAfrica    | DemersalFish         | 2013 | kg | 2.16  |  |  |
| SouthAfrica    | Eggs                 | 2013 | kg | 7.21  |  |  |
| SouthAfrica    | FreshwaterFish       | 2013 | kg | 0.19  |  |  |
| SouthAfrica    | Honey                | 2013 | kg | 0.06  |  |  |
| SouthAfrica    | MarineFishOther      | 2013 | kg | 0.07  |  |  |
| SouthAfrica    | MilkWhole            | 2013 | kg | 36.32 |  |  |
| SouthAfrica    | Pigmeat              | 2013 | kg | 4.16  |  |  |
| SouthAfrica    | PoultryMeat          | 2013 | kg | 37.57 |  |  |
| SouthAfrica    | Whey                 | 2013 | kg | 0     |  |  |
| Spain          | AquaticAnimalsOthers | 2013 | kg | 0.06  |  |  |
| Spain          | AquaticPlants        | 2013 | kg | 0     |  |  |
| Spain          | BovineMeat           | 2013 | kg | 12.15 |  |  |
| Spain          | ButterGhee           | 2013 | kg | 0.74  |  |  |
| Spain          | Cephalopods          | 2013 | kg | 3.2   |  |  |
| Spain          | Cheese               | 2013 | kg | 8.93  |  |  |
| Spain          | Cream                | 2013 | kg | 1.89  |  |  |
| Spain          | DemersalFish         | 2013 | kg | 13.65 |  |  |
| Spain          | Eggs                 | 2013 | kg | 13.32 |  |  |
| Spain          | FreshwaterFish       | 2013 | kg | 3.86  |  |  |
| Spain          | Honey                | 2013 | kg | 0.66  |  |  |
| Spain          | MarineFishOther      | 2013 | kg | 0.91  |  |  |
| Spain          | MilkWhole            | 2013 | kg | 84.31 |  |  |
| Spain          | Pigmeat              | 2013 | kg | 48.92 |  |  |
| Spain          | PoultryMeat          | 2013 | kg | 28.63 |  |  |
| SriLanka       | AquaticAnimalsOthers | 2013 | kg | 0.18  |  |  |
| SriLanka       | AquaticPlants        | 2013 | kg | 0     |  |  |
| SriLanka       | BovineMeat           | 2013 | kg | 1.38  |  |  |

|          |                      |      |    |        |  |
|----------|----------------------|------|----|--------|--|
| SriLanka | ButterGhee           | 2013 | kg | 0.06   |  |
| SriLanka | Cephalopods          | 2013 | kg | 0.02   |  |
| SriLanka | Cheese               | 2013 | kg | 0.06   |  |
| SriLanka | Cream                | 2013 | kg | 0.01   |  |
| SriLanka | DemersalFish         | 2013 | kg | 1.73   |  |
| SriLanka | Eggs                 | 2013 | kg | 4.57   |  |
| SriLanka | FreshwaterFish       | 2013 | kg | 3.2    |  |
| SriLanka | Honey                | 2013 | kg | 0      |  |
| SriLanka | MarineFishOther      | 2013 | kg | 1.06   |  |
| SriLanka | MilkWhole            | 2013 | kg | 30.36  |  |
| SriLanka | Pigmeat              | 2013 | kg | 0.05   |  |
| SriLanka | PoultryMeat          | 2013 | kg | 4.96   |  |
| SriLanka | Whey                 | 2013 | kg | 0      |  |
| Sudan    | BovineMeat           | 2013 | kg | 10.78  |  |
| Sudan    | ButterGhee           | 2013 | kg | 0.26   |  |
| Sudan    | Cheese               | 2013 | kg | 2.85   |  |
| Sudan    | Cream                | 2013 | kg | 0      |  |
| Sudan    | DemersalFish         | 2013 | kg | 0      |  |
| Sudan    | Eggs                 | 2013 | kg | 0.99   |  |
| Sudan    | FreshwaterFish       | 2013 | kg | 0.82   |  |
| Sudan    | Honey                | 2013 | kg | 0.02   |  |
| Sudan    | MarineFishOther      | 2013 | kg | 0.13   |  |
| Sudan    | MilkWhole            | 2013 | kg | 132.86 |  |
| Sudan    | PoultryMeat          | 2013 | kg | 1.25   |  |
| Sudan    | Whey                 | 2013 | kg | 0.07   |  |
| Suriname | AquaticPlants        | 2013 | kg | 0      |  |
| Suriname | BovineMeat           | 2013 | kg | 9.73   |  |
| Suriname | ButterGhee           | 2013 | kg | 0.35   |  |
| Suriname | Cephalopods          | 2013 | kg | 0      |  |
| Suriname | Cheese               | 2013 | kg | 1.45   |  |
| Suriname | Cream                | 2013 | kg | 0.03   |  |
| Suriname | DemersalFish         | 2013 | kg | 0.02   |  |
| Suriname | Eggs                 | 2013 | kg | 3.93   |  |
| Suriname | FreshwaterFish       | 2013 | kg | 0.9    |  |
| Suriname | Honey                | 2013 | kg | 0.05   |  |
| Suriname | MarineFishOther      | 2013 | kg | 6.9    |  |
| Suriname | MilkWhole            | 2013 | kg | 25.53  |  |
| Suriname | Pigmeat              | 2013 | kg | 10.23  |  |
| Suriname | PoultryMeat          | 2013 | kg | 35.55  |  |
| Eswatini | AquaticPlants        | 2013 | kg | 0      |  |
| Eswatini | BovineMeat           | 2013 | kg | 15.1   |  |
| Eswatini | ButterGhee           | 2013 | kg | 0.22   |  |
| Eswatini | Cephalopods          | 2013 | kg | 0      |  |
| Eswatini | Cheese               | 2013 | kg | 1.28   |  |
| Eswatini | Cream                | 2013 | kg | 0.34   |  |
| Eswatini | DemersalFish         | 2013 | kg | 0      |  |
| Eswatini | Eggs                 | 2013 | kg | 1.5    |  |
| Eswatini | FreshwaterFish       | 2013 | kg | 0.47   |  |
| Eswatini | Honey                | 2013 | kg | 0      |  |
| Eswatini | MarineFishOther      | 2013 | kg | 0.31   |  |
| Eswatini | MilkWhole            | 2013 | kg | 47.99  |  |
| Eswatini | Pigmeat              | 2013 | kg | 2.43   |  |
| Eswatini | PoultryMeat          | 2013 | kg | 6.18   |  |
| Eswatini | Whey                 | 2013 | kg | 6.05   |  |
| Sweden   | AquaticAnimalsOthers | 2013 | kg | 0      |  |
| Sweden   | AquaticPlants        | 2013 | kg | 0      |  |



|             |                      |      |    |        |      |  |
|-------------|----------------------|------|----|--------|------|--|
| Sweden      | BovineMeat           | 2013 | kg | 24.58  |      |  |
| Sweden      | ButterGhee           | 2013 | kg | 4.35   |      |  |
| Sweden      | Cephalopods          | 2013 | kg | 0.08   |      |  |
| Sweden      | Cheese               | 2013 | kg | 19.82  |      |  |
| Sweden      | Cream                | 2013 | kg | 11.55  |      |  |
| Sweden      | DemersalFish         | 2013 | kg | 9.52   |      |  |
| Sweden      | Eggs                 | 2013 | kg | 13.37  |      |  |
| Sweden      | FreshwaterFish       | 2013 | kg | 8.97   |      |  |
| Sweden      | Honey                | 2013 | kg | 0.84   |      |  |
| Sweden      | MarineFishOther      | 2013 | kg | 0.66   |      |  |
| Sweden      | MilkWhole            | 2013 | kg | 52.64  |      |  |
| Sweden      | Pigmeat              | 2013 | kg | 37     |      |  |
| Sweden      | PoultryMeat          | 2013 | kg | 16.64  |      |  |
| Sweden      | Whey                 | 2013 | kg | 0.1    |      |  |
| Switzerland | AquaticAnimalsOthers | 2013 | kg |        | 0.04 |  |
| Switzerland | AquaticPlants        | 2013 | kg | 0      |      |  |
| Switzerland | BovineMeat           | 2013 | kg | 21.26  |      |  |
| Switzerland | ButterGhee           | 2013 | kg | 5.6    |      |  |
| Switzerland | Cephalopods          | 2013 | kg | 0.41   |      |  |
| Switzerland | Cheese               | 2013 | kg | 19.79  |      |  |
| Switzerland | Cream                | 2013 | kg | 4.94   |      |  |
| Switzerland | DemersalFish         | 2013 | kg | 2.76   |      |  |
| Switzerland | Eggs                 | 2013 | kg | 10.53  |      |  |
| Switzerland | FreshwaterFish       | 2013 | kg | 6.16   |      |  |
| Switzerland | Honey                | 2013 | kg | 1.41   |      |  |
| Switzerland | MarineFishOther      | 2013 | kg | 1.76   |      |  |
| Switzerland | MilkWhole            | 2013 | kg | 108.26 |      |  |
| Switzerland | Pigmeat              | 2013 | kg | 31.49  |      |  |
| Switzerland | PoultryMeat          | 2013 | kg | 16.38  |      |  |
| Tajikistan  | AquaticPlants        | 2013 | kg | 0      |      |  |
| Tajikistan  | BovineMeat           | 2013 | kg | 4.35   |      |  |
| Tajikistan  | ButterGhee           | 2013 | kg | 0.03   |      |  |
| Tajikistan  | Cephalopods          | 2013 | kg | 0      |      |  |
| Tajikistan  | Cheese               | 2013 | kg | 2.66   |      |  |
| Tajikistan  | DemersalFish         | 2013 | kg | 0.01   |      |  |
| Tajikistan  | Eggs                 | 2013 | kg | 1.71   |      |  |
| Tajikistan  | FreshwaterFish       | 2013 | kg | 0.17   |      |  |
| Tajikistan  | Honey                | 2013 | kg | 0.43   |      |  |
| Tajikistan  | MarineFishOther      | 2013 | kg | 0.11   |      |  |
| Tajikistan  | MilkWhole            | 2013 | kg | 45.27  |      |  |
| Tajikistan  | Pigmeat              | 2013 | kg | 1.07   |      |  |
| Tajikistan  | PoultryMeat          | 2013 | kg | 2.6    |      |  |
| Thailand    | AquaticAnimalsOthers | 2013 | kg |        | 1.28 |  |
| Thailand    | AquaticPlants        | 2013 | kg | 0      |      |  |
| Thailand    | BovineMeat           | 2013 | kg | 2.56   |      |  |
| Thailand    | ButterGhee           | 2013 | kg | 0.17   |      |  |
| Thailand    | Cephalopods          | 2013 | kg | 2.12   |      |  |
| Thailand    | Cheese               | 2013 | kg | 0.2    |      |  |
| Thailand    | Cream                | 2013 | kg | 0.02   |      |  |
| Thailand    | DemersalFish         | 2013 | kg | 1      |      |  |
| Thailand    | Eggs                 | 2013 | kg | 12.35  |      |  |
| Thailand    | FreshwaterFish       | 2013 | kg | 8.32   |      |  |
| Thailand    | Honey                | 2013 | kg | 0.06   |      |  |
| Thailand    | MarineFishOther      | 2013 | kg | 0.21   |      |  |
| Thailand    | MilkWhole            | 2013 | kg | 17.01  |      |  |
| Thailand    | Pigmeat              | 2013 | kg | 13     |      |  |

|                   |                |        |      |       |       |  |
|-------------------|----------------|--------|------|-------|-------|--|
| Thailand          | PoultryMeat    | 2013   | kg   | 13.69 |       |  |
| Thailand          | Whey           | 2013   | kg   | 0.41  |       |  |
| NorthMacedonia    | AquaticAnimals | Others | 2013 | kg    | 0     |  |
| NorthMacedonia    | AquaticPlants  | 2013   | kg   | 0     |       |  |
| NorthMacedonia    | BovineMeat     | 2013   | kg   | 7.69  |       |  |
| NorthMacedonia    | ButterGhee     | 2013   | kg   | 3.1   |       |  |
| NorthMacedonia    | Cephalopods    | 2013   | kg   | 0.03  |       |  |
| NorthMacedonia    | Cheese         | 2013   | kg   | 4.64  |       |  |
| NorthMacedonia    | Cream          | 2013   | kg   | 0.06  |       |  |
| NorthMacedonia    | DemersalFish   | 2013   | kg   | 1.79  |       |  |
| NorthMacedonia    | Eggs           | 2013   | kg   | 6.38  |       |  |
| NorthMacedonia    | FreshwaterFish | 2013   | kg   | 1.11  |       |  |
| NorthMacedonia    | Honey          | 2013   | kg   | 0.42  |       |  |
| NorthMacedonia    | MarineFish     | Other  | 2013 | kg    | 0.28  |  |
| NorthMacedonia    | Milk           | Whole  | 2013 | kg    | 51.73 |  |
| NorthMacedonia    | Pigmeat        | 2013   | kg   | 10.35 |       |  |
| NorthMacedonia    | PoultryMeat    | 2013   | kg   | 18.77 |       |  |
| Timor-Leste       | AquaticAnimals | Others | 2013 | kg    | 0     |  |
| Timor-Leste       | AquaticPlants  | 2013   | kg   | 0     |       |  |
| Timor-Leste       | BovineMeat     | 2013   | kg   | 1.7   |       |  |
| Timor-Leste       | ButterGhee     | 2013   | kg   | 0.04  |       |  |
| Timor-Leste       | Cephalopods    | 2013   | kg   | 0.03  |       |  |
| Timor-Leste       | Cheese         | 2013   | kg   | 0.03  |       |  |
| Timor-Leste       | DemersalFish   | 2013   | kg   | 0.13  |       |  |
| Timor-Leste       | Eggs           | 2013   | kg   | 1.64  |       |  |
| Timor-Leste       | FreshwaterFish | 2013   | kg   | 0.07  |       |  |
| Timor-Leste       | Honey          | 2013   | kg   | 0.41  |       |  |
| Timor-Leste       | MarineFish     | Other  | 2013 | kg    | 3.28  |  |
| Timor-Leste       | Milk           | Whole  | 2013 | kg    | 0.96  |  |
| Timor-Leste       | Pigmeat        | 2013   | kg   | 11.78 |       |  |
| Timor-Leste       | PoultryMeat    | 2013   | kg   | 5.66  |       |  |
| Togo              | AquaticAnimals | Others | 2013 | kg    | 0     |  |
| Togo              | BovineMeat     | 2013   | kg   | 1.53  |       |  |
| Togo              | ButterGhee     | 2013   | kg   | 0.01  |       |  |
| Togo              | Cephalopods    | 2013   | kg   | 0     |       |  |
| Togo              | Cheese         | 2013   | kg   | 0.03  |       |  |
| Togo              | Cream          | 2013   | kg   | 0.02  |       |  |
| Togo              | DemersalFish   | 2013   | kg   | 0.46  |       |  |
| Togo              | Eggs           | 2013   | kg   | 0.86  |       |  |
| Togo              | FreshwaterFish | 2013   | kg   | 1.31  |       |  |
| Togo              | Honey          | 2013   | kg   | 0     |       |  |
| Togo              | MarineFish     | Other  | 2013 | kg    | 7.4   |  |
| Togo              | Milk           | Whole  | 2013 | kg    | 1.91  |  |
| Togo              | Pigmeat        | 2013   | kg   | 1.57  |       |  |
| Togo              | PoultryMeat    | 2013   | kg   | 6.63  |       |  |
| Togo              | Whey           | 2013   | kg   | 0.49  |       |  |
| TrinidadandTobago | AquaticPlants  | 2013   | kg   | 0     |       |  |
| TrinidadandTobago | BovineMeat     | 2013   | kg   | 6.13  |       |  |
| TrinidadandTobago | ButterGhee     | 2013   | kg   | 0.73  |       |  |
| TrinidadandTobago | Cephalopods    | 2013   | kg   | 0.54  |       |  |
| TrinidadandTobago | Cheese         | 2013   | kg   | 5.81  |       |  |
| TrinidadandTobago | Cream          | 2013   | kg   | 0.13  |       |  |
| TrinidadandTobago | DemersalFish   | 2013   | kg   | 2.02  |       |  |
| TrinidadandTobago | Eggs           | 2013   | kg   | 4.2   |       |  |
| TrinidadandTobago | FreshwaterFish | 2013   | kg   | 0.44  |       |  |
| TrinidadandTobago | Honey          | 2013   | kg   | 0.01  |       |  |

|                   |                      |      |    |        |  |
|-------------------|----------------------|------|----|--------|--|
| TrinidadandTobago | MarineFishOther      | 2013 | kg | 10.7   |  |
| TrinidadandTobago | MilkWhole            | 2013 | kg | 40.64  |  |
| TrinidadandTobago | Pigmeat              | 2013 | kg | 8.92   |  |
| TrinidadandTobago | PoultryMeat          | 2013 | kg | 58.27  |  |
| TrinidadandTobago | Whey                 | 2013 | kg | 7      |  |
| Tunisia           | AquaticAnimalsOthers | 2013 | kg | 0      |  |
| Tunisia           | AquaticPlants        | 2013 | kg | 0      |  |
| Tunisia           | BovineMeat           | 2013 | kg | 5.53   |  |
| Tunisia           | ButterGhee           | 2013 | kg | 0.64   |  |
| Tunisia           | Cephalopods          | 2013 | kg | 0.51   |  |
| Tunisia           | Cheese               | 2013 | kg | 0.88   |  |
| Tunisia           | Cream                | 2013 | kg | 0.95   |  |
| Tunisia           | DemersalFish         | 2013 | kg | 3.66   |  |
| Tunisia           | Eggs                 | 2013 | kg | 7.67   |  |
| Tunisia           | FreshwaterFish       | 2013 | kg | 0.2    |  |
| Tunisia           | Honey                | 2013 | kg | 0.3    |  |
| Tunisia           | MarineFishOther      | 2013 | kg | 0.56   |  |
| Tunisia           | MilkWhole            | 2013 | kg | 73.17  |  |
| Tunisia           | Pigmeat              | 2013 | kg | 0      |  |
| Tunisia           | PoultryMeat          | 2013 | kg | 18.5   |  |
| Tunisia           | Whey                 | 2013 | kg | 1.1    |  |
| Turkey            | AquaticAnimalsOthers | 2013 | kg | 0.01   |  |
| Turkey            | AquaticPlants        | 2013 | kg | 0      |  |
| Turkey            | BovineMeat           | 2013 | kg | 11.64  |  |
| Turkey            | ButterGhee           | 2013 | kg | 3.08   |  |
| Turkey            | Cephalopods          | 2013 | kg | 0.07   |  |
| Turkey            | Cheese               | 2013 | kg | 2.3    |  |
| Turkey            | Cream                | 2013 | kg | 0      |  |
| Turkey            | DemersalFish         | 2013 | kg | 1.04   |  |
| Turkey            | Eggs                 | 2013 | kg | 8.2    |  |
| Turkey            | FreshwaterFish       | 2013 | kg | 1.64   |  |
| Turkey            | Honey                | 2013 | kg | 1.22   |  |
| Turkey            | MarineFishOther      | 2013 | kg | 0      |  |
| Turkey            | MilkWhole            | 2013 | kg | 151.59 |  |
| Turkey            | Pigmeat              | 2013 | kg | 0.01   |  |
| Turkey            | PoultryMeat          | 2013 | kg | 18.78  |  |
| Turkmenistan      | AquaticAnimalsOthers | 2013 | kg | 0      |  |
| Turkmenistan      | AquaticPlants        | 2013 | kg | 0      |  |
| Turkmenistan      | BovineMeat           | 2013 | kg | 26.06  |  |
| Turkmenistan      | ButterGhee           | 2013 | kg | 0.69   |  |
| Turkmenistan      | Cephalopods          | 2013 | kg | 0      |  |
| Turkmenistan      | Cheese               | 2013 | kg | 0.57   |  |
| Turkmenistan      | DemersalFish         | 2013 | kg | 0.12   |  |
| Turkmenistan      | Eggs                 | 2013 | kg | 7.88   |  |
| Turkmenistan      | FreshwaterFish       | 2013 | kg | 2.89   |  |
| Turkmenistan      | Honey                | 2013 | kg | 0.15   |  |
| Turkmenistan      | MarineFishOther      | 2013 | kg | 0.05   |  |
| Turkmenistan      | MilkWhole            | 2013 | kg | 127.86 |  |
| Turkmenistan      | Pigmeat              | 2013 | kg | 1.45   |  |
| Turkmenistan      | PoultryMeat          | 2013 | kg | 3.81   |  |
| Uganda            | AquaticAnimalsOthers | 2013 | kg | 0      |  |
| Uganda            | AquaticPlants        | 2013 | kg | 0      |  |
| Uganda            | BovineMeat           | 2013 | kg | 5.15   |  |
| Uganda            | ButterGhee           | 2013 | kg | 0.01   |  |
| Uganda            | Cephalopods          | 2013 | kg | 0      |  |
| Uganda            | Cheese               | 2013 | kg | 0      |  |

|          |                      |      |    |        |  |
|----------|----------------------|------|----|--------|--|
| Uganda   | Cream                | 2013 | kg | 0      |  |
| Uganda   | DemersalFish         | 2013 | kg | 0      |  |
| Uganda   | Eggs                 | 2013 | kg | 0.97   |  |
| Uganda   | FreshwaterFish       | 2013 | kg | 12.46  |  |
| Uganda   | Honey                | 2013 | kg | 0.02   |  |
| Uganda   | MarineFishOther      | 2013 | kg | 0.01   |  |
| Uganda   | MilkWhole            | 2013 | kg | 37.05  |  |
| Uganda   | Pigmeat              | 2013 | kg | 3.37   |  |
| Uganda   | PoultryMeat          | 2013 | kg | 1.51   |  |
| Ukraine  | AquaticAnimalsOthers | 2013 | kg | 0.01   |  |
| Ukraine  | AquaticPlants        | 2013 | kg | 0      |  |
| Ukraine  | BovineMeat           | 2013 | kg | 8.96   |  |
| Ukraine  | ButterGhee           | 2013 | kg | 2.31   |  |
| Ukraine  | Cephalopods          | 2013 | kg | 0.01   |  |
| Ukraine  | Cheese               | 2013 | kg | 3.27   |  |
| Ukraine  | Cream                | 2013 | kg | 0.02   |  |
| Ukraine  | DemersalFish         | 2013 | kg | 1.94   |  |
| Ukraine  | Eggs                 | 2013 | kg | 18.01  |  |
| Ukraine  | FreshwaterFish       | 2013 | kg | 2.23   |  |
| Ukraine  | Honey                | 2013 | kg | 1.15   |  |
| Ukraine  | MarineFishOther      | 2013 | kg | 2.3    |  |
| Ukraine  | MilkWhole            | 2013 | kg | 119.46 |  |
| Ukraine  | Pigmeat              | 2013 | kg | 20.56  |  |
| Ukraine  | PoultryMeat          | 2013 | kg | 24.23  |  |
| Ukraine  | Whey                 | 2013 | kg | 0.34   |  |
| UAE      | AquaticAnimalsOthers | 2013 | kg | 0.01   |  |
| UAE      | AquaticPlants        | 2013 | kg | 0      |  |
| UAE      | BovineMeat           | 2013 | kg | 5.64   |  |
| UAE      | ButterGhee           | 2013 | kg | 1.62   |  |
| UAE      | Cephalopods          | 2013 | kg | 0.21   |  |
| UAE      | Cheese               | 2013 | kg | 3.58   |  |
| UAE      | Cream                | 2013 | kg | 0.61   |  |
| UAE      | DemersalFish         | 2013 | kg | 13.12  |  |
| UAE      | Eggs                 | 2013 | kg | 8.23   |  |
| UAE      | FreshwaterFish       | 2013 | kg | 0.79   |  |
| UAE      | Honey                | 2013 | kg | 0.25   |  |
| UAE      | MarineFishOther      | 2013 | kg | 1.55   |  |
| UAE      | MilkWhole            | 2013 | kg | 77.32  |  |
| UAE      | PoultryMeat          | 2013 | kg | 41.04  |  |
| UK       | AquaticAnimalsOthers | 2013 | kg | 0.01   |  |
| UK       | AquaticPlants        | 2013 | kg | 0      |  |
| UK       | BovineMeat           | 2013 | kg | 18.12  |  |
| UK       | ButterGhee           | 2013 | kg | 3.28   |  |
| UK       | Cephalopods          | 2013 | kg | 0.2    |  |
| UK       | Cheese               | 2013 | kg | 11.33  |  |
| UK       | Cream                | 2013 | kg | 0.27   |  |
| UK       | DemersalFish         | 2013 | kg | 8.92   |  |
| UK       | Eggs                 | 2013 | kg | 11.08  |  |
| UK       | FreshwaterFish       | 2013 | kg | 3.07   |  |
| UK       | Honey                | 2013 | kg | 0.66   |  |
| UK       | MarineFishOther      | 2013 | kg | 0.07   |  |
| UK       | MilkWhole            | 2013 | kg | 113.37 |  |
| UK       | Pigmeat              | 2013 | kg | 25.79  |  |
| UK       | PoultryMeat          | 2013 | kg | 31.55  |  |
| Tanzania | AquaticAnimalsOthers | 2013 | kg | 0      |  |
| Tanzania | AquaticPlants        | 2013 | kg | 0      |  |

|            |                      |      |    |        |  |
|------------|----------------------|------|----|--------|--|
| Tanzania   | BovineMeat           | 2013 | kg | 6.09   |  |
| Tanzania   | ButterGhee           | 2013 | kg | 0.64   |  |
| Tanzania   | Cephalopods          | 2013 | kg | 0.01   |  |
| Tanzania   | Cheese               | 2013 | kg | 0.27   |  |
| Tanzania   | Cream                | 2013 | kg | 0      |  |
| Tanzania   | DemersalFish         | 2013 | kg | 0.53   |  |
| Tanzania   | Eggs                 | 2013 | kg | 0.58   |  |
| Tanzania   | FreshwaterFish       | 2013 | kg | 4.71   |  |
| Tanzania   | Honey                | 2013 | kg | 0.61   |  |
| Tanzania   | MarineFishOther      | 2013 | kg | 0.08   |  |
| Tanzania   | MilkWhole            | 2013 | kg | 23.51  |  |
| Tanzania   | Pigmeat              | 2013 | kg | 0.32   |  |
| Tanzania   | PoultryMeat          | 2013 | kg | 1.84   |  |
| Tanzania   | Whey                 | 2013 | kg | 0.02   |  |
| USA        | AquaticAnimalsOthers | 2013 | kg | 0.04   |  |
| USA        | AquaticPlants        | 2013 | kg | 0      |  |
| USA        | BovineMeat           | 2013 | kg | 36.24  |  |
| USA        | ButterGhee           | 2013 | kg | 2.13   |  |
| USA        | Cephalopods          | 2013 | kg | 0.35   |  |
| USA        | Cheese               | 2013 | kg | 15.77  |  |
| USA        | Cream                | 2013 | kg | 0.06   |  |
| USA        | DemersalFish         | 2013 | kg | 4.22   |  |
| USA        | Eggs                 | 2013 | kg | 14.58  |  |
| USA        | FreshwaterFish       | 2013 | kg | 5.23   |  |
| USA        | Honey                | 2013 | kg | 0.67   |  |
| USA        | MarineFishOther      | 2013 | kg | 0.01   |  |
| USA        | MilkWhole            | 2013 | kg | 104.15 |  |
| USA        | Pigmeat              | 2013 | kg | 27.64  |  |
| USA        | PoultryMeat          | 2013 | kg | 50.01  |  |
| USA        | Whey                 | 2013 | kg | 0.41   |  |
| Uruguay    | AquaticAnimalsOthers | 2013 | kg | 0      |  |
| Uruguay    | AquaticPlants        | 2013 | kg | 0      |  |
| Uruguay    | BovineMeat           | 2013 | kg | 29.1   |  |
| Uruguay    | ButterGhee           | 2013 | kg | 1.33   |  |
| Uruguay    | Cephalopods          | 2013 | kg | 0.2    |  |
| Uruguay    | Cheese               | 2013 | kg | 10.53  |  |
| Uruguay    | Cream                | 2013 | kg | 0.15   |  |
| Uruguay    | DemersalFish         | 2013 | kg | 2.45   |  |
| Uruguay    | Eggs                 | 2013 | kg | 13.14  |  |
| Uruguay    | FreshwaterFish       | 2013 | kg | 1.46   |  |
| Uruguay    | Honey                | 2013 | kg | 1.07   |  |
| Uruguay    | MarineFishOther      | 2013 | kg | 0.18   |  |
| Uruguay    | MilkWhole            | 2013 | kg | 115.25 |  |
| Uruguay    | Pigmeat              | 2013 | kg | 16.84  |  |
| Uruguay    | PoultryMeat          | 2013 | kg | 27.45  |  |
| Uruguay    | Whey                 | 2013 | kg | 3.11   |  |
| Uzbekistan | AquaticAnimalsOthers | 2013 | kg | 0      |  |
| Uzbekistan | AquaticPlants        | 2013 | kg | 0      |  |
| Uzbekistan | BovineMeat           | 2013 | kg | 28.2   |  |
| Uzbekistan | ButterGhee           | 2013 | kg | 0.29   |  |
| Uzbekistan | Cephalopods          | 2013 | kg | 0      |  |
| Uzbekistan | Cheese               | 2013 | kg | 0.79   |  |
| Uzbekistan | Cream                | 2013 | kg | 0      |  |
| Uzbekistan | DemersalFish         | 2013 | kg | 0.02   |  |
| Uzbekistan | Eggs                 | 2013 | kg | 5.23   |  |
| Uzbekistan | FreshwaterFish       | 2013 | kg | 0.44   |  |

|            |                      |      |    |        |  |
|------------|----------------------|------|----|--------|--|
| Uzbekistan | Honey                | 2013 | kg | 0.25   |  |
| Uzbekistan | MarineFishOther      | 2013 | kg | 0.04   |  |
| Uzbekistan | MilkWhole            | 2013 | kg | 124.79 |  |
| Uzbekistan | Pigmeat              | 2013 | kg | 1.03   |  |
| Uzbekistan | PoultryMeat          | 2013 | kg | 1.87   |  |
| Vanuatu    | AquaticAnimalsOthers | 2013 | kg | 0      |  |
| Vanuatu    | AquaticPlants        | 2013 | kg | 0      |  |
| Vanuatu    | BovineMeat           | 2013 | kg | 11.22  |  |
| Vanuatu    | ButterGhee           | 2013 | kg | 0.03   |  |
| Vanuatu    | Cephalopods          | 2013 | kg | 0.14   |  |
| Vanuatu    | Cheese               | 2013 | kg | 0.18   |  |
| Vanuatu    | Cream                | 2013 | kg | 0.19   |  |
| Vanuatu    | DemersalFish         | 2013 | kg | 0.31   |  |
| Vanuatu    | Eggs                 | 2013 | kg | 3.36   |  |
| Vanuatu    | FreshwaterFish       | 2013 | kg | 0.37   |  |
| Vanuatu    | Honey                | 2013 | kg | 0.01   |  |
| Vanuatu    | MarineFishOther      | 2013 | kg | 13.43  |  |
| Vanuatu    | MilkWhole            | 2013 | kg | 22.84  |  |
| Vanuatu    | Pigmeat              | 2013 | kg | 15.14  |  |
| Vanuatu    | PoultryMeat          | 2013 | kg | 11.75  |  |
| Venezuela  | AquaticAnimalsOthers | 2013 | kg | 0      |  |
| Venezuela  | AquaticPlants        | 2013 | kg | 0      |  |
| Venezuela  | BovineMeat           | 2013 | kg | 25.89  |  |
| Venezuela  | ButterGhee           | 2013 | kg | 0.14   |  |
| Venezuela  | Cephalopods          | 2013 | kg | 0.24   |  |
| Venezuela  | Cheese               | 2013 | kg | 7.79   |  |
| Venezuela  | Cream                | 2013 | kg | 0.13   |  |
| Venezuela  | DemersalFish         | 2013 | kg | 2.15   |  |
| Venezuela  | Eggs                 | 2013 | kg | 5.63   |  |
| Venezuela  | FreshwaterFish       | 2013 | kg | 1.56   |  |
| Venezuela  | Honey                | 2013 | kg | 0.02   |  |
| Venezuela  | MarineFishOther      | 2013 | kg | 0.18   |  |
| Venezuela  | MilkWhole            | 2013 | kg | 48.26  |  |
| Venezuela  | Pigmeat              | 2013 | kg | 7.23   |  |
| Venezuela  | PoultryMeat          | 2013 | kg | 39.28  |  |
| Vietnam    | AquaticAnimalsOthers | 2013 | kg | 0.33   |  |
| Vietnam    | AquaticPlants        | 2013 | kg | 0      |  |
| Vietnam    | BovineMeat           | 2013 | kg | 7.44   |  |
| Vietnam    | ButterGhee           | 2013 | kg | 0.22   |  |
| Vietnam    | Cephalopods          | 2013 | kg | 1.52   |  |
| Vietnam    | Cheese               | 2013 | kg | 0.04   |  |
| Vietnam    | Cream                | 2013 | kg | 0.01   |  |
| Vietnam    | DemersalFish         | 2013 | kg | 0.07   |  |
| Vietnam    | Eggs                 | 2013 | kg | 3.84   |  |
| Vietnam    | FreshwaterFish       | 2013 | kg | 12.95  |  |
| Vietnam    | Honey                | 2013 | kg | 0      |  |
| Vietnam    | MarineFishOther      | 2013 | kg | 12.53  |  |
| Vietnam    | MilkWhole            | 2013 | kg | 8.37   |  |
| Vietnam    | Pigmeat              | 2013 | kg | 35     |  |
| Vietnam    | PoultryMeat          | 2013 | kg | 12.36  |  |
| Vietnam    | Whey                 | 2013 | kg | 5.93   |  |
| Yemen      | AquaticAnimalsOthers | 2013 | kg | 0      |  |
| Yemen      | AquaticPlants        | 2013 | kg | 0      |  |
| Yemen      | BovineMeat           | 2013 | kg | 4.75   |  |
| Yemen      | ButterGhee           | 2013 | kg | 0.13   |  |
| Yemen      | Cephalopods          | 2013 | kg | 0      |  |

```

Yemen Cheese 2013 kg 1.95
Yemen Cream 2013 kg 0.03
Yemen DemersalFish 2013 kg 1.1
Yemen Eggs 2013 kg 2.23
Yemen FreshwaterFish 2013 kg 0.04
Yemen Honey 2013 kg 0.1
Yemen MilkWhole 2013 kg 9.95
Yemen Pigmeat 2013 kg 0.01
Yemen PoultryMeat 2013 kg 10.72
Zambia AquaticPlants 2013 kg 0
Zambia BovineMeat 2013 kg 4.76
Zambia ButterGhee 2013 kg 0.02
Zambia Cephalopods 2013 kg 0
Zambia Cheese 2013 kg 0.12
Zambia Cream 2013 kg 0
Zambia DemersalFish 2013 kg 0
Zambia Eggs 2013 kg 3.32
Zambia FreshwaterFish 2013 kg 5.49
Zambia Honey 2013 kg 0.03
Zambia MarineFishOther 2013 kg 0.57
Zambia MilkWhole 2013 kg 6.99
Zambia Pigmeat 2013 kg 1.66
Zambia PoultryMeat 2013 kg 3.29
Zambia Whey 2013 kg 0.31
Zimbabwe AquaticPlants 2013 kg 0
Zimbabwe BovineMeat 2013 kg 7.37
Zimbabwe ButterGhee 2013 kg 0.17
Zimbabwe Cephalopods 2013 kg 0
Zimbabwe Cheese 2013 kg 0.21
Zimbabwe Cream 2013 kg 0.07
Zimbabwe DemersalFish 2013 kg 0.01
Zimbabwe Eggs 2013 kg 1.75
Zimbabwe FreshwaterFish 2013 kg 2.05
Zimbabwe Honey 2013 kg 0
Zimbabwe MarineFishOther 2013 kg 0.12
Zimbabwe MilkWhole 2013 kg 26.13
Zimbabwe Pigmeat 2013 kg 2.65
Zimbabwe PoultryMeat 2013 kg 4.97
Zimbabwe Whey 2013 kg 0.28

```

```

;
run ;

```

```

/***** CROP *****/

```

```

data crop;
input country
cards ;
Afghanistan BeveragesAlcoholic 0
Afghanistan Maizeandproducts 2.5
Afghanistan Potatoesandproducts 7.53
Afghanistan RiceMilledEquivalent 13.82
Afghanistan Wheatandproducts 160.23

```

| Afghanistan       | Wine                 | 0      |  |
|-------------------|----------------------|--------|--|
| Albania           | BeveragesAlcoholic   | 2.65   |  |
| Albania           | Maizeandproducts     | 1.79   |  |
| Albania           | Potatoesandproducts  | 41.26  |  |
| Albania           | RiceMilledEquivalent | 7.78   |  |
| Albania           | Wheatandproducts     | 138.64 |  |
| Albania           | Wine                 | 7.97   |  |
| Algeria           | BeveragesAlcoholic   | 0.18   |  |
| Algeria           | Maizeandproducts     | 15.99  |  |
| Algeria           | Potatoesandproducts  | 64.78  |  |
| Algeria           | RiceMilledEquivalent | 2.97   |  |
| Algeria           | Wheatandproducts     | 185.42 |  |
| Algeria           | Wine                 | 0.01   |  |
| Angola            | BeveragesAlcoholic   | 1.94   |  |
| Angola            | Maizeandproducts     | 38.8   |  |
| Angola            | Potatoesandproducts  | 20.39  |  |
| Angola            | RiceMilledEquivalent | 8.12   |  |
| Angola            | Wheatandproducts     | 40.72  |  |
| Angola            | Wine                 | 4.67   |  |
| AntiguaandBarbuda | BeveragesAlcoholic   | 5.33   |  |
| AntiguaandBarbuda | Maizeandproducts     | 2.44   |  |
| AntiguaandBarbuda | Potatoesandproducts  | 15.63  |  |
| AntiguaandBarbuda | RiceMilledEquivalent | 9.46   |  |
| AntiguaandBarbuda | Wheatandproducts     | 62.06  |  |
| AntiguaandBarbuda | Wine                 | 9.49   |  |
| Argentina         | BeveragesAlcoholic   | 1.81   |  |
| Argentina         | Maizeandproducts     | 10.44  |  |
| Argentina         | Potatoesandproducts  | 32.85  |  |
| Argentina         | RiceMilledEquivalent | 8.77   |  |
| Argentina         | Wheatandproducts     | 103.11 |  |
| Argentina         | Wine                 | 25.04  |  |
| Armenia           | BeveragesAlcoholic   | 0.17   |  |
| Armenia           | Maizeandproducts     | 0.03   |  |
| Armenia           | Potatoesandproducts  | 45.1   |  |
| Armenia           | RiceMilledEquivalent | 3.18   |  |
| Armenia           | Wheatandproducts     | 130.6  |  |
| Armenia           | Wine                 | 1.48   |  |
| Australia         | BeveragesAlcoholic   | 1.16   |  |
| Australia         | Maizeandproducts     | 4.94   |  |
| Australia         | Potatoesandproducts  | 54.58  |  |
| Australia         | RiceMilledEquivalent | 11.03  |  |
| Australia         | Wheatandproducts     | 70.46  |  |
| Australia         | Wine                 | 19.48  |  |
| Austria           | BeveragesAlcoholic   | 4.91   |  |
| Austria           | Maizeandproducts     | 12.33  |  |
| Austria           | Potatoesandproducts  | 58.34  |  |
| Austria           | RiceMilledEquivalent | 3.7    |  |
| Austria           | Wheatandproducts     | 81.1   |  |
| Austria           | Wine                 | 31.71  |  |
| Azerbaijan        | BeveragesAlcoholic   | 9.77   |  |
| Azerbaijan        | Maizeandproducts     | 13.33  |  |
| Azerbaijan        | Potatoesandproducts  | 73.85  |  |
| Azerbaijan        | RiceMilledEquivalent | 2.04   |  |
| Azerbaijan        | Wheatandproducts     | 222.4  |  |
| Azerbaijan        | Wine                 | 0.23   |  |
| Bahamas           | BeveragesAlcoholic   | 11.4   |  |



|            |                      |        |
|------------|----------------------|--------|
| Bahamas    | Maizeandproducts     | 3.59   |
| Bahamas    | Potatoesandproducts  | 8.3    |
| Bahamas    | RiceMilledEquivalent | 23.97  |
| Bahamas    | Wheatandproducts     | 39.98  |
| Bahamas    | Wine                 | 4.53   |
| Bangladesh | BeveragesAlcoholic   | 0.01   |
| Bangladesh | Maizeandproducts     | 0.8    |
| Bangladesh | Potatoesandproducts  | 46.4   |
| Bangladesh | RiceMilledEquivalent | 171.73 |
| Bangladesh | Wheatandproducts     | 17.47  |
| Bangladesh | Wine                 | 0      |
| Barbados   | BeveragesAlcoholic   | 2.34   |
| Barbados   | Maizeandproducts     | 11.9   |
| Barbados   | Potatoesandproducts  | 49.24  |
| Barbados   | RiceMilledEquivalent | 15.66  |
| Barbados   | Wheatandproducts     | 65.71  |
| Barbados   | Wine                 | 8.45   |
| Belarus    | BeveragesAlcoholic   | 15.35  |
| Belarus    | Maizeandproducts     | 0.57   |
| Belarus    | Potatoesandproducts  | 183.16 |
| Belarus    | RiceMilledEquivalent | 3.17   |
| Belarus    | Wheatandproducts     | 60.48  |
| Belarus    | Wine                 | 8.74   |
| Belgium    | BeveragesAlcoholic   | 1.71   |
| Belgium    | Maizeandproducts     | 2.22   |
| Belgium    | Potatoesandproducts  | 93.41  |
| Belgium    | RiceMilledEquivalent | 8.61   |
| Belgium    | Wheatandproducts     | 111.91 |
| Belgium    | Wine                 | 27.49  |
| Belize     | BeveragesAlcoholic   | 6.03   |
| Belize     | Maizeandproducts     | 31.75  |
| Belize     | Potatoesandproducts  | 14.24  |
| Belize     | RiceMilledEquivalent | 28.42  |
| Belize     | Wheatandproducts     | 54.06  |
| Belize     | Wine                 | 2.21   |
| Benin      | BeveragesAlcoholic   | 0.29   |
| Benin      | Maizeandproducts     | 42.7   |
| Benin      | Potatoesandproducts  | 0.1    |
| Benin      | RiceMilledEquivalent | 53.44  |
| Benin      | Wheatandproducts     | 13.06  |
| Benin      | Wine                 | 0.42   |
| Bermuda    | BeveragesAlcoholic   | 3.94   |
| Bermuda    | Maizeandproducts     | 2.9    |
| Bermuda    | Potatoesandproducts  | 16.03  |
| Bermuda    | RiceMilledEquivalent | 5.38   |
| Bermuda    | Wheatandproducts     | 54.88  |
| Bermuda    | Wine                 | 13.49  |
| Bolivia    | BeveragesAlcoholic   | 0.67   |
| Bolivia    | Maizeandproducts     | 38.86  |
| Bolivia    | Potatoesandproducts  | 64.66  |
| Bolivia    | RiceMilledEquivalent | 26.99  |
| Bolivia    | Wheatandproducts     | 49.99  |
| Bolivia    | Wine                 | 0.87   |
| BosniaH    | BeveragesAlcoholic   | 18.77  |
| BosniaH    | Maizeandproducts     | 77.32  |
| BosniaH    | Potatoesandproducts  | 76.12  |

|             |                      |        |
|-------------|----------------------|--------|
| BosniaH     | RiceMilledEquivalent | 1.88   |
| BosniaH     | Wheatandproducts     | 93.56  |
| BosniaH     | Wine                 | 1.88   |
| Botswana    | BeveragesAlcoholic   | 0.71   |
| Botswana    | Maizeandproducts     | 38.45  |
| Botswana    | Potatoesandproducts  | 12.88  |
| Botswana    | RiceMilledEquivalent | 7.06   |
| Botswana    | Wheatandproducts     | 38.2   |
| Botswana    | Wine                 | 2.52   |
| Brazil      | BeveragesAlcoholic   | 3.59   |
| Brazil      | Maizeandproducts     | 28.01  |
| Brazil      | Potatoesandproducts  | 17.9   |
| Brazil      | RiceMilledEquivalent | 32.13  |
| Brazil      | Wheatandproducts     | 53     |
| Brazil      | Wine                 | 1.59   |
| Brunei      | BeveragesAlcoholic   | 0.02   |
| Brunei      | Maizeandproducts     | 12.77  |
| Brunei      | Potatoesandproducts  | 12.14  |
| Brunei      | RiceMilledEquivalent | 76.67  |
| Brunei      | Wheatandproducts     | 42.94  |
| Brunei      | Wine                 | 0.06   |
| Bulgaria    | BeveragesAlcoholic   | 8.31   |
| Bulgaria    | Maizeandproducts     | 26.82  |
| Bulgaria    | Potatoesandproducts  | 27.5   |
| Bulgaria    | RiceMilledEquivalent | 2.24   |
| Bulgaria    | Wheatandproducts     | 121.17 |
| Bulgaria    | Wine                 | 11.58  |
| BurkinaFaso | BeveragesAlcoholic   | 0.33   |
| BurkinaFaso | Maizeandproducts     | 68.51  |
| BurkinaFaso | Potatoesandproducts  | 0.27   |
| BurkinaFaso | RiceMilledEquivalent | 21.43  |
| BurkinaFaso | Wheatandproducts     | 11.1   |
| BurkinaFaso | Wine                 | 0.19   |
| CaboVerde   | BeveragesAlcoholic   | 0.84   |
| CaboVerde   | Maizeandproducts     | 38.83  |
| CaboVerde   | Potatoesandproducts  | 31.34  |
| CaboVerde   | RiceMilledEquivalent | 48.75  |
| CaboVerde   | Wheatandproducts     | 38.64  |
| CaboVerde   | Wine                 | 7.14   |
| Cambodia    | BeveragesAlcoholic   | 1.65   |
| Cambodia    | Maizeandproducts     | 12.48  |
| Cambodia    | Potatoesandproducts  | 0.05   |
| Cambodia    | RiceMilledEquivalent | 159.1  |
| Cambodia    | Wheatandproducts     | 2.74   |
| Cambodia    | Wine                 | 0.1    |
| Cameroon    | BeveragesAlcoholic   | 0.01   |
| Cameroon    | Maizeandproducts     | 42.01  |
| Cameroon    | Potatoesandproducts  | 6.4    |
| Cameroon    | RiceMilledEquivalent | 23.85  |
| Cameroon    | Wheatandproducts     | 22.6   |
| Cameroon    | Wine                 | 0.47   |
| Canada      | BeveragesAlcoholic   | 0.06   |
| Canada      | Maizeandproducts     | 18.95  |
| Canada      | Potatoesandproducts  | 71.07  |
| Canada      | RiceMilledEquivalent | 12.65  |
| Canada      | Wheatandproducts     | 84.96  |

|                        |                      |        |      |
|------------------------|----------------------|--------|------|
| Canada                 | Wine                 | 11.45  |      |
| CentralAfricanRepublic | BeveragesAlcoholic   |        | 0.02 |
| CentralAfricanRepublic | Maizeandproducts     |        | 27.4 |
| CentralAfricanRepublic | Potatoesandproducts  |        | 0.13 |
| CentralAfricanRepublic | RiceMilledEquivalent |        | 7.39 |
| CentralAfricanRepublic | Wheatandproducts     |        | 5.62 |
| CentralAfricanRepublic | Wine                 | 0.04   |      |
| Chad                   | BeveragesAlcoholic   | 0.05   |      |
| Chad                   | Maizeandproducts     | 16.47  |      |
| Chad                   | Potatoesandproducts  | 3.26   |      |
| Chad                   | RiceMilledEquivalent | 10.81  |      |
| Chad                   | Wheatandproducts     | 9.27   |      |
| Chad                   | Wine                 | 0.17   |      |
| Chile                  | BeveragesAlcoholic   | 2.49   |      |
| Chile                  | Maizeandproducts     | 21.04  |      |
| Chile                  | Potatoesandproducts  | 61.82  |      |
| Chile                  | RiceMilledEquivalent | 8.85   |      |
| Chile                  | Wheatandproducts     | 104.74 |      |
| Chile                  | Wine                 | 17.04  |      |
| HongKong               | BeveragesAlcoholic   | 1.94   |      |
| HongKong               | Maizeandproducts     | 4.47   |      |
| HongKong               | Potatoesandproducts  | 24.71  |      |
| HongKong               | RiceMilledEquivalent | 43.48  |      |
| HongKong               | Wheatandproducts     | 53.14  |      |
| HongKong               | Wine                 | 4.24   |      |
| ChinaMacaoSAR          | BeveragesAlcoholic   | 5.12   |      |
| ChinaMacaoSAR          | Maizeandproducts     | 0.42   |      |
| ChinaMacaoSAR          | Potatoesandproducts  | 14.25  |      |
| ChinaMacaoSAR          | RiceMilledEquivalent | 36.5   |      |
| ChinaMacaoSAR          | Wheatandproducts     | 56.41  |      |
| ChinaMacaoSAR          | Wine                 | 11.6   |      |
| China                  | BeveragesAlcoholic   | 5.04   |      |
| China                  | Maizeandproducts     | 6.78   |      |
| China                  | Potatoesandproducts  | 41.42  |      |
| China                  | RiceMilledEquivalent | 78.18  |      |
| China                  | Wheatandproducts     | 63.36  |      |
| China                  | Wine                 | 1.5    |      |
| ChinaTaiwanProvinceof  | BeveragesAlcoholic   | 4.74   |      |
| ChinaTaiwanProvinceof  | Maizeandproducts     | 8.36   |      |
| ChinaTaiwanProvinceof  | Potatoesandproducts  | 6.94   |      |
| ChinaTaiwanProvinceof  | RiceMilledEquivalent | 45.85  |      |
| ChinaTaiwanProvinceof  | Wheatandproducts     | 50.92  |      |
| ChinaTaiwanProvinceof  | Wine                 | 0.71   |      |
| Colombia               | BeveragesAlcoholic   | 2.27   |      |
| Colombia               | Maizeandproducts     | 30.15  |      |
| Colombia               | Potatoesandproducts  | 33.45  |      |
| Colombia               | RiceMilledEquivalent | 28.02  |      |
| Colombia               | Wheatandproducts     | 29.79  |      |
| Colombia               | Wine                 | 0.35   |      |
| Congo                  | BeveragesAlcoholic   | 0.76   |      |
| Congo                  | Maizeandproducts     | 3.65   |      |
| Congo                  | Potatoesandproducts  | 2.07   |      |
| Congo                  | RiceMilledEquivalent | 16.51  |      |
| Congo                  | Wheatandproducts     | 40.07  |      |
| Congo                  | Wine                 | 1.03   |      |
| CostaRica              | BeveragesAlcoholic   | 8.07   |      |

|           |                      |        |
|-----------|----------------------|--------|
| CostaRica | Maizeandproducts     | 10.77  |
| CostaRica | Potatoesandproducts  | 15.41  |
| CostaRica | RiceMilledEquivalent | 45.69  |
| CostaRica | Wheatandproducts     | 39.31  |
| CostaRica | Wine                 | 2.02   |
| IvoryCoa  | BeveragesAlcoholic   | 0.01   |
| IvoryCoa  | Maizeandproducts     | 21.99  |
| IvoryCoa  | Potatoesandproducts  | 0.38   |
| IvoryCoa  | RiceMilledEquivalent | 63.56  |
| IvoryCoa  | Wheatandproducts     | 20.75  |
| IvoryCoa  | Wine                 | 1.34   |
| Croatia   | BeveragesAlcoholic   | 3.34   |
| Croatia   | Maizeandproducts     | 9.86   |
| Croatia   | Potatoesandproducts  | 42.33  |
| Croatia   | RiceMilledEquivalent | 2.64   |
| Croatia   | Wheatandproducts     | 106.59 |
| Croatia   | Wine                 | 13.8   |
| Cuba      | BeveragesAlcoholic   | 7.97   |
| Cuba      | Maizeandproducts     | 28.2   |
| Cuba      | Potatoesandproducts  | 9.47   |
| Cuba      | RiceMilledEquivalent | 67.7   |
| Cuba      | Wheatandproducts     | 54.62  |
| Cuba      | Wine                 | 1.55   |
| Cyprus    | BeveragesAlcoholic   | 2.45   |
| Cyprus    | Maizeandproducts     | 3.3    |
| Cyprus    | Potatoesandproducts  | 29.93  |
| Cyprus    | RiceMilledEquivalent | 4.94   |
| Cyprus    | Wheatandproducts     | 83.25  |
| Cyprus    | Wine                 | 15.7   |
| Czechia   | BeveragesAlcoholic   | 5.76   |
| Czechia   | Maizeandproducts     | 0      |
| Czechia   | Potatoesandproducts  | 75.49  |
| Czechia   | RiceMilledEquivalent | 4.79   |
| Czechia   | Wheatandproducts     | 92.67  |
| Czechia   | Wine                 | 9.17   |
| NKorea    | BeveragesAlcoholic   | 6.39   |
| NKorea    | Maizeandproducts     | 45.81  |
| NKorea    | Potatoesandproducts  | 49.02  |
| NKorea    | RiceMilledEquivalent | 74.18  |
| NKorea    | Wheatandproducts     | 21.37  |
| Denmark   | BeveragesAlcoholic   | 3.37   |
| Denmark   | Maizeandproducts     | 4.71   |
| Denmark   | Potatoesandproducts  | 62.56  |
| Denmark   | RiceMilledEquivalent | 4.96   |
| Denmark   | Wheatandproducts     | 98     |
| Denmark   | Wine                 | 28.26  |
| Djibouti  | BeveragesAlcoholic   | 1.3    |
| Djibouti  | Maizeandproducts     | 1.21   |
| Djibouti  | Potatoesandproducts  | 16.66  |
| Djibouti  | RiceMilledEquivalent | 43.46  |
| Djibouti  | Wheatandproducts     | 119    |
| Djibouti  | Wine                 | 0.96   |
| Dominica  | BeveragesAlcoholic   | 9.38   |
| Dominica  | Maizeandproducts     | 5.8    |
| Dominica  | Potatoesandproducts  | 13.28  |
| Dominica  | RiceMilledEquivalent | 8.4    |

|                 |                      |        |  |
|-----------------|----------------------|--------|--|
| Dominica        | Wheatandproducts     | 71.28  |  |
| Dominica        | Wine                 | 2.32   |  |
| Dominr          | BeveragesAlcoholic   | 4.01   |  |
| Dominr          | Maizeandproducts     | 3.67   |  |
| Dominr          | Potatoesandproducts  | 6.09   |  |
| Dominr          | RiceMilledEquivalent | 52.49  |  |
| Dominr          | Wheatandproducts     | 30.27  |  |
| Dominr          | Wine                 | 1.2    |  |
| Ecuador         | BeveragesAlcoholic   | 0.64   |  |
| Ecuador         | Maizeandproducts     | 8.3    |  |
| Ecuador         | Potatoesandproducts  | 19.33  |  |
| Ecuador         | RiceMilledEquivalent | 45.07  |  |
| Ecuador         | Wheatandproducts     | 39.19  |  |
| Ecuador         | Wine                 | 0.32   |  |
| Egypt           | BeveragesAlcoholic   | 0.05   |  |
| Egypt           | Maizeandproducts     | 62.42  |  |
| Egypt           | Potatoesandproducts  | 36.46  |  |
| Egypt           | RiceMilledEquivalent | 39.77  |  |
| Egypt           | Wheatandproducts     | 146.83 |  |
| Egypt           | Wine                 | 0.05   |  |
| ElSalvador      | BeveragesAlcoholic   | 3.09   |  |
| ElSalvador      | Maizeandproducts     | 70.09  |  |
| ElSalvador      | Potatoesandproducts  | 14.28  |  |
| ElSalvador      | RiceMilledEquivalent | 10.53  |  |
| ElSalvador      | Wheatandproducts     | 28.19  |  |
| ElSalvador      | Wine                 | 0.34   |  |
| Estonia         | BeveragesAlcoholic   | 26.9   |  |
| Estonia         | Maizeandproducts     | 5.37   |  |
| Estonia         | Potatoesandproducts  | 88.45  |  |
| Estonia         | RiceMilledEquivalent | 2.56   |  |
| Estonia         | Wheatandproducts     | 89.36  |  |
| Estonia         | Wine                 | 15.59  |  |
| Ethiopia        | BeveragesAlcoholic   | 0.17   |  |
| Ethiopia        | Maizeandproducts     | 42.08  |  |
| Ethiopia        | Potatoesandproducts  | 6.65   |  |
| Ethiopia        | RiceMilledEquivalent | 2.25   |  |
| Ethiopia        | Wheatandproducts     | 31.26  |  |
| Ethiopia        | Wine                 | 0.02   |  |
| Fiji            | BeveragesAlcoholic   | 1.08   |  |
| Fiji            | Maizeandproducts     | 0.33   |  |
| Fiji            | Potatoesandproducts  | 28.36  |  |
| Fiji            | RiceMilledEquivalent | 45.62  |  |
| Fiji            | Wheatandproducts     | 84.22  |  |
| Fiji            | Wine                 | 1.14   |  |
| Finland         | BeveragesAlcoholic   | 4.06   |  |
| Finland         | Potatoesandproducts  | 65.65  |  |
| Finland         | RiceMilledEquivalent | 4.42   |  |
| Finland         | Wheatandproducts     | 81.99  |  |
| Finland         | Wine                 | 11.79  |  |
| France          | BeveragesAlcoholic   | 2.26   |  |
| France          | Maizeandproducts     | 11.11  |  |
| France          | Potatoesandproducts  | 53.79  |  |
| France          | RiceMilledEquivalent | 4.88   |  |
| France          | Wheatandproducts     | 108.43 |  |
| France          | Wine                 | 37.78  |  |
| FrenchPolynesia | BeveragesAlcoholic   | 1.08   |  |

|                 |                      |        |
|-----------------|----------------------|--------|
| FrenchPolynesia | Maizeandproducts     | 0      |
| FrenchPolynesia | Potatoesandproducts  | 34.42  |
| FrenchPolynesia | RiceMilledEquivalent | 35.59  |
| FrenchPolynesia | Wheatandproducts     | 68.67  |
| FrenchPolynesia | Wine                 | 9.48   |
| Gabon           | BeveragesAlcoholic   | 2.81   |
| Gabon           | Maizeandproducts     | 16     |
| Gabon           | Potatoesandproducts  | 3.87   |
| Gabon           | RiceMilledEquivalent | 37.07  |
| Gabon           | Wheatandproducts     | 62.87  |
| Gabon           | Wine                 | 4.33   |
| Gambia          | BeveragesAlcoholic   | 0.01   |
| Gambia          | Maizeandproducts     | 14.18  |
| Gambia          | Potatoesandproducts  | 1.62   |
| Gambia          | RiceMilledEquivalent | 61.84  |
| Gambia          | Wheatandproducts     | 37.91  |
| Gambia          | Wine                 | 0.12   |
| Georgia         | BeveragesAlcoholic   | 2.77   |
| Georgia         | Maizeandproducts     | 27.18  |
| Georgia         | Potatoesandproducts  | 56.1   |
| Georgia         | RiceMilledEquivalent | 2.64   |
| Georgia         | Wheatandproducts     | 163.43 |
| Georgia         | Wine                 | 14.73  |
| Germany         | BeveragesAlcoholic   | 10.61  |
| Germany         | Maizeandproducts     | 12.13  |
| Germany         | Potatoesandproducts  | 61.46  |
| Germany         | RiceMilledEquivalent | 3.34   |
| Germany         | Wheatandproducts     | 83.41  |
| Germany         | Wine                 | 22.91  |
| Ghana           | BeveragesAlcoholic   | 0.18   |
| Ghana           | Maizeandproducts     | 25.48  |
| Ghana           | Potatoesandproducts  | 0.24   |
| Ghana           | RiceMilledEquivalent | 32.03  |
| Ghana           | Wheatandproducts     | 14.45  |
| Ghana           | Wine                 | 0.39   |
| Greece          | BeveragesAlcoholic   | 2.27   |
| Greece          | Maizeandproducts     | 1.92   |
| Greece          | Potatoesandproducts  | 72.4   |
| Greece          | RiceMilledEquivalent | 6.64   |
| Greece          | Wheatandproducts     | 124.04 |
| Greece          | Wine                 | 18.69  |
| Grenada         | BeveragesAlcoholic   | 8.53   |
| Grenada         | Maizeandproducts     | 4.96   |
| Grenada         | Potatoesandproducts  | 10.27  |
| Grenada         | RiceMilledEquivalent | 9.56   |
| Grenada         | Wheatandproducts     | 59.59  |
| Grenada         | Wine                 | 3.16   |
| Guatemala       | BeveragesAlcoholic   | 1.72   |
| Guatemala       | Maizeandproducts     | 87.25  |
| Guatemala       | Potatoesandproducts  | 10.79  |
| Guatemala       | RiceMilledEquivalent | 5.66   |
| Guatemala       | Wheatandproducts     | 35.9   |
| Guatemala       | Wine                 | 0.23   |
| Guinea          | BeveragesAlcoholic   | 0.03   |
| Guinea          | Maizeandproducts     | 8.87   |
| Guinea          | Potatoesandproducts  | 7.04   |

|               |                      |        |
|---------------|----------------------|--------|
| Guinea        | RiceMilledEquivalent | 97.12  |
| Guinea        | Wheatandproducts     | 18.55  |
| Guinea        | Wine                 | 0.12   |
| Guinea-Bissau | BeveragesAlcoholic   | 0.73   |
| Guinea-Bissau | Maizeandproducts     | 3.88   |
| Guinea-Bissau | Potatoesandproducts  | 1.7    |
| Guinea-Bissau | RiceMilledEquivalent | 98.09  |
| Guinea-Bissau | Wheatandproducts     | 11.33  |
| Guinea-Bissau | Wine                 | 3.81   |
| Guyana        | BeveragesAlcoholic   | 3.48   |
| Guyana        | Maizeandproducts     | 2.05   |
| Guyana        | Potatoesandproducts  | 12.25  |
| Guyana        | RiceMilledEquivalent | 76.58  |
| Guyana        | Wheatandproducts     | 59.66  |
| Guyana        | Wine                 | 0.1    |
| Haiti         | BeveragesAlcoholic   | 8.75   |
| Haiti         | Maizeandproducts     | 23.14  |
| Haiti         | Potatoesandproducts  | 3.69   |
| Haiti         | RiceMilledEquivalent | 42.75  |
| Haiti         | Wheatandproducts     | 16.11  |
| Haiti         | Wine                 | 0.08   |
| Honduras      | BeveragesAlcoholic   | 3.25   |
| Honduras      | Maizeandproducts     | 77.96  |
| Honduras      | Potatoesandproducts  | 5.46   |
| Honduras      | RiceMilledEquivalent | 14.42  |
| Honduras      | Wheatandproducts     | 37.36  |
| Honduras      | Wine                 | 0.24   |
| Hungary       | BeveragesAlcoholic   | 6.33   |
| Hungary       | Maizeandproducts     | 0.25   |
| Hungary       | Potatoesandproducts  | 46.43  |
| Hungary       | RiceMilledEquivalent | 2.15   |
| Hungary       | Wheatandproducts     | 109.98 |
| Hungary       | Wine                 | 23.97  |
| Iceland       | BeveragesAlcoholic   | 1.36   |
| Iceland       | Potatoesandproducts  | 32.08  |
| Iceland       | RiceMilledEquivalent | 3.89   |
| Iceland       | Wheatandproducts     | 72.92  |
| Iceland       | Wine                 | 10.96  |
| India         | BeveragesAlcoholic   | 1.62   |
| India         | Maizeandproducts     | 6.29   |
| India         | Potatoesandproducts  | 24.4   |
| India         | RiceMilledEquivalent | 69.49  |
| India         | Wheatandproducts     | 60.56  |
| India         | Wine                 | 0      |
| Indonesia     | BeveragesAlcoholic   | 0.11   |
| Indonesia     | Maizeandproducts     | 35.3   |
| Indonesia     | Potatoesandproducts  | 4.22   |
| Indonesia     | RiceMilledEquivalent | 134.62 |
| Indonesia     | Wheatandproducts     | 25.45  |
| Indonesia     | Wine                 | 0      |
| Iran          | BeveragesAlcoholic   | 0      |
| Iran          | Maizeandproducts     | 2.37   |
| Iran          | Potatoesandproducts  | 50.64  |
| Iran          | RiceMilledEquivalent | 29.95  |
| Iran          | Wheatandproducts     | 153.31 |
| Iran          | Wine                 | 0      |

|            |                      |        |
|------------|----------------------|--------|
| Iraq       | BeveragesAlcoholic   | 0.4    |
| Iraq       | Maizeandproducts     | 0.3    |
| Iraq       | Potatoesandproducts  | 17.85  |
| Iraq       | RiceMilledEquivalent | 40.54  |
| Iraq       | Wheatandproducts     | 136.47 |
| Iraq       | Wine                 | 0.02   |
| Ireland    | BeveragesAlcoholic   | 8.64   |
| Ireland    | Maizeandproducts     | 9.19   |
| Ireland    | Potatoesandproducts  | 94.01  |
| Ireland    | RiceMilledEquivalent | 3      |
| Ireland    | Wheatandproducts     | 107.98 |
| Ireland    | Wine                 | 16.5   |
| Israel     | BeveragesAlcoholic   | 1.75   |
| Israel     | Maizeandproducts     | 14.75  |
| Israel     | Potatoesandproducts  | 39.9   |
| Israel     | RiceMilledEquivalent | 16.81  |
| Israel     | Wheatandproducts     | 110.86 |
| Israel     | Wine                 | 0.86   |
| Italy      | BeveragesAlcoholic   | 0.82   |
| Italy      | Maizeandproducts     | 4.23   |
| Italy      | Potatoesandproducts  | 38.16  |
| Italy      | RiceMilledEquivalent | 5.74   |
| Italy      | Wheatandproducts     | 146.37 |
| Italy      | Wine                 | 30.55  |
| Jamaica    | BeveragesAlcoholic   | 3.09   |
| Jamaica    | Maizeandproducts     | 7.06   |
| Jamaica    | Potatoesandproducts  | 11.36  |
| Jamaica    | RiceMilledEquivalent | 23.45  |
| Jamaica    | Wheatandproducts     | 70.67  |
| Jamaica    | Wine                 | 0.86   |
| Japan      | BeveragesAlcoholic   | 8.99   |
| Japan      | Maizeandproducts     | 9.21   |
| Japan      | Potatoesandproducts  | 20.95  |
| Japan      | RiceMilledEquivalent | 59.85  |
| Japan      | Wheatandproducts     | 45.04  |
| Japan      | Wine                 | 2.72   |
| Jordan     | BeveragesAlcoholic   | 0.13   |
| Jordan     | Maizeandproducts     | 2.68   |
| Jordan     | Potatoesandproducts  | 20.79  |
| Jordan     | RiceMilledEquivalent | 19.67  |
| Jordan     | Wheatandproducts     | 136.74 |
| Jordan     | Wine                 | 0.05   |
| Kazakhstan | BeveragesAlcoholic   | 6.37   |
| Kazakhstan | Maizeandproducts     | 0.82   |
| Kazakhstan | Potatoesandproducts  | 111.34 |
| Kazakhstan | RiceMilledEquivalent | 7.32   |
| Kazakhstan | Wheatandproducts     | 92.31  |
| Kazakhstan | Wine                 | 2.67   |
| Kenya      | BeveragesAlcoholic   | 0.57   |
| Kenya      | Maizeandproducts     | 76.2   |
| Kenya      | Potatoesandproducts  | 41.66  |
| Kenya      | RiceMilledEquivalent | 12.94  |
| Kenya      | Wheatandproducts     | 34.65  |
| Kenya      | Wine                 | 0.13   |
| Kiribati   | BeveragesAlcoholic   | 0      |
| Kiribati   | Maizeandproducts     | 0.31   |



|                               |                      |        |  |
|-------------------------------|----------------------|--------|--|
| Kiribati                      | Potatoesandproducts  | 0.44   |  |
| Kiribati                      | RiceMilledEquivalent | 65.75  |  |
| Kiribati                      | Wheatandproducts     | 48.64  |  |
| Kiribati                      | Wine                 | 0.08   |  |
| Kuwait                        | BeveragesAlcoholic   | 0      |  |
| Kuwait                        | Maizeandproducts     | 5.99   |  |
| Kuwait                        | Potatoesandproducts  | 65.07  |  |
| Kuwait                        | RiceMilledEquivalent | 43.83  |  |
| Kuwait                        | Wheatandproducts     | 96.76  |  |
| Kyrgyzstan                    | BeveragesAlcoholic   | 3.87   |  |
| Kyrgyzstan                    | Maizeandproducts     | 26.16  |  |
| Kyrgyzstan                    | Potatoesandproducts  | 99.27  |  |
| Kyrgyzstan                    | RiceMilledEquivalent | 7.31   |  |
| Kyrgyzstan                    | Wheatandproducts     | 129.09 |  |
| Kyrgyzstan                    | Wine                 | 0.61   |  |
| LaoPeople'sDemocraticRepublic | BeveragesAlcoholic   | 5.27   |  |
| LaoPeople'sDemocraticRepublic | Maizeandproducts     | 15.44  |  |
| LaoPeople'sDemocraticRepublic | Potatoesandproducts  | 3.39   |  |
| LaoPeople'sDemocraticRepublic | RiceMilledEquivalent | 159.11 |  |
| LaoPeople'sDemocraticRepublic | Wheatandproducts     | 1.89   |  |
| LaoPeople'sDemocraticRepublic | Wine                 | 0.33   |  |
| Latvia                        | BeveragesAlcoholic   | 8.97   |  |
| Latvia                        | Maizeandproducts     | 0.24   |  |
| Latvia                        | Potatoesandproducts  | 116.52 |  |
| Latvia                        | RiceMilledEquivalent | 2.21   |  |
| Latvia                        | Wheatandproducts     | 72.13  |  |
| Latvia                        | Wine                 | 3.25   |  |
| Lebanon                       | BeveragesAlcoholic   | 2.79   |  |
| Lebanon                       | Maizeandproducts     | 0.41   |  |
| Lebanon                       | Potatoesandproducts  | 44.03  |  |
| Lebanon                       | RiceMilledEquivalent | 10.84  |  |
| Lebanon                       | Wheatandproducts     | 119.72 |  |
| Lebanon                       | Wine                 | 2.7    |  |
| Lesotho                       | BeveragesAlcoholic   | 0.44   |  |
| Lesotho                       | Maizeandproducts     | 158.4  |  |
| Lesotho                       | Potatoesandproducts  | 56.52  |  |
| Lesotho                       | RiceMilledEquivalent | 3.73   |  |
| Lesotho                       | Wheatandproducts     | 52.7   |  |
| Lesotho                       | Wine                 | 0.42   |  |
| Liberia                       | BeveragesAlcoholic   | 3.46   |  |
| Liberia                       | Maizeandproducts     | 0.04   |  |
| Liberia                       | Potatoesandproducts  | 0.27   |  |
| Liberia                       | RiceMilledEquivalent | 94.75  |  |
| Liberia                       | Wheatandproducts     | 10.95  |  |
| Liberia                       | Wine                 | 0.08   |  |
| Lithuania                     | BeveragesAlcoholic   | 15.21  |  |
| Lithuania                     | Maizeandproducts     | 0.66   |  |
| Lithuania                     | Potatoesandproducts  | 95.75  |  |
| Lithuania                     | RiceMilledEquivalent | 3.07   |  |
| Lithuania                     | Wheatandproducts     | 121.59 |  |
| Lithuania                     | Wine                 | 13.21  |  |
| Luxembourg                    | BeveragesAlcoholic   | 11     |  |
| Luxembourg                    | Maizeandproducts     | 4.64   |  |
| Luxembourg                    | Potatoesandproducts  | 55.75  |  |
| Luxembourg                    | RiceMilledEquivalent | 4.2    |  |
| Luxembourg                    | Wheatandproducts     | 103.2  |  |

|            |                      |        |
|------------|----------------------|--------|
| Luxembourg | Wine                 | 51.41  |
| Madagascar | BeveragesAlcoholic   | 0.49   |
| Madagascar | Maizeandproducts     | 17.98  |
| Madagascar | Potatoesandproducts  | 5.64   |
| Madagascar | RiceMilledEquivalent | 102.53 |
| Madagascar | Wheatandproducts     | 9.01   |
| Madagascar | Wine                 | 0.39   |
| Malawi     | BeveragesAlcoholic   | 0.32   |
| Malawi     | Maizeandproducts     | 129.24 |
| Malawi     | Potatoesandproducts  | 131.69 |
| Malawi     | RiceMilledEquivalent | 4.75   |
| Malawi     | Wheatandproducts     | 11.77  |
| Malawi     | Wine                 | 0.01   |
| Malaysia   | BeveragesAlcoholic   | 0      |
| Malaysia   | Maizeandproducts     | 15.82  |
| Malaysia   | Potatoesandproducts  | 10.97  |
| Malaysia   | RiceMilledEquivalent | 81.25  |
| Malaysia   | Wheatandproducts     | 51.04  |
| Malaysia   | Wine                 | 0.13   |
| Maldives   | BeveragesAlcoholic   | 1.04   |
| Maldives   | Maizeandproducts     | 0.83   |
| Maldives   | Potatoesandproducts  | 15.55  |
| Maldives   | RiceMilledEquivalent | 50.73  |
| Maldives   | Wheatandproducts     | 77.77  |
| Maldives   | Wine                 | 1.83   |
| Mali       | BeveragesAlcoholic   | 0.03   |
| Mali       | Maizeandproducts     | 38.05  |
| Mali       | Potatoesandproducts  | 6.51   |
| Mali       | RiceMilledEquivalent | 56.99  |
| Mali       | Wheatandproducts     | 12.48  |
| Mali       | Wine                 | 0.03   |
| Malta      | BeveragesAlcoholic   | 4.72   |
| Malta      | Maizeandproducts     | 5.38   |
| Malta      | Potatoesandproducts  | 48.61  |
| Malta      | RiceMilledEquivalent | 4.96   |
| Malta      | Wheatandproducts     | 139.58 |
| Malta      | Wine                 | 15.37  |
| Mauritania | BeveragesAlcoholic   | 0.02   |
| Mauritania | Maizeandproducts     | 3.2    |
| Mauritania | Potatoesandproducts  | 6.89   |
| Mauritania | RiceMilledEquivalent | 48.43  |
| Mauritania | Wheatandproducts     | 100.77 |
| Mauritania | Wine                 | 0      |
| Mauritius  | BeveragesAlcoholic   | 1.57   |
| Mauritius  | Maizeandproducts     | 2.97   |
| Mauritius  | Potatoesandproducts  | 19.29  |
| Mauritius  | RiceMilledEquivalent | 45.56  |
| Mauritius  | Wheatandproducts     | 114.02 |
| Mauritius  | Wine                 | 1.54   |
| Mexico     | BeveragesAlcoholic   | 0.63   |
| Mexico     | Maizeandproducts     | 116.34 |
| Mexico     | Potatoesandproducts  | 14.86  |
| Mexico     | RiceMilledEquivalent | 5.64   |
| Mexico     | Wheatandproducts     | 35.21  |
| Mexico     | Wine                 | 0.09   |
| Mongolia   | BeveragesAlcoholic   | 4.58   |

|              |                      |        |
|--------------|----------------------|--------|
| Mongolia     | Maizeandproducts     | 0.02   |
| Mongolia     | Potatoesandproducts  | 48.73  |
| Mongolia     | RiceMilledEquivalent | 7.68   |
| Mongolia     | Wheatandproducts     | 124.64 |
| Mongolia     | Wine                 | 0.77   |
| Montenegro   | BeveragesAlcoholic   | 3.28   |
| Montenegro   | Maizeandproducts     | 4.39   |
| Montenegro   | Potatoesandproducts  | 119.31 |
| Montenegro   | RiceMilledEquivalent | 2.24   |
| Montenegro   | Wheatandproducts     | 121.89 |
| Montenegro   | Wine                 | 20.77  |
| Morocco      | BeveragesAlcoholic   | 0.19   |
| Morocco      | Maizeandproducts     | 36.11  |
| Morocco      | Potatoesandproducts  | 48.56  |
| Morocco      | RiceMilledEquivalent | 1.1    |
| Morocco      | Wheatandproducts     | 179.7  |
| Morocco      | Wine                 | 0.98   |
| Mozambique   | BeveragesAlcoholic   | 0.34   |
| Mozambique   | Maizeandproducts     | 54.56  |
| Mozambique   | Potatoesandproducts  | 8.04   |
| Mozambique   | RiceMilledEquivalent | 23.41  |
| Mozambique   | Wheatandproducts     | 14.65  |
| Mozambique   | Wine                 | 0.38   |
| Myanmar      | BeveragesAlcoholic   | 0.48   |
| Myanmar      | Maizeandproducts     | 3.87   |
| Myanmar      | Potatoesandproducts  | 9.98   |
| Myanmar      | RiceMilledEquivalent | 132.8  |
| Myanmar      | Wheatandproducts     | 6.22   |
| Myanmar      | Wine                 | 0.07   |
| Namibia      | BeveragesAlcoholic   | 1.77   |
| Namibia      | Maizeandproducts     | 43.41  |
| Namibia      | Potatoesandproducts  | 16.11  |
| Namibia      | RiceMilledEquivalent | 6.31   |
| Namibia      | Wheatandproducts     | 36.26  |
| Namibia      | Wine                 | 4.46   |
| Nepal        | BeveragesAlcoholic   | 0.19   |
| Nepal        | Maizeandproducts     | 43.41  |
| Nepal        | Potatoesandproducts  | 80.56  |
| Nepal        | RiceMilledEquivalent | 87.75  |
| Nepal        | Wheatandproducts     | 50.46  |
| Nepal        | Wine                 | 0.03   |
| Netherlands  | BeveragesAlcoholic   | 2.71   |
| Netherlands  | Maizeandproducts     | 2.47   |
| Netherlands  | Potatoesandproducts  | 90.83  |
| Netherlands  | RiceMilledEquivalent | 2.93   |
| Netherlands  | Wheatandproducts     | 70.17  |
| Netherlands  | Wine                 | 20.57  |
| NewCaledonia | BeveragesAlcoholic   | 3.78   |
| NewCaledonia | Maizeandproducts     | 0.7    |
| NewCaledonia | Potatoesandproducts  | 31.3   |
| NewCaledonia | RiceMilledEquivalent | 17.47  |
| NewCaledonia | Wheatandproducts     | 81.75  |
| NewCaledonia | Wine                 | 20.15  |
| NewZealand   | BeveragesAlcoholic   | 3.69   |
| NewZealand   | Maizeandproducts     | 4.43   |
| NewZealand   | Potatoesandproducts  | 53.93  |

|             |                      |        |
|-------------|----------------------|--------|
| NewZealand  | RiceMilledEquivalent | 9.16   |
| NewZealand  | Wheatandproducts     | 76.91  |
| NewZealand  | Wine                 | 7.58   |
| Nicaragua   | BeveragesAlcoholic   | 2.72   |
| Nicaragua   | Maizeandproducts     | 68.53  |
| Nicaragua   | Potatoesandproducts  | 6.24   |
| Nicaragua   | RiceMilledEquivalent | 43.33  |
| Nicaragua   | Wheatandproducts     | 28.17  |
| Nicaragua   | Wine                 | 0.2    |
| Niger       | BeveragesAlcoholic   | 0.07   |
| Niger       | Maizeandproducts     | 3.76   |
| Niger       | Potatoesandproducts  | 4.43   |
| Niger       | RiceMilledEquivalent | 13.17  |
| Niger       | Wheatandproducts     | 4.79   |
| Niger       | Wine                 | 0.04   |
| Nigeria     | BeveragesAlcoholic   | 0.08   |
| Nigeria     | Maizeandproducts     | 32.72  |
| Nigeria     | Potatoesandproducts  | 4.63   |
| Nigeria     | RiceMilledEquivalent | 28.23  |
| Nigeria     | Wheatandproducts     | 20.82  |
| Nigeria     | Wine                 | 0.16   |
| Norway      | BeveragesAlcoholic   | 2.48   |
| Norway      | Maizeandproducts     | 0      |
| Norway      | Potatoesandproducts  | 52.87  |
| Norway      | RiceMilledEquivalent | 4.36   |
| Norway      | Wheatandproducts     | 97.12  |
| Norway      | Wine                 | 16.24  |
| Oman        | Maizeandproducts     | 12.55  |
| Oman        | Potatoesandproducts  | 26.78  |
| Oman        | RiceMilledEquivalent | 56.55  |
| Oman        | Wheatandproducts     | 64.1   |
| Pakistan    | BeveragesAlcoholic   | 0      |
| Pakistan    | Maizeandproducts     | 14.54  |
| Pakistan    | Potatoesandproducts  | 15.33  |
| Pakistan    | RiceMilledEquivalent | 12.25  |
| Pakistan    | Wheatandproducts     | 113.63 |
| Pakistan    | Wine                 | 0      |
| Panama      | BeveragesAlcoholic   | 3.21   |
| Panama      | Maizeandproducts     | 25.56  |
| Panama      | Potatoesandproducts  | 13.98  |
| Panama      | RiceMilledEquivalent | 66.42  |
| Panama      | Wheatandproducts     | 38.96  |
| Panama      | Wine                 | 1.23   |
| Paraguay    | BeveragesAlcoholic   | 3.28   |
| Paraguay    | Maizeandproducts     | 59.32  |
| Paraguay    | Potatoesandproducts  | 2.9    |
| Paraguay    | RiceMilledEquivalent | 4.91   |
| Paraguay    | Wheatandproducts     | 31.51  |
| Paraguay    | Wine                 | 2.98   |
| Peru        | BeveragesAlcoholic   | 2.92   |
| Peru        | Maizeandproducts     | 19.41  |
| Peru        | Potatoesandproducts  | 82.5   |
| Peru        | RiceMilledEquivalent | 48.92  |
| Peru        | Wheatandproducts     | 56.12  |
| Peru        | Wine                 | 2.61   |
| Philippines | BeveragesAlcoholic   | 4.24   |

|                    |                      |        |  |
|--------------------|----------------------|--------|--|
| Philippines        | Maizeandproducts     | 20.11  |  |
| Philippines        | Potatoesandproducts  | 2.24   |  |
| Philippines        | RiceMilledEquivalent | 119.44 |  |
| Philippines        | Wheatandproducts     | 23.12  |  |
| Philippines        | Wine                 | 0.11   |  |
| Poland             | BeveragesAlcoholic   | 4.45   |  |
| Poland             | Potatoesandproducts  | 104    |  |
| Poland             | RiceMilledEquivalent | 0.95   |  |
| Poland             | Wheatandproducts     | 108.83 |  |
| Poland             | Wine                 | 2.8    |  |
| Portugal           | BeveragesAlcoholic   | 9.33   |  |
| Portugal           | Maizeandproducts     | 17.59  |  |
| Portugal           | Potatoesandproducts  | 69.58  |  |
| Portugal           | RiceMilledEquivalent | 14.86  |  |
| Portugal           | Wheatandproducts     | 94.3   |  |
| Portugal           | Wine                 | 40.35  |  |
| S.Korea            | BeveragesAlcoholic   | 5.13   |  |
| S.Korea            | Maizeandproducts     | 12.46  |  |
| S.Korea            | Potatoesandproducts  | 14.84  |  |
| S.Korea            | RiceMilledEquivalent | 85.18  |  |
| S.Korea            | Wheatandproducts     | 50.84  |  |
| S.Korea            | Wine                 | 0.67   |  |
| Moldova            | BeveragesAlcoholic   | 5.03   |  |
| Moldova            | Maizeandproducts     | 91.77  |  |
| Moldova            | Potatoesandproducts  | 53.99  |  |
| Moldova            | RiceMilledEquivalent | 2.95   |  |
| Moldova            | Wheatandproducts     | 47.89  |  |
| Moldova            | Wine                 | 10.34  |  |
| Romania            | BeveragesAlcoholic   | 1.38   |  |
| Romania            | Maizeandproducts     | 40.47  |  |
| Romania            | Potatoesandproducts  | 99.51  |  |
| Romania            | RiceMilledEquivalent | 2.59   |  |
| Romania            | Wheatandproducts     | 134.87 |  |
| Romania            | Wine                 | 20.78  |  |
| Russia             | BeveragesAlcoholic   | 7.73   |  |
| Russia             | Maizeandproducts     | 0.41   |  |
| Russia             | Potatoesandproducts  | 113.26 |  |
| Russia             | RiceMilledEquivalent | 4.71   |  |
| Russia             | Wheatandproducts     | 130.99 |  |
| Russia             | Wine                 | 9.15   |  |
| Rwanda             | BeveragesAlcoholic   | 0.26   |  |
| Rwanda             | Maizeandproducts     | 14.34  |  |
| Rwanda             | Potatoesandproducts  | 99.61  |  |
| Rwanda             | RiceMilledEquivalent | 8.7    |  |
| Rwanda             | Wheatandproducts     | 11.34  |  |
| Rwanda             | Wine                 | 0.06   |  |
| SaintKittsandNevis | BeveragesAlcoholic   | 2.96   |  |
| SaintKittsandNevis | Maizeandproducts     | 0.54   |  |
| SaintKittsandNevis | Potatoesandproducts  | 18.43  |  |
| SaintKittsandNevis | RiceMilledEquivalent | 19.87  |  |
| SaintKittsandNevis | Wheatandproducts     | 60.68  |  |
| SaintKittsandNevis | Wine                 | 4.3    |  |
| SaintLucia         | BeveragesAlcoholic   | 6.98   |  |
| SaintLucia         | Maizeandproducts     | 2.92   |  |
| SaintLucia         | Potatoesandproducts  | 12.56  |  |
| SaintLucia         | RiceMilledEquivalent | 10.38  |  |

|                              |                      |        |       |
|------------------------------|----------------------|--------|-------|
| SaintLucia                   | Wheatandproducts     | 91.02  |       |
| SaintLucia                   | Wine                 | 6.34   |       |
| SaintVincentandtheGrenadines | BeveragesAlcoholic   |        | 9.47  |
| SaintVincentandtheGrenadines | Maizeandproducts     |        | 9.3   |
| SaintVincentandtheGrenadines | Potatoesandproducts  |        | 9.28  |
| SaintVincentandtheGrenadines | RiceMilledEquivalent |        | 33.65 |
| SaintVincentandtheGrenadines | Wheatandproducts     |        | 73.91 |
| SaintVincentandtheGrenadines | Wine                 | 1.81   |       |
| Samoa                        | BeveragesAlcoholic   | 0.16   |       |
| Samoa                        | Maizeandproducts     | 0.4    |       |
| Samoa                        | Potatoesandproducts  | 8.02   |       |
| Samoa                        | RiceMilledEquivalent | 6.02   |       |
| Samoa                        | Wheatandproducts     | 61.41  |       |
| Samoa                        | Wine                 | 0.62   |       |
| SaoTomeandPrincipe           | BeveragesAlcoholic   |        | 0.8   |
| SaoTomeandPrincipe           | Maizeandproducts     |        | 7.09  |
| SaoTomeandPrincipe           | Potatoesandproducts  |        | 1.99  |
| SaoTomeandPrincipe           | RiceMilledEquivalent |        | 35.05 |
| SaoTomeandPrincipe           | Wheatandproducts     |        | 55.37 |
| SaoTomeandPrincipe           | Wine                 | 22.32  |       |
| SaudiArabia                  | Maizeandproducts     | 20.77  |       |
| SaudiArabia                  | Potatoesandproducts  | 23.24  |       |
| SaudiArabia                  | RiceMilledEquivalent | 36.02  |       |
| SaudiArabia                  | Wheatandproducts     | 89.47  |       |
| SaudiArabia                  | Wine                 | 0      |       |
| Senegal                      | BeveragesAlcoholic   | 0.01   |       |
| Senegal                      | Maizeandproducts     | 25.81  |       |
| Senegal                      | Potatoesandproducts  | 5.5    |       |
| Senegal                      | RiceMilledEquivalent | 72.29  |       |
| Senegal                      | Wheatandproducts     | 37.32  |       |
| Senegal                      | Wine                 | 0.39   |       |
| Serbia                       | BeveragesAlcoholic   | 6.91   |       |
| Serbia                       | Maizeandproducts     | 23.05  |       |
| Serbia                       | Potatoesandproducts  | 40.25  |       |
| Serbia                       | RiceMilledEquivalent | 1.22   |       |
| Serbia                       | Wheatandproducts     | 105.88 |       |
| Serbia                       | Wine                 | 25.47  |       |
| SierraLeone                  | BeveragesAlcoholic   | 0.07   |       |
| SierraLeone                  | Maizeandproducts     | 4.56   |       |
| SierraLeone                  | Potatoesandproducts  | 0.32   |       |
| SierraLeone                  | RiceMilledEquivalent | 103.3  |       |
| SierraLeone                  | Wheatandproducts     | 8.72   |       |
| SierraLeone                  | Wine                 | 0.05   |       |
| Slovakia                     | BeveragesAlcoholic   | 5.42   |       |
| Slovakia                     | Maizeandproducts     | 0      |       |
| Slovakia                     | Potatoesandproducts  | 52.19  |       |
| Slovakia                     | RiceMilledEquivalent | 2.88   |       |
| Slovakia                     | Wheatandproducts     | 123.62 |       |
| Slovakia                     | Wine                 | 3.88   |       |
| Slovenia                     | BeveragesAlcoholic   | 1.66   |       |
| Slovenia                     | Maizeandproducts     | 32.72  |       |
| Slovenia                     | Potatoesandproducts  | 53.07  |       |
| Slovenia                     | RiceMilledEquivalent | 3.95   |       |
| Slovenia                     | Wheatandproducts     | 103.43 |       |
| Slovenia                     | Wine                 | 9.56   |       |
| SolomonIslands               | BeveragesAlcoholic   |        | 0.03  |

|                |                      |        |
|----------------|----------------------|--------|
| SolomonIslands | Maizeandproducts     | 0.15   |
| SolomonIslands | Potatoesandproducts  | 0.17   |
| SolomonIslands | RiceMilledEquivalent | 63.76  |
| SolomonIslands | Wheatandproducts     | 25.37  |
| SolomonIslands | Wine                 | 0.07   |
| SouthAfrica    | BeveragesAlcoholic   | 6.38   |
| SouthAfrica    | Maizeandproducts     | 100.1  |
| SouthAfrica    | Potatoesandproducts  | 30.66  |
| SouthAfrica    | RiceMilledEquivalent | 17.41  |
| SouthAfrica    | Wheatandproducts     | 60.13  |
| SouthAfrica    | Wine                 | 7.71   |
| Spain          | BeveragesAlcoholic   | 2.13   |
| Spain          | Maizeandproducts     | 1.99   |
| Spain          | Potatoesandproducts  | 60.04  |
| Spain          | RiceMilledEquivalent | 8.32   |
| Spain          | Wheatandproducts     | 93.88  |
| Spain          | Wine                 | 20.98  |
| SriLanka       | BeveragesAlcoholic   | 0.2    |
| SriLanka       | Maizeandproducts     | 5.08   |
| SriLanka       | Potatoesandproducts  | 8.36   |
| SriLanka       | RiceMilledEquivalent | 109.72 |
| SriLanka       | Wheatandproducts     | 37.01  |
| SriLanka       | Wine                 | 0.07   |
| Sudan          | BeveragesAlcoholic   | 0.53   |
| Sudan          | Maizeandproducts     | 0.4    |
| Sudan          | Potatoesandproducts  | 9.26   |
| Sudan          | RiceMilledEquivalent | 1.27   |
| Sudan          | Wheatandproducts     | 22.52  |
| Suriname       | BeveragesAlcoholic   | 4.61   |
| Suriname       | Maizeandproducts     | 1.93   |
| Suriname       | Potatoesandproducts  | 19.19  |
| Suriname       | RiceMilledEquivalent | 68.68  |
| Suriname       | Wheatandproducts     | 52.81  |
| Suriname       | Wine                 | 1.29   |
| Eswatini       | BeveragesAlcoholic   | 0.15   |
| Eswatini       | Maizeandproducts     | 69.83  |
| Eswatini       | Potatoesandproducts  | 12.43  |
| Eswatini       | RiceMilledEquivalent | 21.15  |
| Eswatini       | Wheatandproducts     | 37.15  |
| Eswatini       | Wine                 | 2.64   |
| Sweden         | BeveragesAlcoholic   | 3.28   |
| Sweden         | Maizeandproducts     | 1.05   |
| Sweden         | Potatoesandproducts  | 59.81  |
| Sweden         | RiceMilledEquivalent | 5.96   |
| Sweden         | Wheatandproducts     | 79.59  |
| Sweden         | Wine                 | 20.75  |
| Switzerland    | BeveragesAlcoholic   | 2.94   |
| Switzerland    | Maizeandproducts     | 0.73   |
| Switzerland    | Potatoesandproducts  | 40.73  |
| Switzerland    | RiceMilledEquivalent | 2.43   |
| Switzerland    | Wheatandproducts     | 89.51  |
| Switzerland    | Wine                 | 36.36  |
| Tajikistan     | BeveragesAlcoholic   | 0.53   |
| Tajikistan     | Maizeandproducts     | 7.8    |
| Tajikistan     | Potatoesandproducts  | 35.91  |
| Tajikistan     | RiceMilledEquivalent | 6.99   |

|                   |                      |        |
|-------------------|----------------------|--------|
| Tajikistan        | Wheatandproducts     | 130.59 |
| Tajikistan        | Wine                 | 0.05   |
| Thailand          | BeveragesAlcoholic   | 10.23  |
| Thailand          | Maizeandproducts     | 10.16  |
| Thailand          | Potatoesandproducts  | 4.87   |
| Thailand          | RiceMilledEquivalent | 114.57 |
| Thailand          | Wheatandproducts     | 10.93  |
| Thailand          | Wine                 | 0.12   |
| NorthMacedonia    | BeveragesAlcoholic   | 1.34   |
| NorthMacedonia    | Maizeandproducts     | 22.72  |
| NorthMacedonia    | Potatoesandproducts  | 59.27  |
| NorthMacedonia    | RiceMilledEquivalent | 2.81   |
| NorthMacedonia    | Wheatandproducts     | 104.8  |
| NorthMacedonia    | Wine                 | 2.14   |
| Timor-Leste       | BeveragesAlcoholic   | 0.09   |
| Timor-Leste       | Maizeandproducts     | 83.55  |
| Timor-Leste       | Potatoesandproducts  | 1.85   |
| Timor-Leste       | RiceMilledEquivalent | 64.2   |
| Timor-Leste       | Wheatandproducts     | 13.93  |
| Timor-Leste       | Wine                 | 0.48   |
| Togo              | BeveragesAlcoholic   | 0.47   |
| Togo              | Maizeandproducts     | 69.58  |
| Togo              | Potatoesandproducts  | 0.51   |
| Togo              | RiceMilledEquivalent | 25.99  |
| Togo              | Wheatandproducts     | 12.91  |
| Togo              | Wine                 | 0.93   |
| TrinidadandTobago | BeveragesAlcoholic   | 3.86   |
| TrinidadandTobago | Maizeandproducts     | 9.07   |
| TrinidadandTobago | Potatoesandproducts  | 32.29  |
| TrinidadandTobago | RiceMilledEquivalent | 16.38  |
| TrinidadandTobago | Wheatandproducts     | 90.17  |
| TrinidadandTobago | Wine                 | 1.65   |
| Tunisia           | BeveragesAlcoholic   | 0.09   |
| Tunisia           | Potatoesandproducts  | 30.97  |
| Tunisia           | RiceMilledEquivalent | 1.07   |
| Tunisia           | Wheatandproducts     | 197.5  |
| Tunisia           | Wine                 | 2.68   |
| Turkey            | BeveragesAlcoholic   | 1.47   |
| Turkey            | Maizeandproducts     | 24.3   |
| Turkey            | Potatoesandproducts  | 40.04  |
| Turkey            | RiceMilledEquivalent | 10.74  |
| Turkey            | Wheatandproducts     | 169.96 |
| Turkey            | Wine                 | 0.39   |
| Turkmenistan      | BeveragesAlcoholic   | 0.02   |
| Turkmenistan      | Maizeandproducts     | 0.01   |
| Turkmenistan      | Potatoesandproducts  | 30.53  |
| Turkmenistan      | RiceMilledEquivalent | 10.93  |
| Turkmenistan      | Wheatandproducts     | 188.86 |
| Turkmenistan      | Wine                 | 7.47   |
| Uganda            | BeveragesAlcoholic   | 0.29   |
| Uganda            | Maizeandproducts     | 48.95  |
| Uganda            | Potatoesandproducts  | 3.94   |
| Uganda            | RiceMilledEquivalent | 4.64   |
| Uganda            | Wheatandproducts     | 10.14  |
| Uganda            | Wine                 | 0.05   |
| Ukraine           | BeveragesAlcoholic   | 9.77   |



|                               |                      |        |  |
|-------------------------------|----------------------|--------|--|
| Ukraine                       | Maizeandproducts     | 10.61  |  |
| Ukraine                       | Potatoesandproducts  | 135.94 |  |
| Ukraine                       | RiceMilledEquivalent | 3      |  |
| Ukraine                       | Wheatandproducts     | 105.15 |  |
| Ukraine                       | Wine                 | 3.94   |  |
| UAE                           | Maizeandproducts     | 1.14   |  |
| UAE                           | Potatoesandproducts  | 12.93  |  |
| UAE                           | RiceMilledEquivalent | 56.25  |  |
| UAE                           | Wheatandproducts     | 101.29 |  |
| UK                            | BeveragesAlcoholic   | 2.6    |  |
| UK                            | Maizeandproducts     | 2.9    |  |
| UK                            | Potatoesandproducts  | 103.86 |  |
| UK                            | RiceMilledEquivalent | 6.39   |  |
| UK                            | Wheatandproducts     | 98.63  |  |
| UK                            | Wine                 | 18.69  |  |
| Tanzania                      | BeveragesAlcoholic   | 0.07   |  |
| Tanzania                      | Maizeandproducts     | 58.47  |  |
| Tanzania                      | Potatoesandproducts  | 22.09  |  |
| Tanzania                      | RiceMilledEquivalent | 21.01  |  |
| Tanzania                      | Wheatandproducts     | 15.94  |  |
| Tanzania                      | Wine                 | 0.12   |  |
| USA                           | BeveragesAlcoholic   | 6.43   |  |
| USA                           | Maizeandproducts     | 12.24  |  |
| USA                           | Potatoesandproducts  | 51.88  |  |
| USA                           | RiceMilledEquivalent | 6.88   |  |
| USA                           | Wheatandproducts     | 80.43  |  |
| USA                           | Wine                 | 8.47   |  |
| Uruguay                       | BeveragesAlcoholic   | 2.24   |  |
| Uruguay                       | Maizeandproducts     | 26.6   |  |
| Uruguay                       | Potatoesandproducts  | 32.8   |  |
| Uruguay                       | RiceMilledEquivalent | 11.5   |  |
| Uruguay                       | Wheatandproducts     | 109.31 |  |
| Uruguay                       | Wine                 | 19.27  |  |
| Uzbekistan                    | BeveragesAlcoholic   | 3.29   |  |
| Uzbekistan                    | Maizeandproducts     | 4.79   |  |
| Uzbekistan                    | Potatoesandproducts  | 52.19  |  |
| Uzbekistan                    | RiceMilledEquivalent | 3.87   |  |
| Uzbekistan                    | Wheatandproducts     | 169.6  |  |
| Uzbekistan                    | Wine                 | 0.99   |  |
| Vanuatu                       | BeveragesAlcoholic   | 1.5    |  |
| Vanuatu                       | Maizeandproducts     | 0.04   |  |
| Vanuatu                       | Potatoesandproducts  | 40.21  |  |
| Vanuatu                       | RiceMilledEquivalent | 41.2   |  |
| Vanuatu                       | Wheatandproducts     | 51.21  |  |
| Vanuatu                       | Wine                 | 1.01   |  |
| VenezuelaBolivarianRepublicof | BeveragesAlcoholic   | 3.16   |  |
| VenezuelaBolivarianRepublicof | Maizeandproducts     | 55.25  |  |
| VenezuelaBolivarianRepublicof | Potatoesandproducts  | 19.2   |  |
| VenezuelaBolivarianRepublicof | RiceMilledEquivalent | 23.39  |  |
| VenezuelaBolivarianRepublicof | Wheatandproducts     | 49.17  |  |
| VenezuelaBolivarianRepublicof | Wine                 | 0.35   |  |
| Vietnam                       | BeveragesAlcoholic   | 3.46   |  |
| Vietnam                       | Maizeandproducts     | 9.74   |  |
| Vietnam                       | Potatoesandproducts  | 3.85   |  |
| Vietnam                       | RiceMilledEquivalent | 144.56 |  |
| Vietnam                       | Wheatandproducts     | 10.49  |  |

```

Vietnam      Wine      0.13
Yemen       BeveragesAlcoholic      0.01
Yemen       Maizeandproducts      13.22
Yemen       Potatoesandproducts      10.99
Yemen       RiceMilledEquivalent      17.36
Yemen       Wheatandproducts      110.24
Yemen       Wine      0
Zambia      BeveragesAlcoholic      0.02
Zambia      Maizeandproducts      118.68
Zambia      Potatoesandproducts      2.42
Zambia      RiceMilledEquivalent      3.05
Zambia      Wheatandproducts      12.1
Zambia      Wine      0.01
Zimbabwe    BeveragesAlcoholic      5.15
Zimbabwe    Maizeandproducts      93.68
Zimbabwe    Potatoesandproducts      3.88
Zimbabwe    RiceMilledEquivalent      10.09
Zimbabwe    Wheatandproducts      31.31
Zimbabwe    Wine      0.27
;
run
;

```

```

/***** DATA Corona 1 June 2020 *****/

```

```

data          corona;
input          Num country
TotalRecovered      ActiveCases      SeriousCases      TotCases1mpop      Deaths1mpop;
cards          ;
1      USA      1837578      408      106198      3      599875      1131505      17075      5554
2      Brazil      514992      143      29341      27      206555      279096      8318      2424
3      Russia      414878      9035      4855      162      175877      234146      2300      2843
4      Spain      286509      .      27127      .      196958      62424      617      6128      580
5      UK      274762      .      38489      .      .      1559      4049      567
6      Italy      232997      .      33415      .      157507      42075      435      3853      553
7      India      191327      718      5413      5      92027      93887      8944      139      4
8      France      188882      .      28802      .      68355      91725      1319      2894      441
9      Germany      183494      .      8605      .      165900      8989      702      2191      103
10     Peru      164476      .      4506      .      67208      92762      988      4994      137
11     Turkey      163942      .      4540      .      127973      31429      648      1946      54
12     Iran      154445      2979      7878      81      121004      25563      2578      1841      9
13     Chile      99688      .      1054      .      42727      55907      1383      5219      55
14     Canada      90947      .      7295      .      48879      34773      1641      2411      193
15     Mexico      90664      3152      9930      151      64326      16408      378      704      77
16     SaudiArabia      85261      .      503      .      62442      22316      384      2452      14
17     China      83017      16      4634      .      78307      76      3      58      3
18     Pakistan      72460      2964      1543      60      26083      44834      111      329      7
19     Belgium      58517      136      9486      19      15919      33112      163      5051      81
20     Qatar      56910      .      38      .      30290      26582      232      19783      13

```

|    |             |       |      |      |    |       |       |       |      |     |   |
|----|-------------|-------|------|------|----|-------|-------|-------|------|-----|---|
| 21 | Bangladesh  | 49534 | 2381 | 672  | 22 | 10597 | 38265 | 1     | 301  | 4   |   |
| 22 | Netherlands | 46442 | .    | 5956 | .  | .     | 159   | 2711  | 348  |     |   |
| 23 | Belarus     | 42556 | .    | 235  | .  | 18514 | 23807 | 92    | 4503 | 25  |   |
| 24 | Ecuador     | 39098 | .    | 3358 | .  | 19592 | 16148 | 220   | 2219 | 191 |   |
| 25 | Sweden      | 37542 | .    | 4395 | .  | 4971  | 28176 | 228   | 3719 | 435 |   |
| 26 | Singapore   | 35292 | 408  | 23   | .  | 21699 | 13570 | 8     | 6036 | 4   |   |
| 27 | UAE         | 34557 | .    | 264  | .  | 17932 | 16361 | 1     | 3498 | 27  |   |
| 28 | SouthAfrica | 32683 | .    | 683  | .  | 16809 | 15191 | 128   | 552  | 12  |   |
| 29 | Portugal    | 32500 | .    | 1410 | .  | 19409 | 11681 | 64    | 3187 | 138 |   |
| 30 | Switzerland | 30871 | 9    | 1920 | .  | 28500 | 451   | 28    | 3569 | 222 |   |
| 31 | Colombia    | 29383 | .    | 939  | .  | 8543  | 19901 | 136   | 578  | 18  |   |
| 32 | Kuwait      | 27762 | 719  | 220  | 8  | 12899 | 14643 | 204   | 6509 | 52  |   |
| 33 | Indonesia   | 26940 | 467  | 1641 | .  | 28    | 7637  | 17662 | .    | 99  | 6 |
| 34 | Ireland     | 24990 | .    | 1652 | .  | 22089 | 1249  | 36    | 5066 | 335 |   |
| 35 | Egypt       | 24985 | .    | 959  | .  | 6037  | 17989 | 41    | 245  | 9   |   |
| 36 | Ukraine     | 24012 | 340  | 718  | 10 | 9690  | 13604 | 283   | 549  | 16  |   |
| 37 | Poland      | 23987 | 201  | 1065 | 1  | 11449 | 11473 | 160   | 634  | 28  |   |
| 38 | Romania     | 19398 | 141  | 1270 | 4  | 13426 | 4702  | 159   | 1008 | 66  |   |
| 39 | Philippines | 18638 | 552  | 960  | 3  | 3979  | 13699 | 73    | 170  | 9   |   |
| 40 | dominr      | 17285 | .    | 502  | .  | 10559 | 6224  | 110   | 1595 | 46  |   |
| 41 | Israel      | 17106 | 35   | 285  | .  | 14826 | 1995  | 33    | 1860 | 31  |   |
| 42 | Japan       | 16851 | .    | 891  | .  | 14459 | 1501  | 119   | 133  | 7   |   |
| 43 | Argentina   | 16851 | .    | 539  | .  | 5336  | 10976 | 259   | 373  | 12  |   |
| 44 | Austria     | 16731 | .    | 668  | .  | 15593 | 470   | 27    | 1859 | 74  |   |
| 45 | Afghanistan | 15750 | 545  | 265  | 8  | 1428  | 14057 | 19    | 405  | 7   |   |
| 46 | Panama      | 13463 | .    | 336  | .  | 9514  | 3613  | 79    | 3125 | 78  |   |
| 47 | Oman        | 12223 | 786  | 50   | 1  | 2682  | 9491  | 31    | 2399 | 10  |   |
| 48 | Denmark     | 11669 | .    | 574  | .  | 10362 | 733   | 20    | 2015 | 99  |   |
| 49 | S.Korea     | 11503 | 35   | 271  | 1  | 10422 | 810   | 15    | 224  | 5   |   |
| 50 | Serbia      | 11412 | .    | 243  | .  | 6698  | 4471  | 10    | 1306 | 28  |   |
| 51 | Bahrain     | 11398 | .    | 19   | .  | 6673  | 4706  | 12    | 6721 | 11  |   |
| 52 | Kazakhstan  | 11308 | 450  | 41   | 1  | 5404  | 5863  | 62    | 603  | 2   |   |
| 53 | Nigeria     | 10162 | .    | 287  | .  | 3007  | 6868  | 7     | 49   | 1   |   |
| 54 | Bolivia     | 9982  | 390  | 313  | 3  | 968   | 8701  | 3     | 856  | 27  |   |
| 55 | Armenia     | 9492  | 210  | 139  | 8  | 3402  | 5951  | 10    | 3204 | 47  |   |
| 56 | Algeria     | 9394  | .    | 653  | .  | 5748  | 2993  | 23    | 215  | 15  |   |
| 57 | Czechia     | 9273  | 5    | 320  | .  | 6562  | 2391  | 15    | 866  | 30  |   |
| 58 | Norway      | 8440  | .    | 236  | .  | 7727  | 477   | 8     | 1558 | 44  |   |
| 59 | Moldova     | 8251  | .    | 295  | .  | 4581  | 3375  | 251   | 2045 | 73  |   |
| 60 | Ghana       | 8070  | 189  | 36   | .  | 2947  | 5087  | 3     | 260  | 1   |   |
| 61 | Malaysia    | 7857  | 38   | 115  | .  | 6404  | 1338  | 8     | 243  | 4   |   |
| 62 | Morocco     | 7819  | 12   | 205  | .  | 5754  | 1860  | 18    | 212  | 6   |   |
| 63 | Australia   | 7204  | 9    | 103  | .  | 6619  | 482   | 3     | 283  | 4   |   |
| 64 | Finland     | 6885  | 26   | 320  | .  | 5500  | 1065  | 10    | 1243 | 58  |   |
| 65 | Iraq        | 6439  | .    | 205  | .  | 3156  | 3078  | 36    | 160  | 5   |   |
| 66 | Cameroon    | 5904  | .    | 191  | .  | 3568  | 2145  | 28    | 223  | 7   |   |
| 67 | Azerbaijan  | 5494  | .    | 63   | .  | 3428  | 2003  | 42    | 542  | 6   |   |
| 68 | Honduras    | 5202  | 108  | 212  | 11 | 537   | 4453  | 13    | 526  | 21  |   |
| 69 | Guatemala   | 5087  | 348  | 108  | 6  | 735   | 4244  | 5     | 284  | 6   |   |
| 70 | Sudan       | 5026  | .    | 286  | .  | 1423  | 3317  | .     | 115  | 7   |   |
| 71 | Luxembourg  | 4018  | .    | 110  | .  | 3833  | 75    | 3     | 6428 | 176 |   |
| 72 | Tajikistan  | 3930  | .    | 47   | .  | 2004  | 1879  | .     | 413  | 5   |   |
| 73 | Hungary     | 3892  | 16   | 527  | 1  | 2156  | 1209  | 25    | 403  | 55  |   |
| 74 | Senegal     | 3739  | 94   | 42   | .  | 1858  | 1839  | 14    | 224  | 3   |   |
| 75 | Guinea      | 3706  | .    | 23   | .  | 2030  | 1653  | 24    | 283  | 2   |   |
| 76 | Uzbekistan  | 3662  | 39   | 15   | .  | 2837  | 810   | 9     | 110  | 0   |   |

|     |                      |      |      |     |     |      |      |      |       |      |     |
|-----|----------------------|------|------|-----|-----|------|------|------|-------|------|-----|
| 77  | Djibouti             | 3354 | .    | 24  | .   | 1504 | 1826 | .    | 3399  | 24   |     |
| 78  | Thailand             | 3082 | 1    | 57  | .   | 2965 | 60   | 1    | 44    | 1    |     |
| 79  | DRC                  | 3070 | .    | 72  | .   | 448  | 2550 | .    | 34    | 1    |     |
| 80  | Greece               | 2917 | .    | 175 | .   | 1374 | 1368 | 13   | 280   | 17   |     |
| 81  | IvoryCoast           | 2833 | .    | 33  | .   | 1435 | 1365 | .    | 108   | 1    |     |
| 82  | Gabon                | 2655 | .    | 17  | .   | 722  | 1916 | 15   | 1195  | 8    |     |
| 83  | ElSalvador           | 2582 | 65   | 46  | .   | 1063 | 1473 | 53   | 398   | 7    |     |
| 84  | BosniaandHerzegovina |      | 2524 | 14  | .   | 154  | 1    | 1888 | 482   | 4    | 769 |
| 85  | Bulgaria             | 2519 | 6    | 140 | .   | 1090 | 1289 | 17   | 362   | 20   |     |
| 86  | Croatia              | 2246 | .    | 103 | .   | 2072 | 71   | 4    | 547   | 25   |     |
| 87  | NorthMacedonia       |      | 2226 | .   | 133 | .    | 1552 | 541  | 21    | 1068 | 64  |
| 88  | Haiti                | 2124 | 259  | 44  | 3   | 24   | 2056 | .    | 186   | 4    |     |
| 89  | Cuba                 | 2045 | .    | 83  | .   | 1809 | 153  | 4    | 181   | 7    |     |
| 90  | Somalia              | 1976 | .    | 78  | .   | 348  | 1550 | 2    | 125   | 5    |     |
| 91  | Kenya                | 1962 | .    | 64  | .   | 478  | 1420 | 7    | 37    | 1    |     |
| 92  | Estonia              | 1870 | 1    | 68  | .   | 1625 | 177  | .    | 1410  | 51   |     |
| 93  | Kyrgyzstan           | 1817 | 69   | 16  | .   | 1181 | 620  | 4    | 279   | 2    |     |
| 94  | Iceland              | 1806 | .    | 10  | .   | 1794 | 2    | .    | 5295  | 29   |     |
| 95  | Nepal                | 1798 | 226  | 8   | .   | 221  | 1569 | .    | 62    | 0    |     |
| 96  | Maldives             | 1773 | .    | 5   | .   | 453  | 1315 | 9    | 3285  | 9    |     |
| 97  | Mayotte              | 1699 | .    | 21  | .   | 1385 | 293  | 9    | 6242  | 77   |     |
| 98  | Lithuania            | 1678 | 3    | 70  | .   | 1236 | 372  | 17   | 616   | 26   |     |
| 99  | SriLanka             | 1633 | .    | 11  | 1   | 801  | 821  | 1    | 76    | 1    |     |
| 100 | Slovakia             | 1522 | 1    | 28  | .   | 1368 | 126  | .    | 279   | 5    |     |
| 101 | Venezuela            | 1510 | .    | 14  | .   | 302  | 1194 | 3    | 53    | 1    |     |
| 102 | NewZealand           | 1504 | .    | 22  | .   | 1481 | 1    | .    | 301   | 4    |     |
| 103 | Slovenia             | 1473 | .    | 109 | 1   | 1358 | 6    | 1    | 709   | 52   |     |
| 104 | EquatorialGuinea     |      | 1306 | .   | 12  | .    | 200  | 1094 | .     | 934  | 9   |
| 105 | Mali                 | 1265 | .    | 77  | .   | 716  | 472  | .    | 63    | 4    |     |
| 106 | Guinea-Bissau        |      | 1256 | .   | 8   | .    | 42   | 1206 | .     | 640  | 4   |
| 107 | Lebanon              | 1220 | .    | 27  | .   | 712  | 481  | 3    | 179   | 4    |     |
| 108 | Ethiopia             | 1172 | .    | 11  | .   | 209  | 952  | 4    | 10    | 0    |     |
| 109 | Albania              | 1143 | 6    | 33  | .   | 877  | 233  | 3    | 397   | 11   |     |
| 110 | Zambia               | 1089 | 32   | 7   | .   | 912  | 170  | 1    | 59    | 0    |     |
| 111 | HongKong             | 1088 | 3    | 4   | .   | 1037 | 47   | 2    | 145   | 1    |     |
| 112 | Tunisia              | 1084 | 7    | 48  | .   | 964  | 72   | 2    | 92    | 4    |     |
| 113 | Latvia               | 1066 | .    | 24  | .   | 745  | 297  | 3    | 565   | 13   |     |
| 114 | CostaRica            | 1056 | .    | 10  | .   | 669  | 377  | 4    | 207   | 2    |     |
| 115 | CAR                  | 1011 | .    | 2   | .   | 23   | 986  | .    | 210   | 0    |     |
| 116 | SouthSudan           | 994  | .    | 10  | .   | 6    | 978  | .    | 89    | 1    |     |
| 117 | Paraguay             | 986  | .    | 11  | .   | 477  | 498  | 2    | 138   | 2    |     |
| 118 | Niger                | 958  | .    | 64  | .   | 839  | 55   | .    | 40    | 3    |     |
| 119 | Cyprus               | 944  | .    | 17  | .   | 790  | 137  | 4    | 782   | 14   |     |
| 120 | SierraLeone          | 861  | .    | 46  | .   | 454  | 361  | .    | 108   | 6    |     |
| 121 | BurkinaFaso          | 847  | .    | 53  | .   | 720  | 74   | .    | 41    | 3    |     |
| 122 | Madagascar           | 826  | 55   | 6   | .   | 174  | 646  | 8    | 30    | 0    |     |
| 123 | Uruguay              | 823  | .    | 22  | .   | 685  | 116  | 5    | 237   | 6    |     |
| 124 | Georgia              | 794  | 11   | 12  | .   | 624  | 158  | 6    | 199   | 3    |     |
| 125 | Chad                 | 778  | .    | 65  | .   | 491  | 222  | .    | 47    | 4    |     |
| 126 | Andorra              | 764  | .    | 51  | .   | 694  | 19   | 4    | 9889  | 660  |     |
| 127 | Nicaragua            | 759  | .    | 35  | .   | 370  | 354  | .    | 115   | 5    |     |
| 128 | Jordan               | 739  | .    | 9   | .   | 522  | 208  | 5    | 72    | 1    |     |
| 129 | DiamondPrincess      |      | 712  | .   | 13  | .    | 651  | 48   | 4     | .    |     |
| 130 | SanMarino            | 671  | .    | 42  | .   | 359  | 270  | 1    | 19779 | 1238 |     |
| 131 | Malta                | 619  | 1    | 9   | .   | 537  | 73   | 1    | 1402  | 20   |     |
| 132 | Congo                | 611  | .    | 20  | .   | 179  | 412  | .    | 111   | 4    |     |

|     |                      |     |     |    |    |     |     |     |      |      |     |
|-----|----------------------|-----|-----|----|----|-----|-----|-----|------|------|-----|
| 133 | Jamaica              | 586 | 5   | 9  | .  | 311 | 266 | 2   | 198  | 3    |     |
| 134 | ChannelIslands       |     | 560 | .  | 45 | .   | 515 | 0   | .    | 3223 | 259 |
| 135 | Mauritania           | 530 | .   | 23 | .  | 27  | 480 | .   | 114  | 5    |     |
| 136 | Tanzania             | 509 | .   | 21 | .  | 183 | 305 | 7   | 9    | 0    |     |
| 137 | FrenchGuiana         | 499 | .   | 1  | .  | 200 | 298 | 2   | 1675 | 3    |     |
| 138 | SaoTomeandPrincipe   |     | 483 | .  | 12 | .   | 68  | 403 | .    | 2208 | 55  |
| 139 | Réunion              | 471 | .   | 1  | .  | 411 | 59  | 1   | 526  | 1    |     |
| 140 | Uganda               | 457 | 40  | .  | .  | 72  | 385 | .   | 10   | .    |     |
| 141 | Palestine            | 449 | 1   | 3  | .  | 372 | 74  | .   | 88   | 1    |     |
| 142 | Taiwan               | 443 | 1   | 7  | .  | 427 | 9   | .   | 19   | 0    |     |
| 143 | Togo                 | 442 | .   | 13 | .  | 211 | 218 | .   | 54   | 2    |     |
| 144 | CaboVerde            | 435 | .   | 4  | .  | 193 | 238 | .   | 783  | 7    |     |
| 145 | Rwanda               | 370 | .   | 1  | .  | 256 | 113 | .   | 29   | 0    |     |
| 146 | IsleofMan            | 336 | .   | 24 | .  | 309 | 3   | .   | 3953 | 282  |     |
| 147 | Mauritius            | 335 | .   | 10 | .  | 322 | 3   | .   | 263  | 8    |     |
| 148 | Vietnam              | 328 | .   | .  | .  | 293 | 35  | 1   | 3    | .    |     |
| 149 | Montenegro           | 324 | .   | 9  | .  | 315 | 0   | .   | 516  | 14   |     |
| 150 | Yemen                | 323 | .   | 80 | .  | 14  | 229 | .   | 11   | 3    |     |
| 151 | Liberia              | 288 | .   | 27 | .  | 157 | 104 | .   | 57   | 5    |     |
| 152 | Eswatini             | 285 | .   | 2  | .  | 189 | 94  | .   | 246  | 2    |     |
| 153 | Malawi               | 284 | .   | 4  | .  | 42  | 238 | 1   | 15   | 0    |     |
| 154 | Mozambique           | 254 | .   | 2  | .  | 91  | 161 | .   | 8    | 0    |     |
| 155 | Benin                | 232 | .   | 3  | .  | 143 | 86  | .   | 19   | 0    |     |
| 156 | Myanmar              | 228 | 4   | 6  | .  | 138 | 84  | .   | 4    | 0    |     |
| 157 | Martinique           | 200 | .   | 14 | .  | 98  | 88  | .   | 533  | 37   |     |
| 158 | FaeroeIslands        | 187 | .   | .  | .  | 187 | 0   | .   | 3828 | .    |     |
| 159 | Mongolia             | 185 | 6   | .  | .  | 44  | 141 | 19  | 57   | .    |     |
| 160 | Zimbabwe             | 178 | .   | 4  | .  | 29  | 145 | .   | 12   | 0    |     |
| 161 | Gibraltar            | 170 | .   | .  | .  | 151 | 19  | .   | 5046 | .    |     |
| 162 | Guadeloupe           | 162 | .   | 14 | .  | 138 | 10  | 1   | 405  | 35   |     |
| 163 | Libya                | 156 | .   | 5  | .  | 52  | 99  | .   | 23   | 1    |     |
| 164 | Guyana               | 153 | .   | 12 | .  | 70  | 71  | 2   | 195  | 15   |     |
| 165 | Brunei               | 141 | .   | 2  | .  | 138 | 1   | 1   | 323  | 5    |     |
| 166 | CaymanIslands        | 141 | .   | 1  | .  | 68  | 72  | .   | 2148 | 15   |     |
| 167 | Bermuda              | 140 | .   | 9  | .  | 92  | 39  | 2   | 2247 | 144  |     |
| 168 | Cambodia             | 125 | .   | .  | .  | 123 | 2   | 1   | 7    | .    |     |
| 169 | Syria                | 122 | .   | 5  | .  | 46  | 71  | .   | 7    | 0    |     |
| 170 | TrinidadandTobago    |     | 117 | .  | 8  | .   | 108 | 1   | .    | 84   | 6   |
| 171 | Comoros              | 106 | .   | 2  | .  | 26  | 78  | .   | 122  | 2    |     |
| 172 | Bahamas              | 102 | .   | 11 | .  | 48  | 43  | 1   | 260  | 28   |     |
| 173 | Aruba                | 101 | .   | 3  | .  | 98  | 0   | .   | 946  | 28   |     |
| 174 | Monaco               | 99  | .   | 4  | .  | 90  | 5   | 1   | 2524 | 102  |     |
| 175 | Barbados             | 92  | .   | 7  | .  | 76  | 9   | 1   | 320  | 24   |     |
| 176 | Angola               | 86  | .   | 4  | .  | 18  | 64  | 1   | 3    | 0    |     |
| 177 | Liechtenstein        | 82  | .   | 1  | .  | 55  | 26  | .   | 2151 | 26   |     |
| 178 | SintMaarten          | 77  | .   | 15 | .  | 60  | 2   | 1   | 1798 | 350  |     |
| 179 | Burundi              | 63  | .   | 1  | .  | 33  | 29  | .   | 5    | 0    |     |
| 180 | FrenchPolynesia      |     | 60  | .  | .  | .   | 60  | 0   | .    | 214  | .   |
| 181 | Macao                | 45  | .   | .  | .  | 45  | 0   | .   | 69   | .    |     |
| 182 | Bhutan               | 43  | .   | .  | .  | 6   | 37  | .   | 56   | .    |     |
| 183 | SaintMartin          | 41  | .   | 3  | .  | 33  | 5   | 1   | 1062 | 78   |     |
| 184 | Eritrea              | 39  | .   | .  | .  | 39  | 0   | .   | 11   | .    |     |
| 185 | Botswana             | 38  | 3   | 1  | .  | 20  | 17  | .   | 16   | 0    |     |
| 186 | AntiguaandBarbuda    |     | 26  | .  | 3  | .   | 19  | 4   | 1    | 266  | 31  |
| 187 | St.VincentGrenadines |     | 26  | .  | .  | .   | 15  | 11  | .    | 234  | .   |
| 188 | Gambia               | 25  | .   | 1  | .  | 20  | 4   | .   | 10   | 0    |     |

|     |                      |    |   |   |   |   |    |    |   |       |      |    |
|-----|----------------------|----|---|---|---|---|----|----|---|-------|------|----|
| 189 | Namibia              | 25 | 1 | . | . | . | 16 | 9  | . | 10    | .    |    |
| 190 | Timor-Leste          | 24 | . | . | . | . | 24 | 0  | . | 18    | .    |    |
| 191 | Suriname             | 23 | . | 1 | . | . | 9  | 13 | . | 39    | 2    |    |
| 192 | Grenada              | 23 | . | . | . | . | 18 | 5  | 2 | 204   | .    |    |
| 193 | NewCaledonia         | 20 | 1 | . | . | . | 18 | 2  | . | 70    | .    |    |
| 194 | Curaçao              | 19 | . | 1 | . | . | 14 | 4  | . | 116   | 6    |    |
| 195 | Laos                 | 19 | . | . | . | . | 16 | 3  | . | 3     | .    |    |
| 196 | Belize               | 18 | . | 2 | . | . | 16 | 0  | . | 45    | 5    |    |
| 197 | Fiji                 | 18 | . | . | . | . | 15 | 3  | . | 20    | .    |    |
| 198 | SaintLucia           | 18 | . | . | . | . | 18 | 0  | . | 98    | .    |    |
| 199 | Dominica             | 16 | . | . | . | . | 16 | 0  | . | 222   | .    |    |
| 200 | SaintKittsandNevis   | 15 | . | . | . | . | .  | 15 | 0 | .     | 282  | .  |
| 201 | FalklandIslands      | 13 | . | . | . | . | .  | 13 | 0 | .     | 3746 | .  |
| 202 | Greenland            | 13 | . | . | . | . | 11 | 2  | . | 229   | .    |    |
| 203 | TurksandCaicos       | 12 | . | 1 | . | . | .  | 11 | 0 | .     | 310  | 26 |
| 204 | VaticanCity          | 12 | . | . | . | . | 2  | 10 | . | 14981 | .    |    |
| 205 | Montserrat           | 11 | . | 1 | . | . | 10 | 0  | . | 2204  | 200  |    |
| 206 | Seychelles           | 11 | . | . | . | . | 11 | 0  | . | 112   | .    |    |
| 207 | MSZaandam            | 9  | . | 2 | . | . | .  | 7  | . | .     | .    |    |
| 208 | WesternSahara        | 9  | . | 1 | . | . | 6  | 2  | . | 15    | 2    |    |
| 209 | BritishVirginIslands | 8  | . | . | 1 | . | .  | 7  | 0 | .     | 265  | 33 |
| 210 | PapuaNewGuinea       | 8  | . | . | . | . | 8  | 0  | . | 1     | .    |    |
| 211 | CaribbeanNetherlands | 7  | . | . | . | . | .  | 7  | 0 | .     | 267  | .  |
| 212 | St.Barth             | 6  | . | . | . | . | 6  | 0  | . | 608   | .    |    |
| 213 | Anguilla             | 3  | . | . | . | . | 3  | 0  | . | 200   | .    |    |
| 214 | Lesotho              | 2  | . | . | . | . | 1  | 1  | . | 1     | .    |    |
| 215 | SaintPierreMiquelon  | 1  | . | . | . | . | .  | 1  | 0 | .     | 173  | .  |

```

;
run
;

```

```

proc
run
;
means
data

```

```

proc
by
element;
sort
data

```

```

proc
by
run
country;
sort
data

```

```

proc
by
run
country;
sort
data

```

```

data
set
if
keep
run
;
pig;
food;
element=
country quantity;
"P

```

```

data
set
rename
run
;

data
set
if
keep
run
;

data
set
rename
run
proc
run
;

data
set
if
keep
run
;

data
set
rename
run
proc
run
;

data
set
if
keep
run
data
set
rename
run
proc
run
;

data
set
if
keep
run
data
set
rename
run
proc
run
;

data
set
if
keep
run
data
set
rename
run
proc
run
;

```

pig2;

pig;

quantity=pig;

bov;

food;

element=

"BovineMe"

country quantity;

bov2;

bov;

quantity=bov;

means

data

che;

food;

element=

"Cheese"

country quantity;

che2;

che;

quantity=che;

means

data

cre;

food;

element=

"Cream"

country quantity;

cre2;

cre;

quantity=cre;

egg;

food;

element=

"Eggs"

country quantity;

egg2;

egg;

quantity=Egg;

means

data

```

data
set
if
keep
run
data
set
rename
run

                Fre;                                /* freshwater fish
                food;
element=
                country quantity;                    "Freshwat"
;
                fre2;
                fre;
                quantity=freshf;
;

data
set
if
keep
run
data
set
rename
run

                hon;                                /* Honey */
                food;
element=
                country quantity;                    "Honey"
;
                hon2;
                hon;
                quantity=hon;
;

data
set
if
keep
run
data
set
rename
run

                mil;
                food;
element=
                country quantity;                    "MilkWhol"
;
                mil2;
                mil;
                quantity=milk;
;

data
set
if
keep
run
data
set
rename
run

                pou;
                food;
element=
                country quantity;                    "PoultryM"
;
                pou2;
                pou;
                quantity=poul;
;

data
set
if
keep
run
data
set
rename
run

                dem;
                food;
element=
                country quantity;                    "Demersal"
;
                dem2;
                dem;
                quantity=demer;
;

```



```
data
set
if
keep
run
data
set
rename
run
        cep;
        food;
        element=
        country quantity;
        ;
        cep2;
        cep;
        quantity=ceph;
```

"Cephalop"

```
data
set
if
keep
run
data
set
rename
run
        but;
        food;
        element=
        country quantity;
        ;
        but2;
        but;
        quantity=butg;
```

"ButterGh"

```
data
set
if
keep
rename
run
        mar;
        food;
        element=
        country quantity;
        quantity=marf;
```

"MarineFi"

```
data
set
if
keep
rename
run
        aqp;
        food;
        element=
        country quantity;
        quantity=aqp;
```

"AquaticP"

```
data
set
if
keep
rename
run
        bev;
        crop;
        element=
        country quantity;
        quantity=bev;
```

"Beverage"

```
data
set
if
keep
run
data
set
rename
run
        rice;
        crop;
        element=
        country quantity;
        ;
        rice2;
        rice;
        quantity=rice;
```

"RiceMill"

```

data
set
if
keep
rename
run
        crop;
        element=
        country quantity;
        quantity=potato;
        ;

data
set
if
keep
rename
run
        maiz;
        crop;
        element=
        country quantity;
        quantity=maiz;
        ;

data
set
if
keep
rename
run
        wheat;
        crop;
        element=
        country quantity;
        quantity=wheat;
        ;

data
set
if
keep
rename
run
        wine;
        crop;
        element=
        country quantity;
        quantity=wine;
        ;

proc
by
run
        country;
        ;
        sort

data
merge
by
run
        all;
        country;
        ;
        all2;
        all corona;
        country;
        ;

data
set
logtot=log(Totalcases+
logt1m=log(TotCases1mpop+
logpig=log(pig+
logbov=log(bov+
logche=log(che+
        all2;
        all3;

```

```

logcre=log(cre+
logegg=log(egg+
logfreshf=log(freshf+
loghon=log(hon+
logmilk=log(milk+
logpoul=log(poul+
logdemer=log(demer+
logceph=log(ceph+
logbutg=log(butg+
logmarf=log(marf+
logaqp=log(aqp+
logbev=log(bev+
logrice=log(rice+
logpotato=log(potato+
logmaiz=log(maiz+
logwheat=log(wheat+
logwine=log(wine+
run ;

/*

proc print data=all3;
var country totalcases logttot pig logpig;
run;
*/

proc univariate
var logttot totalcases pig logpig che logche bov logbov cre logcre egg logegg ;
run ;

proc means data
run ;

proc freq data
table country;
run ;

/*

proc freq data=all3;
table country;
run;
*/

/***** CORR *****/
proc title " corr " data
var Totalcases logttot ;
with logpig logbov logche logcre logegg logfreshf loghon logmilk logpoul

```

```

logdemer logceph logbutg logmarf logaqp
logbev logrice logpotato logmaiz logwheat logwine ;
run ;

/*****
***** REG *****/
/*****
*****

/*

*/

proc reg data=logtot model logtot = logpig logbov logche logcre logegg logfreshf loghon logmilk logpoul
logdemer logceph logbutg logmarf logaqp
logrice logpotato logmaiz logwheat
/ selection=stepwise slentry=
title " logtot model log"
run ;
quit;

/*****
***** LASSO *****/
/*****
*****

ods graphics on/ labelmax=400;
title " logtot lasso ";
proc glmselect data=all3 plots=all ;
model logtot = pig bov che cre egg freshf hon milk poul
demer ceph butg marf aqp
rice potato maiz wheat / selection=lasso (choose =cp steps=100
run;

ods rtf close;

*/

ods graphics on/ labelmax=

```

```

                                title                                " tot arithm lass
proc                                glmselect
model logtot =logpig logbov logche logcre logegg logfreshf loghon logmilk logpoul
                                logdemer logceph logbutg logmarf logaqp
                                logrice logpotato logmaiz logwheat / selection=lasso (choose =cp st
run                                ;

ods rtf close;

/*****
/***** PCA *****/
/*****
/*****

/*

ods graphics on;

proc princomp data=all3 n=3 plots (ncomp=3)=pattern;
    id country;
        var logtot logpig logbov logche logcre logegg logfreshf loghon logmilk logpo
            logdemer logceph logbutg logmarf logaqp
            logbev logrice logpotato logmaiz logwheat logwine ;
title ' logtot logarithmic PCA of Food Consumption and COVID-19 Parameters ';
run;
ods rtf close;

*/

ods graphics on;

proc                                princomp
    id country;
        var totalcases pig bov che cre egg freshf hon milk poul
            demer butg
            rice potato maiz wheat;
;
```

```
title 'model 2 PCA of Food Consumption and COVID-19 Par

run ;
ods rtf close;

/***** Bayesian *****/

ods graphics on ;
proc genmod
  model logtot =logpig logbov logche logcre logegg logfreshf loghon logmilk logpoul
              logdemer logceph logbutg logmarf logaqp
              logbev logrice logpotato logmaiz logwheat logwine ;
run ;
ods rtf close;

/**** Statements compute the estimate of the probability ofbeing positive *****/

data
  set Prob;
  PostSurg;

  pig2 = (logpig >
  bov2=(logbov >

  che2=(logche >
  cre2=(logcre >
  egg2=(logegg>
freshf2=(logfreshf>
hon2=(loghon>
  milk2=(logmilk >
ceph2=(logceph>
  butg2=(logbutg>

  marf2=(logmarf>
  aqp2=(logaqp>
  bev2=(logbev >
  rice2=(logrice>
  ricen2=(logrice<

  potato2=(logpotato>
```

```

maiz2=(logmaiz>
maizn2=(logmaiz <
wheat2=(logwheat>
wine2=(logwine>

run ;

title " logtot logaritmic freshfn2=(freshf<0) "
proc Means data
    bov2 che2 cre2 egg2 freshf2 freshfn2 hon2 milk2 poul2 demer2
    cep2 butg2 marf2 marfn2 marfn2 aqp2
    bev2 rice2 ricen2 potato2 maiz2 maizn2 wheat2 wine2 ) n mean;
run ;

quit;

```

```

/*****
/*      Animal And Crop Production with COVID 19      1 June 2020      */
/*                                                              */
/*****

```

```

data animal;
input country
cards ;
Afghanistan Asses 2018 Head 1354718
Afghanistan Camels 2018 Head 171832
Afghanistan Cattle 2018 Head 5022606
Afghanistan Chickens 2018 1000Head 14152
Afghanistan Goats 2018 Head 7749561
Afghanistan Horses 2018 Head 179819
Afghanistan Mules 2018 Head 23811
Afghanistan Sheep 2018 Head 14023689
Albania Asses 2018 Head 56000
Albania Beehives 2018 No 285455
Albania Buffaloes 2018 Head 95
Albania Cattle 2018 Head 467318
Albania Chickens 2018 1000Head 7272
Albania Ducks 2018 1000Head .
Albania Geeseandguineafowls 2018 1000Head .
Albania Goats 2018 Head 917155
Albania Horses 2018 Head 31905
Albania Mules 2018 Head .
Albania Pigs 2018 Head 184133
Albania Sheep 2018 Head 1863837
Albania Turkeys 2018 1000Head 403
Algeria Asses 2018 Head 84051
Algeria Beehives 2018 No 411713
Algeria Camels 2018 Head 417322
Algeria Cattle 2018 Head 1813192
Algeria Chickens 2018 1000Head 136063

```

|                   |                     |      |          |          |       |
|-------------------|---------------------|------|----------|----------|-------|
| Algeria           | Ducks               | 2018 | 1000Head | 54       |       |
| Algeria           | Geeseandguineafowls |      | 2018     | 1000Head | 37    |
| Algeria           | Goats               | 2018 | Head     | 4904254  |       |
| Algeria           | Horses              | 2018 | Head     | 46356    |       |
| Algeria           | Mules               | 2018 | Head     | 16808    |       |
| Algeria           | Pigs                | 2018 | Head     | 4703     |       |
| Algeria           | Rabbitsandhares     |      | 2018     | 1000Head | 1694  |
| Algeria           | Sheep               | 2018 | Head     | 28693330 |       |
| Algeria           | Turkeys             | 2018 | 1000Head | 96       |       |
| AmericanSamoa     | Cattle              |      | 2018     | Head     | 111   |
| AmericanSamoa     | Chickens            |      | 2018     | 1000Head | 41    |
| AmericanSamoa     | Pigs                |      | 2018     | Head     | 10500 |
| Angola            | Asses               | 2018 | Head     | 4443     |       |
| Angola            | Beehives            | 2018 | No       | 1153618  |       |
| Angola            | Cattle              | 2018 | Head     | 5044019  |       |
| Angola            | Chickens            | 2018 | 1000Head | 30892    |       |
| Angola            | Goats               | 2018 | Head     | 4599013  |       |
| Angola            | Horses              | 2018 | Head     | 1015     |       |
| Angola            | Pigs                | 2018 | Head     | 2678728  |       |
| Angola            | Sheep               | 2018 | Head     | 1170996  |       |
| AntiguaandBarbuda | Asses               |      | 2018     | Head     | 1727  |
| AntiguaandBarbuda | Cattle              |      | 2018     | Head     | 4710  |
| AntiguaandBarbuda | Chickens            |      | 2018     | 1000Head | 159   |
| AntiguaandBarbuda | Goats               |      | 2018     | Head     | 26969 |
| AntiguaandBarbuda | Horses              |      | 2018     | Head     | 496   |
| AntiguaandBarbuda | Pigs                |      | 2018     | Head     | 4989  |
| AntiguaandBarbuda | Sheep               |      | 2018     | Head     | 13861 |
| Argentina         | Asses               | 2018 | Head     | 99604    |       |
| Argentina         | Beehives            | 2018 | No       | 3020370  |       |
| Argentina         | Cattle              | 2018 | Head     | 53928990 |       |
| Argentina         | Chickens            | 2018 | 1000Head | 113600   |       |
| Argentina         | Ducks               | 2018 | 1000Head | 2588     |       |
| Argentina         | Geeseandguineafowls |      | 2018     | 1000Head | 172   |
| Argentina         | Goats               | 2018 | Head     | 4567479  |       |
| Argentina         | Horses              | 2018 | Head     | 2611240  |       |
| Argentina         | Mules               | 2018 | Head     | 185736   |       |
| Argentina         | Pigs                | 2018 | Head     | 5648637  |       |
| Argentina         | Rabbitsandhares     |      | 2018     | 1000Head | 1173  |
| Argentina         | Sheep               | 2018 | Head     | 14339908 |       |
| Argentina         | Turkeys             | 2018 | 1000Head | 3014     |       |
| Armenia           | Asses               | 2018 | Head     | 1758     |       |
| Armenia           | Beehives            | 2018 | No       | 236242   |       |
| Armenia           | Buffaloes           | 2018 | Head     | 717      |       |
| Armenia           | Cattle              | 2018 | Head     | 590585   |       |
| Armenia           | Chickens            | 2018 | 1000Head | 4406     |       |
| Armenia           | Goats               | 2018 | Head     | 22081    |       |
| Armenia           | Horses              | 2018 | Head     | 10049    |       |
| Armenia           | Mules               | 2018 | Head     | 25       |       |
| Armenia           | Pigs                | 2018 | Head     | 166757   |       |
| Armenia           | Rabbitsandhares     |      | 2018     | 1000Head | 28    |
| Armenia           | Sheep               | 2018 | Head     | 637978   |       |
| Armenia           | Turkeys             | 2018 | 1000Head | 171      |       |
| Aruba             | Chickens            | 2018 | 1000Head | .        |       |
| Aruba             | Goats               | 2018 | Head     | .        |       |
| Aruba             | Horses              | 2018 | Head     | .        |       |
| Aruba             | Pigs                | 2018 | Head     | .        |       |



| Country    | Animal              | Year | Unit     | Value    | Other |
|------------|---------------------|------|----------|----------|-------|
| Aruba      | Sheep               | 2018 | Head     | .        |       |
| Australia  | Asses               | 2018 | Head     | 1919     |       |
| Australia  | Beehives            | 2018 | No       | 374697   |       |
| Australia  | Buffaloes           | 2018 | Head     | .        |       |
| Australia  | Cattle              | 2018 | Head     | 26395734 |       |
| Australia  | Chickens            | 2018 | 1000Head | 98410    |       |
| Australia  | Ducks               | 2018 | 1000Head | 1346     |       |
| Australia  | Goats               | 2018 | Head     | 3631828  |       |
| Australia  | Horses              | 2018 | Head     | 235078   |       |
| Australia  | Pigs                | 2018 | Head     | 2534030  |       |
| Australia  | Sheep               | 2018 | Head     | 70067316 |       |
| Australia  | Turkeys             | 2018 | 1000Head | 1188     |       |
| Austria    | Beehives            | 2018 | No       | 372900   |       |
| Austria    | Cattle              | 2018 | Head     | 1943476  |       |
| Austria    | Chickens            | 2018 | 1000Head | 16887    |       |
| Austria    | Ducks               | 2018 | 1000Head | 57       |       |
| Austria    | Geeseandguineafowls | 2018 | 1000Head | 28       |       |
| Austria    | Goats               | 2018 | Head     | 91134    |       |
| Austria    | Horses              | 2018 | Head     | 92979    |       |
| Austria    | Pigs                | 2018 | Head     | 2820082  |       |
| Austria    | Rabbitsandhares     | 2018 | 1000Head | 204      |       |
| Austria    | Sheep               | 2018 | Head     | 401480   |       |
| Austria    | Turkeys             | 2018 | 1000Head | 593      |       |
| Azerbaijan | Asses               | 2018 | Head     | 28040    |       |
| Azerbaijan | Beehives            | 2018 | No       | 500980   |       |
| Azerbaijan | Buffaloes           | 2018 | Head     | 176195   |       |
| Azerbaijan | Camels              | 2018 | Head     | 239      |       |
| Azerbaijan | Cattle              | 2018 | Head     | 2482627  |       |
| Azerbaijan | Chickens            | 2018 | 1000Head | 30498    |       |
| Azerbaijan | Goats               | 2018 | Head     | 622426   |       |
| Azerbaijan | Horses              | 2018 | Head     | 65211    |       |
| Azerbaijan | Mules               | 2018 | Head     | 53       |       |
| Azerbaijan | Pigs                | 2018 | Head     | 5485     |       |
| Azerbaijan | Sheep               | 2018 | Head     | 7681674  |       |
| Azerbaijan | Turkeys             | 2018 | 1000Head | 1140     |       |
| Bahamas    | Cattle              | 2018 | Head     | 739      |       |
| Bahamas    | Chickens            | 2018 | 1000Head | 3187     |       |
| Bahamas    | Goats               | 2018 | Head     | 14990    |       |
| Bahamas    | Horses              | 2018 | Head     | .        |       |
| Bahamas    | Pigs                | 2018 | Head     | 5012     |       |
| Bahamas    | Sheep               | 2018 | Head     | 6729     |       |
| Bahrain    | Asses               | 2018 | Head     | .        |       |
| Bahrain    | Camels              | 2018 | Head     | 1092     |       |
| Bahrain    | Cattle              | 2018 | Head     | 9844     |       |
| Bahrain    | Chickens            | 2018 | 1000Head | 542      |       |
| Bahrain    | Goats               | 2018 | Head     | 17350    |       |
| Bahrain    | Sheep               | 2018 | Head     | 38650    |       |
| Bangladesh | Buffaloes           | 2018 | Head     | 1485000  |       |
| Bangladesh | Cattle              | 2018 | Head     | 24086000 |       |
| Bangladesh | Chickens            | 2018 | 1000Head | 282145   |       |
| Bangladesh | Ducks               | 2018 | 1000Head | 55853    |       |
| Bangladesh | Goats               | 2018 | Head     | 60074080 |       |
| Bangladesh | Sheep               | 2018 | Head     | 2274116  |       |
| Barbados   | Asses               | 2018 | Head     | 2285     |       |
| Barbados   | Cattle              | 2018 | Head     | 10767    |       |
| Barbados   | Chickens            | 2018 | 1000Head | 3680     |       |

|          |                                   |      |          |         |  |
|----------|-----------------------------------|------|----------|---------|--|
| Barbados | Goats                             | 2018 | Head     | 5511    |  |
| Barbados | Horses                            | 2018 | Head     | 1265    |  |
| Barbados | Mules                             | 2018 | Head     | 2000    |  |
| Barbados | Pigs                              | 2018 | Head     | 23405   |  |
| Barbados | Sheep                             | 2018 | Head     | 13802   |  |
| Barbados | Turkeys                           | 2018 | 1000Head | 74      |  |
| Belarus  | Asses                             | 2018 | Head     | 9028    |  |
| Belarus  | Beehives                          | 2018 | No       | 207     |  |
| Belarus  | Cattle                            | 2018 | Head     | 4341500 |  |
| Belarus  | Chickens                          | 2018 | 1000Head | 46081   |  |
| Belarus  | Ducks                             | 2018 | 1000Head | 1787    |  |
| Belarus  | Goats                             | 2018 | Head     | 63300   |  |
| Belarus  | Horses                            | 2018 | Head     | 43500   |  |
| Belarus  | Pigs                              | 2018 | Head     | 2840600 |  |
| Belarus  | Rabbitsandhares                   | 2018 | 1000Head | 301     |  |
| Belarus  | Sheep                             | 2018 | Head     | 87600   |  |
| Belarus  | Turkeys                           | 2018 | 1000Head | 1226    |  |
| Belgium  | Asses                             | 2018 | Head     | 2       |  |
| Belgium  | Beehives                          | 2018 | No       | 33734   |  |
| Belgium  | Cattle                            | 2018 | Head     | 2398090 |  |
| Belgium  | Chickens                          | 2018 | 1000Head | 32327   |  |
| Belgium  | Ducks                             | 2018 | 1000Head | 202     |  |
| Belgium  | Geeseandguinea <span>fowls</span> | 2018 | 1000Head | 4       |  |
| Belgium  | Goats                             | 2018 | Head     | 90404   |  |
| Belgium  | Horses                            | 2018 | Head     | 33656   |  |
| Belgium  | Pigs                              | 2018 | Head     | 6209131 |  |
| Belgium  | Rabbitsandhares                   | 2018 | 1000Head | 184     |  |
| Belgium  | Sheep                             | 2018 | Head     | 86672   |  |
| Belgium  | Turkeys                           | 2018 | 1000Head | 221     |  |
| Belize   | Beehives                          | 2018 | No       | 1984    |  |
| Belize   | Cattle                            | 2018 | Head     | 117375  |  |
| Belize   | Chickens                          | 2018 | 1000Head | 1632    |  |
| Belize   | Ducks                             | 2018 | 1000Head | 13      |  |
| Belize   | Goats                             | 2018 | Head     | 191     |  |
| Belize   | Horses                            | 2018 | Head     | 6033    |  |
| Belize   | Mules                             | 2018 | Head     | 4647    |  |
| Belize   | Pigs                              | 2018 | Head     | 23374   |  |
| Belize   | Sheep                             | 2018 | Head     | 15751   |  |
| Belize   | Turkeys                           | 2018 | 1000Head | 52      |  |
| Benin    | Asses                             | 2018 | Head     | 625     |  |
| Benin    | Cattle                            | 2018 | Head     | 2462000 |  |
| Benin    | Chickens                          | 2018 | 1000Head | 21304   |  |
| Benin    | Goats                             | 2018 | Head     | 1921000 |  |
| Benin    | Horses                            | 2018 | Head     | 1039    |  |
| Benin    | Pigs                              | 2018 | Head     | 504000  |  |
| Benin    | Sheep                             | 2018 | Head     | 954000  |  |
| Bermuda  | Asses                             | 2018 | Head     | 6       |  |
| Bermuda  | Cattle                            | 2018 | Head     | 640     |  |
| Bermuda  | Chickens                          | 2018 | 1000Head | 52      |  |
| Bermuda  | Ducks                             | 2018 | 1000Head | .       |  |
| Bermuda  | Goats                             | 2018 | Head     | 371     |  |
| Bermuda  | Horses                            | 2018 | Head     | 1025    |  |
| Bermuda  | Mules                             | 2018 | Head     | 1       |  |
| Bermuda  | Pigs                              | 2018 | Head     | 809     |  |
| Bhutan   | Asses                             | 2018 | Head     | 17969   |  |
| Bhutan   | Buffaloes                         | 2018 | Head     | 531     |  |

|                      |                     |      |          |           |  |  |
|----------------------|---------------------|------|----------|-----------|--|--|
| Bhutan               | Cattle              | 2018 | Head     | 298601    |  |  |
| Bhutan               | Chickens            | 2018 | 1000Head | 800       |  |  |
| Bhutan               | Goats               | 2018 | Head     | 43839     |  |  |
| Bhutan               | Horses              | 2018 | Head     | 13684     |  |  |
| Bhutan               | Mules               | 2018 | Head     | 4754      |  |  |
| Bhutan               | Pigs                | 2018 | Head     | 21810     |  |  |
| Bhutan               | Sheep               | 2018 | Head     | 9461      |  |  |
| Bolivia              | Asses               | 2018 | Head     | 634969    |  |  |
| Bolivia              | Beehives            | 2018 | No       | .         |  |  |
| Bolivia              | Camelids,other      | 2018 | Head     | 3075742   |  |  |
| Bolivia              | Cattle              | 2018 | Head     | 9556000   |  |  |
| Bolivia              | Chickens            | 2018 | 1000Head | 227468    |  |  |
| Bolivia              | Ducks               | 2018 | 1000Head | 676       |  |  |
| Bolivia              | Goats               | 2018 | Head     | 2228000   |  |  |
| Bolivia              | Horses              | 2018 | Head     | 506512    |  |  |
| Bolivia              | Mules               | 2018 | Head     | 82672     |  |  |
| Bolivia              | Pigs                | 2018 | Head     | 2998000   |  |  |
| Bolivia              | Rabbitsandhares     | 2018 | 1000Head | 281       |  |  |
| Bolivia              | Rodents,other       | 2018 | 1000Head | 426       |  |  |
| Bolivia              | Sheep               | 2018 | Head     | 7493000   |  |  |
| Bolivia              | Turkeys             | 2018 | 1000Head | 157       |  |  |
| BosniaandHerzegovina | Beehives            | 2018 | No       | 402630    |  |  |
| BosniaandHerzegovina | Cattle              | 2018 | Head     | 438006    |  |  |
| BosniaandHerzegovina | Chickens            | 2018 | 1000Head | 16229     |  |  |
| BosniaandHerzegovina | Ducks               | 2018 | 1000Head | 59        |  |  |
| BosniaandHerzegovina | Geeseandguineafowls | 2018 | 1000Head | 30        |  |  |
| BosniaandHerzegovina | Goats               | 2018 | Head     | 73038     |  |  |
| BosniaandHerzegovina | Horses              | 2018 | Head     | 14402     |  |  |
| BosniaandHerzegovina | Pigs                | 2018 | Head     | 541526    |  |  |
| BosniaandHerzegovina | Rabbitsandhares     | 2018 | 1000Head | 8         |  |  |
| BosniaandHerzegovina | Sheep               | 2018 | Head     | 1012546   |  |  |
| BosniaandHerzegovina | Turkeys             | 2018 | 1000Head | 106       |  |  |
| Botswana             | Asses               | 2018 | Head     | 172872    |  |  |
| Botswana             | Cattle              | 2018 | Head     | 1448180   |  |  |
| Botswana             | Chickens            | 2018 | 1000Head | 913       |  |  |
| Botswana             | Goats               | 2018 | Head     | 1327529   |  |  |
| Botswana             | Horses              | 2018 | Head     | 18166     |  |  |
| Botswana             | Mules               | 2018 | Head     | 3397      |  |  |
| Botswana             | Pigs                | 2018 | Head     | 4003      |  |  |
| Botswana             | Rabbitsandhares     | 2018 | 1000Head | 130       |  |  |
| Botswana             | Sheep               | 2018 | Head     | 223030    |  |  |
| Brazil               | Asses               | 2018 | Head     | 822255    |  |  |
| Brazil               | Beehives            | 2018 | No       | 1017506   |  |  |
| Brazil               | Buffaloes           | 2018 | Head     | 1390066   |  |  |
| Brazil               | Cattle              | 2018 | Head     | 213523056 |  |  |
| Brazil               | Chickens            | 2018 | 1000Head | 1468352   |  |  |
| Brazil               | Ducks               | 2018 | 1000Head | 3467      |  |  |
| Brazil               | Goats               | 2018 | Head     | 10696664  |  |  |
| Brazil               | Horses              | 2018 | Head     | 5751798   |  |  |
| Brazil               | Mules               | 2018 | Head     | 1252029   |  |  |
| Brazil               | Pigs                | 2018 | Head     | 41443594  |  |  |
| Brazil               | Rabbitsandhares     | 2018 | 1000Head | 166       |  |  |
| Brazil               | Sheep               | 2018 | Head     | 18948934  |  |  |
| Brazil               | Turkeys             | 2018 | 1000Head | 33781     |  |  |
| BritishVirginIslands | Asses               | 2018 | Head     | 300       |  |  |
| BritishVirginIslands | Cattle              | 2018 | Head     | 2400      |  |  |

|                      |                     |      |          |          |  |
|----------------------|---------------------|------|----------|----------|--|
| BritishVirginIslands | Goats               | 2018 | Head     | 10000    |  |
| BritishVirginIslands | Horses              | 2018 | Head     | 100      |  |
| BritishVirginIslands | Mules               | 2018 | Head     | 100      |  |
| BritishVirginIslands | Pigs                | 2018 | Head     | 1500     |  |
| BritishVirginIslands | Sheep               | 2018 | Head     | 6100     |  |
| BruneiDarussalam     | Buffaloes           | 2018 | Head     | 2319     |  |
| BruneiDarussalam     | Cattle              | 2018 | Head     | 681      |  |
| BruneiDarussalam     | Chickens            | 2018 | 1000Head | 16115    |  |
| BruneiDarussalam     | Ducks               | 2018 | 1000Head | 237      |  |
| BruneiDarussalam     | Goats               | 2018 | Head     | 6102     |  |
| BruneiDarussalam     | Pigs                | 2018 | Head     | 1236     |  |
| BruneiDarussalam     | Sheep               | 2018 | Head     | 4622     |  |
| Bulgaria             | Asses               | 2018 | Head     | 19000    |  |
| Bulgaria             | Beehives            | 2018 | No       | 765772   |  |
| Bulgaria             | Buffaloes           | 2018 | Head     | 12809    |  |
| Bulgaria             | Cattle              | 2018 | Head     | 540115   |  |
| Bulgaria             | Chickens            | 2018 | 1000Head | 12864    |  |
| Bulgaria             | Ducks               | 2018 | 1000Head | 1666     |  |
| Bulgaria             | Geeseandguineafowls | 2018 | 1000Head | 16       |  |
| Bulgaria             | Goats               | 2018 | Head     | 256967   |  |
| Bulgaria             | Horses              | 2018 | Head     | 62229    |  |
| Bulgaria             | Mules               | 2018 | Head     | 1411     |  |
| Bulgaria             | Pigs                | 2018 | Head     | 593154   |  |
| Bulgaria             | Rabbitsandhares     | 2018 | 1000Head | 215      |  |
| Bulgaria             | Sheep               | 2018 | Head     | 1316784  |  |
| Bulgaria             | Turkeys             | 2018 | 1000Head | 30       |  |
| BurkinaFaso          | Asses               | 2018 | Head     | 1230042  |  |
| BurkinaFaso          | Camels              | 2018 | Head     | 19762    |  |
| BurkinaFaso          | Cattle              | 2018 | Head     | 9788225  |  |
| BurkinaFaso          | Chickens            | 2018 | 1000Head | 42499    |  |
| BurkinaFaso          | Goats               | 2018 | Head     | 15586023 |  |
| BurkinaFaso          | Horses              | 2018 | Head     | 41687    |  |
| BurkinaFaso          | Pigs                | 2018 | Head     | 2537901  |  |
| BurkinaFaso          | Sheep               | 2018 | Head     | 10394652 |  |
| Burundi              | Beehives            | 2018 | No       | 217927   |  |
| Burundi              | Cattle              | 2018 | Head     | 1110936  |  |
| Burundi              | Chickens            | 2018 | 1000Head | 2850     |  |
| Burundi              | Goats               | 2018 | Head     | 3249827  |  |
| Burundi              | Pigs                | 2018 | Head     | 774689   |  |
| Burundi              | Rabbitsandhares     | 2018 | 1000Head | 515      |  |
| Burundi              | Sheep               | 2018 | Head     | 548608   |  |
| Burundi              | Turkeys             | 2018 | 1000Head | .        |  |
| CaboVerde            | Asses               | 2018 | Head     | 15989    |  |
| CaboVerde            | Cattle              | 2018 | Head     | 29558    |  |
| CaboVerde            | Chickens            | 2018 | 1000Head | 1000     |  |
| CaboVerde            | Goats               | 2018 | Head     | 107532   |  |
| CaboVerde            | Horses              | 2018 | Head     | 565      |  |
| CaboVerde            | Mules               | 2018 | Head     | 1901     |  |
| CaboVerde            | Pigs                | 2018 | Head     | 66808    |  |
| CaboVerde            | Sheep               | 2018 | Head     | 12620    |  |
| Cambodia             | Buffaloes           | 2018 | Head     | 651945   |  |
| Cambodia             | Cattle              | 2018 | Head     | 2855353  |  |
| Cambodia             | Chickens            | 2018 | 1000Head | 13200    |  |
| Cambodia             | Ducks               | 2018 | 1000Head | 8887     |  |
| Cambodia             | Horses              | 2018 | Head     | 30619    |  |
| Cambodia             | Pigs                | 2018 | Head     | 1760952  |  |

|                        |                     |      |          |          |  |
|------------------------|---------------------|------|----------|----------|--|
| Cameroon               | Asses               | 2018 | Head     | 39987    |  |
| Cameroon               | Beehives            | 2018 | No       | 317835   |  |
| Cameroon               | Cattle              | 2018 | Head     | 5737585  |  |
| Cameroon               | Chickens            | 2018 | 1000Head | 52718    |  |
| Cameroon               | Goats               | 2018 | Head     | 5484698  |  |
| Cameroon               | Horses              | 2018 | Head     | 20325    |  |
| Cameroon               | Pigs                | 2018 | Head     | 1963355  |  |
| Cameroon               | Rabbitsandhares     | 2018 | 1000Head | 49       |  |
| Cameroon               | Sheep               | 2018 | Head     | 3436274  |  |
| Canada                 | Beehives            | 2018 | No       | 695729   |  |
| Canada                 | Cattle              | 2018 | Head     | 11565000 |  |
| Canada                 | Chickens            | 2018 | 1000Head | 170585   |  |
| Canada                 | Ducks               | 2018 | 1000Head | 1497     |  |
| Canada                 | Geeseandguineafowls | 2018 | 1000Head | 324      |  |
| Canada                 | Goats               | 2018 | Head     | 30015    |  |
| Canada                 | Horses              | 2018 | Head     | 398365   |  |
| Canada                 | Mules               | 2018 | Head     | 4000     |  |
| Canada                 | Pigs                | 2018 | Head     | 14170000 |  |
| Canada                 | Sheep               | 2018 | Head     | 829400   |  |
| Canada                 | Turkeys             | 2018 | 1000Head | 5693     |  |
| CaymanIslands          | Cattle              | 2018 | Head     | 2124     |  |
| CaymanIslands          | Chickens            | 2018 | 1000Head | 6        |  |
| CaymanIslands          | Goats               | 2018 | Head     | 2459     |  |
| CaymanIslands          | Pigs                | 2018 | Head     | 1210     |  |
| CentralAfricanRepublic | Asses               | 2018 | Head     | .        |  |
| CentralAfricanRepublic | Beehives            | 2018 | No       | 1679762  |  |
| CentralAfricanRepublic | Cattle              | 2018 | Head     | 4679519  |  |
| CentralAfricanRepublic | Chickens            | 2018 | 1000Head | 7595     |  |
| CentralAfricanRepublic | Ducks               | 2018 | 1000Head | 13       |  |
| CentralAfricanRepublic | Goats               | 2018 | Head     | 6515860  |  |
| CentralAfricanRepublic | Pigs                | 2018 | Head     | 1113870  |  |
| CentralAfricanRepublic | Sheep               | 2018 | Head     | 446966   |  |
| Chad                   | Asses               | 2018 | Head     | 3080235  |  |
| Chad                   | Beehives            | 2018 | No       | 125004   |  |
| Chad                   | Camels              | 2018 | Head     | 7762545  |  |
| Chad                   | Cattle              | 2018 | Head     | 29063152 |  |
| Chad                   | Chickens            | 2018 | 1000Head | 6245     |  |
| Chad                   | Goats               | 2018 | Head     | 36524515 |  |
| Chad                   | Horses              | 2018 | Head     | 445366   |  |
| Chad                   | Pigs                | 2018 | Head     | 110000   |  |
| Chad                   | Sheep               | 2018 | Head     | 33215051 |  |
| Chile                  | Asses               | 2018 | Head     | 15386    |  |
| Chile                  | Beehives            | 2018 | No       | 447140   |  |
| Chile                  | Cattle              | 2018 | Head     | 2939902  |  |
| Chile                  | Chickens            | 2018 | 1000Head | 110258   |  |
| Chile                  | Goats               | 2018 | Head     | 448439   |  |
| Chile                  | Horses              | 2018 | Head     | 295600   |  |
| Chile                  | Mules               | 2018 | Head     | 7004     |  |
| Chile                  | Pigs                | 2018 | Head     | 2608205  |  |
| Chile                  | Sheep               | 2018 | Head     | 3198130  |  |
| Chile                  | Turkeys             | 2018 | 1000Head | 25830    |  |
| China                  | Asses               | 2018 | Head     | 2677800  |  |
| China                  | Beehives            | 2018 | No       | 9173742  |  |
| China                  | Buffaloes           | 2018 | Head     | 27118636 |  |
| China                  | Camels              | 2018 | Head     | 323300   |  |
| China                  | Cattle              | 2018 | Head     | 63417928 |  |

|                        |                     |      |          |           |  |
|------------------------|---------------------|------|----------|-----------|--|
| China                  | Chickens            | 2018 | 1000Head | 5372559   |  |
| China                  | Ducks               | 2018 | 1000Head | 692691    |  |
| China                  | Geeseandguineafowls | 2018 | 1000Head | 312277    |  |
| China                  | Goats               | 2018 | Head     | 138383129 |  |
| China                  | Horses              | 2018 | Head     | 3438788   |  |
| China                  | Mules               | 2018 | Head     | 811200    |  |
| China                  | Pigeons,otherbirds  | 2018 | 1000Head | 6924      |  |
| China                  | Pigs                | 2018 | Head     | 447175334 |  |
| China                  | Rabbitsandhares     | 2018 | 1000Head | 227792    |  |
| China                  | Sheep               | 2018 | Head     | 164079093 |  |
| China                  | Turkeys             | 2018 | 1000Head | 83        |  |
| Hongkong               | Buffaloes           | 2018 | Head     | 329       |  |
| Hongkong               | Cattle              | 2018 | Head     | 1583      |  |
| Hongkong               | Chickens            | 2018 | 1000Head | 1303      |  |
| Hongkong               | Ducks               | 2018 | 1000Head | 237       |  |
| Hongkong               | Geeseandguineafowls | 2018 | 1000Head | 0         |  |
| Hongkong               | Goats               | 2018 | Head     | 696       |  |
| Hongkong               | Horses              | 2018 | Head     | 1531      |  |
| Hongkong               | Pigeons,otherbirds  | 2018 | 1000Head | 6924      |  |
| Hongkong               | Pigs                | 2018 | Head     | 153458    |  |
| Hongkong               | Sheep               | 2018 | Head     | 21        |  |
| Hongkong               | Turkeys             | 2018 | 1000Head | 0         |  |
| China,MacaoSAR         | Chickens            | 2018 | 1000Head | 780       |  |
| China,mainland         | Asses               | 2018 | Head     | 2677800   |  |
| China,mainland         | Beehives            | 2018 | No       | 9048546   |  |
| China,mainland         | Buffaloes           | 2018 | Head     | 27116250  |  |
| China,mainland         | Camels              | 2018 | Head     | 323300    |  |
| China,mainland         | Cattle              | 2018 | Head     | 63271250  |  |
| China,mainland         | Chickens            | 2018 | 1000Head | 5274475   |  |
| China,mainland         | Ducks               | 2018 | 1000Head | 684529    |  |
| China,mainland         | Geeseandguineafowls | 2018 | 1000Head | 311415    |  |
| China,mainland         | Goats               | 2018 | Head     | 138237700 |  |
| China,mainland         | Horses              | 2018 | Head     | 3436400   |  |
| China,mainland         | Mules               | 2018 | Head     | 811200    |  |
| China,mainland         | Pigs                | 2018 | Head     | 441589200 |  |
| China,mainland         | Rabbitsandhares     | 2018 | 1000Head | 227731    |  |
| China,mainland         | Sheep               | 2018 | Head     | 164078900 |  |
| China,TaiwanProvinceof | Beehives            | 2018 | No       | 125196    |  |
| China,TaiwanProvinceof | Buffaloes           | 2018 | Head     | 2057      |  |
| China,TaiwanProvinceof | Cattle              | 2018 | Head     | 145095    |  |
| China,TaiwanProvinceof | Chickens            | 2018 | 1000Head | 96001     |  |
| China,TaiwanProvinceof | Ducks               | 2018 | 1000Head | 7925      |  |
| China,TaiwanProvinceof | Geeseandguineafowls | 2018 | 1000Head | 862       |  |
| China,TaiwanProvinceof | Goats               | 2018 | Head     | 144733    |  |
| China,TaiwanProvinceof | Horses              | 2018 | Head     | 857       |  |
| China,TaiwanProvinceof | Pigs                | 2018 | Head     | 5432676   |  |
| China,TaiwanProvinceof | Rabbitsandhares     | 2018 | 1000Head | 61        |  |
| China,TaiwanProvinceof | Sheep               | 2018 | Head     | 172       |  |
| China,TaiwanProvinceof | Turkeys             | 2018 | 1000Head | 83        |  |
| Colombia               | Asses               | 2018 | Head     | 97545     |  |
| Colombia               | Beehives            | 2018 | No       | 112699    |  |
| Colombia               | Cattle              | 2018 | Head     | 25557340  |  |
| Colombia               | Chickens            | 2018 | 1000Head | 158783    |  |
| Colombia               | Goats               | 2018 | Head     | 970668    |  |
| Colombia               | Horses              | 2018 | Head     | 928095    |  |
| Colombia               | Mules               | 2018 | Head     | 222023    |  |

|             |                     |      |          |          |       |
|-------------|---------------------|------|----------|----------|-------|
| Colombia    | Pigs                | 2018 | Head     | 5373445  |       |
| Colombia    | Rabbitsandhares     |      | 2018     | 1000Head | 545   |
| Colombia    | Sheep               | 2018 | Head     | 913051   |       |
| Comoros     | Asses               | 2018 | Head     | 5511     |       |
| Comoros     | Cattle              | 2018 | Head     | 50797    |       |
| Comoros     | Chickens            | 2018 | 1000Head |          | 549   |
| Comoros     | Goats               | 2018 | Head     | 121034   |       |
| Comoros     | Sheep               | 2018 | Head     | 24815    |       |
| Congo       | Cattle              | 2018 | Head     | 364343   |       |
| Congo       | Chickens            | 2018 | 1000Head |          | 2966  |
| Congo       | Goats               | 2018 | Head     | 326525   |       |
| Congo       | Horses              | 2018 | Head     | 80       |       |
| Congo       | Pigs                | 2018 | Head     | 109349   |       |
| Congo       | Sheep               | 2018 | Head     | 129741   |       |
| CookIslands | Beehives            | 2018 | No       | 46       |       |
| CookIslands | Cattle              | 2018 | Head     | 112      |       |
| CookIslands | Chickens            | 2018 | 1000Head |          | 18    |
| CookIslands | Ducks               | 2018 | 1000Head |          | .     |
| CookIslands | Goats               | 2018 | Head     | 877      |       |
| CookIslands | Horses              | 2018 | Head     | 302      |       |
| CookIslands | Pigs                | 2018 | Head     | 31898    |       |
| CostaRica   | Asses               | 2018 | Head     | 8272     |       |
| CostaRica   | Beehives            | 2018 | No       | 39376    |       |
| CostaRica   | Cattle              | 2018 | Head     | 1445782  |       |
| CostaRica   | Chickens            | 2018 | 1000Head |          | 25829 |
| CostaRica   | Goats               | 2018 | Head     | 5785     |       |
| CostaRica   | Horses              | 2018 | Head     | 128693   |       |
| CostaRica   | Mules               | 2018 | Head     | 5367     |       |
| CostaRica   | Pigs                | 2018 | Head     | 492125   |       |
| CostaRica   | Sheep               | 2018 | Head     | 2819     |       |
| IvoryCoast  | Cattle              | 2018 | Head     | 1669694  |       |
| IvoryCoast  | Chickens            | 2018 | 1000Head |          | 59127 |
| IvoryCoast  | Ducks               | 2018 | 1000Head |          | .     |
| IvoryCoast  | Goats               | 2018 | Head     | 1481319  |       |
| IvoryCoast  | Pigs                | 2018 | Head     | 344429   |       |
| IvoryCoast  | Sheep               | 2018 | Head     | 1867482  |       |
| Croatia     | Asses               | 2018 | Head     | 2047     |       |
| Croatia     | Beehives            | 2018 | No       | 488969   |       |
| Croatia     | Cattle              | 2018 | Head     | 414125   |       |
| Croatia     | Chickens            | 2018 | 1000Head |          | 10881 |
| Croatia     | Ducks               | 2018 | 1000Head | 56       |       |
| Croatia     | Geeseandguineafowls |      | 2018     | 1000Head | 16    |
| Croatia     | Goats               | 2018 | Head     | 80064    |       |
| Croatia     | Horses              | 2018 | Head     | 23898    |       |
| Croatia     | Pigs                | 2018 | Head     | 1049123  |       |
| Croatia     | Sheep               | 2018 | Head     | 636294   |       |
| Croatia     | Turkeys             | 2018 | 1000Head |          | 442   |
| Cuba        | Asses               | 2018 | Head     | 17400    |       |
| Cuba        | Beehives            | 2018 | No       | 191500   |       |
| Cuba        | Cattle              | 2018 | Head     | 3808400  |       |
| Cuba        | Chickens            | 2018 | 1000Head |          | 25614 |
| Cuba        | Goats               | 2018 | Head     | 1185000  |       |
| Cuba        | Horses              | 2018 | Head     | 915800   |       |
| Cuba        | Mules               | 2018 | Head     | 21700    |       |
| Cuba        | Pigs                | 2018 | Head     | 2289100  |       |
| Cuba        | Sheep               | 2018 | Head     | 1471800  |       |

|          |                                   |      |          |          |  |  |
|----------|-----------------------------------|------|----------|----------|--|--|
| Cyprus   | Asses                             | 2018 | Head     | 5200     |  |  |
| Cyprus   | Beehives                          | 2018 | No       | 51219    |  |  |
| Cyprus   | Cattle                            | 2018 | Head     | 70821    |  |  |
| Cyprus   | Chickens                          | 2018 | 1000Head | 2949     |  |  |
| Cyprus   | Ducks                             | 2018 | 1000Head | 5        |  |  |
| Cyprus   | Geeseandguinea <span>fowls</span> | 2018 | 1000Head | 0        |  |  |
| Cyprus   | Goats                             | 2018 | Head     | 266593   |  |  |
| Cyprus   | Horses                            | 2018 | Head     | 663      |  |  |
| Cyprus   | Mules                             | 2018 | Head     | 1500     |  |  |
| Cyprus   | Pigeons,other <span>birds</span>  | 2018 | 1000Head | 562      |  |  |
| Cyprus   | Pigs                              | 2018 | Head     | 347671   |  |  |
| Cyprus   | Rabbitsand <span>hares</span>     | 2018 | 1000Head | 82       |  |  |
| Cyprus   | Sheep                             | 2018 | Head     | 330229   |  |  |
| Cyprus   | Turkeys                           | 2018 | 1000Head | 88       |  |  |
| Czechia  | Beehives                          | 2018 | No       | 631811   |  |  |
| Czechia  | Cattle                            | 2018 | Head     | 1415770  |  |  |
| Czechia  | Chickens                          | 2018 | 1000Head | 22428    |  |  |
| Czechia  | Ducks                             | 2018 | 1000Head | 781      |  |  |
| Czechia  | Geeseandguinea <span>fowls</span> | 2018 | 1000Head | 20       |  |  |
| Czechia  | Goats                             | 2018 | Head     | 30316    |  |  |
| Czechia  | Horses                            | 2018 | Head     | 35181    |  |  |
| Czechia  | Pigs                              | 2018 | Head     | 1557218  |  |  |
| Czechia  | Sheep                             | 2018 | Head     | 218915   |  |  |
| Czechia  | Turkeys                           | 2018 | 1000Head | 344      |  |  |
| NKorea   | Cattle                            | 2018 | Head     | 570231   |  |  |
| NKorea   | Chickens                          | 2018 | 1000Head | 15647    |  |  |
| NKorea   | Ducks                             | 2018 | 1000Head | 7167     |  |  |
| NKorea   | Goats                             | 2018 | Head     | 3699789  |  |  |
| NKorea   | Horses                            | 2018 | Head     | 48252    |  |  |
| NKorea   | Pigs                              | 2018 | Head     | 2611312  |  |  |
| NKorea   | Rabbitsand <span>hares</span>     | 2018 | 1000Head | 32250    |  |  |
| NKorea   | Sheep                             | 2018 | Head     | 160789   |  |  |
| congo    | Asses                             | 2018 | Head     | .        |  |  |
| congo    | Cattle                            | 2018 | Head     | 1037536  |  |  |
| congo    | Chickens                          | 2018 | 1000Head | 19374    |  |  |
| congo    | Goats                             | 2018 | Head     | 4065709  |  |  |
| congo    | Horses                            | 2018 | Head     | .        |  |  |
| congo    | Pigs                              | 2018 | Head     | 986904   |  |  |
| congo    | Sheep                             | 2018 | Head     | 899191   |  |  |
| Denmark  | Cattle                            | 2018 | Head     | 1540446  |  |  |
| Denmark  | Chickens                          | 2018 | 1000Head | 19351    |  |  |
| Denmark  | Ducks                             | 2018 | 1000Head | 166      |  |  |
| Denmark  | Geeseandguinea <span>fowls</span> | 2018 | 1000Head | 4        |  |  |
| Denmark  | Horses                            | 2018 | Head     | 45996    |  |  |
| Denmark  | Pigs                              | 2018 | Head     | 12781247 |  |  |
| Denmark  | Sheep                             | 2018 | Head     | 143797   |  |  |
| Denmark  | Turkeys                           | 2018 | 1000Head | 500      |  |  |
| Djibouti | Asses                             | 2018 | Head     | 8376     |  |  |
| Djibouti | Camels                            | 2018 | Head     | 70978    |  |  |
| Djibouti | Cattle                            | 2018 | Head     | 300870   |  |  |
| Djibouti | Goats                             | 2018 | Head     | 514664   |  |  |
| Djibouti | Sheep                             | 2018 | Head     | 469095   |  |  |
| Dominica | Cattle                            | 2018 | Head     | 14071    |  |  |
| Dominica | Chickens                          | 2018 | 1000Head | 199      |  |  |
| Dominica | Goats                             | 2018 | Head     | 9703     |  |  |
| Dominica | Pigs                              | 2018 | Head     | 5063     |  |  |



|                  |                                   |      |          |         |  |
|------------------|-----------------------------------|------|----------|---------|--|
| Dominica         | Sheep                             | 2018 | Head     | 7990    |  |
| DominicR         | Asses                             | 2018 | Head     | 156174  |  |
| DominicR         | Beehives                          | 2018 | No       | 94583   |  |
| DominicR         | Cattle                            | 2018 | Head     | 3011854 |  |
| DominicR         | Chickens                          | 2018 | 1000Head | 185795  |  |
| DominicR         | Goats                             | 2018 | Head     | 222991  |  |
| DominicR         | Horses                            | 2018 | Head     | 359616  |  |
| DominicR         | Mules                             | 2018 | Head     | 145367  |  |
| DominicR         | Pigs                              | 2018 | Head     | 620624  |  |
| DominicR         | Sheep                             | 2018 | Head     | 251481  |  |
| Ecuador          | Asses                             | 2018 | Head     | 47035   |  |
| Ecuador          | Beehives                          | 2018 | No       | 48195   |  |
| Ecuador          | Cattle                            | 2018 | Head     | 4056796 |  |
| Ecuador          | Chickens                          | 2018 | 1000Head | 165521  |  |
| Ecuador          | Ducks                             | 2018 | 1000Head | 492     |  |
| Ecuador          | Geeseandguinea <span>fowls</span> | 2018 | 1000Head | 47      |  |
| Ecuador          | Goats                             | 2018 | Head     | 21745   |  |
| Ecuador          | Horses                            | 2018 | Head     | 192833  |  |
| Ecuador          | Mules                             | 2018 | Head     | 73681   |  |
| Ecuador          | Pigs                              | 2018 | Head     | 1283338 |  |
| Ecuador          | Rabbitsand <span>hares</span>     | 2018 | 1000Head | 452     |  |
| Ecuador          | Sheep                             | 2018 | Head     | 355897  |  |
| Ecuador          | Turkeys                           | 2018 | 1000Head | 221     |  |
| Egypt            | Asses                             | 2018 | Head     | 1338450 |  |
| Egypt            | Beehives                          | 2018 | No       | 795942  |  |
| Egypt            | Buffaloes                         | 2018 | Head     | 3506061 |  |
| Egypt            | Camels                            | 2018 | Head     | 148060  |  |
| Egypt            | Cattle                            | 2018 | Head     | 4516584 |  |
| Egypt            | Chickens                          | 2018 | 1000Head | 146196  |  |
| Egypt            | Ducks                             | 2018 | 1000Head | 11229   |  |
| Egypt            | Geeseandguinea <span>fowls</span> | 2018 | 1000Head | 7123    |  |
| Egypt            | Goats                             | 2018 | Head     | 4063208 |  |
| Egypt            | Horses                            | 2018 | Head     | 78896   |  |
| Egypt            | Mules                             | 2018 | Head     | 2959    |  |
| Egypt            | Pigeons,other <span>birds</span>  | 2018 | 1000Head | 11300   |  |
| Egypt            | Pigs                              | 2018 | Head     | 9733    |  |
| Egypt            | Rabbitsand <span>hares</span>     | 2018 | 1000Head | 6500    |  |
| Egypt            | Sheep                             | 2018 | Head     | 5552849 |  |
| Egypt            | Turkeys                           | 2018 | 1000Head | 3350    |  |
| ElSalvador       | Asses                             | 2018 | Head     | 3266    |  |
| ElSalvador       | Beehives                          | 2018 | No       | 217041  |  |
| ElSalvador       | Cattle                            | 2018 | Head     | 881372  |  |
| ElSalvador       | Chickens                          | 2018 | 1000Head | 17556   |  |
| ElSalvador       | Goats                             | 2018 | Head     | 14218   |  |
| ElSalvador       | Horses                            | 2018 | Head     | 97957   |  |
| ElSalvador       | Mules                             | 2018 | Head     | 24103   |  |
| ElSalvador       | Pigs                              | 2018 | Head     | 269279  |  |
| ElSalvador       | Sheep                             | 2018 | Head     | 5319    |  |
| EquatorialGuinea | Cattle                            | 2018 | Head     | 5397    |  |
| EquatorialGuinea | Chickens                          | 2018 | 1000Head | 377     |  |
| EquatorialGuinea | Ducks                             | 2018 | 1000Head | 37      |  |
| EquatorialGuinea | Goats                             | 2018 | Head     | 9639    |  |
| EquatorialGuinea | Pigs                              | 2018 | Head     | 6951    |  |
| EquatorialGuinea | Sheep                             | 2018 | Head     | 40617   |  |
| Eritrea          | Camels                            | 2018 | Head     | 378140  |  |
| Eritrea          | Cattle                            | 2018 | Head     | 2129963 |  |

|                                          |                                   |      |          |          |  |
|------------------------------------------|-----------------------------------|------|----------|----------|--|
| Eritrea                                  | Chickens                          | 2018 | 1000Head | 1185     |  |
| Eritrea                                  | Goats                             | 2018 | Head     | 1812963  |  |
| Eritrea                                  | Sheep                             | 2018 | Head     | 2432034  |  |
| Estonia                                  | Beehives                          | 2018 | No       | 48700    |  |
| Estonia                                  | Cattle                            | 2018 | Head     | 251900   |  |
| Estonia                                  | Chickens                          | 2018 | 1000Head | 2059     |  |
| Estonia                                  | Ducks                             | 2018 | 1000Head | 9        |  |
| Estonia                                  | Geeseandguinea <span>fowls</span> | 2018 | 1000Head | 9        |  |
| Estonia                                  | Goats                             | 2018 | Head     | 5200     |  |
| Estonia                                  | Horses                            | 2018 | Head     | 5700     |  |
| Estonia                                  | Pigs                              | 2018 | Head     | 290400   |  |
| Estonia                                  | Rabbitsand <span>hares</span>     | 2018 | 1000Head | 41       |  |
| Estonia                                  | Sheep                             | 2018 | Head     | 73100    |  |
| Estonia                                  | Turkeys                           | 2018 | 1000Head | 10       |  |
| Eswatini                                 | Asses                             | 2018 | Head     | 16395    |  |
| Eswatini                                 | Cattle                            | 2018 | Head     | 615902   |  |
| Eswatini                                 | Chickens                          | 2018 | 1000Head | 3813     |  |
| Eswatini                                 | Goats                             | 2018 | Head     | 245989   |  |
| Eswatini                                 | Horses                            | 2018 | Head     | 1710     |  |
| Eswatini                                 | Mules                             | 2018 | Head     | 109      |  |
| Eswatini                                 | Pigs                              | 2018 | Head     | 35642    |  |
| Eswatini                                 | Sheep                             | 2018 | Head     | 39544    |  |
| Ethiopia                                 | Asses                             | 2018 | Head     | 8542747  |  |
| Ethiopia                                 | Beehives                          | 2018 | No       | 6018223  |  |
| Ethiopia                                 | Camels                            | 2018 | Head     | 1261785  |  |
| Ethiopia                                 | Cattle                            | 2018 | Head     | 62599736 |  |
| Ethiopia                                 | Chickens                          | 2018 | 1000Head | 61482    |  |
| Ethiopia                                 | Goats                             | 2018 | Head     | 33048456 |  |
| Ethiopia                                 | Horses                            | 2018 | Head     | 2296170  |  |
| Ethiopia                                 | Mules                             | 2018 | Head     | 340358   |  |
| Ethiopia                                 | Pigs                              | 2018 | Head     | 35950    |  |
| Ethiopia                                 | Sheep                             | 2018 | Head     | 31688157 |  |
| Falkland <span>Islands</span> (Malvinas) | Cattle                            | 2018 | Head     | 4194     |  |
| Falkland <span>Islands</span> (Malvinas) | Chickens                          | 2018 | 1000Head | 4        |  |
| Falkland <span>Islands</span> (Malvinas) | Horses                            | 2018 | Head     | 1191     |  |
| Falkland <span>Islands</span> (Malvinas) | Pigs                              | 2018 | Head     | 46       |  |
| Falkland <span>Islands</span> (Malvinas) | Sheep                             | 2018 | Head     | 699397   |  |
| Faroe <span>Islands</span>               | Cattle                            | 2018 | Head     | 1816     |  |
| Faroe <span>Islands</span>               | Sheep                             | 2018 | Head     | 70616    |  |
| Fiji                                     | Beehives                          | 2018 | No       | 9625     |  |
| Fiji                                     | Cattle                            | 2018 | Head     | 53019    |  |
| Fiji                                     | Chickens                          | 2018 | 1000Head | 5377     |  |
| Fiji                                     | Ducks                             | 2018 | 1000Head | 110      |  |
| Fiji                                     | Goats                             | 2018 | Head     | 263123   |  |
| Fiji                                     | Horses                            | 2018 | Head     | 47536    |  |
| Fiji                                     | Pigs                              | 2018 | Head     | 154596   |  |
| Fiji                                     | Sheep                             | 2018 | Head     | 27697    |  |
| Fiji                                     | Turkeys                           | 2018 | 1000Head | 80       |  |
| Finland                                  | Beehives                          | 2018 | No       | 72300    |  |
| Finland                                  | Cattle                            | 2018 | Head     | 882277   |  |
| Finland                                  | Chickens                          | 2018 | 1000Head | 8781     |  |
| Finland                                  | Ducks                             | 2018 | 1000Head | .        |  |
| Finland                                  | Goats                             | 2018 | Head     | 5437     |  |
| Finland                                  | Horses                            | 2018 | Head     | 74400    |  |
| Finland                                  | Pigs                              | 2018 | Head     | 1088988  |  |
| Finland                                  | Sheep                             | 2018 | Head     | 154999   |  |

|                 |                      |      |          |          |      |
|-----------------|----------------------|------|----------|----------|------|
| Finland         | Turkeys              | 2018 | 1000Head | 299      |      |
| France          | Asses                | 2018 | Head     | 30460    |      |
| France          | Beehives             | 2018 | No       | 868365   |      |
| France          | Cattle               | 2018 | Head     | 18547082 |      |
| France          | Chickens             | 2018 | 1000Head | 165736   |      |
| France          | Ducks                | 2018 | 1000Head | 23976    |      |
| France          | Geeseandguineaafowls | 2018 | 1000Head |          | 337  |
| France          | Goats                | 2018 | Head     | 1298656  |      |
| France          | Horses               | 2018 | Head     | 370881   |      |
| France          | Mules                | 2018 | Head     | 27988    |      |
| France          | Pigeons,otherbirds   | 2018 | 1000Head |          | 1775 |
| France          | Pigs                 | 2018 | Head     | 13324723 |      |
| France          | Rabbitsandhares      | 2018 | 1000Head |          | 714  |
| France          | Sheep                | 2018 | Head     | 7042206  |      |
| France          | Turkeys              | 2018 | 1000Head | 18830    |      |
| FrenchGuyana    | Cattle               | 2018 | Head     | 18191    |      |
| FrenchGuyana    | Chickens             | 2018 | 1000Head |          | 107  |
| FrenchGuyana    | Ducks                | 2018 | 1000Head | 32       |      |
| FrenchGuyana    | Goats                | 2018 | Head     | 1689     |      |
| FrenchGuyana    | Horses               | 2018 | Head     | 900      |      |
| FrenchGuyana    | Pigs                 | 2018 | Head     | 4985     |      |
| FrenchGuyana    | Sheep                | 2018 | Head     | 1089     |      |
| FrenchPolynesia | Beehives             | 2018 | No       | 1825     |      |
| FrenchPolynesia | Cattle               | 2018 | Head     | 7340     |      |
| FrenchPolynesia | Chickens             | 2018 | 1000Head |          | 324  |
| FrenchPolynesia | Ducks                | 2018 | 1000Head | 30       |      |
| FrenchPolynesia | Goats                | 2018 | Head     | 16782    |      |
| FrenchPolynesia | Horses               | 2018 | Head     | 2200     |      |
| FrenchPolynesia | Pigs                 | 2018 | Head     | 29640    |      |
| FrenchPolynesia | Rabbitsandhares      | 2018 | 1000Head |          | .    |
| FrenchPolynesia | Sheep                | 2018 | Head     | 442      |      |
| Gabon           | Cattle               | 2018 | Head     | 38145    |      |
| Gabon           | Chickens             | 2018 | 1000Head | 3185     |      |
| Gabon           | Goats                | 2018 | Head     | 111650   |      |
| Gabon           | Pigs                 | 2018 | Head     | 222636   |      |
| Gabon           | Rabbitsandhares      | 2018 | 1000Head |          | 339  |
| Gabon           | Sheep                | 2018 | Head     | 218782   |      |
| Gambia          | Asses                | 2018 | Head     | 63781    |      |
| Gambia          | Cattle               | 2018 | Head     | 464283   |      |
| Gambia          | Chickens             | 2018 | 1000Head | 1387     |      |
| Gambia          | Goats                | 2018 | Head     | 342767   |      |
| Gambia          | Horses               | 2018 | Head     | 6008     |      |
| Gambia          | Pigs                 | 2018 | Head     | 14571    |      |
| Gambia          | Sheep                | 2018 | Head     | 72611    |      |
| Georgia         | Asses                | 2018 | Head     | 10144    |      |
| Georgia         | Beehives             | 2018 | No       | 240600   |      |
| Georgia         | Buffaloes            | 2018 | Head     | 18361    |      |
| Georgia         | Cattle               | 2018 | Head     | 909700   |      |
| Georgia         | Chickens             | 2018 | 1000Head | 8220     |      |
| Georgia         | Goats                | 2018 | Head     | 51100    |      |
| Georgia         | Horses               | 2018 | Head     | 39252    |      |
| Georgia         | Mules                | 2018 | Head     | 94       |      |
| Georgia         | Pigs                 | 2018 | Head     | 150700   |      |
| Georgia         | Rabbitsandhares      | 2018 | 1000Head |          | 16   |
| Georgia         | Sheep                | 2018 | Head     | 855900   |      |
| Georgia         | Turkeys              | 2018 | 1000Head | 425      |      |

|            |                     |      |          |          |  |
|------------|---------------------|------|----------|----------|--|
| Germany    | Beehives            | 2018 | No       | 677014   |  |
| Germany    | Buffaloes           | 2018 | Head     | 9613     |  |
| Germany    | Cattle              | 2018 | Head     | 11949092 |  |
| Germany    | Chickens            | 2018 | 1000Head | 157813   |  |
| Germany    | Ducks               | 2018 | 1000Head | 2811     |  |
| Germany    | Geeseandguineafowls | 2018 | 1000Head | 306      |  |
| Germany    | Goats               | 2018 | Head     | 146000   |  |
| Germany    | Horses              | 2018 | Head     | 406269   |  |
| Germany    | Pigs                | 2018 | Head     | 26445400 |  |
| Germany    | Rabbitsandhares     | 2018 | 1000Head | 57       |  |
| Germany    | Sheep               | 2018 | Head     | 1569900  |  |
| Germany    | Turkeys             | 2018 | 1000Head | 13399    |  |
| Ghana      | Asses               | 2018 | Head     | 14910    |  |
| Ghana      | Cattle              | 2018 | Head     | 1879009  |  |
| Ghana      | Chickens            | 2018 | 1000Head | 60150    |  |
| Ghana      | Goats               | 2018 | Head     | 6720530  |  |
| Ghana      | Horses              | 2018 | Head     | 2930     |  |
| Ghana      | Pigs                | 2018 | Head     | 744658   |  |
| Ghana      | Sheep               | 2018 | Head     | 4886604  |  |
| Greece     | Asses               | 2018 | Head     | 8547     |  |
| Greece     | Beehives            | 2018 | No       | 1556404  |  |
| Greece     | Buffaloes           | 2018 | Head     | 9239     |  |
| Greece     | Cattle              | 2018 | Head     | 612961   |  |
| Greece     | Chickens            | 2018 | 1000Head | 38163    |  |
| Greece     | Ducks               | 2018 | 1000Head | 36       |  |
| Greece     | Geeseandguineafowls | 2018 | 1000Head | 23       |  |
| Greece     | Goats               | 2018 | Head     | 3997519  |  |
| Greece     | Horses              | 2018 | Head     | 21668    |  |
| Greece     | Mules               | 2018 | Head     | 13334    |  |
| Greece     | Pigeons,otherbirds  | 2018 | 1000Head | 979      |  |
| Greece     | Pigs                | 2018 | Head     | 710488   |  |
| Greece     | Rabbitsandhares     | 2018 | 1000Head | 843      |  |
| Greece     | Sheep               | 2018 | Head     | 8834259  |  |
| Greece     | Turkeys             | 2018 | 1000Head | 91       |  |
| Greenland  | Beehives            | 2018 | No       | 15       |  |
| Greenland  | Cattle              | 2018 | Head     | 165      |  |
| Greenland  | Horses              | 2018 | Head     | 142      |  |
| Greenland  | Sheep               | 2018 | Head     | 18083    |  |
| Grenada    | Asses               | 2018 | Head     | 660      |  |
| Grenada    | Cattle              | 2018 | Head     | 4563     |  |
| Grenada    | Chickens            | 2018 | 1000Head | 276      |  |
| Grenada    | Goats               | 2018 | Head     | 7091     |  |
| Grenada    | Horses              | 2018 | Head     | 30       |  |
| Grenada    | Mules               | 2018 | Head     | 50       |  |
| Grenada    | Pigs                | 2018 | Head     | 2847     |  |
| Grenada    | Sheep               | 2018 | Head     | 13658    |  |
| Guadeloupe | Asses               | 2018 | Head     | 167      |  |
| Guadeloupe | Beehives            | 2018 | No       | 875      |  |
| Guadeloupe | Cattle              | 2018 | Head     | 77205    |  |
| Guadeloupe | Chickens            | 2018 | 1000Head | 293      |  |
| Guadeloupe | Ducks               | 2018 | 1000Head | 5        |  |
| Guadeloupe | Goats               | 2018 | Head     | 13819    |  |
| Guadeloupe | Horses              | 2018 | Head     | 64       |  |
| Guadeloupe | Mules               | 2018 | Head     | 139      |  |
| Guadeloupe | Pigs                | 2018 | Head     | 15396    |  |
| Guadeloupe | Rabbitsandhares     | 2018 | 1000Head | 19       |  |

|               |                      |      |          |         |  |
|---------------|----------------------|------|----------|---------|--|
| Guadeloupe    | Sheep                | 2018 | Head     | 1340    |  |
| Guadeloupe    | Turkeys              | 2018 | 1000Head | 13      |  |
| Guam          | Beehives             | 2018 | No       | 318     |  |
| Guam          | Buffaloes            | 2018 | Head     | 94      |  |
| Guam          | Cattle               | 2018 | Head     | 157     |  |
| Guam          | Chickens             | 2018 | 1000Head | 294     |  |
| Guam          | Goats                | 2018 | Head     | 867     |  |
| Guam          | Horses               | 2018 | Head     | 50      |  |
| Guam          | Pigs                 | 2018 | Head     | 5626    |  |
| Guatemala     | Asses                | 2018 | Head     | 10019   |  |
| Guatemala     | Beehives             | 2018 | No       | 92725   |  |
| Guatemala     | Cattle               | 2018 | Head     | 3899989 |  |
| Guatemala     | Chickens             | 2018 | 1000Head | 36580   |  |
| Guatemala     | Goats                | 2018 | Head     | 114131  |  |
| Guatemala     | Horses               | 2018 | Head     | 132792  |  |
| Guatemala     | Mules                | 2018 | Head     | 38949   |  |
| Guatemala     | Pigs                 | 2018 | Head     | 2966799 |  |
| Guatemala     | Sheep                | 2018 | Head     | 595653  |  |
| Guinea        | Asses                | 2018 | Head     | 2334    |  |
| Guinea        | Beehives             | 2018 | No       | 65056   |  |
| Guinea        | Cattle               | 2018 | Head     | 7520274 |  |
| Guinea        | Chickens             | 2018 | 1000Head | 25802   |  |
| Guinea        | Goats                | 2018 | Head     | 3248532 |  |
| Guinea        | Horses               | 2018 | Head     | 3491    |  |
| Guinea        | Pigs                 | 2018 | Head     | 140026  |  |
| Guinea        | Sheep                | 2018 | Head     | 2708364 |  |
| Guinea-Bissau | Asses                | 2018 | Head     | 5252    |  |
| Guinea-Bissau | Beehives             | 2018 | No       | 6806    |  |
| Guinea-Bissau | Cattle               | 2018 | Head     | 733686  |  |
| Guinea-Bissau | Chickens             | 2018 | 1000Head | 2086    |  |
| Guinea-Bissau | Goats                | 2018 | Head     | 826342  |  |
| Guinea-Bissau | Horses               | 2018 | Head     | 2515    |  |
| Guinea-Bissau | Pigs                 | 2018 | Head     | 463787  |  |
| Guinea-Bissau | Sheep                | 2018 | Head     | 505195  |  |
| Guyana        | Asses                | 2018 | Head     | 1019    |  |
| Guyana        | Beehives             | 2018 | No       | 4335    |  |
| Guyana        | Cattle               | 2018 | Head     | 99254   |  |
| Guyana        | Chickens             | 2018 | 1000Head | 28863   |  |
| Guyana        | Goats                | 2018 | Head     | 82742   |  |
| Guyana        | Horses               | 2018 | Head     | 2422    |  |
| Guyana        | Mules                | 2018 | Head     | 159     |  |
| Guyana        | Pigs                 | 2018 | Head     | 10380   |  |
| Guyana        | Sheep                | 2018 | Head     | 131770  |  |
| Haiti         | Asses                | 2018 | Head     | 209999  |  |
| Haiti         | Beehives             | 2018 | No       | 27186   |  |
| Haiti         | Cattle               | 2018 | Head     | 1508382 |  |
| Haiti         | Chickens             | 2018 | 1000Head | 5815    |  |
| Haiti         | Ducks                | 2018 | 1000Head | 192     |  |
| Haiti         | Geeseandguineaafowls | 2018 | 1000Head | 40      |  |
| Haiti         | Goats                | 2018 | Head     | 1988709 |  |
| Haiti         | Horses               | 2018 | Head     | 503843  |  |
| Haiti         | Mules                | 2018 | Head     | 79864   |  |
| Haiti         | Pigs                 | 2018 | Head     | 1042299 |  |
| Haiti         | Sheep                | 2018 | Head     | 157912  |  |
| Haiti         | Turkeys              | 2018 | 1000Head | 195     |  |
| Honduras      | Asses                | 2018 | Head     | 23303   |  |

|           |                     |      |          |           |  |
|-----------|---------------------|------|----------|-----------|--|
| Honduras  | Beehives            | 2018 | No       | 9805      |  |
| Honduras  | Cattle              | 2018 | Head     | 2875477   |  |
| Honduras  | Chickens            | 2018 | 1000Head | 46686     |  |
| Honduras  | Goats               | 2018 | Head     | 25415     |  |
| Honduras  | Horses              | 2018 | Head     | 181252    |  |
| Honduras  | Mules               | 2018 | Head     | 70165     |  |
| Honduras  | Pigs                | 2018 | Head     | 461135    |  |
| Honduras  | Sheep               | 2018 | Head     | 16614     |  |
| Hungary   | Asses               | 2018 | Head     | 4000      |  |
| Hungary   | Beehives            | 2018 | No       | 844000    |  |
| Hungary   | Cattle              | 2018 | Head     | 870000    |  |
| Hungary   | Chickens            | 2018 | 1000Head | 31844     |  |
| Hungary   | Ducks               | 2018 | 1000Head | 4695      |  |
| Hungary   | Geeseandguineafowls | 2018 | 1000Head | 1189      |  |
| Hungary   | Goats               | 2018 | Head     | 79000     |  |
| Hungary   | Horses              | 2018 | Head     | 53000     |  |
| Hungary   | Mules               | 2018 | Head     | 176       |  |
| Hungary   | Pigs                | 2018 | Head     | 2870000   |  |
| Hungary   | Rabbitsandhares     | 2018 | 1000Head | 1169      |  |
| Hungary   | Sheep               | 2018 | Head     | 1146000   |  |
| Hungary   | Turkeys             | 2018 | 1000Head | 2905      |  |
| Iceland   | Cattle              | 2018 | Head     | 81385     |  |
| Iceland   | Chickens            | 2018 | 1000Head | 228       |  |
| Iceland   | Goats               | 2018 | Head     | 1488      |  |
| Iceland   | Horses              | 2018 | Head     | 68000     |  |
| Iceland   | Pigs                | 2018 | Head     | 29000     |  |
| Iceland   | Rabbitsandhares     | 2018 | 1000Head | 0         |  |
| Iceland   | Sheep               | 2018 | Head     | 432023    |  |
| India     | Asses               | 2018 | Head     | 229296    |  |
| India     | Beehives            | 2018 | No       | 13048275  |  |
| India     | Buffaloes           | 2018 | Head     | 114151770 |  |
| India     | Camels              | 2018 | Head     | 311960    |  |
| India     | Cattle              | 2018 | Head     | 184464035 |  |
| India     | Chickens            | 2018 | 1000Head | 801090    |  |
| India     | Ducks               | 2018 | 1000Head | 19640     |  |
| India     | Goats               | 2018 | Head     | 132749780 |  |
| India     | Horses              | 2018 | Head     | 625472    |  |
| India     | Mules               | 2018 | Head     | 230399    |  |
| India     | Pigs                | 2018 | Head     | 8485240   |  |
| India     | Sheep               | 2018 | Head     | 61666343  |  |
| Indonesia | Buffaloes           | 2018 | Head     | 894278    |  |
| Indonesia | Cattle              | 2018 | Head     | 16432945  |  |
| Indonesia | Chickens            | 2018 | 1000Head | 2384147   |  |
| Indonesia | Ducks               | 2018 | 1000Head | 60011     |  |
| Indonesia | Goats               | 2018 | Head     | 18721000  |  |
| Indonesia | Horses              | 2018 | Head     | 421000    |  |
| Indonesia | Pigs                | 2018 | Head     | 8542000   |  |
| Indonesia | Sheep               | 2018 | Head     | 17398000  |  |
| Iran      | Asses               | 2018 | Head     | 1550260   |  |
| Iran      | Beehives            | 2018 | No       | 6601394   |  |
| Iran      | Buffaloes           | 2018 | Head     | 113330    |  |
| Iran      | Camels              | 2018 | Head     | 138659    |  |
| Iran      | Cattle              | 2018 | Head     | 5244031   |  |
| Iran      | Chickens            | 2018 | 1000Head | 1071606   |  |
| Iran      | Ducks               | 2018 | 1000Head | 1602      |  |
| Iran      | Geeseandguineafowls | 2018 | 1000Head | 997       |  |

|         |                     |      |          |          |  |
|---------|---------------------|------|----------|----------|--|
| Iran    | Goats               | 2018 | Head     | 14992396 |  |
| Iran    | Horses              | 2018 | Head     | 130390   |  |
| Iran    | Mules               | 2018 | Head     | 178964   |  |
| Iran    | Pigs                | 2018 | Head     | .        |  |
| Iran    | Sheep               | 2018 | Head     | 39670704 |  |
| Iran    | Turkeys             | 2018 | 1000Head | 2041     |  |
| Iraq    | Asses               | 2018 | Head     | 379270   |  |
| Iraq    | Buffaloes           | 2018 | Head     | 215595   |  |
| Iraq    | Camels              | 2018 | Head     | 79077    |  |
| Iraq    | Cattle              | 2018 | Head     | 1996358  |  |
| Iraq    | Chickens            | 2018 | 1000Head | 47200    |  |
| Iraq    | Goats               | 2018 | Head     | 1230428  |  |
| Iraq    | Horses              | 2018 | Head     | 50509    |  |
| Iraq    | Mules               | 2018 | Head     | 10474    |  |
| Iraq    | Sheep               | 2018 | Head     | 6501583  |  |
| Ireland | Asses               | 2018 | Head     | 7190     |  |
| Ireland | Cattle              | 2018 | Head     | 7348500  |  |
| Ireland | Chickens            | 2018 | 1000Head | 15692    |  |
| Ireland | Ducks               | 2018 | 1000Head | 274      |  |
| Ireland | Geeseandguineafowls | 2018 | 1000Head | 61       |  |
| Ireland | Goats               | 2018 | Head     | 9300     |  |
| Ireland | Horses              | 2018 | Head     | 84300    |  |
| Ireland | Mules               | 2018 | Head     | 1045     |  |
| Ireland | Pigs                | 2018 | Head     | 1621900  |  |
| Ireland | Sheep               | 2018 | Head     | 5109300  |  |
| Ireland | Turkeys             | 2018 | 1000Head | 1886     |  |
| Israel  | Asses               | 2018 | Head     | 5000     |  |
| Israel  | Beehives            | 2018 | No       | 110000   |  |
| Israel  | Camels              | 2018 | Head     | 5542     |  |
| Israel  | Cattle              | 2018 | Head     | 546200   |  |
| Israel  | Chickens            | 2018 | 1000Head | 45752    |  |
| Israel  | Ducks               | 2018 | 1000Head | 182      |  |
| Israel  | Geeseandguineafowls | 2018 | 1000Head | 950      |  |
| Israel  | Goats               | 2018 | Head     | 108426   |  |
| Israel  | Horses              | 2018 | Head     | 4000     |  |
| Israel  | Mules               | 2018 | Head     | 1600     |  |
| Israel  | Pigs                | 2018 | Head     | 171000   |  |
| Israel  | Sheep               | 2018 | Head     | 477340   |  |
| Israel  | Turkeys             | 2018 | 1000Head | 3395     |  |
| Italy   | Asses               | 2018 | Head     | 20739    |  |
| Italy   | Beehives            | 2018 | No       | 386333   |  |
| Italy   | Buffaloes           | 2018 | Head     | 401337   |  |
| Italy   | Cattle              | 2018 | Head     | 5923204  |  |
| Italy   | Chickens            | 2018 | 1000Head | 150186   |  |
| Italy   | Goats               | 2018 | Head     | 986255   |  |
| Italy   | Horses              | 2018 | Head     | 369255   |  |
| Italy   | Mules               | 2018 | Head     | 6750     |  |
| Italy   | Pigs                | 2018 | Head     | 8492232  |  |
| Italy   | Rabbitsandhares     | 2018 | 1000Head | 6282     |  |
| Italy   | Sheep               | 2018 | Head     | 7179158  |  |
| Italy   | Turkeys             | 2018 | 1000Head | 25108    |  |
| Jamaica | Asses               | 2018 | Head     | 23000    |  |
| Jamaica | Beehives            | 2018 | No       | 47272    |  |
| Jamaica | Cattle              | 2018 | Head     | 123724   |  |
| Jamaica | Chickens            | 2018 | 1000Head | 14254    |  |
| Jamaica | Goats               | 2018 | Head     | 574895   |  |

|            |                     |      |          |          |  |
|------------|---------------------|------|----------|----------|--|
| Jamaica    | Horses              | 2018 | Head     | 4008     |  |
| Jamaica    | Mules               | 2018 | Head     | 10000    |  |
| Jamaica    | Pigs                | 2018 | Head     | 214733   |  |
| Jamaica    | Sheep               | 2018 | Head     | 1336     |  |
| Japan      | Beehives            | 2018 | No       | 193198   |  |
| Japan      | Cattle              | 2018 | Head     | 3842000  |  |
| Japan      | Chickens            | 2018 | 1000Head | 323126   |  |
| Japan      | Goats               | 2018 | Head     | 16009    |  |
| Japan      | Horses              | 2018 | Head     | 14249    |  |
| Japan      | Pigs                | 2018 | Head     | 9189000  |  |
| Japan      | Sheep               | 2018 | Head     | 15161    |  |
| Japan      | Turkeys             | 2018 | 1000Head | 2        |  |
| Jordan     | Asses               | 2018 | Head     | 7287     |  |
| Jordan     | Beehives            | 2018 | No       | 41371    |  |
| Jordan     | Buffaloes           | 2018 | Head     | 95       |  |
| Jordan     | Camels              | 2018 | Head     | 13545    |  |
| Jordan     | Cattle              | 2018 | Head     | 71648    |  |
| Jordan     | Chickens            | 2018 | 1000Head | 29535    |  |
| Jordan     | Ducks               | 2018 | 1000Head | 6        |  |
| Jordan     | Geeseandguineafowls | 2018 | 1000Head | 3        |  |
| Jordan     | Goats               | 2018 | Head     | 641977   |  |
| Jordan     | Horses              | 2018 | Head     | 2172     |  |
| Jordan     | Mules               | 2018 | Head     | 982      |  |
| Jordan     | Pigeons,otherbirds  | 2018 | 1000Head | 153      |  |
| Jordan     | Rabbitsandhares     | 2018 | 1000Head | 9        |  |
| Jordan     | Sheep               | 2018 | Head     | 3022882  |  |
| Jordan     | Turkeys             | 2018 | 1000Head | 3        |  |
| Kazakhstan | Asses               | 2018 | Head     | 29060    |  |
| Kazakhstan | Buffaloes           | 2018 | Head     | 10414    |  |
| Kazakhstan | Camels              | 2018 | Head     | 207566   |  |
| Kazakhstan | Cattle              | 2018 | Head     | 7150920  |  |
| Kazakhstan | Chickens            | 2018 | 1000Head | 42782    |  |
| Kazakhstan | Goats               | 2018 | Head     | 2282948  |  |
| Kazakhstan | Horses              | 2018 | Head     | 2646535  |  |
| Kazakhstan | Pigs                | 2018 | Head     | 798732   |  |
| Kazakhstan | Rabbitsandhares     | 2018 | 1000Head | 103      |  |
| Kazakhstan | Sheep               | 2018 | Head     | 16416177 |  |
| Kazakhstan | Turkeys             | 2018 | 1000Head | 1689     |  |
| Kenya      | Beehives            | 2018 | No       | 1533668  |  |
| Kenya      | Camels              | 2018 | Head     | 3273445  |  |
| Kenya      | Cattle              | 2018 | Head     | 19635142 |  |
| Kenya      | Chickens            | 2018 | 1000Head | 49068    |  |
| Kenya      | Goats               | 2018 | Head     | 26710775 |  |
| Kenya      | Horses              | 2018 | Head     | 2152     |  |
| Kenya      | Pigs                | 2018 | Head     | 567843   |  |
| Kenya      | Rabbitsandhares     | 2018 | 1000Head | 763      |  |
| Kenya      | Sheep               | 2018 | Head     | 19485699 |  |
| Kiribati   | Chickens            | 2018 | 1000Head | 681      |  |
| Kiribati   | Pigs                | 2018 | Head     | 14309    |  |
| Kuwait     | Camels              | 2018 | Head     | 12228    |  |
| Kuwait     | Cattle              | 2018 | Head     | 29072    |  |
| Kuwait     | Chickens            | 2018 | 1000Head | 53562    |  |
| Kuwait     | Goats               | 2018 | Head     | 209686   |  |
| Kuwait     | Horses              | 2018 | Head     | 1151     |  |
| Kuwait     | Sheep               | 2018 | Head     | 684231   |  |
| Kyrgyzstan | Asses               | 2018 | Head     | 28941    |  |



|            |                     |      |          |          |     |
|------------|---------------------|------|----------|----------|-----|
| Kyrgyzstan | Beehives            | 2018 | No       | 118996   |     |
| Kyrgyzstan | Camels              | 2018 | Head     | 246      |     |
| Kyrgyzstan | Cattle              | 2018 | Head     | 1627296  |     |
| Kyrgyzstan | Chickens            | 2018 | 1000Head | 4567     |     |
| Kyrgyzstan | Ducks               | 2018 | 1000Head | 90       |     |
| Kyrgyzstan | Geeseandguineafowls |      | 2018     | 1000Head | 43  |
| Kyrgyzstan | Goats               | 2018 | Head     | 806949   |     |
| Kyrgyzstan | Horses              | 2018 | Head     | 498684   |     |
| Kyrgyzstan | Mules               | 2018 | Head     | 500      |     |
| Kyrgyzstan | Pigs                | 2018 | Head     | 51265    |     |
| Kyrgyzstan | Rabbitsandhares     |      | 2018     | 1000Head | 27  |
| Kyrgyzstan | Sheep               | 2018 | Head     | 5361000  |     |
| Kyrgyzstan | Turkeys             | 2018 | 1000Head | 183      |     |
| Laos       | Buffaloes           | 2018 | Head     | 1200040  |     |
| Laos       | Cattle              | 2018 | Head     | 2040907  |     |
| Laos       | Chickens            | 2018 | 1000Head | 39218    |     |
| Laos       | Ducks               | 2018 | 1000Head | 3565     |     |
| Laos       | Geeseandguineafowls |      | 2018     | 1000Head | 110 |
| Laos       | Goats               | 2018 | Head     | 616325   |     |
| Laos       | Horses              | 2018 | Head     | 32534    |     |
| Laos       | Pigs                | 2018 | Head     | 3824663  |     |
| Latvia     | Beehives            | 2018 | No       | 96       |     |
| Latvia     | Cattle              | 2018 | Head     | 405820   |     |
| Latvia     | Chickens            | 2018 | 1000Head | 4030     |     |
| Latvia     | Goats               | 2018 | Head     | 12757    |     |
| Latvia     | Horses              | 2018 | Head     | 8870     |     |
| Latvia     | Pigs                | 2018 | Head     | 320563   |     |
| Latvia     | Rabbitsandhares     |      | 2018     | 1000Head | 29  |
| Latvia     | Sheep               | 2018 | Head     | 112208   |     |
| Latvia     | Turkeys             | 2018 | 1000Head | 3        |     |
| Lebanon    | Asses               | 2018 | Head     | 14211    |     |
| Lebanon    | Beehives            | 2018 | No       | 251121   |     |
| Lebanon    | Camels              | 2018 | Head     | 200      |     |
| Lebanon    | Cattle              | 2018 | Head     | 81993    |     |
| Lebanon    | Chickens            | 2018 | 1000Head | 74405    |     |
| Lebanon    | Goats               | 2018 | Head     | 509275   |     |
| Lebanon    | Horses              | 2018 | Head     | 3252     |     |
| Lebanon    | Mules               | 2018 | Head     | 4660     |     |
| Lebanon    | Pigs                | 2018 | Head     | 6030     |     |
| Lebanon    | Sheep               | 2018 | Head     | 459829   |     |
| Lebanon    | Turkeys             | 2018 | 1000Head | .        |     |
| Lesotho    | Asses               | 2018 | Head     | 123512   |     |
| Lesotho    | Cattle              | 2018 | Head     | 496238   |     |
| Lesotho    | Chickens            | 2018 | 1000Head | 476      |     |
| Lesotho    | Goats               | 2018 | Head     | 886772   |     |
| Lesotho    | Horses              | 2018 | Head     | 63436    |     |
| Lesotho    | Mules               | 2018 | Head     | 283      |     |
| Lesotho    | Pigs                | 2018 | Head     | 70749    |     |
| Lesotho    | Sheep               | 2018 | Head     | 1610010  |     |
| Liberia    | Cattle              | 2018 | Head     | 44891    |     |
| Liberia    | Chickens            | 2018 | 1000Head | 8944     |     |
| Liberia    | Ducks               | 2018 | 1000Head | 384      |     |
| Liberia    | Goats               | 2018 | Head     | 412810   |     |
| Liberia    | Pigs                | 2018 | Head     | 313395   |     |
| Liberia    | Sheep               | 2018 | Head     | 309992   |     |
| Libya      | Asses               | 2018 | Head     | 26784    |     |

|               |                     |      |          |          |  |
|---------------|---------------------|------|----------|----------|--|
| Libya         | Beehives            | 2018 | No       | 36489    |  |
| Libya         | Camels              | 2018 | Head     | 65726    |  |
| Libya         | Cattle              | 2018 | Head     | 216101   |  |
| Libya         | Chickens            | 2018 | 1000Head | 37359    |  |
| Libya         | Goats               | 2018 | Head     | 2635943  |  |
| Libya         | Horses              | 2018 | Head     | 45491    |  |
| Libya         | Mules               | 2018 | Head     | .        |  |
| Libya         | Sheep               | 2018 | Head     | 7449771  |  |
| Liechtenstein | Asses               | 2018 | Head     | 174      |  |
| Liechtenstein | Beehives            | 2018 | No       | 985      |  |
| Liechtenstein | Cattle              | 2018 | Head     | 5894     |  |
| Liechtenstein | Chickens            | 2018 | 1000Head | 13       |  |
| Liechtenstein | Goats               | 2018 | Head     | 431      |  |
| Liechtenstein | Horses              | 2018 | Head     | 333      |  |
| Liechtenstein | Mules               | 2018 | Head     | 8        |  |
| Liechtenstein | Pigs                | 2018 | Head     | 1772     |  |
| Liechtenstein | Sheep               | 2018 | Head     | 3989     |  |
| Lithuania     | Beehives            | 2018 | No       | 137796   |  |
| Lithuania     | Cattle              | 2018 | Head     | 676893   |  |
| Lithuania     | Chickens            | 2018 | 1000Head | 10204    |  |
| Lithuania     | Ducks               | 2018 | 1000Head | 15       |  |
| Lithuania     | Geeseandguineafowls | 2018 | 1000Head | 10       |  |
| Lithuania     | Goats               | 2018 | Head     | 14319    |  |
| Lithuania     | Horses              | 2018 | Head     | 14961    |  |
| Lithuania     | Pigs                | 2018 | Head     | 611931   |  |
| Lithuania     | Rabbitsandhares     | 2018 | 1000Head | 121      |  |
| Lithuania     | Sheep               | 2018 | Head     | 169685   |  |
| Lithuania     | Turkeys             | 2018 | 1000Head | 139      |  |
| Luxembourg    | Beehives            | 2018 | No       | 5778     |  |
| Luxembourg    | Cattle              | 2018 | Head     | 196127   |  |
| Luxembourg    | Chickens            | 2018 | 1000Head | 123      |  |
| Luxembourg    | Goats               | 2018 | Head     | 5075     |  |
| Luxembourg    | Horses              | 2018 | Head     | 4662     |  |
| Luxembourg    | Pigs                | 2018 | Head     | 91736    |  |
| Luxembourg    | Rabbitsandhares     | 2018 | 1000Head | 3        |  |
| Luxembourg    | Sheep               | 2018 | Head     | 8654     |  |
| Madagascar    | Asses               | 2018 | Head     | 158      |  |
| Madagascar    | Beehives            | 2018 | No       | 135254   |  |
| Madagascar    | Cattle              | 2018 | Head     | 10329790 |  |
| Madagascar    | Chickens            | 2018 | 1000Head | 38917    |  |
| Madagascar    | Ducks               | 2018 | 1000Head | 4535     |  |
| Madagascar    | Geeseandguineafowls | 2018 | 1000Head | 3020     |  |
| Madagascar    | Goats               | 2018 | Head     | 1538265  |  |
| Madagascar    | Horses              | 2018 | Head     | 497      |  |
| Madagascar    | Pigs                | 2018 | Head     | 1721219  |  |
| Madagascar    | Rabbitsandhares     | 2018 | 1000Head | 125      |  |
| Madagascar    | Sheep               | 2018 | Head     | 847678   |  |
| Madagascar    | Turkeys             | 2018 | 1000Head | 2348     |  |
| Malawi        | Asses               | 2018 | Head     | 6350     |  |
| Malawi        | Cattle              | 2018 | Head     | 1655517  |  |
| Malawi        | Chickens            | 2018 | 1000Head | 18606    |  |
| Malawi        | Goats               | 2018 | Head     | 8374006  |  |
| Malawi        | Horses              | 2018 | Head     | 65       |  |
| Malawi        | Pigs                | 2018 | Head     | 6388283  |  |
| Malawi        | Sheep               | 2018 | Head     | 317899   |  |
| Malaysia      | Buffaloes           | 2018 | Head     | 117707   |  |

|            |                     |      |          |          |  |
|------------|---------------------|------|----------|----------|--|
| Malaysia   | Cattle              | 2018 | Head     | 752547   |  |
| Malaysia   | Chickens            | 2018 | 1000Head | 321309   |  |
| Malaysia   | Ducks               | 2018 | 1000Head | 10477    |  |
| Malaysia   | Goats               | 2018 | Head     | 443733   |  |
| Malaysia   | Horses              | 2018 | Head     | 4121     |  |
| Malaysia   | Pigs                | 2018 | Head     | 1654801  |  |
| Malaysia   | Sheep               | 2018 | Head     | 138111   |  |
| Mali       | Asses               | 2018 | Head     | 1121898  |  |
| Mali       | Beehives            | 2018 | No       | 36162    |  |
| Mali       | Camels              | 2018 | Head     | 1216758  |  |
| Mali       | Cattle              | 2018 | Head     | 11758377 |  |
| Mali       | Chickens            | 2018 | 1000Head | 47255    |  |
| Mali       | Goats               | 2018 | Head     | 25224990 |  |
| Mali       | Horses              | 2018 | Head     | 572730   |  |
| Mali       | Pigs                | 2018 | Head     | 85160    |  |
| Mali       | Sheep               | 2018 | Head     | 18270000 |  |
| Malta      | Asses               | 2018 | Head     | 481      |  |
| Malta      | Cattle              | 2018 | Head     | 14125    |  |
| Malta      | Chickens            | 2018 | 1000Head | 1001     |  |
| Malta      | Ducks               | 2018 | 1000Head | .        |  |
| Malta      | Goats               | 2018 | Head     | 5726     |  |
| Malta      | Horses              | 2018 | Head     | 1073     |  |
| Malta      | Mules               | 2018 | Head     | 294      |  |
| Malta      | Pigs                | 2018 | Head     | 36294    |  |
| Malta      | Rabbitsandhares     | 2018 | 1000Head | 233      |  |
| Malta      | Sheep               | 2018 | Head     | 13169    |  |
| Malta      | Turkeys             | 2018 | 1000Head | 11       |  |
| Martinique | Beehives            | 2018 | No       | 0        |  |
| Martinique | Cattle              | 2018 | Head     | 12965    |  |
| Martinique | Chickens            | 2018 | 1000Head | 467      |  |
| Martinique | Ducks               | 2018 | 1000Head | .        |  |
| Martinique | Geeseandguineafowls | 2018 | 1000Head | .        |  |
| Martinique | Goats               | 2018 | Head     | 4776     |  |
| Martinique | Horses              | 2018 | Head     | 1216     |  |
| Martinique | Pigs                | 2018 | Head     | 8326     |  |
| Martinique | Rabbitsandhares     | 2018 | 1000Head | 3        |  |
| Martinique | Sheep               | 2018 | Head     | 12626    |  |
| Mauritania | Asses               | 2018 | Head     | 325582   |  |
| Mauritania | Camels              | 2018 | Head     | 1495764  |  |
| Mauritania | Cattle              | 2018 | Head     | 1912564  |  |
| Mauritania | Chickens            | 2018 | 1000Head | 4660     |  |
| Mauritania | Goats               | 2018 | Head     | 7510412  |  |
| Mauritania | Horses              | 2018 | Head     | 66610    |  |
| Mauritania | Sheep               | 2018 | Head     | 11035860 |  |
| Mauritius  | Asses               | 2018 | Head     | 60       |  |
| Mauritius  | Buffaloes           | 2018 | Head     | 25       |  |
| Mauritius  | Cattle              | 2018 | Head     | 3985     |  |
| Mauritius  | Chickens            | 2018 | 1000Head | 16518    |  |
| Mauritius  | Ducks               | 2018 | 1000Head | 40       |  |
| Mauritius  | Geeseandguineafowls | 2018 | 1000Head | 21       |  |
| Mauritius  | Goats               | 2018 | Head     | 26026    |  |
| Mauritius  | Horses              | 2018 | Head     | 150      |  |
| Mauritius  | Mules               | 2018 | Head     | 20       |  |
| Mauritius  | Pigs                | 2018 | Head     | 19662    |  |
| Mauritius  | Rabbitsandhares     | 2018 | 1000Head | 5        |  |
| Mauritius  | Sheep               | 2018 | Head     | 3806     |  |

|                               |                 |      |          |          |
|-------------------------------|-----------------|------|----------|----------|
| Mauritius                     | Turkeys         | 2018 | 1000Head | 2        |
| Mexico                        | Asses           | 2018 | Head     | 3283853  |
| Mexico                        | Beehives        | 2018 | No       | 2172107  |
| Mexico                        | Cattle          | 2018 | Head     | 34820271 |
| Mexico                        | Chickens        | 2018 | 1000Head | 568372   |
| Mexico                        | Ducks           | 2018 | 1000Head | 8504     |
| Mexico                        | Goats           | 2018 | Head     | 8749589  |
| Mexico                        | Horses          | 2018 | Head     | 6385102  |
| Mexico                        | Mules           | 2018 | Head     | 3287449  |
| Mexico                        | Pigs            | 2018 | Head     | 17838900 |
| Mexico                        | Rabbitsandhares | 2018 | 1000Head | 1407     |
| Mexico                        | Sheep           | 2018 | Head     | 8683835  |
| Mexico                        | Turkeys         | 2018 | 1000Head | 3775     |
| Micronesia(FederatedStatesof) | Buffaloes       | 2018 | Head     | 177      |
| Micronesia(FederatedStatesof) | Cattle          | 2018 | Head     | 18023    |
| Micronesia(FederatedStatesof) | Chickens        | 2018 | 1000Head | 191      |
| Micronesia(FederatedStatesof) | Ducks           | 2018 | 1000Head | 1        |
| Micronesia(FederatedStatesof) | Goats           | 2018 | Head     | 4672     |
| Micronesia(FederatedStatesof) | Pigs            | 2018 | Head     | 37927    |
| Mongolia                      | Asses           | 2018 | Head     | 38       |
| Mongolia                      | Beehives        | 2018 | No       | 9791     |
| Mongolia                      | Camels          | 2018 | Head     | 459702   |
| Mongolia                      | Cattle          | 2018 | Head     | 4380879  |
| Mongolia                      | Chickens        | 2018 | 1000Head | 878      |
| Mongolia                      | Goats           | 2018 | Head     | 27124703 |
| Mongolia                      | Horses          | 2018 | Head     | 3940092  |
| Mongolia                      | Pigs            | 2018 | Head     | 27819    |
| Mongolia                      | Sheep           | 2018 | Head     | 30554804 |
| Montenegro                    | Beehives        | 2018 | No       | 65425    |
| Montenegro                    | Cattle          | 2018 | Head     | 86539    |
| Montenegro                    | Chickens        | 2018 | 1000Head | 680      |
| Montenegro                    | Goats           | 2018 | Head     | 30087    |
| Montenegro                    | Horses          | 2018 | Head     | 4053     |
| Montenegro                    | Pigs            | 2018 | Head     | 21821    |
| Montenegro                    | Sheep           | 2018 | Head     | 186490   |
| Montserrat                    | Asses           | 2018 | Head     | 404      |
| Montserrat                    | Cattle          | 2018 | Head     | 10074    |
| Montserrat                    | Chickens        | 2018 | 1000Head | 35       |
| Montserrat                    | Goats           | 2018 | Head     | 7186     |
| Montserrat                    | Pigs            | 2018 | Head     | 1232     |
| Montserrat                    | Sheep           | 2018 | Head     | 4839     |
| Morocco                       | Asses           | 2018 | Head     | 934000   |
| Morocco                       | Beehives        | 2018 | No       | 370895   |
| Morocco                       | Camels          | 2018 | Head     | 59823    |
| Morocco                       | Cattle          | 2018 | Head     | 3441000  |
| Morocco                       | Chickens        | 2018 | 1000Head | 204604   |
| Morocco                       | Goats           | 2018 | Head     | 5731000  |
| Morocco                       | Horses          | 2018 | Head     | 190000   |
| Morocco                       | Mules           | 2018 | Head     | 390000   |
| Morocco                       | Pigs            | 2018 | Head     | 8001     |
| Morocco                       | Sheep           | 2018 | Head     | 19880000 |
| Morocco                       | Turkeys         | 2018 | 1000Head | 9995     |
| Mozambique                    | Asses           | 2018 | Head     | 49428    |
| Mozambique                    | Beehives        | 2018 | No       | 46243    |
| Mozambique                    | Cattle          | 2018 | Head     | 2020189  |
| Mozambique                    | Chickens        | 2018 | 1000Head | 16916    |

|              |                     |      |          |          |       |
|--------------|---------------------|------|----------|----------|-------|
| Mozambique   | Ducks               | 2018 | 1000Head | 2552     |       |
| Mozambique   | Geeseandguineafowls |      | 2018     | 1000Head | 15857 |
| Mozambique   | Goats               | 2018 | Head     | 3759597  |       |
| Mozambique   | Pigs                | 2018 | Head     | 1680213  |       |
| Mozambique   | Rabbitsandhares     |      | 2018     | 1000Head | 112   |
| Mozambique   | Sheep               | 2018 | Head     | 169310   |       |
| Mozambique   | Turkeys             | 2018 | 1000Head | 178      |       |
| Myanmar      | Beehives            | 2018 | No       | 68691    |       |
| Myanmar      | Buffaloes           | 2018 | Head     | 3790031  |       |
| Myanmar      | Cattle              | 2018 | Head     | 17418364 |       |
| Myanmar      | Chickens            | 2018 | 1000Head | 309011   |       |
| Myanmar      | Ducks               | 2018 | 1000Head | 18930    |       |
| Myanmar      | Geeseandguineafowls |      | 2018     | 1000Head | 2265  |
| Myanmar      | Goats               | 2018 | Head     | 4591807  |       |
| Myanmar      | Horses              | 2018 | Head     | 96810    |       |
| Myanmar      | Mules               | 2018 | Head     | 999      |       |
| Myanmar      | Pigeons,otherbirds  |      | 2018     | 1000Head | 722   |
| Myanmar      | Pigs                | 2018 | Head     | 12934454 |       |
| Myanmar      | Sheep               | 2018 | Head     | 1334305  |       |
| Myanmar      | Turkeys             | 2018 | 1000Head | 3        |       |
| Namibia      | Asses               | 2018 | Head     | 153126   |       |
| Namibia      | Camels              | 2018 | Head     | 91       |       |
| Namibia      | Cattle              | 2018 | Head     | 2897115  |       |
| Namibia      | Chickens            | 2018 | 1000Head | 4394     |       |
| Namibia      | Goats               | 2018 | Head     | 1895379  |       |
| Namibia      | Horses              | 2018 | Head     | 44199    |       |
| Namibia      | Mules               | 2018 | Head     | 6768     |       |
| Namibia      | Pigeons,otherbirds  |      | 2018     | 1000Head | 157   |
| Namibia      | Pigs                | 2018 | Head     | 94746    |       |
| Namibia      | Sheep               | 2018 | Head     | 1717774  |       |
| Nauru        | Chickens            | 2018 | 1000Head | 5        |       |
| Nauru        | Pigs                | 2018 | Head     | 3041     |       |
| Nepal        | Buffaloes           | 2018 | Head     | 5277819  |       |
| Nepal        | Cattle              | 2018 | Head     | 7376306  |       |
| Nepal        | Chickens            | 2018 | 1000Head | 72245    |       |
| Nepal        | Ducks               | 2018 | 1000Head | 404      |       |
| Nepal        | Goats               | 2018 | Head     | 11647319 |       |
| Nepal        | Pigs                | 2018 | Head     | 1435369  |       |
| Nepal        | Sheep               | 2018 | Head     | 800749   |       |
| Netherlands  | Beehives            | 2018 | No       | .        |       |
| Netherlands  | Cattle              | 2018 | Head     | 3850370  |       |
| Netherlands  | Chickens            | 2018 | 1000Head | 103797   |       |
| Netherlands  | Ducks               | 2018 | 1000Head | 1026     |       |
| Netherlands  | Goats               | 2018 | Head     | 561357   |       |
| Netherlands  | Horses              | 2018 | Head     | 141386   |       |
| Netherlands  | Pigs                | 2018 | Head     | 12418538 |       |
| Netherlands  | Rabbitsandhares     |      | 2018     | 1000Head | 326   |
| Netherlands  | Sheep               | 2018 | Head     | 956943   |       |
| Netherlands  | Turkeys             | 2018 | 1000Head | 615      |       |
| NetherA      | Asses               | 2018 | Head     | 2763     |       |
| NetherA      | Cattle              | 2018 | Head     | 508      |       |
| NetherA      | Chickens            | 2018 | 1000Head | 163      |       |
| NetherA      | Goats               | 2018 | Head     | 14146    |       |
| NetherA      | Pigs                | 2018 | Head     | 2913     |       |
| NetherA      | Sheep               | 2018 | Head     | 10005    |       |
| NewCaledonia | Beehives            | 2018 | No       | 7250     |       |

|                |                     |      |          |          |  |
|----------------|---------------------|------|----------|----------|--|
| NewCaledonia   | Cattle              | 2018 | Head     | 83493    |  |
| NewCaledonia   | Chickens            | 2018 | 1000Head | 477      |  |
| NewCaledonia   | Goats               | 2018 | Head     | 1980     |  |
| NewCaledonia   | Horses              | 2018 | Head     | 11277    |  |
| NewCaledonia   | Pigs                | 2018 | Head     | 40268    |  |
| NewCaledonia   | Sheep               | 2018 | Head     | 2270     |  |
| NewZealand     | Beehives            | 2018 | No       | 879758   |  |
| NewZealand     | Cattle              | 2018 | Head     | 10106803 |  |
| NewZealand     | Chickens            | 2018 | 1000Head | 24161    |  |
| NewZealand     | Ducks               | 2018 | 1000Head | 183      |  |
| NewZealand     | Geeseandguineafowls | 2018 | 1000Head | 86       |  |
| NewZealand     | Goats               | 2018 | Head     | 80833    |  |
| NewZealand     | Horses              | 2018 | Head     | 40525    |  |
| NewZealand     | Pigs                | 2018 | Head     | 287051   |  |
| NewZealand     | Sheep               | 2018 | Head     | 27295749 |  |
| NewZealand     | Turkeys             | 2018 | 1000Head | 77       |  |
| Nicaragua      | Asses               | 2018 | Head     | 9078     |  |
| Nicaragua      | Cattle              | 2018 | Head     | 5157570  |  |
| Nicaragua      | Chickens            | 2018 | 1000Head | 23561    |  |
| Nicaragua      | Goats               | 2018 | Head     | 7789     |  |
| Nicaragua      | Horses              | 2018 | Head     | 268182   |  |
| Nicaragua      | Mules               | 2018 | Head     | 48021    |  |
| Nicaragua      | Pigs                | 2018 | Head     | 520478   |  |
| Nicaragua      | Sheep               | 2018 | Head     | 6768     |  |
| Niger          | Asses               | 2018 | Head     | 1874178  |  |
| Niger          | Camels              | 2018 | Head     | 1811395  |  |
| Niger          | Cattle              | 2018 | Head     | 14363595 |  |
| Niger          | Chickens            | 2018 | 1000Head | 19822    |  |
| Niger          | Goats               | 2018 | Head     | 17411659 |  |
| Niger          | Horses              | 2018 | Head     | 253189   |  |
| Niger          | Pigs                | 2018 | Head     | 42905    |  |
| Niger          | Sheep               | 2018 | Head     | 12746788 |  |
| Nigeria        | Asses               | 2018 | Head     | 1346203  |  |
| Nigeria        | Beehives            | 2018 | No       | .        |  |
| Nigeria        | Camels              | 2018 | Head     | 283395   |  |
| Nigeria        | Cattle              | 2018 | Head     | 21418189 |  |
| Nigeria        | Chickens            | 2018 | 1000Head | 139431   |  |
| Nigeria        | Goats               | 2018 | Head     | 79382178 |  |
| Nigeria        | Horses              | 2018 | Head     | 85941    |  |
| Nigeria        | Pigs                | 2018 | Head     | 7499165  |  |
| Nigeria        | Rabbitsandhares     | 2018 | 1000Head | 4678     |  |
| Nigeria        | Sheep               | 2018 | Head     | 42971860 |  |
| Niue           | Beehives            | 2018 | No       | 821      |  |
| Niue           | Cattle              | 2018 | Head     | 113      |  |
| Niue           | Chickens            | 2018 | 1000Head | 18       |  |
| Niue           | Pigs                | 2018 | Head     | 2250     |  |
| NorfolkIsland  | Cattle              | 2018 | Head     | .        |  |
| NorthMacedonia | Beehives            | 2018 | No       | 81197    |  |
| NorthMacedonia | Buffaloes           | 2018 | Head     | 643      |  |
| NorthMacedonia | Cattle              | 2018 | Head     | 256181   |  |
| NorthMacedonia | Chickens            | 2018 | 1000Head | 1828     |  |
| NorthMacedonia | Goats               | 2018 | Head     | 117447   |  |
| NorthMacedonia | Horses              | 2018 | Head     | 10041    |  |
| NorthMacedonia | Pigs                | 2018 | Head     | 195538   |  |
| NorthMacedonia | Sheep               | 2018 | Head     | 726990   |  |
| Norway         | Cattle              | 2018 | Head     | 882350   |  |

|                |                     |      |          |          |     |
|----------------|---------------------|------|----------|----------|-----|
| Norway         | Chickens            | 2018 | 1000Head | 15734    |     |
| Norway         | Ducks               | 2018 | 1000Head | 184      |     |
| Norway         | Goats               | 2018 | Head     | 65706    |     |
| Norway         | Horses              | 2018 | Head     | 34162    |     |
| Norway         | Pigs                | 2018 | Head     | 817213   |     |
| Norway         | Rabbitsandhares     | 2018 | 1000Head |          | 1   |
| Norway         | Sheep               | 2018 | Head     | 2402828  |     |
| Norway         | Turkeys             | 2018 | 1000Head | 571      |     |
| Oman           | Asses               | 2018 | Head     | 22882    |     |
| Oman           | Beehives            | 2018 | No       | 100000   |     |
| Oman           | Camels              | 2018 | Head     | 268127   |     |
| Oman           | Cattle              | 2018 | Head     | 396913   |     |
| Oman           | Chickens            | 2018 | 1000Head | 4869     |     |
| Oman           | Ducks               | 2018 | 1000Head | .        |     |
| Oman           | Goats               | 2018 | Head     | 2302232  |     |
| Oman           | Sheep               | 2018 | Head     | 605288   |     |
| Pakistan       | Asses               | 2018 | Head     | 5319000  |     |
| Pakistan       | Beehives            | 2018 | No       | 397153   |     |
| Pakistan       | Buffaloes           | 2018 | Head     | 38848000 |     |
| Pakistan       | Camels              | 2018 | Head     | 1076000  |     |
| Pakistan       | Cattle              | 2018 | Head     | 46084000 |     |
| Pakistan       | Chickens            | 2018 | 1000Head | 524137   |     |
| Pakistan       | Ducks               | 2018 | 1000Head | 3840     |     |
| Pakistan       | Goats               | 2018 | Head     | 74134000 |     |
| Pakistan       | Horses              | 2018 | Head     | 369000   |     |
| Pakistan       | Mules               | 2018 | Head     | 192000   |     |
| Pakistan       | Sheep               | 2018 | Head     | 30498000 |     |
| Palestine      | Beehives            | 2018 | No       | 36796    |     |
| Palestine      | Cattle              | 2018 | Head     | 31432    |     |
| Palestine      | Chickens            | 2018 | 1000Head | 6815     |     |
| Palestine      | Goats               | 2018 | Head     | 208491   |     |
| Palestine      | Sheep               | 2018 | Head     | 753677   |     |
| Panama         | Cattle              | 2018 | Head     | 1558400  |     |
| Panama         | Chickens            | 2018 | 1000Head | 26278    |     |
| Panama         | Ducks               | 2018 | 1000Head | 108      |     |
| Panama         | Goats               | 2018 | Head     | 9193     |     |
| Panama         | Horses              | 2018 | Head     | 100093   |     |
| Panama         | Mules               | 2018 | Head     | 2171     |     |
| Panama         | Pigs                | 2018 | Head     | 369200   |     |
| Panama         | Turkeys             | 2018 | 1000Head | 17       |     |
| PapuaNewGuinea | Cattle              | 2018 | Head     | 93249    |     |
| PapuaNewGuinea | Chickens            | 2018 | 1000Head | 4619     |     |
| PapuaNewGuinea | Ducks               | 2018 | 1000Head | 18       |     |
| PapuaNewGuinea | Goats               | 2018 | Head     | 3015     |     |
| PapuaNewGuinea | Horses              | 2018 | Head     | 2053     |     |
| PapuaNewGuinea | Pigs                | 2018 | Head     | 2152024  |     |
| PapuaNewGuinea | Sheep               | 2018 | Head     | 7350     |     |
| PapuaNewGuinea | Turkeys             | 2018 | 1000Head | 17       |     |
| Paraguay       | Asses               | 2018 | Head     | 34988    |     |
| Paraguay       | Beehives            | 2018 | No       | 58618    |     |
| Paraguay       | Cattle              | 2018 | Head     | 13500965 |     |
| Paraguay       | Chickens            | 2018 | 1000Head | 18219    |     |
| Paraguay       | Ducks               | 2018 | 1000Head | 1447     |     |
| Paraguay       | Geeseandguineafowls | 2018 | 1000Head |          | 132 |
| Paraguay       | Goats               | 2018 | Head     | 146386   |     |
| Paraguay       | Horses              | 2018 | Head     | 271380   |     |

|             |                     |      |          |          |  |
|-------------|---------------------|------|----------|----------|--|
| Paraguay    | Mules               | 2018 | Head     | 10606    |  |
| Paraguay    | Pigs                | 2018 | Head     | 1268387  |  |
| Paraguay    | Sheep               | 2018 | Head     | 531947   |  |
| Paraguay    | Turkeys             | 2018 | 1000Head | 223      |  |
| Peru        | Asses               | 2018 | Head     | 648844   |  |
| Peru        | Camelids,other      | 2018 | Head     | 6042918  |  |
| Peru        | Cattle              | 2018 | Head     | 5575483  |  |
| Peru        | Chickens            | 2018 | 1000Head | 160659   |  |
| Peru        | Goats               | 2018 | Head     | 1807028  |  |
| Peru        | Horses              | 2018 | Head     | 748815   |  |
| Peru        | Mules               | 2018 | Head     | 317664   |  |
| Peru        | Pigs                | 2018 | Head     | 3227564  |  |
| Peru        | Rabbitsandhares     | 2018 | 1000Head | 1182     |  |
| Peru        | Rodents,other       | 2018 | 1000Head | 18762    |  |
| Peru        | Sheep               | 2018 | Head     | 11331908 |  |
| Philippines | Buffaloes           | 2018 | Head     | 2882655  |  |
| Philippines | Cattle              | 2018 | Head     | 2553937  |  |
| Philippines | Chickens            | 2018 | 1000Head | 175772   |  |
| Philippines | Ducks               | 2018 | 1000Head | 11220    |  |
| Philippines | Geeseandguineafowls | 2018 | 1000Head | 406      |  |
| Philippines | Goats               | 2018 | Head     | 3724808  |  |
| Philippines | Horses              | 2018 | Head     | 249164   |  |
| Philippines | Pigs                | 2018 | Head     | 12604441 |  |
| Philippines | Sheep               | 2018 | Head     | 30000    |  |
| Philippines | Turkeys             | 2018 | 1000Head | 584      |  |
| Poland      | Beehives            | 2018 | No       | 1586063  |  |
| Poland      | Cattle              | 2018 | Head     | 6201441  |  |
| Poland      | Chickens            | 2018 | 1000Head | 182200   |  |
| Poland      | Ducks               | 2018 | 1000Head | 4571     |  |
| Poland      | Geeseandguineafowls | 2018 | 1000Head | 5132     |  |
| Poland      | Goats               | 2018 | Head     | 44204    |  |
| Poland      | Horses              | 2018 | Head     | 185494   |  |
| Poland      | Pigs                | 2018 | Head     | 11827520 |  |
| Poland      | Rabbitsandhares     | 2018 | 1000Head | 350      |  |
| Poland      | Sheep               | 2018 | Head     | 276737   |  |
| Poland      | Turkeys             | 2018 | 1000Head | 14173    |  |
| Portugal    | Asses               | 2018 | Head     | 7884     |  |
| Portugal    | Beehives            | 2018 | No       | 213009   |  |
| Portugal    | Cattle              | 2018 | Head     | 1632000  |  |
| Portugal    | Chickens            | 2018 | 1000Head | 10811    |  |
| Portugal    | Ducks               | 2018 | 1000Head | .        |  |
| Portugal    | Goats               | 2018 | Head     | 333000   |  |
| Portugal    | Horses              | 2018 | Head     | 25803    |  |
| Portugal    | Mules               | 2018 | Head     | 3078     |  |
| Portugal    | Pigs                | 2018 | Head     | 2205000  |  |
| Portugal    | Sheep               | 2018 | Head     | 2208000  |  |
| Portugal    | Turkeys             | 2018 | 1000Head | 6436     |  |
| PuertoRico  | Asses               | 2018 | Head     | 2000     |  |
| PuertoRico  | Beehives            | 2018 | No       | 2923     |  |
| PuertoRico  | Cattle              | 2018 | Head     | 370625   |  |
| PuertoRico  | Chickens            | 2018 | 1000Head | 15336    |  |
| PuertoRico  | Goats               | 2018 | Head     | 2687     |  |
| PuertoRico  | Horses              | 2018 | Head     | 5710     |  |
| PuertoRico  | Mules               | 2018 | Head     | 2618     |  |
| PuertoRico  | Pigs                | 2018 | Head     | 42417    |  |
| PuertoRico  | Rabbitsandhares     | 2018 | 1000Head | 34       |  |



| Puerto Rico | Sheep               | 2018 | Head     | 6998     |      |
|-------------|---------------------|------|----------|----------|------|
| Qatar       | Camels              | 2018 | Head     | 95012    |      |
| Qatar       | Cattle              | 2018 | Head     | 14168    |      |
| Qatar       | Chickens            | 2018 | 1000Head | 9336     |      |
| Qatar       | Goats               | 2018 | Head     | 246286   |      |
| Qatar       | Horses              | 2018 | Head     | 6623     |      |
| Qatar       | Sheep               | 2018 | Head     | 272485   |      |
| SKorea      | Asses               | 2018 | Head     | 0        |      |
| SKorea      | Beehives            | 2018 | No       | 2165616  |      |
| SKorea      | Cattle              | 2018 | Head     | 3520886  |      |
| SKorea      | Chickens            | 2018 | 1000Head | 172538   |      |
| SKorea      | Ducks               | 2018 | 1000Head | 7317     |      |
| SKorea      | Geeseandguineafowls | 2018 | 2018     | 1000Head | 7    |
| SKorea      | Goats               | 2018 | Head     | 374355   |      |
| SKorea      | Horses              | 2018 | Head     | 26715    |      |
| SKorea      | Mules               | 2018 | Head     | 0        |      |
| SKorea      | Pigs                | 2018 | Head     | 11332812 |      |
| SKorea      | Rabbitsandhares     | 2018 | 2018     | 1000Head | 166  |
| SKorea      | Sheep               | 2018 | Head     | 2329     |      |
| SKorea      | Turkeys             | 2018 | 1000Head | 10       |      |
| Moldova     | Asses               | 2018 | Head     | 4995     |      |
| Moldova     | Beehives            | 2018 | No       | 163589   |      |
| Moldova     | Cattle              | 2018 | Head     | 167423   |      |
| Moldova     | Chickens            | 2018 | 1000Head | 40000    |      |
| Moldova     | Goats               | 2018 | Head     | 162576   |      |
| Moldova     | Horses              | 2018 | Head     | 33579    |      |
| Moldova     | Pigs                | 2018 | Head     | 406411   |      |
| Moldova     | Rabbitsandhares     | 2018 | 2018     | 1000Head | 376  |
| Moldova     | Sheep               | 2018 | Head     | 679149   |      |
| Moldova     | Turkeys             | 2018 | 1000Head | 151      |      |
| Réunion     | Asses               | 2018 | Head     | 9        |      |
| Réunion     | Cattle              | 2018 | Head     | 31000    |      |
| Réunion     | Chickens            | 2018 | 1000Head | 17526    |      |
| Réunion     | Ducks               | 2018 | 1000Head | 531      |      |
| Réunion     | Geeseandguineafowls | 2018 | 2018     | 1000Head | 12   |
| Réunion     | Goats               | 2018 | Head     | 41901    |      |
| Réunion     | Horses              | 2018 | Head     | 368      |      |
| Réunion     | Mules               | 2018 | Head     | 5        |      |
| Réunion     | Pigs                | 2018 | Head     | 68829    |      |
| Réunion     | Rabbitsandhares     | 2018 | 2018     | 1000Head | 264  |
| Réunion     | Sheep               | 2018 | Head     | 897      |      |
| Réunion     | Turkeys             | 2018 | 1000Head | 242      |      |
| Romania     | Asses               | 2018 | Head     | 30414    |      |
| Romania     | Beehives            | 2018 | No       | 1602453  |      |
| Romania     | Cattle              | 2018 | Head     | 2011100  |      |
| Romania     | Chickens            | 2018 | 1000Head | 73289    |      |
| Romania     | Ducks               | 2018 | 1000Head | 4207     |      |
| Romania     | Geeseandguineafowls | 2018 | 2018     | 1000Head | 4710 |
| Romania     | Goats               | 2018 | Head     | 1503300  |      |
| Romania     | Horses              | 2018 | Head     | 447791   |      |
| Romania     | Pigs                | 2018 | Head     | 4406000  |      |
| Romania     | Rabbitsandhares     | 2018 | 2018     | 1000Head | 1849 |
| Romania     | Sheep               | 2018 | Head     | 9981900  |      |
| Romania     | Turkeys             | 2018 | 1000Head | 1004     |      |
| Russia      | Asses               | 2018 | Head     | 8148     |      |
| Russia      | Beehives            | 2018 | No       | 3182399  |      |

|                                        |                     |      |          |          |  |  |
|----------------------------------------|---------------------|------|----------|----------|--|--|
| Russia                                 | Buffaloes           | 2018 | Head     | 5311     |  |  |
| Russia                                 | Camels              | 2018 | Head     | 5729     |  |  |
| Russia                                 | Cattle              | 2018 | Head     | 18294228 |  |  |
| Russia                                 | Chickens            | 2018 | 1000Head | 507050   |  |  |
| Russia                                 | Ducks               | 2018 | 1000Head | 21863    |  |  |
| Russia                                 | Geeseandguineafowls | 2018 | 1000Head | 3695     |  |  |
| Russia                                 | Goats               | 2018 | Head     | 2041790  |  |  |
| Russia                                 | Horses              | 2018 | Head     | 1238587  |  |  |
| Russia                                 | Mules               | 2018 | Head     | 161      |  |  |
| Russia                                 | Pigs                | 2018 | Head     | 23075510 |  |  |
| Russia                                 | Rabbitsandhares     | 2018 | 1000Head | 3745     |  |  |
| Russia                                 | Sheep               | 2018 | Head     | 22347284 |  |  |
| Russia                                 | Turkeys             | 2018 | 1000Head | 8961     |  |  |
| Rwanda                                 | Beehives            | 2018 | No       | 4209     |  |  |
| Rwanda                                 | Cattle              | 2018 | Head     | 1293768  |  |  |
| Rwanda                                 | Chickens            | 2018 | 1000Head | 5442     |  |  |
| Rwanda                                 | Ducks               | 2018 | 1000Head | 25       |  |  |
| Rwanda                                 | Geeseandguineafowls | 2018 | 1000Head | 12       |  |  |
| Rwanda                                 | Goats               | 2018 | Head     | 2731795  |  |  |
| Rwanda                                 | Pigs                | 2018 | Head     | 1330461  |  |  |
| Rwanda                                 | Rabbitsandhares     | 2018 | 1000Head | 1265     |  |  |
| Rwanda                                 | Sheep               | 2018 | Head     | 601836   |  |  |
| SaintHelena,AscensionandTristandaCunha | Asses               | 2018 | Head     | 404      |  |  |
| SaintHelena,AscensionandTristandaCunha | Cattle              | 2018 | Head     | 665      |  |  |
| SaintHelena,AscensionandTristandaCunha | Chickens            | 2018 | 1000Head | 9        |  |  |
| SaintHelena,AscensionandTristandaCunha | Goats               | 2018 | Head     | 1103     |  |  |
| SaintHelena,AscensionandTristandaCunha | Horses              | 2018 | Head     | 0        |  |  |
| SaintHelena,AscensionandTristandaCunha | Pigs                | 2018 | Head     | 623      |  |  |
| SaintHelena,AscensionandTristandaCunha | Sheep               | 2018 | Head     | 794      |  |  |
| SaintKittsandNevis                     | Cattle              | 2018 | Head     | 2067     |  |  |
| SaintKittsandNevis                     | Chickens            | 2018 | 1000Head | 93       |  |  |
| SaintKittsandNevis                     | Goats               | 2018 | Head     | 4359     |  |  |
| SaintKittsandNevis                     | Pigs                | 2018 | Head     | 7276     |  |  |
| SaintKittsandNevis                     | Sheep               | 2018 | Head     | 5944     |  |  |
| SaintLucia                             | Asses               | 2018 | Head     | 626      |  |  |
| SaintLucia                             | Cattle              | 2018 | Head     | 10854    |  |  |
| SaintLucia                             | Chickens            | 2018 | 1000Head | 464      |  |  |
| SaintLucia                             | Goats               | 2018 | Head     | 13262    |  |  |
| SaintLucia                             | Horses              | 2018 | Head     | 1131     |  |  |
| SaintLucia                             | Mules               | 2018 | Head     | 1125     |  |  |
| SaintLucia                             | Pigs                | 2018 | Head     | 42808    |  |  |
| SaintLucia                             | Sheep               | 2018 | Head     | 9064     |  |  |
| SaintPierreandMiquelon                 | Cattle              | 2018 | Head     | 38       |  |  |
| SaintPierreandMiquelon                 | Chickens            | 2018 | 1000Head | 44       |  |  |
| SaintPierreandMiquelon                 | Ducks               | 2018 | 1000Head | 1        |  |  |
| SaintPierreandMiquelon                 | Goats               | 2018 | Head     | .        |  |  |
| SaintPierreandMiquelon                 | Horses              | 2018 | Head     | .        |  |  |
| SaintPierreandMiquelon                 | Pigs                | 2018 | Head     | .        |  |  |
| SaintPierreandMiquelon                 | Sheep               | 2018 | Head     | 208      |  |  |
| SaintVincentandtheGrenadines           | Asses               | 2018 | Head     | 1316     |  |  |
| SaintVincentandtheGrenadines           | Cattle              | 2018 | Head     | 3903     |  |  |
| SaintVincentandtheGrenadines           | Chickens            | 2018 | 1000Head | 251      |  |  |
| SaintVincentandtheGrenadines           | Goats               | 2018 | Head     | 9921     |  |  |
| SaintVincentandtheGrenadines           | Pigs                | 2018 | Head     | 5958     |  |  |
| SaintVincentandtheGrenadines           | Sheep               | 2018 | Head     | 8430     |  |  |
| Samoa                                  | Asses               | 2018 | Head     | 7000     |  |  |

|                    |                     |      |          |         |  |
|--------------------|---------------------|------|----------|---------|--|
| Samoa              | Beehives            | 2018 | No       | 11047   |  |
| Samoa              | Cattle              | 2018 | Head     | 53151   |  |
| Samoa              | Chickens            | 2018 | 1000Head | 501     |  |
| Samoa              | Horses              | 2018 | Head     | 1950    |  |
| Samoa              | Pigs                | 2018 | Head     | 164820  |  |
| SaoTomeandPrincipe | Asses               | 2018 | Head     | 47      |  |
| SaoTomeandPrincipe | Cattle              | 2018 | Head     | 1407    |  |
| SaoTomeandPrincipe | Chickens            | 2018 | 1000Head | 319     |  |
| SaoTomeandPrincipe | Ducks               | 2018 | 1000Head | 34      |  |
| SaoTomeandPrincipe | Goats               | 2018 | Head     | 5982    |  |
| SaoTomeandPrincipe | Horses              | 2018 | Head     | 303     |  |
| SaoTomeandPrincipe | Mules               | 2018 | Head     | 32      |  |
| SaoTomeandPrincipe | Pigs                | 2018 | Head     | 37300   |  |
| SaoTomeandPrincipe | Sheep               | 2018 | Head     | 3436    |  |
| SaoTomeandPrincipe | Turkeys             | 2018 | 1000Head | 3       |  |
| SaudiArabia        | Asses               | 2018 | Head     | 98767   |  |
| SaudiArabia        | Camels              | 2018 | Head     | 490672  |  |
| SaudiArabia        | Cattle              | 2018 | Head     | 368428  |  |
| SaudiArabia        | Chickens            | 2018 | 1000Head | 194536  |  |
| SaudiArabia        | Goats               | 2018 | Head     | 3706798 |  |
| SaudiArabia        | Horses              | 2018 | Head     | 28016   |  |
| SaudiArabia        | Pigeons,otherbirds  | 2018 | 1000Head | 4877    |  |
| SaudiArabia        | Sheep               | 2018 | Head     | 9408766 |  |
| Senegal            | Asses               | 2018 | Head     | 485994  |  |
| Senegal            | Beehives            | 2018 | No       | 340882  |  |
| Senegal            | Camels              | 2018 | Head     | 4585    |  |
| Senegal            | Cattle              | 2018 | Head     | 3615523 |  |
| Senegal            | Chickens            | 2018 | 1000Head | 50340   |  |
| Senegal            | Goats               | 2018 | Head     | 5846443 |  |
| Senegal            | Horses              | 2018 | Head     | 553726  |  |
| Senegal            | Pigs                | 2018 | Head     | 422414  |  |
| Senegal            | Sheep               | 2018 | Head     | 6096261 |  |
| Serbia             | Beehives            | 2018 | No       | 914134  |  |
| Serbia             | Cattle              | 2018 | Head     | 878336  |  |
| Serbia             | Chickens            | 2018 | 1000Head | 15685   |  |
| Serbia             | Ducks               | 2018 | 1000Head | 166     |  |
| Serbia             | Geeseandguineafowls | 2018 | 1000Head | 75      |  |
| Serbia             | Goats               | 2018 | Head     | 195932  |  |
| Serbia             | Horses              | 2018 | Head     | 14973   |  |
| Serbia             | Pigs                | 2018 | Head     | 2782282 |  |
| Serbia             | Sheep               | 2018 | Head     | 1711677 |  |
| Serbia             | Turkeys             | 2018 | 1000Head | 207     |  |
| Seychelles         | Cattle              | 2018 | Head     | 261     |  |
| Seychelles         | Chickens            | 2018 | 1000Head | 203     |  |
| Seychelles         | Ducks               | 2018 | 1000Head | 5       |  |
| Seychelles         | Goats               | 2018 | Head     | 5666    |  |
| Seychelles         | Pigs                | 2018 | Head     | 4453    |  |
| SierraLeone        | Cattle              | 2018 | Head     | 702303  |  |
| SierraLeone        | Chickens            | 2018 | 1000Head | 12437   |  |
| SierraLeone        | Ducks               | 2018 | 1000Head | 1104    |  |
| SierraLeone        | Goats               | 2018 | Head     | 904511  |  |
| SierraLeone        | Horses              | 2018 | Head     | 440599  |  |
| SierraLeone        | Pigs                | 2018 | Head     | 47232   |  |
| SierraLeone        | Rabbitsandhares     | 2018 | 1000Head | 1593    |  |
| SierraLeone        | Sheep               | 2018 | Head     | 871388  |  |
| Singapore          | Buffaloes           | 2018 | Head     | .       |  |

|                |                     |      |          |          |     |
|----------------|---------------------|------|----------|----------|-----|
| Singapore      | Cattle              | 2018 | Head     | 179      |     |
| Singapore      | Chickens            | 2018 | 1000Head | 3724     |     |
| Singapore      | Ducks               | 2018 | 1000Head | .        |     |
| Singapore      | Goats               | 2018 | Head     | 742      |     |
| Singapore      | Pigs                | 2018 | Head     | .        |     |
| Slovakia       | Beehives            | 2018 | No       | 278385   |     |
| Slovakia       | Cattle              | 2018 | Head     | 439826   |     |
| Slovakia       | Chickens            | 2018 | 1000Head | 13030    |     |
| Slovakia       | Ducks               | 2018 | 1000Head | 164      |     |
| Slovakia       | Geeseandguineafowls | 2018 | 1000Head |          | 24  |
| Slovakia       | Goats               | 2018 | Head     | 37067    |     |
| Slovakia       | Horses              | 2018 | Head     | 6145     |     |
| Slovakia       | Pigs                | 2018 | Head     | 614384   |     |
| Slovakia       | Rabbitsandhares     | 2018 | 1000Head |          | 991 |
| Slovakia       | Sheep               | 2018 | Head     | 365344   |     |
| Slovakia       | Turkeys             | 2018 | 1000Head | 136      |     |
| Slovenia       | Beehives            | 2018 | No       | 55733    |     |
| Slovenia       | Cattle              | 2018 | Head     | 479614   |     |
| Slovenia       | Chickens            | 2018 | 1000Head | 3866     |     |
| Slovenia       | Ducks               | 2018 | 1000Head | 17       |     |
| Slovenia       | Geeseandguineafowls | 2018 | 1000Head |          | 3   |
| Slovenia       | Goats               | 2018 | Head     | 25217    |     |
| Slovenia       | Horses              | 2018 | Head     | 21917    |     |
| Slovenia       | Pigs                | 2018 | Head     | 257241   |     |
| Slovenia       | Rabbitsandhares     | 2018 | 1000Head |          | 90  |
| Slovenia       | Sheep               | 2018 | Head     | 108761   |     |
| Slovenia       | Turkeys             | 2018 | 1000Head | 148      |     |
| SolomonIslands | Cattle              | 2018 | Head     | 15446    |     |
| SolomonIslands | Chickens            | 2018 | 1000Head |          | 246 |
| SolomonIslands | Horses              | 2018 | Head     | 152      |     |
| SolomonIslands | Pigs                | 2018 | Head     | 54435    |     |
| Somalia        | Asses               | 2018 | Head     | 22778    |     |
| Somalia        | Camels              | 2018 | Head     | 7243771  |     |
| Somalia        | Cattle              | 2018 | Head     | 4749973  |     |
| Somalia        | Chickens            | 2018 | 1000Head | 3693     |     |
| Somalia        | Goats               | 2018 | Head     | 11536738 |     |
| Somalia        | Horses              | 2018 | Head     | 893      |     |
| Somalia        | Mules               | 2018 | Head     | 22141    |     |
| Somalia        | Pigs                | 2018 | Head     | 3745     |     |
| Somalia        | Sheep               | 2018 | Head     | 10649679 |     |
| SouthAfrica    | Asses               | 2018 | Head     | 144908   |     |
| SouthAfrica    | Beehives            | 2018 | No       | 71069    |     |
| SouthAfrica    | Cattle              | 2018 | Head     | 12789515 |     |
| SouthAfrica    | Chickens            | 2018 | 1000Head | 175251   |     |
| SouthAfrica    | Ducks               | 2018 | 1000Head | 413      |     |
| SouthAfrica    | Geeseandguineafowls | 2018 | 1000Head |          | 142 |
| SouthAfrica    | Goats               | 2018 | Head     | 5404600  |     |
| SouthAfrica    | Horses              | 2018 | Head     | 325805   |     |
| SouthAfrica    | Mules               | 2018 | Head     | 15291    |     |
| SouthAfrica    | Pigs                | 2018 | Head     | 1453612  |     |
| SouthAfrica    | Sheep               | 2018 | Head     | 22500072 |     |
| SouthAfrica    | Turkeys             | 2018 | 1000Head | 543      |     |
| SouthSudan     | Asses               | 2018 | Head     | 384470   |     |
| SouthSudan     | Beehives            | 2018 | No       | .        |     |
| SouthSudan     | Camels              | 2018 | Head     | .        |     |
| SouthSudan     | Cattle              | 2018 | Head     | 12074116 |     |

|             |                                   |      |          |          |  |
|-------------|-----------------------------------|------|----------|----------|--|
| SouthSudan  | Chickens                          | 2018 | 1000Head | 15000    |  |
| SouthSudan  | Goats                             | 2018 | Head     | 13547848 |  |
| SouthSudan  | Horses                            | 2018 | Head     | .        |  |
| SouthSudan  | Mules                             | 2018 | Head     | .        |  |
| SouthSudan  | Sheep                             | 2018 | Head     | 16277418 |  |
| Spain       | Asses                             | 2018 | Head     | 140816   |  |
| Spain       | Beehives                          | 2018 | No       | 2965557  |  |
| Spain       | Cattle                            | 2018 | Head     | 6510592  |  |
| Spain       | Chickens                          | 2018 | 1000Head | 137164   |  |
| Spain       | Geeseandguinea <span>fowls</span> | 2018 | 1000Head | 20       |  |
| Spain       | Goats                             | 2018 | Head     | 2764790  |  |
| Spain       | Horses                            | 2018 | Head     | 283159   |  |
| Spain       | Mules                             | 2018 | Head     | 109306   |  |
| Spain       | Pigs                              | 2018 | Head     | 30804102 |  |
| Spain       | Sheep                             | 2018 | Head     | 15852525 |  |
| SriLanka    | Buffaloes                         | 2018 | Head     | 308790   |  |
| SriLanka    | Cattle                            | 2018 | Head     | 1110740  |  |
| SriLanka    | Chickens                          | 2018 | 1000Head | 20531    |  |
| SriLanka    | Ducks                             | 2018 | 1000Head | 12       |  |
| SriLanka    | Goats                             | 2018 | Head     | 314800   |  |
| SriLanka    | Horses                            | 2018 | Head     | 1370     |  |
| SriLanka    | Pigs                              | 2018 | Head     | 97990    |  |
| SriLanka    | Sheep                             | 2018 | Head     | 11382    |  |
| Sudan       | Asses                             | 2018 | Head     | 7608854  |  |
| Sudan       | Beehives                          | 2018 | No       | 76110    |  |
| Sudan       | Camels                            | 2018 | Head     | 4872000  |  |
| Sudan       | Cattle                            | 2018 | Head     | 31223000 |  |
| Sudan       | Chickens                          | 2018 | 1000Head | 49294    |  |
| Sudan       | Goats                             | 2018 | Head     | 31837000 |  |
| Sudan       | Horses                            | 2018 | Head     | 791668   |  |
| Sudan       | Mules                             | 2018 | Head     | 638      |  |
| Sudan       | Sheep                             | 2018 | Head     | 40846000 |  |
| Suriname    | Asses                             | 2018 | Head     | 5        |  |
| Suriname    | Buffaloes                         | 2018 | Head     | 905      |  |
| Suriname    | Cattle                            | 2018 | Head     | 34341    |  |
| Suriname    | Chickens                          | 2018 | 1000Head | 6362     |  |
| Suriname    | Ducks                             | 2018 | 1000Head | 400      |  |
| Suriname    | Goats                             | 2018 | Head     | 3822     |  |
| Suriname    | Horses                            | 2018 | Head     | 254      |  |
| Suriname    | Pigs                              | 2018 | Head     | 32609    |  |
| Suriname    | Sheep                             | 2018 | Head     | 5983     |  |
| Sweden      | Beehives                          | 2018 | No       | 90926    |  |
| Sweden      | Cattle                            | 2018 | Head     | 1435450  |  |
| Sweden      | Chickens                          | 2018 | 1000Head | 9196     |  |
| Sweden      | Horses                            | 2018 | Head     | 102034   |  |
| Sweden      | Pigs                              | 2018 | Head     | 1471200  |  |
| Sweden      | Sheep                             | 2018 | Head     | 360120   |  |
| Sweden      | Turkeys                           | 2018 | 1000Head | 93       |  |
| Switzerland | Asses                             | 2018 | Head     | 34028    |  |
| Switzerland | Beehives                          | 2018 | No       | 179704   |  |
| Switzerland | Cattle                            | 2018 | Head     | 1543345  |  |
| Switzerland | Chickens                          | 2018 | 1000Head | 11535    |  |
| Switzerland | Ducks                             | 2018 | 1000Head | 4        |  |
| Switzerland | Geeseandguinea <span>fowls</span> | 2018 | 1000Head | 3        |  |
| Switzerland | Goats                             | 2018 | Head     | 80552    |  |
| Switzerland | Horses                            | 2018 | Head     | 45906    |  |

|                    |                     |      |          |          |  |  |
|--------------------|---------------------|------|----------|----------|--|--|
| Switzerland        | Mules               | 2018 | Head     | 719      |  |  |
| Switzerland        | Pigs                | 2018 | Head     | 1417549  |  |  |
| Switzerland        | Rabbitsandhares     | 2018 | 1000Head | 62       |  |  |
| Switzerland        | Sheep               | 2018 | Head     | 343470   |  |  |
| Switzerland        | Turkeys             | 2018 | 1000Head | 84       |  |  |
| SyrianArabRepublic | Asses               | 2018 | Head     | 79000    |  |  |
| SyrianArabRepublic | Beehives            | 2018 | No       | 500000   |  |  |
| SyrianArabRepublic | Buffaloes           | 2018 | Head     | 8000     |  |  |
| SyrianArabRepublic | Camels              | 2018 | Head     | 56140    |  |  |
| SyrianArabRepublic | Cattle              | 2018 | Head     | 1090000  |  |  |
| SyrianArabRepublic | Chickens            | 2018 | 1000Head | 16600    |  |  |
| SyrianArabRepublic | Ducks               | 2018 | 1000Head | 47       |  |  |
| SyrianArabRepublic | Geeseandguineafowls | 2018 | 1000Head | 52       |  |  |
| SyrianArabRepublic | Goats               | 2018 | Head     | 2286000  |  |  |
| SyrianArabRepublic | Horses              | 2018 | Head     | 13411    |  |  |
| SyrianArabRepublic | Mules               | 2018 | Head     | 2450     |  |  |
| SyrianArabRepublic | Pigeons,otherbirds  | 2018 | 1000Head | 1346     |  |  |
| SyrianArabRepublic | Pigs                | 2018 | Head     | 13       |  |  |
| SyrianArabRepublic | Rabbitsandhares     | 2018 | 1000Head | 121      |  |  |
| SyrianArabRepublic | Sheep               | 2018 | Head     | 17716882 |  |  |
| SyrianArabRepublic | Turkeys             | 2018 | 1000Head | 191      |  |  |
| Tajikistan         | Asses               | 2018 | Head     | 136676   |  |  |
| Tajikistan         | Beehives            | 2018 | No       | 223262   |  |  |
| Tajikistan         | Buffaloes           | 2018 | Head     | 15351    |  |  |
| Tajikistan         | Camels              | 2018 | Head     | 63       |  |  |
| Tajikistan         | Cattle              | 2018 | Head     | 2327531  |  |  |
| Tajikistan         | Chickens            | 2018 | 1000Head | 6636     |  |  |
| Tajikistan         | Goats               | 2018 | Head     | 1953539  |  |  |
| Tajikistan         | Horses              | 2018 | Head     | 80791    |  |  |
| Tajikistan         | Pigs                | 2018 | Head     | 193      |  |  |
| Tajikistan         | Rabbitsandhares     | 2018 | 1000Head | 79       |  |  |
| Tajikistan         | Sheep               | 2018 | Head     | 3666729  |  |  |
| Thailand           | Asses               | 2018 | Head     | 30       |  |  |
| Thailand           | Buffaloes           | 2018 | Head     | 1258272  |  |  |
| Thailand           | Cattle              | 2018 | Head     | 4656654  |  |  |
| Thailand           | Chickens            | 2018 | 1000Head | 281684   |  |  |
| Thailand           | Ducks               | 2018 | 1000Head | 12373    |  |  |
| Thailand           | Geeseandguineafowls | 2018 | 1000Head | 217      |  |  |
| Thailand           | Goats               | 2018 | Head     | 474812   |  |  |
| Thailand           | Horses              | 2018 | Head     | 6069     |  |  |
| Thailand           | Mules               | 2018 | Head     | 49       |  |  |
| Thailand           | Pigs                | 2018 | Head     | 7908775  |  |  |
| Thailand           | Sheep               | 2018 | Head     | 40681    |  |  |
| Timor-Leste        | Beehives            | 2018 | No       | 20000    |  |  |
| Timor-Leste        | Buffaloes           | 2018 | Head     | 125760   |  |  |
| Timor-Leste        | Cattle              | 2018 | Head     | 209104   |  |  |
| Timor-Leste        | Chickens            | 2018 | 1000Head | 943      |  |  |
| Timor-Leste        | Goats               | 2018 | Head     | 138773   |  |  |
| Timor-Leste        | Horses              | 2018 | Head     | 48466    |  |  |
| Timor-Leste        | Pigs                | 2018 | Head     | 392281   |  |  |
| Timor-Leste        | Sheep               | 2018 | Head     | 47085    |  |  |
| Togo               | Asses               | 2018 | Head     | 3414     |  |  |
| Togo               | Cattle              | 2018 | Head     | 453088   |  |  |
| Togo               | Chickens            | 2018 | 1000Head | 27400    |  |  |
| Togo               | Goats               | 2018 | Head     | 3944963  |  |  |
| Togo               | Horses              | 2018 | Head     | 1855     |  |  |

|                   |                     |      |          |          |          |       |
|-------------------|---------------------|------|----------|----------|----------|-------|
| Togo              | Pigs                | 2018 | Head     | 1057079  |          |       |
| Togo              | Rabbitsandhares     |      | 2018     | 1000Head |          | .     |
| Togo              | Sheep               | 2018 | Head     | 1552087  |          |       |
| Tokelau           | Chickens            |      | 2018     | 1000Head | 5        |       |
| Tokelau           | Pigs                | 2018 | Head     | 1000     |          |       |
| Tonga             | Beehives            | 2018 | No       | 956      |          |       |
| Tonga             | Cattle              | 2018 | Head     | 11933    |          |       |
| Tonga             | Chickens            | 2018 | 1000Head |          | 345      |       |
| Tonga             | Goats               | 2018 | Head     | 13532    |          |       |
| Tonga             | Horses              | 2018 | Head     | 11800    |          |       |
| Tonga             | Pigs                | 2018 | Head     | 82023    |          |       |
| TrinidadandTobago | Asses               |      | 2018     | Head     | 2341     |       |
| TrinidadandTobago | Beehives            |      | 2018     | No       | 7760     |       |
| TrinidadandTobago | Buffaloes           |      | 2018     | Head     | 6145     |       |
| TrinidadandTobago | Cattle              |      | 2018     | Head     | 36303    |       |
| TrinidadandTobago | Chickens            |      | 2018     | 1000Head |          | 37917 |
| TrinidadandTobago | Goats               |      | 2018     | Head     | 8368     |       |
| TrinidadandTobago | Horses              |      | 2018     | Head     | 1426     |       |
| TrinidadandTobago | Mules               |      | 2018     | Head     | 2032     |       |
| TrinidadandTobago | Pigs                |      | 2018     | Head     | 25910    |       |
| TrinidadandTobago | Rabbitsandhares     |      |          | 2018     | 1000Head | 5     |
| TrinidadandTobago | Sheep               |      | 2018     | Head     | 14152    |       |
| Tunisia           | Asses               | 2018 | Head     | 242415   |          |       |
| Tunisia           | Beehives            | 2018 | No       | 682733   |          |       |
| Tunisia           | Camels              | 2018 | Head     | 237150   |          |       |
| Tunisia           | Cattle              | 2018 | Head     | 649690   |          |       |
| Tunisia           | Chickens            | 2018 | 1000Head |          | 92567    |       |
| Tunisia           | Goats               | 2018 | Head     | 1199383  |          |       |
| Tunisia           | Horses              | 2018 | Head     | 57258    |          |       |
| Tunisia           | Mules               | 2018 | Head     | 82674    |          |       |
| Tunisia           | Pigs                | 2018 | Head     | 5419     |          |       |
| Tunisia           | Sheep               | 2018 | Head     | 6494939  |          |       |
| Tunisia           | Turkeys             | 2018 | 1000Head |          | 10267    |       |
| Turkey            | Asses               | 2018 | Head     | 141375   |          |       |
| Turkey            | Beehives            | 2018 | No       | 7947687  |          |       |
| Turkey            | Buffaloes           | 2018 | Head     | 161439   |          |       |
| Turkey            | Camels              | 2018 | Head     | 1703     |          |       |
| Turkey            | Cattle              | 2018 | Head     | 15943586 |          |       |
| Turkey            | Chickens            | 2018 | 1000Head |          | 353561   |       |
| Turkey            | Ducks               | 2018 | 1000Head |          | 533      |       |
| Turkey            | Geeseandguineafowls |      | 2018     | 1000Head |          | 1080  |
| Turkey            | Goats               | 2018 | Head     | 10634672 |          |       |
| Turkey            | Horses              | 2018 | Head     | 114047   |          |       |
| Turkey            | Mules               | 2018 | Head     | 34360    |          |       |
| Turkey            | Pigs                | 2018 | Head     | 1361     |          |       |
| Turkey            | Rabbitsandhares     |      | 2018     | 1000Head |          | 50    |
| Turkey            | Sheep               | 2018 | Head     | 33677636 |          |       |
| Turkey            | Turkeys             | 2018 | 1000Head |          | 4043     |       |
| Turkmenistan      | Asses               | 2018 | Head     | 24882    |          |       |
| Turkmenistan      | Camels              | 2018 | Head     | 123670   |          |       |
| Turkmenistan      | Cattle              | 2018 | Head     | 2217448  |          |       |
| Turkmenistan      | Chickens            | 2018 | 1000Head |          | 16877    |       |
| Turkmenistan      | Goats               | 2018 | Head     | 2371547  |          |       |
| Turkmenistan      | Horses              | 2018 | Head     | 25903    |          |       |
| Turkmenistan      | Pigs                | 2018 | Head     | 9217     |          |       |
| Turkmenistan      | Sheep               | 2018 | Head     | 14074027 |          |       |

|                                        |                                   |      |          |          |  |
|----------------------------------------|-----------------------------------|------|----------|----------|--|
| Turkmenistan                           | Turkeys                           | 2018 | 1000Head | 552      |  |
| Tuvalu                                 | Beehives                          | 2018 | No       | 39       |  |
| Tuvalu                                 | Chickens                          | 2018 | 1000Head | 55       |  |
| Tuvalu                                 | Goats                             | 2018 | Head     | .        |  |
| Tuvalu                                 | Pigs                              | 2018 | Head     | 14434    |  |
| Uganda                                 | Asses                             | 2018 | Head     | 19540    |  |
| Uganda                                 | Beehives                          | 2018 | No       | 81271    |  |
| Uganda                                 | Cattle                            | 2018 | Head     | 15767794 |  |
| Uganda                                 | Chickens                          | 2018 | 1000Head | 37039    |  |
| Uganda                                 | Goats                             | 2018 | Head     | 16196402 |  |
| Uganda                                 | Pigs                              | 2018 | Head     | 2730847  |  |
| Uganda                                 | Sheep                             | 2018 | Head     | 2094426  |  |
| Ukraine                                | Asses                             | 2018 | Head     | 11957    |  |
| Ukraine                                | Beehives                          | 2018 | No       | 2642     |  |
| Ukraine                                | Camels                            | 2018 | Head     | 831      |  |
| Ukraine                                | Cattle                            | 2018 | Head     | 3530800  |  |
| Ukraine                                | Chickens                          | 2018 | 1000Head | 186737   |  |
| Ukraine                                | Ducks                             | 2018 | 1000Head | 10954    |  |
| Ukraine                                | Geeseandguinea <span>fowls</span> | 2018 | 1000Head | 4117     |  |
| Ukraine                                | Goats                             | 2018 | Head     | 582100   |  |
| Ukraine                                | Horses                            | 2018 | Head     | 264900   |  |
| Ukraine                                | Pigs                              | 2018 | Head     | 6109900  |  |
| Ukraine                                | Rabbitsand <span>hares</span>     | 2018 | 1000Head | 4700     |  |
| Ukraine                                | Sheep                             | 2018 | Head     | 727200   |  |
| Ukraine                                | Turkeys                           | 2018 | 1000Head | 1951     |  |
| UnitedArab <span>Emirates</span>       | Camels                            | 2018 | Head     | 457526   |  |
| UnitedArab <span>Emirates</span>       | Cattle                            | 2018 | Head     | 104969   |  |
| UnitedArab <span>Emirates</span>       | Chickens                          | 2018 | 1000Head | 24097    |  |
| UnitedArab <span>Emirates</span>       | Goats                             | 2018 | Head     | 2395166  |  |
| UnitedArab <span>Emirates</span>       | Horses                            | 2018 | Head     | 442      |  |
| UnitedArab <span>Emirates</span>       | Rabbitsand <span>hares</span>     | 2018 | 1000Head | .        |  |
| UnitedArab <span>Emirates</span>       | Sheep                             | 2018 | Head     | 2147665  |  |
| UK                                     | Beehives                          | 2018 | No       | .        |  |
| UK                                     | Cattle                            | 2018 | Head     | 9892000  |  |
| UK                                     | Chickens                          | 2018 | 1000Head | 178000   |  |
| UK                                     | Ducks                             | 2018 | 1000Head | 2084     |  |
| UK                                     | Geeseandguinea <span>fowls</span> | 2018 | 1000Head | 162      |  |
| UK                                     | Goats                             | 2018 | Head     | 104000   |  |
| UK                                     | Horses                            | 2018 | Head     | 419891   |  |
| UK                                     | Pigs                              | 2018 | Head     | 5055000  |  |
| UK                                     | Sheep                             | 2018 | Head     | 33781000 |  |
| UK                                     | Turkeys                           | 2018 | 1000Head | 4100     |  |
| UnitedRepublicof <span>Tanzania</span> | Asses                             | 2018 | Head     | 187651   |  |
| UnitedRepublicof <span>Tanzania</span> | Beehives                          | 2018 | No       | 3019784  |  |
| UnitedRepublicof <span>Tanzania</span> | Cattle                            | 2018 | Head     | 27427658 |  |
| UnitedRepublicof <span>Tanzania</span> | Chickens                          | 2018 | 1000Head | 37963    |  |
| UnitedRepublicof <span>Tanzania</span> | Ducks                             | 2018 | 1000Head | 1359     |  |
| UnitedRepublicof <span>Tanzania</span> | Goats                             | 2018 | Head     | 18385463 |  |
| UnitedRepublicof <span>Tanzania</span> | Pigs                              | 2018 | Head     | 521716   |  |
| UnitedRepublicof <span>Tanzania</span> | Sheep                             | 2018 | Head     | 7782332  |  |
| USA                                    | Asses                             | 2018 | Head     | 51973    |  |
| USA                                    | Beehives                          | 2018 | No       | 2803000  |  |
| USA                                    | Cattle                            | 2018 | Head     | 94298000 |  |
| USA                                    | Chickens                          | 2018 | 1000Head | 1973380  |  |
| USA                                    | Ducks                             | 2018 | 1000Head | 7373     |  |
| USA                                    | Goats                             | 2018 | Head     | 2639000  |  |



|                                 |                                   |      |          |          |  |  |
|---------------------------------|-----------------------------------|------|----------|----------|--|--|
| USA                             | Horses                            | 2018 | Head     | 10479246 |  |  |
| USA                             | Mules                             | 2018 | Head     | 295      |  |  |
| USA                             | Pigs                              | 2018 | Head     | 74550200 |  |  |
| USA                             | Sheep                             | 2018 | Head     | 5265000  |  |  |
| USA                             | Turkeys                           | 2018 | 1000Head | 244750   |  |  |
| UnitedStatesVirginIslands       | Asses                             | 2018 | Head     | 56       |  |  |
| UnitedStatesVirginIslands       | Cattle                            | 2018 | Head     | 8128     |  |  |
| UnitedStatesVirginIslands       | Chickens                          | 2018 | 1000Head | 43       |  |  |
| UnitedStatesVirginIslands       | Goats                             | 2018 | Head     | 4134     |  |  |
| UnitedStatesVirginIslands       | Horses                            | 2018 | Head     | 306      |  |  |
| UnitedStatesVirginIslands       | Mules                             | 2018 | Head     | 4        |  |  |
| UnitedStatesVirginIslands       | Pigs                              | 2018 | Head     | 2667     |  |  |
| UnitedStatesVirginIslands       | Sheep                             | 2018 | Head     | 3264     |  |  |
| Uruguay                         | Asses                             | 2018 | Head     | 1657     |  |  |
| Uruguay                         | Beehives                          | 2018 | No       | 556107   |  |  |
| Uruguay                         | Cattle                            | 2018 | Head     | 11468000 |  |  |
| Uruguay                         | Chickens                          | 2018 | 1000Head | 31678    |  |  |
| Uruguay                         | Ducks                             | 2018 | 1000Head | 204      |  |  |
| Uruguay                         | Geeseandguinea <span>fowls</span> | 2018 | 1000Head | 57       |  |  |
| Uruguay                         | Goats                             | 2018 | Head     | 17936    |  |  |
| Uruguay                         | Horses                            | 2018 | Head     | 408881   |  |  |
| Uruguay                         | Mules                             | 2018 | Head     | 4080     |  |  |
| Uruguay                         | Pigs                              | 2018 | Head     | 130334   |  |  |
| Uruguay                         | Rabbitsand <span>hares</span>     | 2018 | 1000Head | 64       |  |  |
| Uruguay                         | Sheep                             | 2018 | Head     | 6399000  |  |  |
| Uruguay                         | Turkeys                           | 2018 | 1000Head | 134      |  |  |
| Uzbekistan                      | Asses                             | 2018 | Head     | 222975   |  |  |
| Uzbekistan                      | Beehives                          | 2018 | No       | 574153   |  |  |
| Uzbekistan                      | Camels                            | 2018 | Head     | 19426    |  |  |
| Uzbekistan                      | Cattle                            | 2018 | Head     | 12814000 |  |  |
| Uzbekistan                      | Chickens                          | 2018 | 1000Head | 53286    |  |  |
| Uzbekistan                      | Goats                             | 2018 | Head     | 3806000  |  |  |
| Uzbekistan                      | Horses                            | 2018 | Head     | 242470   |  |  |
| Uzbekistan                      | Pigs                              | 2018 | Head     | 58856    |  |  |
| Uzbekistan                      | Rabbitsand <span>hares</span>     | 2018 | 1000Head | 507      |  |  |
| Uzbekistan                      | Sheep                             | 2018 | Head     | 17775000 |  |  |
| Uzbekistan                      | Turkeys                           | 2018 | 1000Head | 666      |  |  |
| Vanuatu                         | Cattle                            | 2018 | Head     | 176738   |  |  |
| Vanuatu                         | Chickens                          | 2018 | 1000Head | 878      |  |  |
| Vanuatu                         | Goats                             | 2018 | Head     | 28137    |  |  |
| Vanuatu                         | Horses                            | 2018 | Head     | 7253     |  |  |
| Vanuatu                         | Pigs                              | 2018 | Head     | 100581   |  |  |
| Venezuela(BolivarianRepublicof) | Asses                             | 2018 | Head     | 440000   |  |  |
| Venezuela(BolivarianRepublicof) | Beehives                          | 2018 | No       | 11269    |  |  |
| Venezuela(BolivarianRepublicof) | Cattle                            | 2018 | Head     | 16960156 |  |  |
| Venezuela(BolivarianRepublicof) | Chickens                          | 2018 | 1000Head | 121811   |  |  |
| Venezuela(BolivarianRepublicof) | Goats                             | 2018 | Head     | 1331166  |  |  |
| Venezuela(BolivarianRepublicof) | Horses                            | 2018 | Head     | 522408   |  |  |
| Venezuela(BolivarianRepublicof) | Mules                             | 2018 | Head     | 72000    |  |  |
| Venezuela(BolivarianRepublicof) | Pigs                              | 2018 | Head     | 3687442  |  |  |
| Venezuela(BolivarianRepublicof) | Rabbitsand <span>hares</span>     | 2018 | 1000Head | 465      |  |  |
| Venezuela(BolivarianRepublicof) | Sheep                             | 2018 | Head     | 610553   |  |  |
| VietNam                         | Beehives                          | 2018 | No       | 283786   |  |  |
| VietNam                         | Buffaloes                         | 2018 | Head     | 2425105  |  |  |
| VietNam                         | Cattle                            | 2018 | Head     | 5802907  |  |  |
| VietNam                         | Chickens                          | 2018 | 1000Head | 316916   |  |  |

```

VietNam    Ducks    2018    1000Head    76911
VietNam    Goats    2018    Head    2683942
VietNam    Horses    2018    Head    53473
VietNam    Pigs    2018    Head    28151948
WallisandFutunaIslands    Beehives    2018    No    643
WallisandFutunaIslands    Cattle    2018    Head    60
WallisandFutunaIslands    Chickens    2018    1000Head    65
WallisandFutunaIslands    Goats    2018    Head    7000
WallisandFutunaIslands    Horses    2018    Head    165
WallisandFutunaIslands    Pigs    2018    Head    25100
WesternSahara    Asses    2018    Head    524
WesternSahara    Camels    2018    Head    111649
WesternSahara    Cattle    2018    Head    .
WesternSahara    Goats    2018    Head    180293
WesternSahara    Sheep    2018    Head    37147
Yemen    Asses    2018    Head    734680
Yemen    Beehives    2018    No    155783
Yemen    Camels    2018    Head    471040
Yemen    Cattle    2018    Head    1792897
Yemen    Chickens    2018    1000Head    66434
Yemen    Goats    2018    Head    9497265
Yemen    Horses    2018    Head    1940
Yemen    Sheep    2018    Head    9661574
Zambia    Asses    2018    Head    2169
Zambia    Beehives    2018    No    61021
Zambia    Cattle    2018    Head    4172422
Zambia    Chickens    2018    1000Head    41024
Zambia    Goats    2018    Head    2823147
Zambia    Pigs    2018    Head    1210397
Zambia    Sheep    2018    Head    261987
Zimbabwe    Asses    2018    Head    585048
Zimbabwe    Cattle    2018    Head    5446674
Zimbabwe    Chickens    2018    1000Head    20149
Zimbabwe    Ducks    2018    1000Head    86
Zimbabwe    Goats    2018    Head    4858342
Zimbabwe    Horses    2018    Head    28256
Zimbabwe    Mules    2018    Head    1251
Zimbabwe    Pigs    2018    Head    267088
Zimbabwe    Sheep    2018    Head    436920
Zimbabwe    Turkeys    2018    1000Head    29

```

```

;
run ;

```

```

proc ;
run ;

```

```

proc ;
run ;
/***** DATA CROP *****/

```

```

data crop;
input country;

```

|                   |                          |      |        |          |  |  |
|-------------------|--------------------------|------|--------|----------|--|--|
| Afghanistan       | Apples                   | 2018 | tonnes | 217192   |  |  |
| Afghanistan       | Barley                   | 2018 | tonnes | 56781    |  |  |
| Afghanistan       | Grapes                   | 2018 | tonnes | 984081   |  |  |
| Afghanistan       | Maize                    | 2018 | tonnes | 106670   |  |  |
| Afghanistan       | Pistachios               | 2018 | tonnes | 2734     |  |  |
| Afghanistan       | Potatoes                 | 2018 | tonnes | 615684   |  |  |
| Afghanistan       | Rice,paddy               | 2018 | tonnes | 352177   |  |  |
| Afghanistan       | Wheat                    | 2018 | tonnes | 3613300  |  |  |
| Albania           | Apples                   | 2018 | tonnes | 108375   |  |  |
| Albania           | Barley                   | 2018 | tonnes | 9655     |  |  |
| Albania           | Grapes                   | 2018 | tonnes | 184832   |  |  |
| Albania           | Maize                    | 2018 | tonnes | 391104   |  |  |
| Albania           | Potatoes                 | 2018 | tonnes | 254543   |  |  |
| Albania           | Pumpkins,squashandgourds | 2018 | tonnes | 18483    |  |  |
| Albania           | Rice,paddy               | 2018 | tonnes | 0        |  |  |
| Albania           | Soybeans                 | 2018 | tonnes | 744      |  |  |
| Albania           | Wheat                    | 2018 | tonnes | 240294   |  |  |
| Algeria           | Apples                   | 2018 | tonnes | 487808   |  |  |
| Algeria           | Barley                   | 2018 | tonnes | 1957327  |  |  |
| Algeria           | Grapes                   | 2018 | tonnes | 502978   |  |  |
| Algeria           | Maize                    | 2018 | tonnes | 4142     |  |  |
| Algeria           | Peas,dry                 | 2018 | tonnes | 11472    |  |  |
| Algeria           | Potatoes                 | 2018 | tonnes | 4653322  |  |  |
| Algeria           | Pumpkins,squashandgourds | 2018 | tonnes | 388875   |  |  |
| Algeria           | Rice,paddy               | 2018 | tonnes | 313      |  |  |
| Algeria           | Wheat                    | 2018 | tonnes | 3981219  |  |  |
| Angola            | Maize                    | 2018 | tonnes | 2271102  |  |  |
| Angola            | Potatoes                 | 2018 | tonnes | 806552   |  |  |
| Angola            | Rice,paddy               | 2018 | tonnes | 56441    |  |  |
| Angola            | Soybeans                 | 2018 | tonnes | 11557    |  |  |
| Angola            | Wheat                    | 2018 | tonnes | 2820     |  |  |
| AntiguaandBarbuda | Maize                    | 2018 | tonnes | 75       |  |  |
| AntiguaandBarbuda | Pumpkins,squashandgourds | 2018 | tonnes | 360      |  |  |
| Argentina         | Apples                   | 2018 | tonnes | 510478   |  |  |
| Argentina         | Barley                   | 2018 | tonnes | 5061069  |  |  |
| Argentina         | Grapes                   | 2018 | tonnes | 2573311  |  |  |
| Argentina         | Maize                    | 2018 | tonnes | 43462323 |  |  |
| Argentina         | Peas,dry                 | 2018 | tonnes | 109736   |  |  |
| Argentina         | Potatoes                 | 2018 | tonnes | 2340103  |  |  |
| Argentina         | Pumpkins,squashandgourds | 2018 | tonnes | 267450   |  |  |
| Argentina         | Rice,paddy               | 2018 | tonnes | 1367968  |  |  |
| Argentina         | Safflowerseed            | 2018 | tonnes | 27839    |  |  |
| Argentina         | Soybeans                 | 2018 | tonnes | 37787927 |  |  |
| Argentina         | Wheat                    | 2018 | tonnes | 18518045 |  |  |
| Armenia           | Apples                   | 2018 | tonnes | 109939   |  |  |
| Armenia           | Barley                   | 2018 | tonnes | 124167   |  |  |
| Armenia           | Grapes                   | 2018 | tonnes | 179668   |  |  |
| Armenia           | Maize                    | 2018 | tonnes | 7615     |  |  |
| Armenia           | Peas,dry                 | 2018 | tonnes | 127      |  |  |
| Armenia           | Potatoes                 | 2018 | tonnes | 415050   |  |  |
| Armenia           | Rice,paddy               | 2018 | tonnes |          |  |  |
| Armenia           | Wheat                    | 2018 | tonnes | 187453   |  |  |
| Australia         | Apples                   | 2018 | tonnes | 268355   |  |  |
| Australia         | Barley                   | 2018 | tonnes | 9253852  |  |  |
| Australia         | Grapes                   | 2018 | tonnes | 1663557  |  |  |
| Australia         | Maize                    | 2018 | tonnes | 387240   |  |  |

|            |                             |      |        |          |  |
|------------|-----------------------------|------|--------|----------|--|
| Australia  | Peas, dry                   | 2018 | tonnes | 317209   |  |
| Australia  | Pistachios                  | 2018 | tonnes | 1529     |  |
| Australia  | Potatoes                    | 2018 | tonnes | 1188655  |  |
| Australia  | Pumpkins, squash and gourds | 2018 | tonnes | 92707    |  |
| Australia  | Rice, paddy                 | 2018 | tonnes | 635113   |  |
| Australia  | Safflower seed              | 2018 | tonnes | 4892     |  |
| Australia  | Soybeans                    | 2018 | tonnes | 63000    |  |
| Australia  | Wheat                       | 2018 | tonnes | 20941134 |  |
| Austria    | Apples                      | 2018 | tonnes | 387954   |  |
| Austria    | Barley                      | 2018 | tonnes | 695072   |  |
| Austria    | Grapes                      | 2018 | tonnes | 367131   |  |
| Austria    | Maize                       | 2018 | tonnes | 2130339  |  |
| Austria    | Peas, dry                   | 2018 | tonnes | 16501    |  |
| Austria    | Potatoes                    | 2018 | tonnes | 697931   |  |
| Austria    | Pumpkins, squash and gourds | 2018 | tonnes | 26966    |  |
| Austria    | Soybeans                    | 2018 | tonnes | 184342   |  |
| Austria    | Wheat                       | 2018 | tonnes | 1370960  |  |
| Azerbaijan | Apples                      | 2018 | tonnes | 277158   |  |
| Azerbaijan | Barley                      | 2018 | tonnes | 916036   |  |
| Azerbaijan | Grapes                      | 2018 | tonnes | 167591   |  |
| Azerbaijan | Maize                       | 2018 | tonnes | 247939   |  |
| Azerbaijan | Peas, dry                   | 2018 | tonnes | 26632    |  |
| Azerbaijan | Pistachios                  | 2018 | tonnes | 22       |  |
| Azerbaijan | Potatoes                    | 2018 | tonnes | 898914   |  |
| Azerbaijan | Pumpkins, squash and gourds | 2018 | tonnes | 27930    |  |
| Azerbaijan | Rice, paddy                 | 2018 | tonnes | 11975    |  |
| Azerbaijan | Soybeans                    | 2018 | tonnes | 41       |  |
| Azerbaijan | Wheat                       | 2018 | tonnes | 1991683  |  |
| Bahamas    | Maize                       | 2018 | tonnes | 742      |  |
| Bahamas    | Potatoes                    | 2018 | tonnes |          |  |
| Bahamas    | Pumpkins, squash and gourds | 2018 | tonnes | 2103     |  |
| Bahrain    | Grapes                      | 2018 | tonnes | 151      |  |
| Bahrain    | Potatoes                    | 2018 | tonnes | 68       |  |
| Bahrain    | Pumpkins, squash and gourds | 2018 | tonnes | 537      |  |
| Bangladesh | Barley                      | 2018 | tonnes | 244      |  |
| Bangladesh | Maize                       | 2018 | tonnes | 3288102  |  |
| Bangladesh | Peas, dry                   | 2018 | tonnes | 17429    |  |
| Bangladesh | Potatoes                    | 2018 | tonnes | 9744412  |  |
| Bangladesh | Pumpkins, squash and gourds | 2018 | tonnes | 303073   |  |
| Bangladesh | Rice, paddy                 | 2018 | tonnes | 56417319 |  |
| Bangladesh | Soybeans                    | 2018 | tonnes | 98699    |  |
| Bangladesh | Wheat                       | 2018 | tonnes | 1099373  |  |
| Barbados   | Maize                       | 2018 | tonnes | 109      |  |
| Barbados   | Pumpkins, squash and gourds | 2018 | tonnes | 792      |  |
| Belarus    | Apples                      | 2018 | tonnes | 700198   |  |
| Belarus    | Barley                      | 2018 | tonnes | 944341   |  |
| Belarus    | Grapes                      | 2018 | tonnes | 15233    |  |
| Belarus    | Maize                       | 2018 | tonnes | 1137932  |  |
| Belarus    | Peas, dry                   | 2018 | tonnes | 57998    |  |
| Belarus    | Potatoes                    | 2018 | tonnes | 5865123  |  |
| Belarus    | Wheat                       | 2018 | tonnes | 1814765  |  |
| Belgium    | Apples                      | 2018 | tonnes | 273950   |  |
| Belgium    | Barley                      | 2018 | tonnes | 320395   |  |
| Belgium    | Grapes                      | 2018 | tonnes | 2881     |  |
| Belgium    | Maize                       | 2018 | tonnes | 442995   |  |
| Belgium    | Peas, dry                   | 2018 | tonnes | 2555     |  |

|                      |                          |      |        |           |         |
|----------------------|--------------------------|------|--------|-----------|---------|
| Belgium              | Potatoes                 | 2018 | tonnes | 3045443   |         |
| Belgium              | Pumpkins,squashandgourds | 2018 | tonnes |           | 9200    |
| Belgium              | Wheat                    | 2018 | tonnes | 1652249   |         |
| Belize               | Maize                    | 2018 | tonnes | 77766     |         |
| Belize               | Peas,dry                 | 2018 | tonnes | 1545      |         |
| Belize               | Potatoes                 | 2018 | tonnes | 1540      |         |
| Belize               | Pumpkins,squashandgourds | 2018 | tonnes |           | 134     |
| Belize               | Rice,paddy               | 2018 | tonnes | 13375     |         |
| Belize               | Soybeans                 | 2018 | tonnes | 11776     |         |
| Benin                | Maize                    | 2018 | tonnes | 1509758   |         |
| Benin                | Potatoes                 | 2018 | tonnes | 60        |         |
| Benin                | Rice,paddy               | 2018 | tonnes | 459313    |         |
| Benin                | Soybeans                 | 2018 | tonnes | 221977    |         |
| Bermuda              | Potatoes                 | 2018 | tonnes | 925       |         |
| Bhutan               | Apples                   | 2018 | tonnes | 8632      |         |
| Bhutan               | Barley                   | 2018 | tonnes | 1994      |         |
| Bhutan               | Maize                    | 2018 | tonnes | 92949     |         |
| Bhutan               | Peas,dry                 | 2018 | tonnes | 890       |         |
| Bhutan               | Potatoes                 | 2018 | tonnes | 56792     |         |
| Bhutan               | Pumpkins,squashandgourds | 2018 | tonnes |           | 5898    |
| Bhutan               | Rice,paddy               | 2018 | tonnes | 88753     |         |
| Bhutan               | Soybeans                 | 2018 | tonnes | 226       |         |
| Bhutan               | Wheat                    | 2018 | tonnes | 4141      |         |
| Bolivia              | Apples                   | 2018 | tonnes | 2805      |         |
| Bolivia              | Barley                   | 2018 | tonnes | 46620     |         |
| Bolivia              | Grapes                   | 2018 | tonnes | 22674     |         |
| Bolivia              | Maize                    | 2018 | tonnes | 1260926   |         |
| Bolivia              | Peas,dry                 | 2018 | tonnes | 4486      |         |
| Bolivia              | Potatoes                 | 2018 | tonnes | 1160940   |         |
| Bolivia              | Pumpkins,squashandgourds | 2018 | tonnes |           | 24629   |
| Bolivia              | Rice,paddy               | 2018 | tonnes | 541157    |         |
| Bolivia              | Soybeans                 | 2018 | tonnes | 2942131   |         |
| Bolivia              | Wheat                    | 2018 | tonnes | 301689    |         |
| BosniaandHerzegovina | Apples                   | 2018 | tonnes |           | 112513  |
| BosniaandHerzegovina | Barley                   | 2018 | tonnes |           | 79060   |
| BosniaandHerzegovina | Grapes                   | 2018 | tonnes |           | 40408   |
| BosniaandHerzegovina | Maize                    | 2018 | tonnes |           | 1272339 |
| BosniaandHerzegovina | Peas,dry                 | 2018 | tonnes |           | 1617    |
| BosniaandHerzegovina | Potatoes                 | 2018 | tonnes |           | 394274  |
| BosniaandHerzegovina | Soybeans                 | 2018 | tonnes |           | 23332   |
| BosniaandHerzegovina | Wheat                    | 2018 | tonnes |           | 295810  |
| Botswana             | Maize                    | 2018 | tonnes | 13126     |         |
| Botswana             | Wheat                    | 2018 | tonnes |           |         |
| Brazil               | Apples                   | 2018 | tonnes | 1195007   |         |
| Brazil               | Barley                   | 2018 | tonnes | 330374    |         |
| Brazil               | Grapes                   | 2018 | tonnes | 1591986   |         |
| Brazil               | Maize                    | 2018 | tonnes | 82288298  |         |
| Brazil               | Peas,dry                 | 2018 | tonnes | 2813      |         |
| Brazil               | Potatoes                 | 2018 | tonnes | 3688029   |         |
| Brazil               | Rice,paddy               | 2018 | tonnes | 11749192  |         |
| Brazil               | Soybeans                 | 2018 | tonnes | 117887672 |         |
| Brazil               | Wheat                    | 2018 | tonnes | 5418711   |         |
| BruneiDarussalam     | Pumpkins,squashandgourds | 2018 | tonnes |           | 639     |
| BruneiDarussalam     | Rice,paddy               | 2018 | tonnes | 1569      |         |
| Bulgaria             | Apples                   | 2018 | tonnes | 50298     |         |
| Bulgaria             | Barley                   | 2018 | tonnes | 437507    |         |

|                        |                          |      |        |          |        |       |
|------------------------|--------------------------|------|--------|----------|--------|-------|
| Bulgaria               | Grapes                   | 2018 | tonnes | 195470   |        |       |
| Bulgaria               | Maize                    | 2018 | tonnes | 3478013  |        |       |
| Bulgaria               | Peas,dry                 | 2018 | tonnes | 53900    |        |       |
| Bulgaria               | Potatoes                 | 2018 | tonnes | 261594   |        |       |
| Bulgaria               | Pumpkins,squashandgourds | 2018 | tonnes |          | 26339  |       |
| Bulgaria               | Rice,paddy               | 2018 | tonnes | 63415    |        |       |
| Bulgaria               | Soybeans                 | 2018 | tonnes | 4548     |        |       |
| Bulgaria               | Wheat                    | 2018 | tonnes | 5832449  |        |       |
| BurkinaFaso            | Maize                    | 2018 | tonnes | 1700127  |        |       |
| BurkinaFaso            | Potatoes                 | 2018 | tonnes | 1416     |        |       |
| BurkinaFaso            | Rice,paddy               | 2018 | tonnes | 160949   |        |       |
| BurkinaFaso            | Soybeans                 | 2018 | tonnes | 31314    |        |       |
| Burundi                | Maize                    | 2018 | tonnes | 290498   |        |       |
| Burundi                | Peas,dry                 | 2018 | tonnes | 4919     |        |       |
| Burundi                | Potatoes                 | 2018 | tonnes | 302665   |        |       |
| Burundi                | Rice,paddy               | 2018 | tonnes | 55671    |        |       |
| Burundi                | Soybeans                 | 2018 | tonnes | 2387     |        |       |
| Burundi                | Wheat                    | 2018 | tonnes | 22751    |        |       |
| CaboVerde              | Maize                    | 2018 | tonnes | 3893     |        |       |
| CaboVerde              | Potatoes                 | 2018 | tonnes | 2200     |        |       |
| CaboVerde              | Pumpkins,squashandgourds | 2018 | tonnes |          | 0      |       |
| Cambodia               | Maize                    | 2018 | tonnes | 604333   |        |       |
| Cambodia               | Rice,paddy               | 2018 | tonnes | 10647212 |        |       |
| Cambodia               | Soybeans                 | 2018 | tonnes | 170000   |        |       |
| Cameroon               | Maize                    | 2018 | tonnes | 2344665  |        |       |
| Cameroon               | Pistachios               | 2018 | tonnes |          |        |       |
| Cameroon               | Potatoes                 | 2018 | tonnes | 302706   |        |       |
| Cameroon               | Pumpkins,squashandgourds | 2018 | tonnes |          | 203748 |       |
| Cameroon               | Rice,paddy               | 2018 | tonnes | 332534   |        |       |
| Cameroon               | Soybeans                 | 2018 | tonnes | 20824    |        |       |
| Cameroon               | Wheat                    | 2018 | tonnes | 938      |        |       |
| Canada                 | Apples                   | 2018 | tonnes | 424709   |        |       |
| Canada                 | Barley                   | 2018 | tonnes | 8379700  |        |       |
| Canada                 | Grapes                   | 2018 | tonnes | 120293   |        |       |
| Canada                 | Maize                    | 2018 | tonnes | 13884800 |        |       |
| Canada                 | Peas,dry                 | 2018 | tonnes | 3580700  |        |       |
| Canada                 | Potatoes                 | 2018 | tonnes | 5790838  |        |       |
| Canada                 | Pumpkins,squashandgourds | 2018 | tonnes |          | 132061 |       |
| Canada                 | Safflowerseed            | 2018 | tonnes |          |        |       |
| Canada                 | Soybeans                 | 2018 | tonnes | 7266600  |        |       |
| Canada                 | Wheat                    | 2018 | tonnes | 31769200 |        |       |
| CaymanIslands          | Pumpkins,squashandgourds | 2018 | tonnes |          | 41     |       |
| CentralAfricanRepublic | Maize                    | 2018 | tonnes | 86976    |        |       |
| CentralAfricanRepublic | Potatoes                 | 2018 | tonnes | 1448     |        |       |
| CentralAfricanRepublic | Pumpkins,squashandgourds | 2018 | tonnes |          |        | 20433 |
| CentralAfricanRepublic | Rice,paddy               | 2018 | tonnes | 11108    |        |       |
| Chad                   | Maize                    | 2018 | tonnes | 437898   |        |       |
| Chad                   | Potatoes                 | 2018 | tonnes | 41583    |        |       |
| Chad                   | Rice,paddy               | 2018 | tonnes | 259540   |        |       |
| Chad                   | Wheat                    | 2018 | tonnes | 1798     |        |       |
| Chile                  | Apples                   | 2018 | tonnes | 1727277  |        |       |
| Chile                  | Barley                   | 2018 | tonnes | 170652   |        |       |
| Chile                  | Grapes                   | 2018 | tonnes | 2500000  |        |       |
| Chile                  | Maize                    | 2018 | tonnes | 1110608  |        |       |
| Chile                  | Peas,dry                 | 2018 | tonnes | 862      |        |       |
| Chile                  | Potatoes                 | 2018 | tonnes | 1183357  |        |       |

|                        |                          |      |        |           |  |
|------------------------|--------------------------|------|--------|-----------|--|
| Chile                  | Pumpkins,squashandgourds | 2018 | tonnes | 91937     |  |
| Chile                  | Rice,paddy               | 2018 | tonnes | 192808    |  |
| Chile                  | Soybeans                 | 2018 | tonnes |           |  |
| Chile                  | Wheat                    | 2018 | tonnes | 1469003   |  |
| China                  | Apples                   | 2018 | tonnes | 39235019  |  |
| China                  | Barley                   | 2018 | tonnes | 1487906   |  |
| China                  | Grapes                   | 2018 | tonnes | 13494811  |  |
| China                  | Maize                    | 2018 | tonnes | 257348659 |  |
| China                  | Peas,dry                 | 2018 | tonnes | 1525476   |  |
| China                  | Pistachios               | 2018 | tonnes | 74828     |  |
| China                  | Potatoes                 | 2018 | tonnes | 90321442  |  |
| China                  | Pumpkins,squashandgourds | 2018 | tonnes | 8186851   |  |
| China                  | Rice,paddy               | 2018 | tonnes | 214078796 |  |
| China                  | Safflowerseed            | 2018 | tonnes | 32950     |  |
| China                  | Soybeans                 | 2018 | tonnes | 14193621  |  |
| China                  | Wheat                    | 2018 | tonnes | 131447224 |  |
| HongKong               | Pumpkins,squashandgourds | 2018 | tonnes | 249       |  |
| HongKong               | Rice,paddy               | 2018 | tonnes | 0         |  |
| China,mainland         | Apples                   | 2018 | tonnes | 39233400  |  |
| China,mainland         | Barley                   | 2018 | tonnes | 1487906   |  |
| China,mainland         | Grapes                   | 2018 | tonnes | 13397012  |  |
| China,mainland         | Maize                    | 2018 | tonnes | 257173900 |  |
| China,mainland         | Peas,dry                 | 2018 | tonnes | 1525476   |  |
| China,mainland         | Pistachios               | 2018 | tonnes | 74828     |  |
| China,mainland         | Potatoes                 | 2018 | tonnes | 90259155  |  |
| China,mainland         | Pumpkins,squashandgourds | 2018 | tonnes | 8133734   |  |
| China,mainland         | Rice,paddy               | 2018 | tonnes | 212129000 |  |
| China,mainland         | Safflowerseed            | 2018 | tonnes | 32950     |  |
| China,mainland         | Soybeans                 | 2018 | tonnes | 14189217  |  |
| China,mainland         | Wheat                    | 2018 | tonnes | 131440500 |  |
| China,TaiwanProvinceof | Apples                   | 2018 | tonnes | 1619      |  |
| China,TaiwanProvinceof | Barley                   | 2018 | tonnes |           |  |
| China,TaiwanProvinceof | Grapes                   | 2018 | tonnes | 97799     |  |
| China,TaiwanProvinceof | Maize                    | 2018 | tonnes | 174759    |  |
| China,TaiwanProvinceof | Potatoes                 | 2018 | tonnes | 62287     |  |
| China,TaiwanProvinceof | Pumpkins,squashandgourds | 2018 | tonnes | 52868     |  |
| China,TaiwanProvinceof | Rice,paddy               | 2018 | tonnes | 1949796   |  |
| China,TaiwanProvinceof | Soybeans                 | 2018 | tonnes | 4404      |  |
| China,TaiwanProvinceof | Wheat                    | 2018 | tonnes | 6724      |  |
| Colombia               | Apples                   | 2018 | tonnes | 2368      |  |
| Colombia               | Barley                   | 2018 | tonnes | 11001     |  |
| Colombia               | Grapes                   | 2018 | tonnes | 24844     |  |
| Colombia               | Maize                    | 2018 | tonnes | 1388246   |  |
| Colombia               | Peas,dry                 | 2018 | tonnes | 59718     |  |
| Colombia               | Potatoes                 | 2018 | tonnes | 3107580   |  |
| Colombia               | Pumpkins,squashandgourds | 2018 | tonnes | 79839     |  |
| Colombia               | Rice,paddy               | 2018 | tonnes | 3322937   |  |
| Colombia               | Soybeans                 | 2018 | tonnes | 77000     |  |
| Colombia               | Wheat                    | 2018 | tonnes | 11139     |  |
| Comoros                | Maize                    | 2018 | tonnes | 7014      |  |
| Comoros                | Potatoes                 | 2018 | tonnes | 600       |  |
| Comoros                | Rice,paddy               | 2018 | tonnes | 31340     |  |
| Congo                  | Maize                    | 2018 | tonnes | 11928     |  |
| Congo                  | Peas,dry                 | 2018 | tonnes | 6879      |  |
| Congo                  | Potatoes                 | 2018 | tonnes | 5900      |  |
| Congo                  | Rice,paddy               | 2018 | tonnes | 1196      |  |

|               |                          |      |        |         |        |
|---------------|--------------------------|------|--------|---------|--------|
| CostaRica     | Maize                    | 2018 | tonnes | 5358    |        |
| CostaRica     | Potatoes                 | 2018 | tonnes | 93567   |        |
| CostaRica     | Rice,paddy               | 2018 | tonnes | 158311  |        |
| CostaRica     | Soybeans                 | 2018 | tonnes |         |        |
| Cote d'Ivoire | Maize                    | 2018 | tonnes | 1006000 |        |
| Cote d'Ivoire | Pistachios               | 2018 | tonnes |         |        |
| Cote d'Ivoire | Potatoes                 | 2018 | tonnes |         |        |
| Cote d'Ivoire | Pumpkins,squashandgourds | 2018 | tonnes |         | 19372  |
| Cote d'Ivoire | Rice,paddy               | 2018 | tonnes | 2109333 |        |
| Cote d'Ivoire | Soybeans                 | 2018 | tonnes | 606     |        |
| Croatia       | Apples                   | 2018 | tonnes | 93467   |        |
| Croatia       | Barley                   | 2018 | tonnes | 227520  |        |
| Croatia       | Grapes                   | 2018 | tonnes | 146242  |        |
| Croatia       | Maize                    | 2018 | tonnes | 2147275 |        |
| Croatia       | Peas,dry                 | 2018 | tonnes | 314     |        |
| Croatia       | Potatoes                 | 2018 | tonnes | 182261  |        |
| Croatia       | Soybeans                 | 2018 | tonnes | 245188  |        |
| Croatia       | Wheat                    | 2018 | tonnes | 744405  |        |
| Cuba          | Grapes                   | 2018 | tonnes | 21982   |        |
| Cuba          | Maize                    | 2018 | tonnes | 345909  |        |
| Cuba          | Potatoes                 | 2018 | tonnes | 135147  |        |
| Cuba          | Pumpkins,squashandgourds | 2018 | tonnes |         | 452264 |
| Cuba          | Rice,paddy               | 2018 | tonnes | 460870  |        |
| Cyprus        | Apples                   | 2018 | tonnes | 3772    |        |
| Cyprus        | Barley                   | 2018 | tonnes | 18679   |        |
| Cyprus        | Grapes                   | 2018 | tonnes | 23454   |        |
| Cyprus        | Pistachios               | 2018 | tonnes | 10      |        |
| Cyprus        | Potatoes                 | 2018 | tonnes | 106452  |        |
| Cyprus        | Pumpkins,squashandgourds | 2018 | tonnes |         | 2601   |
| Cyprus        | Wheat                    | 2018 | tonnes | 18054   |        |
| Czechia       | Apples                   | 2018 | tonnes | 151528  |        |
| Czechia       | Barley                   | 2018 | tonnes | 1606034 |        |
| Czechia       | Grapes                   | 2018 | tonnes | 103704  |        |
| Czechia       | Maize                    | 2018 | tonnes | 489154  |        |
| Czechia       | Peas,dry                 | 2018 | tonnes | 70564   |        |
| Czechia       | Potatoes                 | 2018 | tonnes | 583560  |        |
| Czechia       | Soybeans                 | 2018 | tonnes | 25259   |        |
| Czechia       | Wheat                    | 2018 | tonnes | 4417841 |        |
| Nkorea        | Apples                   | 2018 | tonnes | 813064  |        |
| Nkorea        | Barley                   | 2018 | tonnes | 22000   |        |
| Nkorea        | Maize                    | 2018 | tonnes | 1876000 |        |
| Nkorea        | Potatoes                 | 2018 | tonnes | 2500000 |        |
| Nkorea        | Pumpkins,squashandgourds | 2018 | tonnes |         | 71095  |
| Nkorea        | Rice,paddy               | 2018 | tonnes | 2088000 |        |
| Nkorea        | Soybeans                 | 2018 | tonnes | 135000  |        |
| Nkorea        | Wheat                    | 2018 | tonnes | 35000   |        |
| Congo         | Barley                   | 2018 | tonnes | 1085    |        |
| Congo         | Maize                    | 2018 | tonnes | 2078352 |        |
| Congo         | Peas,dry                 | 2018 | tonnes | 1397    |        |
| Congo         | Potatoes                 | 2018 | tonnes | 101398  |        |
| Congo         | Pumpkins,squashandgourds | 2018 | tonnes |         | 30806  |
| Congo         | Rice,paddy               | 2018 | tonnes | 990139  |        |
| Congo         | Soybeans                 | 2018 | tonnes | 25772   |        |
| Congo         | Wheat                    | 2018 | tonnes | 6309    |        |
| Denmark       | Apples                   | 2018 | tonnes | 32645   |        |
| Denmark       | Barley                   | 2018 | tonnes | 3485656 |        |



|            |                          |      |        |         |        |  |
|------------|--------------------------|------|--------|---------|--------|--|
| Denmark    | Maize                    | 2018 | tonnes | 35923   |        |  |
| Denmark    | Peas,dry                 | 2018 | tonnes | 20434   |        |  |
| Denmark    | Potatoes                 | 2018 | tonnes | 1806766 |        |  |
| Denmark    | Pumpkins,squashandgourds | 2018 | tonnes |         | 0      |  |
| Denmark    | Wheat                    | 2018 | tonnes | 2654819 |        |  |
| Djibouti   | Maize                    | 2018 | tonnes | 18      |        |  |
| Djibouti   | Pumpkins,squashandgourds | 2018 | tonnes |         | 17     |  |
| Dominica   | Maize                    | 2018 | tonnes | 191     |        |  |
| Dominica   | Potatoes                 | 2018 | tonnes | 136     |        |  |
| Dominica   | Pumpkins,squashandgourds | 2018 | tonnes |         | 937    |  |
| DominicR   | Maize                    | 2018 | tonnes | 44590   |        |  |
| DominicR   | Peas,dry                 | 2018 | tonnes | 488     |        |  |
| DominicR   | Potatoes                 | 2018 | tonnes | 88557   |        |  |
| DominicR   | Pumpkins,squashandgourds | 2018 | tonnes |         | 40158  |  |
| DominicR   | Rice,paddy               | 2018 | tonnes | 627362  |        |  |
| Ecuador    | Apples                   | 2018 | tonnes | 6970    |        |  |
| Ecuador    | Barley                   | 2018 | tonnes | 13674   |        |  |
| Ecuador    | Grapes                   | 2018 | tonnes | 519     |        |  |
| Ecuador    | Maize                    | 2018 | tonnes | 1324147 |        |  |
| Ecuador    | Peas,dry                 | 2018 | tonnes | 592     |        |  |
| Ecuador    | Potatoes                 | 2018 | tonnes | 269201  |        |  |
| Ecuador    | Pumpkins,squashandgourds | 2018 | tonnes |         | 4127   |  |
| Ecuador    | Rice,paddy               | 2018 | tonnes | 1350093 |        |  |
| Ecuador    | Soybeans                 | 2018 | tonnes | 25504   |        |  |
| Ecuador    | Wheat                    | 2018 | tonnes | 5398    |        |  |
| Egypt      | Apples                   | 2018 | tonnes | 704727  |        |  |
| Egypt      | Barley                   | 2018 | tonnes | 113838  |        |  |
| Egypt      | Grapes                   | 2018 | tonnes | 1759472 |        |  |
| Egypt      | Maize                    | 2018 | tonnes | 7300000 |        |  |
| Egypt      | Peas,dry                 | 2018 | tonnes | 451     |        |  |
| Egypt      | Potatoes                 | 2018 | tonnes | 4896476 |        |  |
| Egypt      | Pumpkins,squashandgourds | 2018 | tonnes |         | 477283 |  |
| Egypt      | Rice,paddy               | 2018 | tonnes | 4900000 |        |  |
| Egypt      | Soybeans                 | 2018 | tonnes | 48000   |        |  |
| Egypt      | Wheat                    | 2018 | tonnes | 8800000 |        |  |
| ElSalvador | Apples                   | 2018 | tonnes | 34960   |        |  |
| ElSalvador | Maize                    | 2018 | tonnes | 685509  |        |  |
| ElSalvador | Potatoes                 | 2018 | tonnes | 10597   |        |  |
| ElSalvador | Pumpkins,squashandgourds | 2018 | tonnes |         | 8498   |  |
| ElSalvador | Rice,paddy               | 2018 | tonnes | 22764   |        |  |
| ElSalvador | Soybeans                 | 2018 | tonnes | 5694    |        |  |
| Eritrea    | Barley                   | 2018 | tonnes | 68268   |        |  |
| Eritrea    | Maize                    | 2018 | tonnes | 19914   |        |  |
| Eritrea    | Peas,dry                 | 2018 | tonnes | 734     |        |  |
| Eritrea    | Potatoes                 | 2018 | tonnes | 135     |        |  |
| Eritrea    | Wheat                    | 2018 | tonnes | 28939   |        |  |
| Estonia    | Apples                   | 2018 | tonnes | 3657    |        |  |
| Estonia    | Barley                   | 2018 | tonnes | 347497  |        |  |
| Estonia    | Grapes                   | 2018 | tonnes |         |        |  |
| Estonia    | Peas,dry                 | 2018 | tonnes | 53652   |        |  |
| Estonia    | Potatoes                 | 2018 | tonnes | 88434   |        |  |
| Estonia    | Wheat                    | 2018 | tonnes | 450265  |        |  |
| Eswatini   | Maize                    | 2018 | tonnes | 91247   |        |  |
| Eswatini   | Potatoes                 | 2018 | tonnes | 8520    |        |  |
| Eswatini   | Rice,paddy               | 2018 | tonnes | 83      |        |  |
| Eswatini   | Wheat                    | 2018 | tonnes | 713     |        |  |

|                 |                          |      |        |          |  |  |
|-----------------|--------------------------|------|--------|----------|--|--|
| Ethiopia        | Barley                   | 2018 | tonnes | 2101375  |  |  |
| Ethiopia        | Grapes                   | 2018 | tonnes | 3971     |  |  |
| Ethiopia        | Maize                    | 2018 | tonnes | 7360201  |  |  |
| Ethiopia        | Peas,dry                 | 2018 | tonnes | 374588   |  |  |
| Ethiopia        | Potatoes                 | 2018 | tonnes | 743153   |  |  |
| Ethiopia        | Rice,paddy               | 2018 | tonnes | 144200   |  |  |
| Ethiopia        | Safflowerseed            | 2018 | tonnes | 9184     |  |  |
| Ethiopia        | Soybeans                 | 2018 | tonnes | 98000    |  |  |
| Ethiopia        | Wheat                    | 2018 | tonnes | 4238836  |  |  |
| FaroeIslands    | Potatoes                 | 2018 | tonnes | 1472     |  |  |
| Fiji            | Maize                    | 2018 | tonnes | 1208     |  |  |
| Fiji            | Potatoes                 | 2018 | tonnes | 24       |  |  |
| Fiji            | Pumpkins,squashandgourds | 2018 | tonnes | 2132     |  |  |
| Fiji            | Rice,paddy               | 2018 | tonnes | 7051     |  |  |
| Finland         | Apples                   | 2018 | tonnes | 7196     |  |  |
| Finland         | Barley                   | 2018 | tonnes | 1336100  |  |  |
| Finland         | Peas,dry                 | 2018 | tonnes | 20100    |  |  |
| Finland         | Potatoes                 | 2018 | tonnes | 600300   |  |  |
| Finland         | Pumpkins,squashandgourds | 2018 | tonnes | 2343     |  |  |
| Finland         | Wheat                    | 2018 | tonnes | 494700   |  |  |
| France          | Apples                   | 2018 | tonnes | 1737412  |  |  |
| France          | Barley                   | 2018 | tonnes | 11193034 |  |  |
| France          | Grapes                   | 2018 | tonnes | 6198323  |  |  |
| France          | Maize                    | 2018 | tonnes | 12667393 |  |  |
| France          | Peas,dry                 | 2018 | tonnes | 615708   |  |  |
| France          | Potatoes                 | 2018 | tonnes | 7870973  |  |  |
| France          | Pumpkins,squashandgourds | 2018 | tonnes | 96042    |  |  |
| France          | Rice,paddy               | 2018 | tonnes | 73306    |  |  |
| France          | Soybeans                 | 2018 | tonnes | 400292   |  |  |
| France          | Wheat                    | 2018 | tonnes | 35798234 |  |  |
| FrenchGuyana    | Maize                    | 2018 | tonnes | 417      |  |  |
| FrenchGuyana    | Pumpkins,squashandgourds | 2018 | tonnes | 760      |  |  |
| FrenchGuyana    | Rice,paddy               | 2018 | tonnes | 2853     |  |  |
| FrenchGuyana    | Soybeans                 | 2018 | tonnes |          |  |  |
| FrenchPolynesia | Potatoes                 | 2018 | tonnes | 579      |  |  |
| FrenchPolynesia | Pumpkins,squashandgourds | 2018 | tonnes | 108      |  |  |
| Gabon           | Maize                    | 2018 | tonnes | 46006    |  |  |
| Gabon           | Rice,paddy               | 2018 | tonnes | 1830     |  |  |
| Gabon           | Soybeans                 | 2018 | tonnes | 4057     |  |  |
| Gambia          | Maize                    | 2018 | tonnes | 39383    |  |  |
| Gambia          | Rice,paddy               | 2018 | tonnes | 53809    |  |  |
| Georgia         | Apples                   | 2018 | tonnes | 82700    |  |  |
| Georgia         | Barley                   | 2018 | tonnes | 57700    |  |  |
| Georgia         | Grapes                   | 2018 | tonnes | 259900   |  |  |
| Georgia         | Maize                    | 2018 | tonnes | 194200   |  |  |
| Georgia         | Peas,dry                 | 2018 | tonnes | 112      |  |  |
| Georgia         | Potatoes                 | 2018 | tonnes | 237500   |  |  |
| Georgia         | Soybeans                 | 2018 | tonnes | 2000     |  |  |
| Georgia         | Wheat                    | 2018 | tonnes | 107100   |  |  |
| Germany         | Apples                   | 2018 | tonnes | 1198517  |  |  |
| Germany         | Barley                   | 2018 | tonnes | 9583600  |  |  |
| Germany         | Grapes                   | 2018 | tonnes | 1403597  |  |  |
| Germany         | Maize                    | 2018 | tonnes | 3344000  |  |  |
| Germany         | Peas,dry                 | 2018 | tonnes | 197100   |  |  |
| Germany         | Potatoes                 | 2018 | tonnes | 8920800  |  |  |
| Germany         | Pumpkins,squashandgourds | 2018 | tonnes | 122241   |  |  |

|               |                          |      |        |          |        |  |
|---------------|--------------------------|------|--------|----------|--------|--|
| Germany       | Soybeans                 | 2018 | tonnes | 59000    |        |  |
| Germany       | Wheat                    | 2018 | tonnes | 20263500 |        |  |
| Ghana         | Maize                    | 2018 | tonnes | 2306384  |        |  |
| Ghana         | Rice,paddy               | 2018 | tonnes | 769401   |        |  |
| Ghana         | Soybeans                 | 2018 | tonnes | 152023   |        |  |
| Greece        | Apples                   | 2018 | tonnes | 285000   |        |  |
| Greece        | Barley                   | 2018 | tonnes | 344610   |        |  |
| Greece        | Grapes                   | 2018 | tonnes | 933150   |        |  |
| Greece        | Maize                    | 2018 | tonnes | 1205980  |        |  |
| Greece        | Peas,dry                 | 2018 | tonnes | 504      |        |  |
| Greece        | Pistachios               | 2018 | tonnes | 8558     |        |  |
| Greece        | Potatoes                 | 2018 | tonnes | 465770   |        |  |
| Greece        | Pumpkins,squashandgourds | 2018 | tonnes |          | 879    |  |
| Greece        | Rice,paddy               | 2018 | tonnes | 222690   |        |  |
| Greece        | Soybeans                 | 2018 | tonnes | 9490     |        |  |
| Greece        | Wheat                    | 2018 | tonnes | 1072940  |        |  |
| Grenada       | Apples                   | 2018 | tonnes | 457      |        |  |
| Grenada       | Maize                    | 2018 | tonnes | 365      |        |  |
| Grenada       | Pumpkins,squashandgourds | 2018 | tonnes |          | 395    |  |
| Guadeloupe    | Potatoes                 | 2018 | tonnes |          |        |  |
| Guadeloupe    | Pumpkins,squashandgourds | 2018 | tonnes |          | 343    |  |
| Guam          | Maize                    | 2018 | tonnes | 56       |        |  |
| Guam          | Pumpkins,squashandgourds | 2018 | tonnes |          |        |  |
| Guatemala     | Apples                   | 2018 | tonnes | 24800    |        |  |
| Guatemala     | Barley                   | 2018 | tonnes | 17       |        |  |
| Guatemala     | Grapes                   | 2018 | tonnes | 20099    |        |  |
| Guatemala     | Maize                    | 2018 | tonnes | 1921936  |        |  |
| Guatemala     | Potatoes                 | 2018 | tonnes | 564314   |        |  |
| Guatemala     | Rice,paddy               | 2018 | tonnes | 31498    |        |  |
| Guatemala     | Soybeans                 | 2018 | tonnes | 38000    |        |  |
| Guatemala     | Wheat                    | 2018 | tonnes | 1282     |        |  |
| Guinea        | Maize                    | 2018 | tonnes | 818544   |        |  |
| Guinea        | Potatoes                 | 2018 | tonnes | 151326   |        |  |
| Guinea        | Rice,paddy               | 2018 | tonnes | 2339747  |        |  |
| Guinea-Bissau | Maize                    | 2018 | tonnes | 7254     |        |  |
| Guinea-Bissau | Rice,paddy               | 2018 | tonnes |          | 171239 |  |
| Guyana        | Maize                    | 2018 | tonnes | 4284     |        |  |
| Guyana        | Peas,dry                 | 2018 | tonnes | 445      |        |  |
| Guyana        | Pumpkins,squashandgourds | 2018 | tonnes |          | 59429  |  |
| Guyana        | Rice,paddy               | 2018 | tonnes | 964472   |        |  |
| Guyana        | Soybeans                 | 2018 | tonnes |          |        |  |
| Haiti         | Maize                    | 2018 | tonnes | 260000   |        |  |
| Haiti         | Potatoes                 | 2018 | tonnes | 34475    |        |  |
| Haiti         | Pumpkins,squashandgourds | 2018 | tonnes |          | 695    |  |
| Haiti         | Rice,paddy               | 2018 | tonnes | 183000   |        |  |
| Honduras      | Apples                   | 2018 | tonnes | 189      |        |  |
| Honduras      | Grapes                   | 2018 | tonnes | 180      |        |  |
| Honduras      | Maize                    | 2018 | tonnes | 704747   |        |  |
| Honduras      | Potatoes                 | 2018 | tonnes | 26904    |        |  |
| Honduras      | Pumpkins,squashandgourds | 2018 | tonnes |          | 4675   |  |
| Honduras      | Rice,paddy               | 2018 | tonnes | 59698    |        |  |
| Honduras      | Soybeans                 | 2018 | tonnes | 982      |        |  |
| Honduras      | Wheat                    | 2018 | tonnes | 1248     |        |  |
| Hungary       | Apples                   | 2018 | tonnes | 674525   |        |  |
| Hungary       | Barley                   | 2018 | tonnes | 1141007  |        |  |
| Hungary       | Grapes                   | 2018 | tonnes | 539940   |        |  |

|                         |                          |      |        |           |          |
|-------------------------|--------------------------|------|--------|-----------|----------|
| Hungary                 | Maize                    | 2018 | tonnes | 7963217   |          |
| Hungary                 | Peas,dry                 | 2018 | tonnes | 32022     |          |
| Hungary                 | Potatoes                 | 2018 | tonnes | 330545    |          |
| Hungary                 | Pumpkins,squashandgourds | 2018 | tonnes |           | 16677    |
| Hungary                 | Rice,paddy               | 2018 | tonnes | 11971     |          |
| Hungary                 | Safflowerseed            | 2018 | tonnes | 7         |          |
| Hungary                 | Soybeans                 | 2018 | tonnes | 178200    |          |
| Hungary                 | Wheat                    | 2018 | tonnes | 5245890   |          |
| Iceland                 | Barley                   | 2018 | tonnes | 3900      |          |
| Iceland                 | Potatoes                 | 2018 | tonnes | 6020      |          |
| India                   | Apples                   | 2018 | tonnes | 2327000   |          |
| India                   | Barley                   | 2018 | tonnes | 1780000   |          |
| India                   | Grapes                   | 2018 | tonnes | 2920000   |          |
| India                   | Maize                    | 2018 | tonnes | 27820000  |          |
| India                   | Peas,dry                 | 2018 | tonnes | 920473    |          |
| India                   | Potatoes                 | 2018 | tonnes | 48529000  |          |
| India                   | Pumpkins,squashandgourds | 2018 | tonnes |           | 5569809  |
| India                   | Rice,paddy               | 2018 | tonnes | 172580000 |          |
| India                   | Safflowerseed            | 2018 | tonnes | 55000     |          |
| India                   | Soybeans                 | 2018 | tonnes | 13786000  |          |
| India                   | Wheat                    | 2018 | tonnes | 99700000  |          |
| Indonesia               | Maize                    | 2018 | tonnes | 30253938  |          |
| Indonesia               | Potatoes                 | 2018 | tonnes | 1284762   |          |
| Indonesia               | Pumpkins,squashandgourds | 2018 | tonnes |           | 454001   |
| Indonesia               | Rice,paddy               | 2018 | tonnes | 83037000  |          |
| Indonesia               | Soybeans                 | 2018 | tonnes | 953571    |          |
| Iran(IslamicRepublicof) | Apples                   | 2018 | tonnes |           | 2519249  |
| Iran(IslamicRepublicof) | Barley                   | 2018 | tonnes |           | 2800000  |
| Iran(IslamicRepublicof) | Grapes                   | 2018 | tonnes |           | 2032031  |
| Iran(IslamicRepublicof) | Maize                    | 2018 | tonnes |           | 1338258  |
| Iran(IslamicRepublicof) | Peas,dry                 | 2018 | tonnes |           |          |
| Iran(IslamicRepublicof) | Pistachios               | 2018 | tonnes |           | 551307   |
| Iran(IslamicRepublicof) | Potatoes                 | 2018 | tonnes |           | 5321188  |
| Iran(IslamicRepublicof) | Pumpkins,squashandgourds | 2018 | tonnes |           | 154096   |
| Iran(IslamicRepublicof) | Rice,paddy               | 2018 | tonnes |           | 1990000  |
| Iran(IslamicRepublicof) | Safflowerseed            | 2018 | tonnes |           | 6154     |
| Iran(IslamicRepublicof) | Soybeans                 | 2018 | tonnes |           | 210000   |
| Iran(IslamicRepublicof) | Wheat                    | 2018 | tonnes |           | 14500000 |
| Iraq                    | Apples                   | 2018 | tonnes | 49813     |          |
| Iraq                    | Barley                   | 2018 | tonnes | 571283    |          |
| Iraq                    | Grapes                   | 2018 | tonnes | 95725     |          |
| Iraq                    | Maize                    | 2018 | tonnes | 209059    |          |
| Iraq                    | Potatoes                 | 2018 | tonnes | 294778    |          |
| Iraq                    | Pumpkins,squashandgourds | 2018 | tonnes |           | 22459    |
| Iraq                    | Rice,paddy               | 2018 | tonnes | 274788    |          |
| Iraq                    | Soybeans                 | 2018 | tonnes | 29        |          |
| Iraq                    | Wheat                    | 2018 | tonnes | 3211382   |          |
| Ireland                 | Apples                   | 2018 | tonnes | 20100     |          |
| Ireland                 | Barley                   | 2018 | tonnes | 1224900   |          |
| Ireland                 | Peas,dry                 | 2018 | tonnes | 1700      |          |
| Ireland                 | Potatoes                 | 2018 | tonnes | 273000    |          |
| Ireland                 | Wheat                    | 2018 | tonnes | 506800    |          |
| Israel                  | Apples                   | 2018 | tonnes | 111000    |          |
| Israel                  | Barley                   | 2018 | tonnes | 8750      |          |
| Israel                  | Grapes                   | 2018 | tonnes | 63000     |          |
| Israel                  | Maize                    | 2018 | tonnes | 81930     |          |

|            |                             |      |        |          |        |
|------------|-----------------------------|------|--------|----------|--------|
| Israel     | Peas, dry                   | 2018 | tonnes | 444      |        |
| Israel     | Potatoes                    | 2018 | tonnes | 511163   |        |
| Israel     | Pumpkins, squash and gourds | 2018 | tonnes |          | 8873   |
| Israel     | Safflower seed              | 2018 | tonnes | 3        |        |
| Israel     | Wheat                       | 2018 | tonnes | 70500    |        |
| Italy      | Apples                      | 2018 | tonnes | 2414921  |        |
| Italy      | Barley                      | 2018 | tonnes | 1010328  |        |
| Italy      | Grapes                      | 2018 | tonnes | 8513643  |        |
| Italy      | Maize                       | 2018 | tonnes | 6179035  |        |
| Italy      | Peas, dry                   | 2018 | tonnes | 50195    |        |
| Italy      | Pistachios                  | 2018 | tonnes | 3864     |        |
| Italy      | Potatoes                    | 2018 | tonnes | 1307598  |        |
| Italy      | Pumpkins, squash and gourds | 2018 | tonnes |          | 596397 |
| Italy      | Rice, paddy                 | 2018 | tonnes | 1512241  |        |
| Italy      | Soybeans                    | 2018 | tonnes | 1138993  |        |
| Italy      | Wheat                       | 2018 | tonnes | 6932943  |        |
| Jamaica    | Maize                       | 2018 | tonnes | 2177     |        |
| Jamaica    | Peas, dry                   | 2018 | tonnes | 857      |        |
| Jamaica    | Potatoes                    | 2018 | tonnes | 16184    |        |
| Jamaica    | Pumpkins, squash and gourds | 2018 | tonnes |          | 53987  |
| Jamaica    | Rice, paddy                 | 2018 | tonnes | 0        |        |
| Japan      | Apples                      | 2018 | tonnes | 756100   |        |
| Japan      | Barley                      | 2018 | tonnes | 174700   |        |
| Japan      | Grapes                      | 2018 | tonnes | 174700   |        |
| Japan      | Maize                       | 2018 | tonnes | 165      |        |
| Japan      | Peas, dry                   | 2018 | tonnes | 1177     |        |
| Japan      | Potatoes                    | 2018 | tonnes | 2261945  |        |
| Japan      | Pumpkins, squash and gourds | 2018 | tonnes |          | 197163 |
| Japan      | Rice, paddy                 | 2018 | tonnes | 9727500  |        |
| Japan      | Safflower seed              | 2018 | tonnes |          |        |
| Japan      | Soybeans                    | 2018 | tonnes | 211300   |        |
| Japan      | Wheat                       | 2018 | tonnes | 764900   |        |
| Jordan     | Apples                      | 2018 | tonnes | 42394    |        |
| Jordan     | Barley                      | 2018 | tonnes | 35173    |        |
| Jordan     | Grapes                      | 2018 | tonnes | 44717    |        |
| Jordan     | Maize                       | 2018 | tonnes | 21914    |        |
| Jordan     | Pistachios                  | 2018 | tonnes | 620      |        |
| Jordan     | Potatoes                    | 2018 | tonnes | 177431   |        |
| Jordan     | Pumpkins, squash and gourds | 2018 | tonnes |          | 75034  |
| Jordan     | Soybeans                    | 2018 | tonnes | 0        |        |
| Jordan     | Wheat                       | 2018 | tonnes | 20668    |        |
| Kazakhstan | Apples                      | 2018 | tonnes | 222482   |        |
| Kazakhstan | Barley                      | 2018 | tonnes | 3971266  |        |
| Kazakhstan | Grapes                      | 2018 | tonnes | 88547    |        |
| Kazakhstan | Maize                       | 2018 | tonnes | 862094   |        |
| Kazakhstan | Peas, dry                   | 2018 | tonnes | 136541   |        |
| Kazakhstan | Potatoes                    | 2018 | tonnes | 3806992  |        |
| Kazakhstan | Rice, paddy                 | 2018 | tonnes | 482945   |        |
| Kazakhstan | Safflower seed              | 2018 | tonnes | 214149   |        |
| Kazakhstan | Soybeans                    | 2018 | tonnes | 255437   |        |
| Kazakhstan | Wheat                       | 2018 | tonnes | 13944108 |        |
| Kenya      | Apples                      | 2018 | tonnes | 426      |        |
| Kenya      | Barley                      | 2018 | tonnes | 78089    |        |
| Kenya      | Maize                       | 2018 | tonnes | 4013777  |        |
| Kenya      | Potatoes                    | 2018 | tonnes | 1870375  |        |
| Kenya      | Rice, paddy                 | 2018 | tonnes | 110325   |        |

|                               |                          |      |            |         |        |         |
|-------------------------------|--------------------------|------|------------|---------|--------|---------|
| Kenya                         | Soybeans                 | 2018 | tonnes     | 2304    |        |         |
| Kenya                         | Wheat                    | 2018 | tonnes     | 336600  |        |         |
| Kuwait                        | Barley                   | 2018 | tonnes     | 2338    |        |         |
| Kuwait                        | Grapes                   | 2018 | tonnes     | 214     |        |         |
| Kuwait                        | Maize                    | 2018 | tonnes     | 8869    |        |         |
| Kuwait                        | Potatoes                 | 2018 | tonnes     | 36212   |        |         |
| Kuwait                        | Pumpkins,squashandgourds | 2018 | tonnes     |         | 18401  |         |
| Kuwait                        | Wheat                    | 2018 | tonnes     | 9       |        |         |
| Kyrgyzstan                    | Apples                   | 2018 | tonnes     | 144889  |        |         |
| Kyrgyzstan                    | Barley                   | 2018 | tonnes     | 429306  |        |         |
| Kyrgyzstan                    | Grapes                   | 2018 | tonnes     | 8774    |        |         |
| Kyrgyzstan                    | Maize                    | 2018 | tonnes     | 692877  |        |         |
| Kyrgyzstan                    | Peas,dry                 | 2018 | tonnes     | 491     |        |         |
| Kyrgyzstan                    | Pistachios               | 2018 | tonnes     | 1036    |        |         |
| Kyrgyzstan                    | Potatoes                 | 2018 | tonnes     | 1446610 |        |         |
| Kyrgyzstan                    | Pumpkins,squashandgourds | 2018 | tonnes     |         | 3713   |         |
| Kyrgyzstan                    | Rice,paddy               | 2018 | tonnes     | 40783   |        |         |
| Kyrgyzstan                    | Safflowerseed            | 2018 | tonnes     | 12291   |        |         |
| Kyrgyzstan                    | Soybeans                 | 2018 | tonnes     | 2872    |        |         |
| Kyrgyzstan                    | Wheat                    | 2018 | tonnes     | 615926  |        |         |
| LaoPeople'sDemocraticRepublic |                          |      | Maize      | 2018    | tonnes | 981680  |
| LaoPeople'sDemocraticRepublic |                          |      | Potatoes   | 2018    | tonnes | 2160    |
| LaoPeople'sDemocraticRepublic |                          |      | Rice,paddy | 2018    | tonnes | 3584700 |
| LaoPeople'sDemocraticRepublic |                          |      | Soybeans   | 2018    | tonnes | 8380    |
| Latvia                        | Apples                   | 2018 | tonnes     | 13913   |        |         |
| Latvia                        | Barley                   | 2018 | tonnes     | 306300  |        |         |
| Latvia                        | Peas,dry                 | 2018 | tonnes     | 22500   |        |         |
| Latvia                        | Potatoes                 | 2018 | tonnes     | 426900  |        |         |
| Latvia                        | Pumpkins,squashandgourds | 2018 | tonnes     |         | 6399   |         |
| Latvia                        | Soybeans                 | 2018 | tonnes     |         |        |         |
| Latvia                        | Wheat                    | 2018 | tonnes     | 1431600 |        |         |
| Lebanon                       | Apples                   | 2018 | tonnes     | 124464  |        |         |
| Lebanon                       | Barley                   | 2018 | tonnes     | 31446   |        |         |
| Lebanon                       | Grapes                   | 2018 | tonnes     | 67184   |        |         |
| Lebanon                       | Maize                    | 2018 | tonnes     | 3288    |        |         |
| Lebanon                       | Peas,dry                 | 2018 | tonnes     | 3714    |        |         |
| Lebanon                       | Potatoes                 | 2018 | tonnes     | 387791  |        |         |
| Lebanon                       | Pumpkins,squashandgourds | 2018 | tonnes     |         | 27486  |         |
| Lebanon                       | Wheat                    | 2018 | tonnes     | 135411  |        |         |
| Lesotho                       | Barley                   | 2018 | tonnes     | 453     |        |         |
| Lesotho                       | Maize                    | 2018 | tonnes     | 100242  |        |         |
| Lesotho                       | Peas,dry                 | 2018 | tonnes     | 498     |        |         |
| Lesotho                       | Potatoes                 | 2018 | tonnes     | 130602  |        |         |
| Lesotho                       | Wheat                    | 2018 | tonnes     | 9058    |        |         |
| Liberia                       | Rice,paddy               | 2018 | tonnes     | 257995  |        |         |
| Liberia                       | Soybeans                 | 2018 | tonnes     | 3290    |        |         |
| Libya                         | Apples                   | 2018 | tonnes     | 19111   |        |         |
| Libya                         | Barley                   | 2018 | tonnes     | 93208   |        |         |
| Libya                         | Grapes                   | 2018 | tonnes     | 32077   |        |         |
| Libya                         | Maize                    | 2018 | tonnes     | 3571    |        |         |
| Libya                         | Peas,dry                 | 2018 | tonnes     | 6005    |        |         |
| Libya                         | Potatoes                 | 2018 | tonnes     | 348361  |        |         |
| Libya                         | Pumpkins,squashandgourds | 2018 | tonnes     |         | 35290  |         |
| Libya                         | Wheat                    | 2018 | tonnes     | 138770  |        |         |
| Liechtenstein                 | Grapes                   | 2018 | tonnes     | 196     |        |         |
| Lithuania                     | Apples                   | 2018 | tonnes     | 92034   |        |         |

|            |                          |      |        |         |        |  |
|------------|--------------------------|------|--------|---------|--------|--|
| Lithuania  | Barley                   | 2018 | tonnes | 619538  |        |  |
| Lithuania  | Grapes                   | 2018 | tonnes |         |        |  |
| Lithuania  | Maize                    | 2018 | tonnes | 87587   |        |  |
| Lithuania  | Peas,dry                 | 2018 | tonnes | 213692  |        |  |
| Lithuania  | Potatoes                 | 2018 | tonnes | 296229  |        |  |
| Lithuania  | Pumpkins,squashandgourds | 2018 | tonnes |         | 1526   |  |
| Lithuania  | Wheat                    | 2018 | tonnes | 2838899 |        |  |
| Luxembourg | Apples                   | 2018 | tonnes | 2077    |        |  |
| Luxembourg | Barley                   | 2018 | tonnes | 34662   |        |  |
| Luxembourg | Grapes                   | 2018 | tonnes | 18076   |        |  |
| Luxembourg | Maize                    | 2018 | tonnes | 565     |        |  |
| Luxembourg | Peas,dry                 | 2018 | tonnes | 921     |        |  |
| Luxembourg | Potatoes                 | 2018 | tonnes | 16211   |        |  |
| Luxembourg | Wheat                    | 2018 | tonnes | 78409   |        |  |
| Madagascar | Apples                   | 2018 | tonnes | 7111    |        |  |
| Madagascar | Grapes                   | 2018 | tonnes | 13512   |        |  |
| Madagascar | Maize                    | 2018 | tonnes | 215000  |        |  |
| Madagascar | Peas,dry                 | 2018 | tonnes | 21456   |        |  |
| Madagascar | Pistachios               | 2018 | tonnes | 3167    |        |  |
| Madagascar | Potatoes                 | 2018 | tonnes | 257379  |        |  |
| Madagascar | Rice,paddy               | 2018 | tonnes | 4030000 |        |  |
| Madagascar | Soybeans                 | 2018 | tonnes | 44      |        |  |
| Madagascar | Wheat                    | 2018 | tonnes | 6322    |        |  |
| Malawi     | Apples                   | 2018 | tonnes | 2639    |        |  |
| Malawi     | Grapes                   | 2018 | tonnes | 240     |        |  |
| Malawi     | Maize                    | 2018 | tonnes | 2697959 |        |  |
| Malawi     | Peas,dry                 | 2018 | tonnes | 3199    |        |  |
| Malawi     | Potatoes                 | 2018 | tonnes | 1125874 |        |  |
| Malawi     | Pumpkins,squashandgourds | 2018 | tonnes |         | 480233 |  |
| Malawi     | Rice,paddy               | 2018 | tonnes | 112313  |        |  |
| Malawi     | Soybeans                 | 2018 | tonnes | 175475  |        |  |
| Malawi     | Wheat                    | 2018 | tonnes | 729     |        |  |
| Malaysia   | Maize                    | 2018 | tonnes | 76362   |        |  |
| Malaysia   | Pumpkins,squashandgourds | 2018 | tonnes |         | 29568  |  |
| Malaysia   | Rice,paddy               | 2018 | tonnes | 2718987 |        |  |
| Malaysia   | Soybeans                 | 2018 | tonnes |         |        |  |
| Maldives   | Maize                    | 2018 | tonnes | 147     |        |  |
| Mali       | Maize                    | 2018 | tonnes | 3624950 |        |  |
| Mali       | Potatoes                 | 2018 | tonnes | 310902  |        |  |
| Mali       | Pumpkins,squashandgourds | 2018 | tonnes |         | 67969  |  |
| Mali       | Rice,paddy               | 2018 | tonnes | 3167528 |        |  |
| Mali       | Soybeans                 | 2018 | tonnes | 6693    |        |  |
| Mali       | Wheat                    | 2018 | tonnes | 29185   |        |  |
| Malta      | Apples                   | 2018 | tonnes | 20      |        |  |
| Malta      | Barley                   | 2018 | tonnes | 2186    |        |  |
| Malta      | Grapes                   | 2018 | tonnes | 3632    |        |  |
| Malta      | Potatoes                 | 2018 | tonnes | 7977    |        |  |
| Malta      | Pumpkins,squashandgourds | 2018 | tonnes |         | 1369   |  |
| Malta      | Wheat                    | 2018 | tonnes | 12208   |        |  |
| Martinique | Potatoes                 | 2018 | tonnes |         |        |  |
| Martinique | Pumpkins,squashandgourds | 2018 | tonnes |         |        |  |
| Mauritania | Barley                   | 2018 | tonnes | 1535    |        |  |
| Mauritania | Maize                    | 2018 | tonnes | 15519   |        |  |
| Mauritania | Peas,dry                 | 2018 | tonnes | 7670    |        |  |
| Mauritania | Potatoes                 | 2018 | tonnes | 2260    |        |  |
| Mauritania | Rice,paddy               | 2018 | tonnes | 232196  |        |  |

|                               |                          |      |        |          |        |  |
|-------------------------------|--------------------------|------|--------|----------|--------|--|
| Mauritania                    | Wheat                    | 2018 | tonnes | 7349     |        |  |
| Mauritius                     | Maize                    | 2018 | tonnes | 387      |        |  |
| Mauritius                     | Pistachios               | 2018 | tonnes | 4        |        |  |
| Mauritius                     | Potatoes                 | 2018 | tonnes | 17033    |        |  |
| Mauritius                     | Pumpkins,squashandgourds | 2018 | tonnes |          | 17414  |  |
| Mauritius                     | Rice,paddy               | 2018 | tonnes | 19       |        |  |
| Mexico                        | Apples                   | 2018 | tonnes | 659692   |        |  |
| Mexico                        | Barley                   | 2018 | tonnes | 1008642  |        |  |
| Mexico                        | Grapes                   | 2018 | tonnes | 430658   |        |  |
| Mexico                        | Maize                    | 2018 | tonnes | 27169977 |        |  |
| Mexico                        | Peas,dry                 | 2018 | tonnes | 1876     |        |  |
| Mexico                        | Pistachios               | 2018 | tonnes | 61       |        |  |
| Mexico                        | Potatoes                 | 2018 | tonnes | 1802592  |        |  |
| Mexico                        | Pumpkins,squashandgourds | 2018 | tonnes |          | 776073 |  |
| Mexico                        | Rice,paddy               | 2018 | tonnes | 283763   |        |  |
| Mexico                        | Safflowerseed            | 2018 | tonnes | 58675    |        |  |
| Mexico                        | Soybeans                 | 2018 | tonnes | 324011   |        |  |
| Mexico                        | Wheat                    | 2018 | tonnes | 2943445  |        |  |
| Micronesia(FederatedStatesof) | Maize                    | 2018 | tonnes |          | 93     |  |
| Micronesia(FederatedStatesof) | Rice,paddy               | 2018 | tonnes |          | 177    |  |
| Mongolia                      | Barley                   | 2018 | tonnes | 2355     |        |  |
| Mongolia                      | Potatoes                 | 2018 | tonnes | 168883   |        |  |
| Mongolia                      | Wheat                    | 2018 | tonnes | 436115   |        |  |
| Montenegro                    | Apples                   | 2018 | tonnes | 1688     |        |  |
| Montenegro                    | Barley                   | 2018 | tonnes | 1082     |        |  |
| Montenegro                    | Grapes                   | 2018 | tonnes | 24441    |        |  |
| Montenegro                    | Maize                    | 2018 | tonnes | 2743     |        |  |
| Montenegro                    | Peas,dry                 | 2018 | tonnes | 1389     |        |  |
| Montenegro                    | Potatoes                 | 2018 | tonnes | 26098    |        |  |
| Montenegro                    | Wheat                    | 2018 | tonnes | 2467     |        |  |
| Montserrat                    | Maize                    | 2018 | tonnes | 138      |        |  |
| Montserrat                    | Potatoes                 | 2018 | tonnes | 219      |        |  |
| Morocco                       | Apples                   | 2018 | tonnes | 696950   |        |  |
| Morocco                       | Barley                   | 2018 | tonnes | 2851022  |        |  |
| Morocco                       | Grapes                   | 2018 | tonnes | 451158   |        |  |
| Morocco                       | Maize                    | 2018 | tonnes | 118392   |        |  |
| Morocco                       | Peas,dry                 | 2018 | tonnes | 35470    |        |  |
| Morocco                       | Pistachios               | 2018 | tonnes | 47       |        |  |
| Morocco                       | Potatoes                 | 2018 | tonnes | 1869149  |        |  |
| Morocco                       | Pumpkins,squashandgourds | 2018 | tonnes |          | 180463 |  |
| Morocco                       | Rice,paddy               | 2018 | tonnes | 63037    |        |  |
| Morocco                       | Safflowerseed            | 2018 | tonnes |          |        |  |
| Morocco                       | Soybeans                 | 2018 | tonnes | 732      |        |  |
| Morocco                       | Wheat                    | 2018 | tonnes | 7320620  |        |  |
| Mozambique                    | Maize                    | 2018 | tonnes | 1654143  |        |  |
| Mozambique                    | Potatoes                 | 2018 | tonnes | 273335   |        |  |
| Mozambique                    | Pumpkins,squashandgourds | 2018 | tonnes |          | 1090   |  |
| Mozambique                    | Rice,paddy               | 2018 | tonnes | 134105   |        |  |
| Mozambique                    | Wheat                    | 2018 | tonnes | 21105    |        |  |
| Myanmar                       | Barley                   | 2018 | tonnes |          |        |  |
| Myanmar                       | Maize                    | 2018 | tonnes | 1983122  |        |  |
| Myanmar                       | Peas,dry                 | 2018 | tonnes | 80382    |        |  |
| Myanmar                       | Potatoes                 | 2018 | tonnes | 512443   |        |  |
| Myanmar                       | Rice,paddy               | 2018 | tonnes | 25418142 |        |  |
| Myanmar                       | Soybeans                 | 2018 | tonnes | 170985   |        |  |
| Myanmar                       | Wheat                    | 2018 | tonnes | 134372   |        |  |



|                |                          |      |        |          |        |  |
|----------------|--------------------------|------|--------|----------|--------|--|
| Namibia        | Grapes                   | 2018 | tonnes | 26645    |        |  |
| Namibia        | Maize                    | 2018 | tonnes | 59253    |        |  |
| Namibia        | Potatoes                 | 2018 | tonnes | 14520    |        |  |
| Namibia        | Wheat                    | 2018 | tonnes | 6094     |        |  |
| Nepal          | Apples                   | 2018 | tonnes | 28895    |        |  |
| Nepal          | Barley                   | 2018 | tonnes | 30510    |        |  |
| Nepal          | Maize                    | 2018 | tonnes | 2473283  |        |  |
| Nepal          | Potatoes                 | 2018 | tonnes | 3088000  |        |  |
| Nepal          | Rice,paddy               | 2018 | tonnes | 5151925  |        |  |
| Nepal          | Soybeans                 | 2018 | tonnes | 27681    |        |  |
| Nepal          | Wheat                    | 2018 | tonnes | 1949001  |        |  |
| Netherlands    | Apples                   | 2018 | tonnes | 269000   |        |  |
| Netherlands    | Barley                   | 2018 | tonnes | 253423   |        |  |
| Netherlands    | Grapes                   | 2018 | tonnes | 420      |        |  |
| Netherlands    | Maize                    | 2018 | tonnes | 84894    |        |  |
| Netherlands    | Peas,dry                 | 2018 | tonnes | 2563     |        |  |
| Netherlands    | Potatoes                 | 2018 | tonnes | 6029734  |        |  |
| Netherlands    | Pumpkins,squashandgourds | 2018 | tonnes |          | 22891  |  |
| Netherlands    | Soybeans                 | 2018 | tonnes |          |        |  |
| Netherlands    | Wheat                    | 2018 | tonnes | 985297   |        |  |
| NewCaledonia   | Maize                    | 2018 | tonnes | 10184    |        |  |
| NewCaledonia   | Potatoes                 | 2018 | tonnes | 2510     |        |  |
| NewCaledonia   | Wheat                    | 2018 | tonnes | 4        |        |  |
| NewZealand     | Apples                   | 2018 | tonnes | 453911   |        |  |
| NewZealand     | Barley                   | 2018 | tonnes | 379704   |        |  |
| NewZealand     | Grapes                   | 2018 | tonnes | 426781   |        |  |
| NewZealand     | Maize                    | 2018 | tonnes | 191993   |        |  |
| NewZealand     | Peas,dry                 | 2018 | tonnes | 19380    |        |  |
| NewZealand     | Potatoes                 | 2018 | tonnes | 511776   |        |  |
| NewZealand     | Pumpkins,squashandgourds | 2018 | tonnes |          | 114392 |  |
| NewZealand     | Rice,paddy               | 2018 | tonnes |          |        |  |
| NewZealand     | Soybeans                 | 2018 | tonnes |          |        |  |
| NewZealand     | Wheat                    | 2018 | tonnes | 371027   |        |  |
| Nicaragua      | Maize                    | 2018 | tonnes | 395226   |        |  |
| Nicaragua      | Potatoes                 | 2018 | tonnes | 66167    |        |  |
| Nicaragua      | Rice,paddy               | 2018 | tonnes | 365000   |        |  |
| Nicaragua      | Soybeans                 | 2018 | tonnes | 10000    |        |  |
| Niger          | Maize                    | 2018 | tonnes | 29536    |        |  |
| Niger          | Peas,dry                 | 2018 | tonnes | 1285     |        |  |
| Niger          | Potatoes                 | 2018 | tonnes | 168569   |        |  |
| Niger          | Pumpkins,squashandgourds | 2018 | tonnes |          | 138884 |  |
| Niger          | Rice,paddy               | 2018 | tonnes | 101607   |        |  |
| Niger          | Wheat                    | 2018 | tonnes | 4807     |        |  |
| Nigeria        | Maize                    | 2018 | tonnes | 10155027 |        |  |
| Nigeria        | Potatoes                 | 2018 | tonnes | 1363358  |        |  |
| Nigeria        | Rice,paddy               | 2018 | tonnes | 6809327  |        |  |
| Nigeria        | Soybeans                 | 2018 | tonnes | 758033   |        |  |
| Nigeria        | Wheat                    | 2018 | tonnes | 65433    |        |  |
| NorthMacedonia | Apples                   | 2018 | tonnes | 140296   |        |  |
| NorthMacedonia | Barley                   | 2018 | tonnes | 130028   |        |  |
| NorthMacedonia | Grapes                   | 2018 | tonnes | 294497   |        |  |
| NorthMacedonia | Maize                    | 2018 | tonnes | 190722   |        |  |
| NorthMacedonia | Peas,dry                 | 2018 | tonnes | 2451     |        |  |
| NorthMacedonia | Potatoes                 | 2018 | tonnes | 181931   |        |  |
| NorthMacedonia | Rice,paddy               | 2018 | tonnes | 19732    |        |  |
| NorthMacedonia | Soybeans                 | 2018 | tonnes | 20       |        |  |

|                |                          |      |        |          |  |
|----------------|--------------------------|------|--------|----------|--|
| NorthMacedonia | Wheat                    | 2018 | tonnes | 241106   |  |
| Norway         | Apples                   | 2018 | tonnes | 14940    |  |
| Norway         | Barley                   | 2018 | tonnes | 400000   |  |
| Norway         | Peas,dry                 | 2018 | tonnes | 2700     |  |
| Norway         | Potatoes                 | 2018 | tonnes | 326400   |  |
| Norway         | Wheat                    | 2018 | tonnes | 123500   |  |
| Oman           | Barley                   | 2018 | tonnes | 1661     |  |
| Oman           | Maize                    | 2018 | tonnes | 8827     |  |
| Oman           | Potatoes                 | 2018 | tonnes | 15613    |  |
| Oman           | Pumpkins,squashandgourds | 2018 | tonnes | 10452    |  |
| Oman           | Wheat                    | 2018 | tonnes | 3579     |  |
| Pakistan       | Apples                   | 2018 | tonnes | 545875   |  |
| Pakistan       | Barley                   | 2018 | tonnes | 55131    |  |
| Pakistan       | Grapes                   | 2018 | tonnes | 67180    |  |
| Pakistan       | Maize                    | 2018 | tonnes | 6308897  |  |
| Pakistan       | Peas,dry                 | 2018 | tonnes | 27123    |  |
| Pakistan       | Pistachios               | 2018 | tonnes | 654      |  |
| Pakistan       | Potatoes                 | 2018 | tonnes | 4591776  |  |
| Pakistan       | Pumpkins,squashandgourds | 2018 | tonnes | 266137   |  |
| Pakistan       | Rice,paddy               | 2018 | tonnes | 10802949 |  |
| Pakistan       | Safflowerseed            | 2018 | tonnes | 0        |  |
| Pakistan       | Soybeans                 | 2018 | tonnes | 29       |  |
| Pakistan       | Wheat                    | 2018 | tonnes | 25076149 |  |
| Palestine      | Apples                   | 2018 | tonnes | 877      |  |
| Palestine      | Barley                   | 2018 | tonnes | 14961    |  |
| Palestine      | Grapes                   | 2018 | tonnes | 34693    |  |
| Palestine      | Peas,dry                 | 2018 | tonnes | 134      |  |
| Palestine      | Potatoes                 | 2018 | tonnes | 57315    |  |
| Palestine      | Pumpkins,squashandgourds | 2018 | tonnes | 45769    |  |
| Palestine      | Safflowerseed            | 2018 | tonnes | 1        |  |
| Palestine      | Wheat                    | 2018 | tonnes | 34167    |  |
| Panama         | Maize                    | 2018 | tonnes | 112446   |  |
| Panama         | Potatoes                 | 2018 | tonnes | 23941    |  |
| Panama         | Rice,paddy               | 2018 | tonnes | 314946   |  |
| Panama         | Soybeans                 | 2018 | tonnes | 88       |  |
| PapuaNewGuinea | Maize                    | 2018 | tonnes | 14333    |  |
| PapuaNewGuinea | Potatoes                 | 2018 | tonnes | 1291     |  |
| PapuaNewGuinea | Pumpkins,squashandgourds | 2018 | tonnes | 152      |  |
| PapuaNewGuinea | Rice,paddy               | 2018 | tonnes | 850      |  |
| Paraguay       | Apples                   | 2018 | tonnes | 511      |  |
| Paraguay       | Grapes                   | 2018 | tonnes | 1930     |  |
| Paraguay       | Maize                    | 2018 | tonnes | 5344650  |  |
| Paraguay       | Peas,dry                 | 2018 | tonnes | 5829     |  |
| Paraguay       | Potatoes                 | 2018 | tonnes | 3851     |  |
| Paraguay       | Pumpkins,squashandgourds | 2018 | tonnes | 8508     |  |
| Paraguay       | Rice,paddy               | 2018 | tonnes | 894600   |  |
| Paraguay       | Soybeans                 | 2018 | tonnes | 11045971 |  |
| Paraguay       | Wheat                    | 2018 | tonnes | 722400   |  |
| Peru           | Apples                   | 2018 | tonnes | 140569   |  |
| Peru           | Barley                   | 2018 | tonnes | 207215   |  |
| Peru           | Grapes                   | 2018 | tonnes | 645545   |  |
| Peru           | Maize                    | 2018 | tonnes | 1569535  |  |
| Peru           | Peas,dry                 | 2018 | tonnes | 51708    |  |
| Peru           | Potatoes                 | 2018 | tonnes | 5121110  |  |
| Peru           | Pumpkins,squashandgourds | 2018 | tonnes | 221572   |  |
| Peru           | Rice,paddy               | 2018 | tonnes | 3557900  |  |

|             |                          |      |        |          |        |  |
|-------------|--------------------------|------|--------|----------|--------|--|
| Peru        | Soybeans                 | 2018 | tonnes | 1530     |        |  |
| Peru        | Wheat                    | 2018 | tonnes | 195088   |        |  |
| Philippines | Grapes                   | 2018 | tonnes | 212      |        |  |
| Philippines | Maize                    | 2018 | tonnes | 7771919  |        |  |
| Philippines | Peas,dry                 | 2018 | tonnes | 0        |        |  |
| Philippines | Potatoes                 | 2018 | tonnes | 117423   |        |  |
| Philippines | Pumpkins,squashandgourds | 2018 | tonnes |          | 281460 |  |
| Philippines | Rice,paddy               | 2018 | tonnes | 19066094 |        |  |
| Philippines | Soybeans                 | 2018 | tonnes | 658      |        |  |
| Poland      | Apples                   | 2018 | tonnes | 3999523  |        |  |
| Poland      | Barley                   | 2018 | tonnes | 3048273  |        |  |
| Poland      | Maize                    | 2018 | tonnes | 3864028  |        |  |
| Poland      | Peas,dry                 | 2018 | tonnes | 71941    |        |  |
| Poland      | Potatoes                 | 2018 | tonnes | 7478184  |        |  |
| Poland      | Pumpkins,squashandgourds | 2018 | tonnes |          | 98925  |  |
| Poland      | Soybeans                 | 2018 | tonnes | 10271    |        |  |
| Poland      | Wheat                    | 2018 | tonnes | 9820315  |        |  |
| Portugal    | Apples                   | 2018 | tonnes | 267441   |        |  |
| Portugal    | Barley                   | 2018 | tonnes | 49584    |        |  |
| Portugal    | Grapes                   | 2018 | tonnes | 778698   |        |  |
| Portugal    | Maize                    | 2018 | tonnes | 713860   |        |  |
| Portugal    | Potatoes                 | 2018 | tonnes | 431686   |        |  |
| Portugal    | Pumpkins,squashandgourds | 2018 | tonnes |          | 24889  |  |
| Portugal    | Rice,paddy               | 2018 | tonnes | 160648   |        |  |
| Portugal    | Safflowerseed            | 2018 | tonnes |          |        |  |
| Portugal    | Wheat                    | 2018 | tonnes | 67749    |        |  |
| PuertoRico  | Maize                    | 2018 | tonnes | 102      |        |  |
| PuertoRico  | Pumpkins,squashandgourds | 2018 | tonnes |          | 10983  |  |
| PuertoRico  | Rice,paddy               | 2018 | tonnes | 186      |        |  |
| Qatar       | Barley                   | 2018 | tonnes | 237      |        |  |
| Qatar       | Grapes                   | 2018 | tonnes | 5        |        |  |
| Qatar       | Maize                    | 2018 | tonnes | 1866     |        |  |
| Qatar       | Potatoes                 | 2018 | tonnes | 17       |        |  |
| Qatar       | Pumpkins,squashandgourds | 2018 | tonnes |          | 4235   |  |
| Qatar       | Wheat                    | 2018 | tonnes | 15       |        |  |
| SKorea      | Apples                   | 2018 | tonnes | 475303   |        |  |
| SKorea      | Barley                   | 2018 | tonnes | 102702   |        |  |
| SKorea      | Grapes                   | 2018 | tonnes | 177391   |        |  |
| SKorea      | Maize                    | 2018 | tonnes | 74368    |        |  |
| SKorea      | Peas,dry                 | 2018 | tonnes | 5        |        |  |
| SKorea      | Potatoes                 | 2018 | tonnes | 553596   |        |  |
| SKorea      | Pumpkins,squashandgourds | 2018 | tonnes |          | 321591 |  |
| SKorea      | Rice,paddy               | 2018 | tonnes | 5195437  |        |  |
| SKorea      | Soybeans                 | 2018 | tonnes | 89410    |        |  |
| SKorea      | Wheat                    | 2018 | tonnes | 37577    |        |  |
| Moldova     | Apples                   | 2018 | tonnes | 665184   |        |  |
| Moldova     | Barley                   | 2018 | tonnes | 175296   |        |  |
| Moldova     | Grapes                   | 2018 | tonnes | 730171   |        |  |
| Moldova     | Maize                    | 2018 | tonnes | 2073775  |        |  |
| Moldova     | Peas,dry                 | 2018 | tonnes | 31832    |        |  |
| Moldova     | Potatoes                 | 2018 | tonnes | 174774   |        |  |
| Moldova     | Pumpkins,squashandgourds | 2018 | tonnes |          | 62454  |  |
| Moldova     | Rice,paddy               | 2018 | tonnes |          |        |  |
| Moldova     | Soybeans                 | 2018 | tonnes | 57684    |        |  |
| Moldova     | Wheat                    | 2018 | tonnes | 1162778  |        |  |
| Réunion     | Apples                   | 2018 | tonnes | 80       |        |  |

|                              |                          |      |        |          |         |  |
|------------------------------|--------------------------|------|--------|----------|---------|--|
| Réunion                      | Grapes                   | 2018 | tonnes | 284      |         |  |
| Réunion                      | Maize                    | 2018 | tonnes | 13770    |         |  |
| Réunion                      | Potatoes                 | 2018 | tonnes | 4861     |         |  |
| Réunion                      | Pumpkins,squashandgourds | 2018 | tonnes |          | 665     |  |
| Réunion                      | Rice,paddy               | 2018 | tonnes | 304      |         |  |
| Romania                      | Apples                   | 2018 | tonnes | 643856   |         |  |
| Romania                      | Barley                   | 2018 | tonnes | 1870710  |         |  |
| Romania                      | Grapes                   | 2018 | tonnes | 1144305  |         |  |
| Romania                      | Maize                    | 2018 | tonnes | 18663939 |         |  |
| Romania                      | Peas,dry                 | 2018 | tonnes | 170747   |         |  |
| Romania                      | Potatoes                 | 2018 | tonnes | 3022758  |         |  |
| Romania                      | Pumpkins,squashandgourds | 2018 | tonnes |          | 33756   |  |
| Romania                      | Rice,paddy               | 2018 | tonnes | 43355    |         |  |
| Romania                      | Soybeans                 | 2018 | tonnes | 465609   |         |  |
| Romania                      | Wheat                    | 2018 | tonnes | 10143671 |         |  |
| Russia                       | Apples                   | 2018 | tonnes | 1859400  |         |  |
| Russia                       | Barley                   | 2018 | tonnes | 16991907 |         |  |
| Russia                       | Grapes                   | 2018 | tonnes | 627739   |         |  |
| Russia                       | Maize                    | 2018 | tonnes | 11419020 |         |  |
| Russia                       | Peas,dry                 | 2018 | tonnes | 2304432  |         |  |
| Russia                       | Potatoes                 | 2018 | tonnes | 22394960 |         |  |
| Russia                       | Pumpkins,squashandgourds | 2018 | tonnes |          | 1189539 |  |
| Russia                       | Rice,paddy               | 2018 | tonnes | 1038222  |         |  |
| Russia                       | Safflowerseed            | 2018 | tonnes | 25259    |         |  |
| Russia                       | Soybeans                 | 2018 | tonnes | 4026850  |         |  |
| Russia                       | Wheat                    | 2018 | tonnes | 72136149 |         |  |
| Rwanda                       | Barley                   | 2018 | tonnes |          |         |  |
| Rwanda                       | Maize                    | 2018 | tonnes | 410280   |         |  |
| Rwanda                       | Peas,dry                 | 2018 | tonnes | 12423    |         |  |
| Rwanda                       | Potatoes                 | 2018 | tonnes | 847302   |         |  |
| Rwanda                       | Pumpkins,squashandgourds | 2018 | tonnes |          | 258154  |  |
| Rwanda                       | Rice,paddy               | 2018 | tonnes | 119932   |         |  |
| Rwanda                       | Soybeans                 | 2018 | tonnes | 23804    |         |  |
| Rwanda                       | Wheat                    | 2018 | tonnes | 10875    |         |  |
| SaintKittsandNevis           | Potatoes                 | 2018 | tonnes |          | 0       |  |
| SaintLucia                   | Maize                    | 2018 | tonnes |          |         |  |
| SaintLucia                   | Pumpkins,squashandgourds | 2018 | tonnes |          | 394     |  |
| SaintPierreandMiquelon       | Potatoes                 | 2018 | tonnes |          |         |  |
| SaintPierreandMiquelon       | Pumpkins,squashandgourds | 2018 | tonnes |          |         |  |
| SaintVincentandtheGrenadines | Apples                   | 2018 | tonnes | 1826     |         |  |
| SaintVincentandtheGrenadines | Maize                    | 2018 | tonnes | 1030     |         |  |
| SaintVincentandtheGrenadines | Pumpkins,squashandgourds | 2018 | tonnes |          | 482     |  |
| SaintVincentandtheGrenadines | Rice,paddy               | 2018 | tonnes |          |         |  |
| SaoTomeandPrincipe           | Maize                    | 2018 | tonnes | 941      |         |  |
| SaudiArabia                  | Barley                   | 2018 | tonnes | 624702   |         |  |
| SaudiArabia                  | Grapes                   | 2018 | tonnes | 44845    |         |  |
| SaudiArabia                  | Maize                    | 2018 | tonnes | 15394    |         |  |
| SaudiArabia                  | Potatoes                 | 2018 | tonnes | 482305   |         |  |
| SaudiArabia                  | Pumpkins,squashandgourds | 2018 | tonnes |          | 57470   |  |
| SaudiArabia                  | Rice,paddy               | 2018 | tonnes | 0        |         |  |
| SaudiArabia                  | Wheat                    | 2018 | tonnes | 586413   |         |  |
| Senegal                      | Maize                    | 2018 | tonnes | 264105   |         |  |
| Senegal                      | Potatoes                 | 2018 | tonnes | 79499    |         |  |
| Senegal                      | Pumpkins,squashandgourds | 2018 | tonnes |          | 16857   |  |
| Senegal                      | Rice,paddy               | 2018 | tonnes | 762776   |         |  |
| Senegal                      | Soybeans                 | 2018 | tonnes |          |         |  |

|                |                          |      |        |          |        |  |
|----------------|--------------------------|------|--------|----------|--------|--|
| Serbia         | Apples                   | 2018 | tonnes | 460404   |        |  |
| Serbia         | Barley                   | 2018 | tonnes | 410138   |        |  |
| Serbia         | Grapes                   | 2018 | tonnes | 149474   |        |  |
| Serbia         | Maize                    | 2018 | tonnes | 6964770  |        |  |
| Serbia         | Peas,dry                 | 2018 | tonnes |          |        |  |
| Serbia         | Potatoes                 | 2018 | tonnes | 487909   |        |  |
| Serbia         | Soybeans                 | 2018 | tonnes | 645607   |        |  |
| Serbia         | Wheat                    | 2018 | tonnes | 2941601  |        |  |
| SierraLeone    | Maize                    | 2018 | tonnes | 22981    |        |  |
| SierraLeone    | Peas,dry                 | 2018 | tonnes | 3305     |        |  |
| SierraLeone    | Rice,paddy               | 2018 | tonnes | 919785   |        |  |
| Slovakia       | Apples                   | 2018 | tonnes | 43929    |        |  |
| Slovakia       | Barley                   | 2018 | tonnes | 486898   |        |  |
| Slovakia       | Grapes                   | 2018 | tonnes | 52418    |        |  |
| Slovakia       | Maize                    | 2018 | tonnes | 1515834  |        |  |
| Slovakia       | Peas,dry                 | 2018 | tonnes | 16170    |        |  |
| Slovakia       | Potatoes                 | 2018 | tonnes | 169953   |        |  |
| Slovakia       | Pumpkins,squashandgourds | 2018 | tonnes |          | 1590   |  |
| Slovakia       | Soybeans                 | 2018 | tonnes | 104525   |        |  |
| Slovakia       | Wheat                    | 2018 | tonnes | 1927926  |        |  |
| Slovenia       | Apples                   | 2018 | tonnes | 86587    |        |  |
| Slovenia       | Barley                   | 2018 | tonnes | 88057    |        |  |
| Slovenia       | Grapes                   | 2018 | tonnes | 126958   |        |  |
| Slovenia       | Maize                    | 2018 | tonnes | 350489   |        |  |
| Slovenia       | Peas,dry                 | 2018 | tonnes | 1051     |        |  |
| Slovenia       | Potatoes                 | 2018 | tonnes | 72917    |        |  |
| Slovenia       | Soybeans                 | 2018 | tonnes | 5331     |        |  |
| Slovenia       | Wheat                    | 2018 | tonnes | 121901   |        |  |
| SolomonIslands | Rice,paddy               | 2018 | tonnes |          | 2737   |  |
| Somalia        | Maize                    | 2018 | tonnes | 138716   |        |  |
| Somalia        | Rice,paddy               | 2018 | tonnes | 4766     |        |  |
| Somalia        | Wheat                    | 2018 | tonnes | 1033     |        |  |
| SouthAfrica    | Apples                   | 2018 | tonnes | 829636   |        |  |
| SouthAfrica    | Barley                   | 2018 | tonnes | 421500   |        |  |
| SouthAfrica    | Grapes                   | 2018 | tonnes | 1901736  |        |  |
| SouthAfrica    | Maize                    | 2018 | tonnes | 12510000 |        |  |
| SouthAfrica    | Peas,dry                 | 2018 | tonnes | 699      |        |  |
| SouthAfrica    | Potatoes                 | 2018 | tonnes | 2467724  |        |  |
| SouthAfrica    | Pumpkins,squashandgourds | 2018 | tonnes |          | 266746 |  |
| SouthAfrica    | Rice,paddy               | 2018 | tonnes | 3026     |        |  |
| SouthAfrica    | Soybeans                 | 2018 | tonnes | 1540000  |        |  |
| SouthAfrica    | Wheat                    | 2018 | tonnes | 1868000  |        |  |
| SouthSudan     | Maize                    | 2018 | tonnes | 90000    |        |  |
| SouthSudan     | Potatoes                 | 2018 | tonnes |          |        |  |
| SouthSudan     | Pumpkins,squashandgourds | 2018 | tonnes |          | 68273  |  |
| SouthSudan     | Rice,paddy               | 2018 | tonnes |          |        |  |
| SouthSudan     | Wheat                    | 2018 | tonnes |          |        |  |
| Spain          | Apples                   | 2018 | tonnes | 562961   |        |  |
| Spain          | Barley                   | 2018 | tonnes | 9129535  |        |  |
| Spain          | Grapes                   | 2018 | tonnes | 6673481  |        |  |
| Spain          | Maize                    | 2018 | tonnes | 3842519  |        |  |
| Spain          | Peas,dry                 | 2018 | tonnes | 262567   |        |  |
| Spain          | Pistachios               | 2018 | tonnes | 8277     |        |  |
| Spain          | Potatoes                 | 2018 | tonnes | 2010933  |        |  |
| Spain          | Pumpkins,squashandgourds | 2018 | tonnes |          | 717645 |  |
| Spain          | Rice,paddy               | 2018 | tonnes | 808167   |        |  |

|                    |                          |      |        |         |        |  |
|--------------------|--------------------------|------|--------|---------|--------|--|
| Spain              | Safflowerseed            | 2018 | tonnes | 14777   |        |  |
| Spain              | Soybeans                 | 2018 | tonnes | 4249    |        |  |
| Spain              | Wheat                    | 2018 | tonnes | 7989906 |        |  |
| SriLanka           | Maize                    | 2018 | tonnes | 270041  |        |  |
| SriLanka           | Potatoes                 | 2018 | tonnes | 88897   |        |  |
| SriLanka           | Pumpkins,squashandgourds | 2018 | tonnes |         | 123261 |  |
| SriLanka           | Rice,paddy               | 2018 | tonnes | 3929831 |        |  |
| SriLanka           | Soybeans                 | 2018 | tonnes | 2500    |        |  |
| Sudan              | Barley                   | 2018 | tonnes |         |        |  |
| Sudan              | Maize                    | 2018 | tonnes | 45000   |        |  |
| Sudan              | Potatoes                 | 2018 | tonnes | 442988  |        |  |
| Sudan              | Pumpkins,squashandgourds | 2018 | tonnes |         | 29235  |  |
| Sudan              | Rice,paddy               | 2018 | tonnes | 30000   |        |  |
| Sudan              | Wheat                    | 2018 | tonnes | 595000  |        |  |
| Suriname           | Maize                    | 2018 | tonnes | 85      |        |  |
| Suriname           | Rice,paddy               | 2018 | tonnes | 273916  |        |  |
| Suriname           | Soybeans                 | 2018 | tonnes | 7       |        |  |
| Sweden             | Apples                   | 2018 | tonnes | 30610   |        |  |
| Sweden             | Barley                   | 2018 | tonnes | 1094400 |        |  |
| Sweden             | Peas,dry                 | 2018 | tonnes | 48430   |        |  |
| Sweden             | Potatoes                 | 2018 | tonnes | 720200  |        |  |
| Sweden             | Wheat                    | 2018 | tonnes | 1620300 |        |  |
| Switzerland        | Apples                   | 2018 | tonnes | 222431  |        |  |
| Switzerland        | Barley                   | 2018 | tonnes | 182120  |        |  |
| Switzerland        | Grapes                   | 2018 | tonnes | 107776  |        |  |
| Switzerland        | Maize                    | 2018 | tonnes | 134834  |        |  |
| Switzerland        | Peas,dry                 | 2018 | tonnes | 16132   |        |  |
| Switzerland        | Potatoes                 | 2018 | tonnes | 417156  |        |  |
| Switzerland        | Pumpkins,squashandgourds | 2018 | tonnes |         | 13320  |  |
| Switzerland        | Soybeans                 | 2018 | tonnes | 5206    |        |  |
| Switzerland        | Wheat                    | 2018 | tonnes | 497250  |        |  |
| SyrianArabRepublic | Apples                   | 2018 | tonnes | 352504  |        |  |
| SyrianArabRepublic | Barley                   | 2018 | tonnes | 390000  |        |  |
| SyrianArabRepublic | Grapes                   | 2018 | tonnes | 196000  |        |  |
| SyrianArabRepublic | Maize                    | 2018 | tonnes | 118000  |        |  |
| SyrianArabRepublic | Peas,dry                 | 2018 | tonnes | 3200    |        |  |
| SyrianArabRepublic | Pistachios               | 2018 | tonnes | 28800   |        |  |
| SyrianArabRepublic | Potatoes                 | 2018 | tonnes | 540000  |        |  |
| SyrianArabRepublic | Pumpkins,squashandgourds | 2018 | tonnes |         | 92700  |  |
| SyrianArabRepublic | Rice,paddy               | 2018 | tonnes | 0       |        |  |
| SyrianArabRepublic | Soybeans                 | 2018 | tonnes | 300     |        |  |
| SyrianArabRepublic | Wheat                    | 2018 | tonnes | 1200000 |        |  |
| Tajikistan         | Apples                   | 2018 | tonnes | 238651  |        |  |
| Tajikistan         | Barley                   | 2018 | tonnes | 108817  |        |  |
| Tajikistan         | Grapes                   | 2018 | tonnes | 241892  |        |  |
| Tajikistan         | Maize                    | 2018 | tonnes | 237355  |        |  |
| Tajikistan         | Peas,dry                 | 2018 | tonnes | 9922    |        |  |
| Tajikistan         | Potatoes                 | 2018 | tonnes | 964644  |        |  |
| Tajikistan         | Rice,paddy               | 2018 | tonnes | 90446   |        |  |
| Tajikistan         | Safflowerseed            | 2018 | tonnes | 4342    |        |  |
| Tajikistan         | Soybeans                 | 2018 | tonnes | 26      |        |  |
| Tajikistan         | Wheat                    | 2018 | tonnes | 778986  |        |  |
| Thailand           | Barley                   | 2018 | tonnes | 28288   |        |  |
| Thailand           | Grapes                   | 2018 | tonnes | 82820   |        |  |
| Thailand           | Maize                    | 2018 | tonnes | 5004125 |        |  |
| Thailand           | Potatoes                 | 2018 | tonnes | 125106  |        |  |

|                   |                          |      |        |          |  |
|-------------------|--------------------------|------|--------|----------|--|
| Thailand          | Pumpkins,squashandgourds | 2018 | tonnes | 120851   |  |
| Thailand          | Rice,paddy               | 2018 | tonnes | 32192087 |  |
| Thailand          | Soybeans                 | 2018 | tonnes | 56000    |  |
| Thailand          | Wheat                    | 2018 | tonnes | 1351     |  |
| Timor-Leste       | Maize                    | 2018 | tonnes | 101564   |  |
| Timor-Leste       | Potatoes                 | 2018 | tonnes | 1167     |  |
| Timor-Leste       | Rice,paddy               | 2018 | tonnes | 86647    |  |
| Timor-Leste       | Soybeans                 | 2018 | tonnes | 1008     |  |
| Togo              | Maize                    | 2018 | tonnes | 886630   |  |
| Togo              | Rice,paddy               | 2018 | tonnes | 145489   |  |
| Togo              | Soybeans                 | 2018 | tonnes | 1559     |  |
| Tonga             | Pumpkins,squashandgourds | 2018 | tonnes | 20738    |  |
| TrinidadandTobago | Maize                    | 2018 | tonnes | 2781     |  |
| TrinidadandTobago | Pumpkins,squashandgourds | 2018 | tonnes | 4565     |  |
| TrinidadandTobago | Rice,paddy               | 2018 | tonnes | 586      |  |
| Tunisia           | Apples                   | 2018 | tonnes | 114222   |  |
| Tunisia           | Barley                   | 2018 | tonnes | 700000   |  |
| Tunisia           | Grapes                   | 2018 | tonnes | 146860   |  |
| Tunisia           | Peas,dry                 | 2018 | tonnes | 5050     |  |
| Tunisia           | Pistachios               | 2018 | tonnes | 1958     |  |
| Tunisia           | Potatoes                 | 2018 | tonnes | 423800   |  |
| Tunisia           | Pumpkins,squashandgourds | 2018 | tonnes | 95506    |  |
| Tunisia           | Wheat                    | 2018 | tonnes | 1500000  |  |
| Turkey            | Apples                   | 2018 | tonnes | 3625960  |  |
| Turkey            | Barley                   | 2018 | tonnes | 7000000  |  |
| Turkey            | Grapes                   | 2018 | tonnes | 3933000  |  |
| Turkey            | Maize                    | 2018 | tonnes | 5700000  |  |
| Turkey            | Peas,dry                 | 2018 | tonnes | 2603     |  |
| Turkey            | Pistachios               | 2018 | tonnes | 240000   |  |
| Turkey            | Potatoes                 | 2018 | tonnes | 4550000  |  |
| Turkey            | Pumpkins,squashandgourds | 2018 | tonnes | 616777   |  |
| Turkey            | Rice,paddy               | 2018 | tonnes | 940000   |  |
| Turkey            | Safflowerseed            | 2018 | tonnes | 35000    |  |
| Turkey            | Soybeans                 | 2018 | tonnes | 140000   |  |
| Turkey            | Wheat                    | 2018 | tonnes | 20000000 |  |
| Turkmenistan      | Apples                   | 2018 | tonnes | 63398    |  |
| Turkmenistan      | Barley                   | 2018 | tonnes | 18969    |  |
| Turkmenistan      | Grapes                   | 2018 | tonnes | 239958   |  |
| Turkmenistan      | Maize                    | 2018 | tonnes | 40000    |  |
| Turkmenistan      | Peas,dry                 | 2018 | tonnes | 12904    |  |
| Turkmenistan      | Potatoes                 | 2018 | tonnes | 293533   |  |
| Turkmenistan      | Rice,paddy               | 2018 | tonnes | 130000   |  |
| Turkmenistan      | Wheat                    | 2018 | tonnes | 1000000  |  |
| Uganda            | Maize                    | 2018 | tonnes | 2964017  |  |
| Uganda            | Peas,dry                 | 2018 | tonnes | 15626    |  |
| Uganda            | Potatoes                 | 2018 | tonnes | 162151   |  |
| Uganda            | Rice,paddy               | 2018 | tonnes | 260786   |  |
| Uganda            | Soybeans                 | 2018 | tonnes | 29000    |  |
| Uganda            | Wheat                    | 2018 | tonnes | 23597    |  |
| Ukraine           | Apples                   | 2018 | tonnes | 1462360  |  |
| Ukraine           | Barley                   | 2018 | tonnes | 7349140  |  |
| Ukraine           | Grapes                   | 2018 | tonnes | 467630   |  |
| Ukraine           | Maize                    | 2018 | tonnes | 35801050 |  |
| Ukraine           | Peas,dry                 | 2018 | tonnes | 775600   |  |
| Ukraine           | Potatoes                 | 2018 | tonnes | 22503970 |  |
| Ukraine           | Pumpkins,squashandgourds | 2018 | tonnes | 1338000  |  |

|                    |                          |      |        |           |  |  |
|--------------------|--------------------------|------|--------|-----------|--|--|
| Ukraine            | Rice,paddy               | 2018 | tonnes | 69210     |  |  |
| Ukraine            | Safflowerseed            | 2018 | tonnes | 109       |  |  |
| Ukraine            | Soybeans                 | 2018 | tonnes | 4460770   |  |  |
| Ukraine            | Wheat                    | 2018 | tonnes | 24652840  |  |  |
| UnitedArabEmirates | Barley                   | 2018 | tonnes | 114       |  |  |
| UnitedArabEmirates | Grapes                   | 2018 | tonnes | 31        |  |  |
| UnitedArabEmirates | Maize                    | 2018 | tonnes | 8942      |  |  |
| UnitedArabEmirates | Potatoes                 | 2018 | tonnes | 451       |  |  |
| UnitedArabEmirates | Pumpkins,squashandgourds | 2018 | tonnes | 20501     |  |  |
| UnitedArabEmirates | Wheat                    | 2018 | tonnes |           |  |  |
| UK                 | Apples                   | 2018 | tonnes | 502700    |  |  |
| UK                 | Barley                   | 2018 | tonnes | 6510000   |  |  |
| UK                 | Grapes                   | 2018 | tonnes | 587       |  |  |
| UK                 | Peas,dry                 | 2018 | tonnes | 106700    |  |  |
| UK                 | Potatoes                 | 2018 | tonnes | 5028000   |  |  |
| UK                 | Wheat                    | 2018 | tonnes | 13555000  |  |  |
| Tanzania           | Barley                   | 2018 | tonnes | 12422     |  |  |
| Tanzania           | Grapes                   | 2018 | tonnes | 4744      |  |  |
| Tanzania           | Maize                    | 2018 | tonnes | 5986905   |  |  |
| Tanzania           | Peas,dry                 | 2018 | tonnes | 115391    |  |  |
| Tanzania           | Potatoes                 | 2018 | tonnes | 1768154   |  |  |
| Tanzania           | Rice,paddy               | 2018 | tonnes | 3016695   |  |  |
| Tanzania           | Safflowerseed            | 2018 | tonnes | 15591     |  |  |
| Tanzania           | Soybeans                 | 2018 | tonnes | 5993      |  |  |
| Tanzania           | Wheat                    | 2018 | tonnes | 104870    |  |  |
| USA                | Apples                   | 2018 | tonnes | 4652500   |  |  |
| USA                | Barley                   | 2018 | tonnes | 3332970   |  |  |
| USA                | Grapes                   | 2018 | tonnes | 6890970   |  |  |
| USA                | Maize                    | 2018 | tonnes | 392450840 |  |  |
| USA                | Peas,dry                 | 2018 | tonnes | 722530    |  |  |
| USA                | Pistachios               | 2018 | tonnes | 447700    |  |  |
| USA                | Potatoes                 | 2018 | tonnes | 20607342  |  |  |
| USA                | Pumpkins,squashandgourds | 2018 | tonnes | 683038    |  |  |
| USA                | Rice,paddy               | 2018 | tonnes | 10170040  |  |  |
| USA                | Safflowerseed            | 2018 | tonnes | 107220    |  |  |
| USA                | Soybeans                 | 2018 | tonnes | 123664230 |  |  |
| USA                | Wheat                    | 2018 | tonnes | 51286540  |  |  |
| Uruguay            | Apples                   | 2018 | tonnes | 48434     |  |  |
| Uruguay            | Barley                   | 2018 | tonnes | 637800    |  |  |
| Uruguay            | Grapes                   | 2018 | tonnes | 104932    |  |  |
| Uruguay            | Maize                    | 2018 | tonnes | 816000    |  |  |
| Uruguay            | Peas,dry                 | 2018 | tonnes | 2735      |  |  |
| Uruguay            | Potatoes                 | 2018 | tonnes | 87000     |  |  |
| Uruguay            | Pumpkins,squashandgourds | 2018 | tonnes | 26038     |  |  |
| Uruguay            | Rice,paddy               | 2018 | tonnes | 1360000   |  |  |
| Uruguay            | Soybeans                 | 2018 | tonnes | 1334000   |  |  |
| Uruguay            | Wheat                    | 2018 | tonnes | 440000    |  |  |
| Uzbekistan         | Apples                   | 2018 | tonnes | 1130335   |  |  |
| Uzbekistan         | Barley                   | 2018 | tonnes | 111760    |  |  |
| Uzbekistan         | Grapes                   | 2018 | tonnes | 1589784   |  |  |
| Uzbekistan         | Maize                    | 2018 | tonnes | 413165    |  |  |
| Uzbekistan         | Peas,dry                 | 2018 | tonnes | 3081      |  |  |
| Uzbekistan         | Pistachios               | 2018 | tonnes | 596       |  |  |
| Uzbekistan         | Potatoes                 | 2018 | tonnes | 2911933   |  |  |
| Uzbekistan         | Rice,paddy               | 2018 | tonnes | 221089    |  |  |
| Uzbekistan         | Safflowerseed            | 2018 | tonnes | 4212      |  |  |



|                                 |                          |      |        |          |  |  |
|---------------------------------|--------------------------|------|--------|----------|--|--|
| Uzbekistan                      | Soybeans                 | 2018 | tonnes | 11399    |  |  |
| Uzbekistan                      | Wheat                    | 2018 | tonnes | 5410760  |  |  |
| Vanuatu                         | Maize                    | 2018 | tonnes | 917      |  |  |
| Venezuela(BolivarianRepublicof) | Grapes                   | 2018 | tonnes | 19798    |  |  |
| Venezuela(BolivarianRepublicof) | Maize                    | 2018 | tonnes | 1318418  |  |  |
| Venezuela(BolivarianRepublicof) | Peas,dry                 | 2018 | tonnes | 180      |  |  |
| Venezuela(BolivarianRepublicof) | Potatoes                 | 2018 | tonnes | 371744   |  |  |
| Venezuela(BolivarianRepublicof) | Pumpkins,squashandgourds | 2018 | tonnes | 97771    |  |  |
| Venezuela(BolivarianRepublicof) | Rice,paddy               | 2018 | tonnes | 494549   |  |  |
| Venezuela(BolivarianRepublicof) | Soybeans                 | 2018 | tonnes | 6000     |  |  |
| Venezuela(BolivarianRepublicof) | Wheat                    | 2018 | tonnes | 144      |  |  |
| VietNam                         | Grapes                   | 2018 | tonnes | 25165    |  |  |
| VietNam                         | Maize                    | 2018 | tonnes | 4874054  |  |  |
| VietNam                         | Potatoes                 | 2018 | tonnes | 376377   |  |  |
| VietNam                         | Rice,paddy               | 2018 | tonnes | 44046250 |  |  |
| VietNam                         | Soybeans                 | 2018 | tonnes | 81348    |  |  |
| WesternSahara                   | Barley                   | 2018 | tonnes | 1857     |  |  |
| Yemen                           | Apples                   | 2018 | tonnes | 16931    |  |  |
| Yemen                           | Barley                   | 2018 | tonnes | 19667    |  |  |
| Yemen                           | Grapes                   | 2018 | tonnes | 136227   |  |  |
| Yemen                           | Maize                    | 2018 | tonnes | 42986    |  |  |
| Yemen                           | Peas,dry                 | 2018 | tonnes | 2417     |  |  |
| Yemen                           | Potatoes                 | 2018 | tonnes | 248889   |  |  |
| Yemen                           | Pumpkins,squashandgourds | 2018 | tonnes | 13052    |  |  |
| Yemen                           | Wheat                    | 2018 | tonnes | 105503   |  |  |
| Zambia                          | Barley                   | 2018 | tonnes | 8767     |  |  |
| Zambia                          | Maize                    | 2018 | tonnes | 2394907  |  |  |
| Zambia                          | Potatoes                 | 2018 | tonnes | 13546    |  |  |
| Zambia                          | Rice,paddy               | 2018 | tonnes | 43063    |  |  |
| Zambia                          | Soybeans                 | 2018 | tonnes | 302720   |  |  |
| Zambia                          | Wheat                    | 2018 | tonnes | 114463   |  |  |
| Zimbabwe                        | Apples                   | 2018 | tonnes | 6466     |  |  |
| Zimbabwe                        | Barley                   | 2018 | tonnes | 55854    |  |  |
| Zimbabwe                        | Grapes                   | 2018 | tonnes | 3443     |  |  |
| Zimbabwe                        | Maize                    | 2018 | tonnes | 730437   |  |  |
| Zimbabwe                        | Potatoes                 | 2018 | tonnes | 60521    |  |  |
| Zimbabwe                        | Rice,paddy               | 2018 | tonnes | 755      |  |  |
| Zimbabwe                        | Soybeans                 | 2018 | tonnes | 90000    |  |  |
| Zimbabwe                        | Wheat                    | 2018 | tonnes | 41488    |  |  |

```

;
run
;

proc
;
means;
run
;

```

| data           | corona;     |              |               |              |     |        |         |       |       |     |
|----------------|-------------|--------------|---------------|--------------|-----|--------|---------|-------|-------|-----|
| input          | num country |              |               |              |     |        |         |       |       |     |
| TotalRecovered | ActiveCases | SeriousCases | TotCases1mpop | Deaths1mpop; |     |        |         |       |       |     |
| cards          | ;           |              |               |              |     |        |         |       |       |     |
| 1              | USA         | 1837578      | 408           | 106198       | 3   | 599875 | 1131505 | 17075 | 5554  |     |
| 2              | Brazil      | 514992       | 143           | 29341        | 27  | 206555 | 279096  | 8318  | 2424  |     |
| 3              | Russia      | 414878       | 9035          | 4855         | 162 | 175877 | 234146  | 2300  | 2843  |     |
| 4              | Spain       | 286509       | .             | 27127        | .   | 196958 | 62424   | 617   | 6128  | 580 |
| 5              | UK          | 274762       | .             | 38489        | .   | .      | 1559    | 4049  | 567   |     |
| 6              | Italy       | 232997       | .             | 33415        | .   | 157507 | 42075   | 435   | 3853  | 553 |
| 7              | India       | 191327       | 718           | 5413         | 5   | 92027  | 93887   | 8944  | 139   | 4   |
| 8              | France      | 188882       | .             | 28802        | .   | 68355  | 91725   | 1319  | 2894  | 441 |
| 9              | Germany     | 183494       | .             | 8605         | .   | 165900 | 8989    | 702   | 2191  | 103 |
| 10             | Peru        | 164476       | .             | 4506         | .   | 67208  | 92762   | 988   | 4994  | 137 |
| 11             | Turkey      | 163942       | .             | 4540         | .   | 127973 | 31429   | 648   | 1946  | 54  |
| 12             | Iran        | 154445       | 2979          | 7878         | 81  | 121004 | 25563   | 2578  | 1841  | 9   |
| 13             | Chile       | 99688        | .             | 1054         | .   | 42727  | 55907   | 1383  | 5219  | 55  |
| 14             | Canada      | 90947        | .             | 7295         | .   | 48879  | 34773   | 1641  | 2411  | 193 |
| 15             | Mexico      | 90664        | 3152          | 9930         | 151 | 64326  | 16408   | 378   | 704   | 77  |
| 16             | SaudiArabia | 85261        | .             | 503          | .   | 62442  | 22316   | 384   | 2452  | 14  |
| 17             | China       | 83017        | 16            | 4634         | .   | 78307  | 76      | 3     | 58    | 3   |
| 18             | Pakistan    | 72460        | 2964          | 1543         | 60  | 26083  | 44834   | 111   | 329   | 7   |
| 19             | Belgium     | 58517        | 136           | 9486         | 19  | 15919  | 33112   | 163   | 5051  | 81  |
| 20             | Qatar       | 56910        | .             | 38           | .   | 30290  | 26582   | 232   | 19783 | 13  |
| 21             | Bangladesh  | 49534        | 2381          | 672          | 22  | 10597  | 38265   | 1     | 301   | 4   |
| 22             | Netherlands | 46442        | .             | 5956         | .   | .      | .       | 159   | 2711  | 348 |
| 23             | Belarus     | 42556        | .             | 235          | .   | 18514  | 23807   | 92    | 4503  | 25  |
| 24             | Ecuador     | 39098        | .             | 3358         | .   | 19592  | 16148   | 220   | 2219  | 191 |
| 25             | Sweden      | 37542        | .             | 4395         | .   | 4971   | 28176   | 228   | 3719  | 435 |
| 26             | Singapore   | 35292        | 408           | 23           | .   | 21699  | 13570   | 8     | 6036  | 4   |
| 27             | UAE         | 34557        | .             | 264          | .   | 17932  | 16361   | 1     | 3498  | 27  |
| 28             | SouthAfrica | 32683        | .             | 683          | .   | 16809  | 15191   | 128   | 552   | 12  |
| 29             | Portugal    | 32500        | .             | 1410         | .   | 19409  | 11681   | 64    | 3187  | 138 |
| 30             | Switzerland | 30871        | 9             | 1920         | .   | 28500  | 451     | 28    | 3569  | 222 |
| 31             | Colombia    | 29383        | .             | 939          | .   | 8543   | 19901   | 136   | 578   | 18  |
| 32             | Kuwait      | 27762        | 719           | 220          | 8   | 12899  | 14643   | 204   | 6509  | 52  |
| 33             | Indonesia   | 26940        | 467           | 1641         | 28  | 7637   | 17662   | .     | 99    | 6   |
| 34             | Ireland     | 24990        | .             | 1652         | .   | 22089  | 1249    | 36    | 5066  | 335 |
| 35             | Egypt       | 24985        | .             | 959          | .   | 6037   | 17989   | 41    | 245   | 9   |
| 36             | Ukraine     | 24012        | 340           | 718          | 10  | 9690   | 13604   | 283   | 549   | 16  |
| 37             | Poland      | 23987        | 201           | 1065         | 1   | 11449  | 11473   | 160   | 634   | 28  |
| 38             | Romania     | 19398        | 141           | 1270         | 4   | 13426  | 4702    | 159   | 1008  | 66  |
| 39             | Philippines | 18638        | 552           | 960          | 3   | 3979   | 13699   | 73    | 170   | 9   |
| 40             | dominr      | 17285        | .             | 502          | .   | 10559  | 6224    | 110   | 1595  | 46  |
| 41             | Israel      | 17106        | 35            | 285          | .   | 14826  | 1995    | 33    | 1860  | 31  |
| 42             | Japan       | 16851        | .             | 891          | .   | 14459  | 1501    | 119   | 133   | 7   |
| 43             | Argentina   | 16851        | .             | 539          | .   | 5336   | 10976   | 259   | 373   | 12  |
| 44             | Austria     | 16731        | .             | 668          | .   | 15593  | 470     | 27    | 1859  | 74  |
| 45             | Afghanistan | 15750        | 545           | 265          | 8   | 1428   | 14057   | 19    | 405   | 7   |
| 46             | Panama      | 13463        | .             | 336          | .   | 9514   | 3613    | 79    | 3125  | 78  |
| 47             | Oman        | 12223        | 786           | 50           | 1   | 2682   | 9491    | 31    | 2399  | 10  |
| 48             | Denmark     | 11669        | .             | 574          | .   | 10362  | 733     | 20    | 2015  | 99  |

|     |                      |       |     |     |    |       |      |     |      |     |
|-----|----------------------|-------|-----|-----|----|-------|------|-----|------|-----|
| 49  | S.Korea              | 11503 | 35  | 271 | 1  | 10422 | 810  | 15  | 224  | 5   |
| 50  | Serbia               | 11412 | .   | 243 | .  | 6698  | 4471 | 10  | 1306 | 28  |
| 51  | Bahrain              | 11398 | .   | 19  | .  | 6673  | 4706 | 12  | 6721 | 11  |
| 52  | Kazakhstan           | 11308 | 450 | 41  | 1  | 5404  | 5863 | 62  | 603  | 2   |
| 53  | Nigeria              | 10162 | .   | 287 | .  | 3007  | 6868 | 7   | 49   | 1   |
| 54  | Bolivia              | 9982  | 390 | 313 | 3  | 968   | 8701 | 3   | 856  | 27  |
| 55  | Armenia              | 9492  | 210 | 139 | 8  | 3402  | 5951 | 10  | 3204 | 47  |
| 56  | Algeria              | 9394  | .   | 653 | .  | 5748  | 2993 | 23  | 215  | 15  |
| 57  | Czechia              | 9273  | 5   | 320 | .  | 6562  | 2391 | 15  | 866  | 30  |
| 58  | Norway               | 8440  | .   | 236 | .  | 7727  | 477  | 8   | 1558 | 44  |
| 59  | Moldova              | 8251  | .   | 295 | .  | 4581  | 3375 | 251 | 2045 | 73  |
| 60  | Ghana                | 8070  | 189 | 36  | .  | 2947  | 5087 | 3   | 260  | 1   |
| 61  | Malaysia             | 7857  | 38  | 115 | .  | 6404  | 1338 | 8   | 243  | 4   |
| 62  | Morocco              | 7819  | 12  | 205 | .  | 5754  | 1860 | 18  | 212  | 6   |
| 63  | Australia            | 7204  | 9   | 103 | .  | 6619  | 482  | 3   | 283  | 4   |
| 64  | Finland              | 6885  | 26  | 320 | .  | 5500  | 1065 | 10  | 1243 | 58  |
| 65  | Iraq                 | 6439  | .   | 205 | .  | 3156  | 3078 | 36  | 160  | 5   |
| 66  | Cameroon             | 5904  | .   | 191 | .  | 3568  | 2145 | 28  | 223  | 7   |
| 67  | Azerbaijan           | 5494  | .   | 63  | .  | 3428  | 2003 | 42  | 542  | 6   |
| 68  | Honduras             | 5202  | 108 | 212 | 11 | 537   | 4453 | 13  | 526  | 21  |
| 69  | Guatemala            | 5087  | 348 | 108 | 6  | 735   | 4244 | 5   | 284  | 6   |
| 70  | Sudan                | 5026  | .   | 286 | .  | 1423  | 3317 | .   | 115  | 7   |
| 71  | Luxembourg           | 4018  | .   | 110 | .  | 3833  | 75   | 3   | 6428 | 176 |
| 72  | Tajikistan           | 3930  | .   | 47  | .  | 2004  | 1879 | .   | 413  | 5   |
| 73  | Hungary              | 3892  | 16  | 527 | 1  | 2156  | 1209 | 25  | 403  | 55  |
| 74  | Senegal              | 3739  | 94  | 42  | .  | 1858  | 1839 | 14  | 224  | 3   |
| 75  | Guinea               | 3706  | .   | 23  | .  | 2030  | 1653 | 24  | 283  | 2   |
| 76  | Uzbekistan           | 3662  | 39  | 15  | .  | 2837  | 810  | 9   | 110  | 0   |
| 77  | Djibouti             | 3354  | .   | 24  | .  | 1504  | 1826 | .   | 3399 | 24  |
| 78  | Thailand             | 3082  | 1   | 57  | .  | 2965  | 60   | 1   | 44   | 1   |
| 79  | DRC                  | 3070  | .   | 72  | .  | 448   | 2550 | .   | 34   | 1   |
| 80  | Greece               | 2917  | .   | 175 | .  | 1374  | 1368 | 13  | 280  | 17  |
| 81  | IvoryCoast           | 2833  | .   | 33  | .  | 1435  | 1365 | .   | 108  | 1   |
| 82  | Gabon                | 2655  | .   | 17  | .  | 722   | 1916 | 15  | 1195 | 8   |
| 83  | ElSalvador           | 2582  | 65  | 46  | .  | 1063  | 1473 | 53  | 398  | 7   |
| 84  | BosniaandHerzegovina | 2524  | 14  | 154 | 1  | 1888  | 482  | 4   | 769  |     |
| 85  | Bulgaria             | 2519  | 6   | 140 | .  | 1090  | 1289 | 17  | 362  | 20  |
| 86  | Croatia              | 2246  | .   | 103 | .  | 2072  | 71   | 4   | 547  | 25  |
| 87  | NorthMacedonia       | 2226  | .   | 133 | .  | 1552  | 541  | 21  | 1068 | 64  |
| 88  | Haiti                | 2124  | 259 | 44  | 3  | 24    | 2056 | .   | 186  | 4   |
| 89  | Cuba                 | 2045  | .   | 83  | .  | 1809  | 153  | 4   | 181  | 7   |
| 90  | Somalia              | 1976  | .   | 78  | .  | 348   | 1550 | 2   | 125  | 5   |
| 91  | Kenya                | 1962  | .   | 64  | .  | 478   | 1420 | 7   | 37   | 1   |
| 92  | Estonia              | 1870  | 1   | 68  | .  | 1625  | 177  | .   | 1410 | 51  |
| 93  | Kyrgyzstan           | 1817  | 69  | 16  | .  | 1181  | 620  | 4   | 279  | 2   |
| 94  | Iceland              | 1806  | .   | 10  | .  | 1794  | 2    | .   | 5295 | 29  |
| 95  | Nepal                | 1798  | 226 | 8   | .  | 221   | 1569 | .   | 62   | 0   |
| 96  | Maldives             | 1773  | .   | 5   | .  | 453   | 1315 | 9   | 3285 | 9   |
| 97  | Mayotte              | 1699  | .   | 21  | .  | 1385  | 293  | 9   | 6242 | 77  |
| 98  | Lithuania            | 1678  | 3   | 70  | .  | 1236  | 372  | 17  | 616  | 26  |
| 99  | SriLanka             | 1633  | .   | 11  | 1  | 801   | 821  | 1   | 76   | 1   |
| 100 | Slovakia             | 1522  | 1   | 28  | .  | 1368  | 126  | .   | 279  | 5   |
| 101 | Venezuela            | 1510  | .   | 14  | .  | 302   | 1194 | 3   | 53   | 1   |
| 102 | NewZealand           | 1504  | .   | 22  | .  | 1481  | 1    | .   | 301  | 4   |
| 103 | Slovenia             | 1473  | .   | 109 | 1  | 1358  | 6    | 1   | 709  | 52  |
| 104 | EquatorialGuinea     | 1306  | .   | 12  | .  | 200   | 1094 | .   | 934  | 9   |

|     |                    |      |    |    |   |      |      |    |       |      |
|-----|--------------------|------|----|----|---|------|------|----|-------|------|
| 105 | Mali               | 1265 | .  | 77 | . | 716  | 472  | .  | 63    | 4    |
| 106 | Guinea-Bissau      | 1256 | .  | 8  | . | 42   | 1206 | .  | 640   | 4    |
| 107 | Lebanon            | 1220 | .  | 27 | . | 712  | 481  | 3  | 179   | 4    |
| 108 | Ethiopia           | 1172 | .  | 11 | . | 209  | 952  | 4  | 10    | 0    |
| 109 | Albania            | 1143 | 6  | 33 | . | 877  | 233  | 3  | 397   | 11   |
| 110 | Zambia             | 1089 | 32 | 7  | . | 912  | 170  | 1  | 59    | 0    |
| 111 | HongKong           | 1088 | 3  | 4  | . | 1037 | 47   | 2  | 145   | 1    |
| 112 | Tunisia            | 1084 | 7  | 48 | . | 964  | 72   | 2  | 92    | 4    |
| 113 | Latvia             | 1066 | .  | 24 | . | 745  | 297  | 3  | 565   | 13   |
| 114 | CostaRica          | 1056 | .  | 10 | . | 669  | 377  | 4  | 207   | 2    |
| 115 | CAR                | 1011 | .  | 2  | . | 23   | 986  | .  | 210   | 0    |
| 116 | SouthSudan         | 994  | .  | 10 | . | 6    | 978  | .  | 89    | 1    |
| 117 | Paraguay           | 986  | .  | 11 | . | 477  | 498  | 2  | 138   | 2    |
| 118 | Niger              | 958  | .  | 64 | . | 839  | 55   | .  | 40    | 3    |
| 119 | Cyprus             | 944  | .  | 17 | . | 790  | 137  | 4  | 782   | 14   |
| 120 | SierraLeone        | 861  | .  | 46 | . | 454  | 361  | .  | 108   | 6    |
| 121 | BurkinaFaso        | 847  | .  | 53 | . | 720  | 74   | .  | 41    | 3    |
| 122 | Madagascar         | 826  | 55 | 6  | . | 174  | 646  | 8  | 30    | 0    |
| 123 | Uruguay            | 823  | .  | 22 | . | 685  | 116  | 5  | 237   | 6    |
| 124 | Georgia            | 794  | 11 | 12 | . | 624  | 158  | 6  | 199   | 3    |
| 125 | Chad               | 778  | .  | 65 | . | 491  | 222  | .  | 47    | 4    |
| 126 | Andorra            | 764  | .  | 51 | . | 694  | 19   | 4  | 9889  | 660  |
| 127 | Nicaragua          | 759  | .  | 35 | . | 370  | 354  | .  | 115   | 5    |
| 128 | Jordan             | 739  | .  | 9  | . | 522  | 208  | 5  | 72    | 1    |
| 129 | DiamondPrincess    | 712  | .  | 13 | . | 651  | 48   | 4  | .     | .    |
| 130 | SanMarino          | 671  | .  | 42 | . | 359  | 270  | 1  | 19779 | 1238 |
| 131 | Malta              | 619  | 1  | 9  | . | 537  | 73   | 1  | 1402  | 20   |
| 132 | Congo              | 611  | .  | 20 | . | 179  | 412  | .  | 111   | 4    |
| 133 | Jamaica            | 586  | 5  | 9  | . | 311  | 266  | 2  | 198   | 3    |
| 134 | ChannelIslands     | 560  | .  | 45 | . | 515  | 0    | .  | 3223  | 259  |
| 135 | Mauritania         | 530  | .  | 23 | . | 27   | 480  | .  | 114   | 5    |
| 136 | Tanzania           | 509  | .  | 21 | . | 183  | 305  | 7  | 9     | 0    |
| 137 | FrenchGuiana       | 499  | .  | 1  | . | 200  | 298  | 2  | 1675  | 3    |
| 138 | SaoTomeandPrincipe | 483  | .  | 12 | . | 68   | 403  | .  | 2208  | 55   |
| 139 | Réunion            | 471  | .  | 1  | . | 411  | 59   | 1  | 526   | 1    |
| 140 | Uganda             | 457  | 40 | .  | . | 72   | 385  | .  | 10    | .    |
| 141 | Palestine          | 449  | 1  | 3  | . | 372  | 74   | .  | 88    | 1    |
| 142 | Taiwan             | 443  | 1  | 7  | . | 427  | 9    | .  | 19    | 0    |
| 143 | Togo               | 442  | .  | 13 | . | 211  | 218  | .  | 54    | 2    |
| 144 | CaboVerde          | 435  | .  | 4  | . | 193  | 238  | .  | 783   | 7    |
| 145 | Rwanda             | 370  | .  | 1  | . | 256  | 113  | .  | 29    | 0    |
| 146 | IsleofMan          | 336  | .  | 24 | . | 309  | 3    | .  | 3953  | 282  |
| 147 | Mauritius          | 335  | .  | 10 | . | 322  | 3    | .  | 263   | 8    |
| 148 | Vietnam            | 328  | .  | .  | . | 293  | 35   | 1  | 3     | .    |
| 149 | Montenegro         | 324  | .  | 9  | . | 315  | 0    | .  | 516   | 14   |
| 150 | Yemen              | 323  | .  | 80 | . | 14   | 229  | .  | 11    | 3    |
| 151 | Liberia            | 288  | .  | 27 | . | 157  | 104  | .  | 57    | 5    |
| 152 | Eswatini           | 285  | .  | 2  | . | 189  | 94   | .  | 246   | 2    |
| 153 | Malawi             | 284  | .  | 4  | . | 42   | 238  | 1  | 15    | 0    |
| 154 | Mozambique         | 254  | .  | 2  | . | 91   | 161  | .  | 8     | 0    |
| 155 | Benin              | 232  | .  | 3  | . | 143  | 86   | .  | 19    | 0    |
| 156 | Myanmar            | 228  | 4  | 6  | . | 138  | 84   | .  | 4     | 0    |
| 157 | Martinique         | 200  | .  | 14 | . | 98   | 88   | .  | 533   | 37   |
| 158 | FaeroeIslands      | 187  | .  | .  | . | 187  | 0    | .  | 3828  | .    |
| 159 | Mongolia           | 185  | 6  | .  | . | 44   | 141  | 19 | 57    | .    |
| 160 | Zimbabwe           | 178  | .  | 4  | . | 29   | 145  | .  | 12    | 0    |

|     |                      |     |   |    |   |     |     |    |       |      |    |
|-----|----------------------|-----|---|----|---|-----|-----|----|-------|------|----|
| 161 | Gibraltar            | 170 | . | .  | . | 151 | 19  | .  | 5046  | .    |    |
| 162 | Guadeloupe           | 162 | . | 14 | . | 138 | 10  | 1  | 405   | 35   |    |
| 163 | Libya                | 156 | . | 5  | . | 52  | 99  | .  | 23    | 1    |    |
| 164 | Guyana               | 153 | . | 12 | . | 70  | 71  | 2  | 195   | 15   |    |
| 165 | Brunei               | 141 | . | 2  | . | 138 | 1   | 1  | 323   | 5    |    |
| 166 | CaymanIslands        | 141 | . | 1  | . | 68  | 72  | .  | 2148  | 15   |    |
| 167 | Bermuda              | 140 | . | 9  | . | 92  | 39  | 2  | 2247  | 144  |    |
| 168 | Cambodia             | 125 | . | .  | . | 123 | 2   | 1  | 7     | .    |    |
| 169 | Syria                | 122 | . | 5  | . | 46  | 71  | .  | 7     | 0    |    |
| 170 | TrinidadandTobago    | 117 | . | .  | 8 | .   | 108 | 1  | .     | 84   | 6  |
| 171 | Comoros              | 106 | . | 2  | . | 26  | 78  | .  | 122   | 2    |    |
| 172 | Bahamas              | 102 | . | 11 | . | 48  | 43  | 1  | 260   | 28   |    |
| 173 | Aruba                | 101 | . | 3  | . | 98  | 0   | .  | 946   | 28   |    |
| 174 | Monaco               | 99  | . | 4  | . | 90  | 5   | 1  | 2524  | 102  |    |
| 175 | Barbados             | 92  | . | 7  | . | 76  | 9   | 1  | 320   | 24   |    |
| 176 | Angola               | 86  | . | 4  | . | 18  | 64  | 1  | 3     | 0    |    |
| 177 | Liechtenstein        | 82  | . | 1  | . | 55  | 26  | .  | 2151  | 26   |    |
| 178 | SintMaarten          | 77  | . | 15 | . | 60  | 2   | 1  | 1798  | 350  |    |
| 179 | Burundi              | 63  | . | 1  | . | 33  | 29  | .  | 5     | 0    |    |
| 180 | FrenchPolynesia      | 60  | . | .  | . | .   | 60  | 0  | .     | 214  | .  |
| 181 | Macao                | 45  | . | .  | . | 45  | 0   | .  | 69    | .    |    |
| 182 | Bhutan               | 43  | . | .  | . | 6   | 37  | .  | 56    | .    |    |
| 183 | SaintMartin          | 41  | . | 3  | . | 33  | 5   | 1  | 1062  | 78   |    |
| 184 | Eritrea              | 39  | . | .  | . | 39  | 0   | .  | 11    | .    |    |
| 185 | Botswana             | 38  | 3 | 1  | . | 20  | 17  | .  | 16    | 0    |    |
| 186 | AntiguaandBarbuda    | 26  | . | .  | 3 | .   | 19  | 4  | 1     | 266  | 31 |
| 187 | St.VincentGrenadines | 26  | . | .  | . | .   | 15  | 11 | .     | 234  | .  |
| 188 | Gambia               | 25  | . | 1  | . | 20  | 4   | .  | 10    | 0    |    |
| 189 | Namibia              | 25  | 1 | .  | . | 16  | 9   | .  | 10    | .    |    |
| 190 | Timor-Leste          | 24  | . | .  | . | 24  | 0   | .  | 18    | .    |    |
| 191 | Suriname             | 23  | . | 1  | . | 9   | 13  | .  | 39    | 2    |    |
| 192 | Grenada              | 23  | . | .  | . | 18  | 5   | 2  | 204   | .    |    |
| 193 | NewCaledonia         | 20  | 1 | .  | . | 18  | 2   | .  | 70    | .    |    |
| 194 | Curaçao              | 19  | . | 1  | . | 14  | 4   | .  | 116   | 6    |    |
| 195 | Laos                 | 19  | . | .  | . | 16  | 3   | .  | 3     | .    |    |
| 196 | Belize               | 18  | . | 2  | . | 16  | 0   | .  | 45    | 5    |    |
| 197 | Fiji                 | 18  | . | .  | . | 15  | 3   | .  | 20    | .    |    |
| 198 | SaintLucia           | 18  | . | .  | . | 18  | 0   | .  | 98    | .    |    |
| 199 | Dominica             | 16  | . | .  | . | 16  | 0   | .  | 222   | .    |    |
| 200 | SaintKittsandNevis   | 15  | . | .  | . | .   | 15  | 0  | .     | 282  | .  |
| 201 | FalklandIslands      | 13  | . | .  | . | .   | 13  | 0  | .     | 3746 | .  |
| 202 | Greenland            | 13  | . | .  | . | 11  | 2   | .  | 229   | .    |    |
| 203 | TurksandCaicos       | 12  | . | 1  | . | 11  | 0   | .  | 310   | 26   |    |
| 204 | VaticanCity          | 12  | . | .  | . | 2   | 10  | .  | 14981 | .    |    |
| 205 | Montserrat           | 11  | . | 1  | . | 10  | 0   | .  | 2204  | 200  |    |
| 206 | Seychelles           | 11  | . | .  | . | 11  | 0   | .  | 112   | .    |    |
| 207 | MSZaandam            | 9   | . | 2  | . | .   | 7   | .  | .     | .    |    |
| 208 | WesternSahara        | 9   | . | 1  | . | 6   | 2   | .  | 15    | 2    |    |
| 209 | BritishVirginIslands | 8   | . | .  | 1 | .   | 7   | 0  | .     | 265  | 33 |
| 210 | PapuaNewGuinea       | 8   | . | .  | . | 8   | 0   | .  | 1     | .    |    |
| 211 | CaribbeanNetherlands | 7   | . | .  | . | .   | 7   | 0  | .     | 267  | .  |
| 212 | St.Barth             | 6   | . | .  | . | 6   | 0   | .  | 608   | .    |    |
| 213 | Anguilla             | 3   | . | .  | . | 3   | 0   | .  | 200   | .    |    |
| 214 | Lesotho              | 2   | . | .  | . | 1   | 1   | .  | 1     | .    |    |
| 215 | SaintPierreMiquelon  | 1   | . | .  | . | .   | 1   | 0  | .     | 173  | .  |

;

```
run
;
proc
table spe;
run
;
```

freq

data

```
/*
```

---

|          |     |       |      |        |
|----------|-----|-------|------|--------|
| Asses    | 132 | 6.70  | 132  | 6.70   |
| Beehives | 127 | 6.45  | 259  | 13.15  |
| Buffaloe | 46  | 2.34  | 305  | 15.48  |
| Camelids | 2   | 0.10  | 307  | 15.58  |
| Camels   | 49  | 2.49  | 356  | 18.07  |
| Cattle   | 213 | 10.81 | 569  | 28.88  |
| Chickens | 213 | 10.81 | 782  | 39.70  |
| Ducks    | 101 | 5.13  | 883  | 44.82  |
| Geeseand | 57  | 2.89  | 940  | 47.72  |
| Goats    | 204 | 10.36 | 1144 | 58.07  |
| Horses   | 180 | 9.14  | 1324 | 67.21  |
| Mules    | 87  | 4.42  | 1411 | 71.62  |
| Pigeons, | 11  | 0.56  | 1422 | 72.18  |
| Pigs     | 194 | 9.85  | 1616 | 82.03  |
| Rabbitsa | 71  | 3.60  | 1687 | 85.63  |
| Rodents, | 2   | 0.10  | 1689 | 85.74  |
| Sheep    | 195 | 9.90  | 1884 | 95.63  |
| Turkeys  | 86  | 4.37  | 1970 | 100.00 |

```
*/
```

```
data
set
if
keep
rename
run
;
proc
;
data
```

ass;

animal;

spe= "Asses"

country value;

value=asses;

```
proc
by
run
;
proc
;
data
```

sort

country;

```
data
set
if
keep
rename
run
;
proc
;
data
```

beeh;

animal;

spe= "Beehives"

country value;

value=Beeh;

```
proc
by
run
;
proc
;
data
```

sort

country;

```

data
set
if
keep
rename
run
                                buff;
                                animal;
                                spe=
                                "Buffaloe"
                                country value;
                                value=Buffalo;
                                ;

proc
by
run
                                sort
                                data
                                country;
                                ;

data
set
if
keep
rename
run
                                camelid;
                                animal;
                                spe=
                                "Camelids"
                                country value;
                                value=camelids;
                                ;

proc
by
run
                                sort
                                data
                                country;
                                ;

data
set
if
keep
rename
run
                                camels;
                                animal;
                                spe=
                                "Camels"
                                country value;
                                value=Camels;
                                ;

proc
by
run
                                sort
                                data
                                country;
                                ;

data
set
if
keep
rename
run
                                cattle;
                                animal;
                                spe=
                                "Cattle"
                                country value;
                                value=cattle;
                                ;

proc
by
run
                                sort
                                data
                                country;
                                ;

data
set
if
keep
rename
run
                                chick;
                                animal;
                                spe=
                                "Chickens"
                                country value;
                                value=chick;
                                ;

proc
by
run
                                sort
                                data
                                country;
                                ;

data
set
if
                                ducks;
                                animal;
                                spe=
                                "Ducks"

```

```

keep          country value;
rename      value=Ducks;
run

proc          sort          data
by          country;
run

data        gees;
set        animal;
if        spe=          "Geeseand"
keep
rename    country value;
value=geesand;
run

proc          sort          data
by          country;
run

data        goat;
set        animal;
if        spe=          "Goats"
keep
rename    country value;
value=goats;
run

proc          sort          data
by          country;
run

data        horse;
set        animal;
if        spe=          "Horses"
keep
rename    country value;
value=horse;
run

proc          sort          data
by          country;
run

data        mules;
set        animal;
if        spe=          "Mules"
keep
rename    country value;
value=Mule;
run

proc          sort          data
by          country;
run

data        pigen;
set        animal;
if        spe=          "DPigenons,"
keep

```



```

rename                                value=pigen;
run                                ;

proc                                data
by                                sort
run                                country;
data                                ;
set                                pig;
if                                animal;
keep                                spe= "Pigs"
rename                                country value;
run                                value=pigs;

proc                                data
by                                sort
run                                country;

data                                rabbit;
set                                animal;
if                                spe= "Rabbitsa"
keep                                country value;
rename                                value=rabbit;
run                                ;

proc                                data
by                                sort
run                                country;
data                                ;
set                                roden;
if                                animal;
keep                                spe= "Rodents,"
rename                                country value;
run                                value=roden;

proc                                data
by                                sort
run                                country;

data                                sheep;
set                                animal;
if                                spe= "Sheep"
keep                                country value;
rename                                value=sheep;
run                                ;

proc                                data
by                                sort
run                                country;

data                                turkey;
set                                animal;
if                                spe= "Turkeys"

```

```

keep
rename
run
;
country value;
value=Turkey;

proc
by
run
;
country;
sort
data

data
set
if
keep
rename
run
;
crop;
element=
country quantity;
quantity=Apples;
"Apples"

proc
by
run
;
country;
sort ;

data
set
if
keep
rename
run
;
crop;
element=
country quantity;
quantity=Barley;
"Barley"

proc
by
run
;
country;
sort ;

data
set
if
keep
rename
run
proc
by
run
;
crop;
element=
country quantity;
quantity=Maize;
"Maize"

proc
by
run
;
country;
sort ;

data
merge
by
run
;
country;
all;
ass beeh buff camelid camels cattle chick ducks gees horse
sort
data

```

```

by country;
run ;

data all2;
merge all corona;
by country;
run ;

proc freq data
table country;
run ;

data all3;
set all2;
logtot=log(Totalcases+
logasses=log(asses+
logbeeh=log(beeh+
logbuffalo=log(buffalo+
logcamels=log(camels+
logcattle=log(cattle+
logchick=log(chick+
logducks=log(ducks+
loggeesand=log(geesand+
loghorse=log(horse+
loggoats=log(goats+
logmule=log(mule+
logpigs=log(pigs+
logsheep=log(sheep+
logturkey=log(turkey+
lograbbit=log(rabbit+
logapples=log(apples+
logbarley=log(barley+
logmaize=log(maize+
run ;
/*
proc sort data=all3;
by beeh;
run;

proc print data=all3;
var beeh country;
run;

proc sort data=all3;
by pigs;
run;

proc print data=all3;
var pigs country;
run;

```

```
proc sort data=all3;
by chick;
run;
```

```
proc print data=all3;
var chick country;
run;
*/
```

```
proc univariate
var logpigs pigs;
histogram;
run;
```

```
proc means data
run;
```

```
/* ***** CORR ***** */
```

```
proc corr data
title " corr "
var totalcases logtot;
with logasses logbeeh logbuffalo logcamels logcattle logchick logducks loggeesand logmule loghorse
loggoats lograbbit logsheep logturkey logapples logmaize logbarley ;
run;
```

```
/* ***** REG ***** */
```

```
proc reg data
title " logtot model com
model logtot = logbeeh logcattle logchick logpigs
loggoats logsheep logturkey loghorse lograbbit logapples logmaize logbarley
/selection=stepwise slentry=
run;
quit;
```

```
/* ***** */
```

```

/***** LASSO *****/
ods graphics on/ labelmax=
                                title                                " logtot model co
proc                                glmselect
model logtot = logbeeh logcattle logchick logpigs
                                loggoats logsheep logturkey loghorse lograbbit logapples logmaize logbarl
/selection=lasso (choose =cp steps=
run                                ;

ods rtf close;

/***** PCA *****/
/***** model Complete *****/
/*****

ods graphics on;

proc                                princomp
id country;
                                var totalcases beeh cattle chick pigs
                                apples maize barley;
title                                ' logtot PCA of Food Consumption and COVID-19 Param
run                                ;
ods rtf close;

/***** Bayesian *****/

ods graphics on ;
proc                                genmod                                da
model logtot = logbeeh logcattle logchick logpigs
                                loggoats logsheep logturkey loghorse lograbbit logapples logmaize logbarl
                                bayes seed=
run                                ;

ods rtf close;

/**** Statements compute the estimate of the probability ofbeing positive *****/

```

```
data                                Prob;                                PostSurg;
set
    beeh2=(logbeeh >
    cattl2 = (logcattle >
    goats2=(loggoats>
    sheep2=(logsheep>
    turkey2=(logturkey>

    chicks2=(logchick>

    pig2=(logpigs>
    horse2=(loghorse >
    rabbit2=(lograbbit >

    apple2=(logapples>
    barley2=(logbarley >
    maize2=(logmaize>

run

proc                                Means                                data
run                                ;
title                                " totalcases freshfn2=(freshf<0) "
quit;
```
